# Supplementary material for: PM2.5 episodes in central Taiwan under weak southwesterly winds in spring
Source: Research Square preprint supplement (doi:10.21203/rs.3.rs-6798112/v1), 2025-06-16
Supplement: Supplementary file 1 [file 05629c5934a0fc00d0881494.xlsx]

## Sheet: Fig.S1
	Miaoli (ML)	Taichuang (TC)	Changhua (CH)	Yunlin (YuL)	Nantou (NT)		Miaoli (ML)	Taichuang (TC)	Changhua (CH)	Yunlin (YuL)	Nantou (NT)
PM2.5 yearly average	(μg m-3)	(μg m-3)	(μg m-3)	(μg m-3)	(μg m-3)		超標站日數	超標站日數	超標站日數	超標站日數	超標站日數
2006	29.3522	34.9674	36.4837	34.9431	39.2901		425	908	565	536	649
2007	28.231	36.0227	37.8255	35.8908	38.4622		394	903	584	552	611
2008	28.8864	35.3871	33.8744	35.5866	36.4244		420	970	527	573	620
2009	29.5531	36.4505	37.1044	38.4166	38.9587		463	1039	647	676	727
2010	26.9692	34.0951	35.4287	35.4535	33.9798		396	905	561	557	588
2011	29.4344	34.2996	35.1449	36.3937	36.0729		435	816	580	515	635
2012	24.4709	30.1538	30.5183	30.9478	32.1803		326	801	514	657	557
2013	26.568	31.4609	32.7569	32.8561	34.9021		363	750	529	727	611
2014	24.9073	26.9887	29.6557	30.7842	31.4479		290	596	447	647	539
2015	21.0045	23.6113	25.1742	27.1423	29.402		211	504	338	519	487
2016	18.5977	22.7696	23.9676	26.4323	24.316		165	440	297	497	314
2017	18.7875	20.1735	22.7296	26.7876	26.474		116	312	247	504	392
2018	19.4853	18.8714	21.717	23.9058	23.0233		158	278	235	389	252
2019	16.4012	17.7349	19.1773	20.8745	20.2162		85	195	153	281	174
2020	13.3062	15.3117	15.9119	17.4829	17.7595		34	124	92	179	109
2021	14.1137	16.8571	17.7726	18.8035	18.8332		40	199	138	204	161
2022	10.6815	12.7304	14.9436	14.5139	14.2784		14	52	66	100	48
2023	12.9937	15.6284	17.2455	17.4898	16.3572		21	91	102	170	68
2024	12.5504	13.9639	14.9434	16.1649	16.6295		16	42	65	121	61

## Sheet: Fig.S2
	Miaoli (ML)	Taichuang (TC)	Changhua (CH)	Yunlin (YuL)	Nantou (NT)			Miaoli (ML)	Taichuang (TC)	Changhua (CH)	Yunlin (YuL)	Nantou (NT)
	OBS.	OBS.	OBS.	OBS.	OBS.			MOD.	MOD.	MOD.	MOD.	MOD.
PM2.5 daily average	(μg m-3)	(μg m-3)	(μg m-3)	(μg m-3)	(μg m-3)			(μg m-3)	(μg m-3)	(μg m-3)	(μg m-3)	(μg m-3)
2019-04-01	9.71739	9.71667	11.3768	15.1732	21.2826			10.5571	21.488	22.3806	30.9312	34.0571
2019-04-02	20.9052	26.2642	26.4028	31.8834	34.503			27.5186	33.8287	30.9955	36.1957	36.7702
2019-04-03	16.4722	17.6042	19.0833	23.7292	29.5574			17.587	17.1556	17.3988	21.2736	20.9863
2019-04-04	17.4167	21.45	22.7222	31.1146	30.5278			16.9514	23.1774	23.8749	31.4466	32.3562
2019-04-05	22.0694	23.5846	25.8056	34.4716	38.75			27.8728	33.3815	35.6214	39.1576	34.092
2019-04-06	29.0972	34.4333	36.4444	32.7313	39.5694			33.1976	39.3609	40.6823	32.6706	36.7524
2019-04-07	41.4306	37.1083	44.3889	38.2188	37.1806			35.3252	41.2195	42.5343	41.4684	39.693
2019-04-08	38.2778	35.5036	39.3889	36.0938	33.2289			37.2943	36.9926	34.2634	29.4492	37.8573
2019-04-09	26.8194	23.7083	24.4058	24.3125	22.2917			21.3609	21.8968	18.974	14.7113	18.5302
2019-04-10	21.6667	20.0246	17.2361	16.9276	17.5344			16.4365	21.5373	17.4377	19.0808	23.7866
2019-04-11	15.288	20.9313	17.5	21.6214	23.5139			11.0365	17.0481	14.2141	15.4529	22.4311
2019-04-12	15.2524	14.3384	16.8786	18.7396	22.6766			17.1328	19.5451	20.2344	28.1407	28.5123
2019-04-13	18.0278	16.8833	18.625	28.0734	31.2361			19.56	19.7357	21.7402	24.4033	25.5431
2019-04-14	18.4167	14.4833	19.9028	22.7708	20.7361			14.186	11.5831	15.3166	18.6597	17.5965
2019-04-15	21.163	18.2978	22.1111	26.6544	26.337			17.6335	23.9435	25.6155	33.4229	31.977
2019-04-16	16.2343	17.8338	16.2639	24.5267	24.0139			17.2689	16.623	15.0077	24.3897	19.5552
2019-04-17	20.8056	18.7634	25.8194	27.0246	24.1806			23.81	24.0831	27.3384	26.4832	26.6724
2019-04-18	27.5556	27.9417	34.3245	32.7917	30.6705			24.0613	25.4592	26.3246	29.1823	30.6593
2019-04-19	24.6667	19.9905	20.9167	17.8071	14.1162			18.1421	11.3278	10.2921	9.18421	8.26733
2019-04-20	16.5833	14.519	17.2198	20.4366	12.4167			14.091	13.2072	19.5185	20.1079	12.7961
2019-04-21	9.43561	12.1417	15.4595	14.2917	14.375			9.35313	11.4351	13.9521	11.7176	11.3627
2019-04-22	14.186	15.5333	16.5556	14.8333	14.8895			12.4914	17.1156	16.0728	12.4932	17.6541
2019-04-23	14.2258	15.3511	15.8877	12.9029	14.2391			14.9142	16.906	14.8463	11.3264	14.7555
2019-04-24	13.7874	15.3114	14.4372	12.7794	15.3696			14.2306	15.4466	12.6232	10.4822	15.6696
2019-04-25	15.4722	14.1333	16.9444	15.0842	15.4125			15.8321	16.0545	16.7973	14.0915	14.0741
2019-04-26	18.3194	19.8127	21.9722	21.6979	18.629			18.213	24.091	21.2457	22.3832	18.6878
2019-04-27	16.2083	23.5917	24.3889	26.1562	23.8611			15.2479	22.7812	18.7331	19.7875	25.4238
2019-04-28	20.8333	22.0083	22.1389	24.8333	26.2222			20.3826	24.8467	24.4216	24.7028	28.7848
2019-04-29	22.7965	26.5333	29.9809	24.8854	25.9192			21.9675	27.2147	24.0673	19.4133	29.9894
2019-04-30	15.0513	19.0558	20.1864	17.0688	17.8472			11.2261	15.4234	12.9514	11.1384	13.6581

## Sheet: Fig.S3、S4
	Taipei (TP)												Banqiao (BQ)												Pingzhen (PZ)												Hsinchu (HC)												Miaoli (ML)
	OBS.					MOD.							OBS.					MOD.							OBS.					MOD.							OBS.					MOD.							OBS.
	(°C)	(m s-1)	(degree)	(%)		(°C)	(m s-1)	(degree)	(%)				(°C)	(m s-1)	(degree)	(%)		(°C)	(m s-1)	(degree)	(%)				(°C)	(m s-1)	(degree)	(%)		(°C)	(m s-1)	(degree)	(%)				(°C)	(m s-1)	(degree)	(%)		(°C)	(m s-1)	(degree)	(%)				(°C)
	Temperature	Wind_speed	WD	RH		Temperature	Wind_speed	WD	RH				Temperature	Wind_speed	WD	RH		Temperature	Wind_speed	WD	RH				Temperature	Wind_speed	WD	RH		Temperature	Wind_speed	WD	RH				Temperature	Wind_speed	WD	RH		Temperature	Wind_speed	WD	RH				Temperature
2019-03-22 08:00:00	21.3	4.7	100	75		21	4.3	76.3	87.1			2019-03-22 08:00:00	21.3	3.5	80	74		20.6	2.4	43.1	94.5			2019-03-22 08:00:00	19.4	1.1	48	88		19.7	1.3	50.2	92.8			2019-03-22 08:00:00	21.4	1.6	60	78		21	2	46.9	89.9			2019-03-22 08:00:00	21.7
2019-03-22 09:00:00	21.7	4.2	110	73		21.6	2.9	72.2	77.5			2019-03-22 09:00:00	21.6	2.2	70	73		21.7	1.9	76.1	77.1			2019-03-22 09:00:00	19.7	1.9	48	88		20.5	1.1	35.2	84			2019-03-22 09:00:00	23.3	1.9	70	75		23.1	2.1	32.6	73.2			2019-03-22 09:00:00	23.6
2019-03-22 10:00:00	22.4	5.1	100	72		22.1	1.8	74.4	76.3			2019-03-22 10:00:00	22.3	3.3	70	70		22.6	2.5	86	72.6			2019-03-22 10:00:00	20.6	1.7	46	84		21.3	2.1	58.3	77.8			2019-03-22 10:00:00	23.5	2.2	10	72		24.4	2.4	26.8	67.2			2019-03-22 10:00:00	24.9
2019-03-22 11:00:00	22.1	4.3	100	72		22.8	4.2	73.4	71.2			2019-03-22 11:00:00	22.5	2.8	60	70		23.4	3	77.4	67.9			2019-03-22 11:00:00	-999.7	-999.7	-999.7	-9997		22	2.9	32.2	74.7			2019-03-22 11:00:00	23.7	3.3	10	72		24.6	3.5	14.4	66.7			2019-03-22 11:00:00	24.5
2019-03-22 12:00:00	21.8	4.3	100	74		21.9	4.5	70.6	74.6			2019-03-22 12:00:00	21.5	4.3	70	74		23	4.2	84.7	69.2			2019-03-22 12:00:00	-999.7	-999.7	-999.7	-9997		22.2	2.6	18.8	75.7			2019-03-22 12:00:00	22.4	3.2	20	75		24.1	3.4	17.4	67.5			2019-03-22 12:00:00	23.7
2019-03-22 13:00:00	21.4	4.1	110	73		20.9	4.2	59	78.2			2019-03-22 13:00:00	21.5	2.9	70	72		21.7	2.7	74.1	74			2019-03-22 13:00:00	19.6	2.7	32	88		21.7	2.1	38.8	75.7			2019-03-22 13:00:00	20.9	2.7	20	78		23.1	3	28.9	69.1			2019-03-22 13:00:00	22
2019-03-22 14:00:00	20.6	3	90	76		20.5	3.6	60.2	79.2			2019-03-22 14:00:00	20.4	3.4	60	77		21.2	3.1	71.7	75.2			2019-03-22 14:00:00	18.4	2.3	22	91		20	2.4	50.8	82.3			2019-03-22 14:00:00	21.1	2.2	40	77		22	2.6	20.5	73.7			2019-03-22 14:00:00	22
2019-03-22 15:00:00	20.3	4.5	100	76		19.9	4.2	59.4	80.5			2019-03-22 15:00:00	20.2	2.8	70	77		20.7	2.8	74.4	77.8			2019-03-22 15:00:00	18.6	2.4	45	90		19.2	2.5	60.3	84.4			2019-03-22 15:00:00	20.4	2.9	10	78		20.7	3.1	20.2	78.1			2019-03-22 15:00:00	22.7
2019-03-22 16:00:00	20.1	3.9	100	74		19.4	4.2	62	81.3			2019-03-22 16:00:00	20	4.2	70	73		20.2	3.8	80.9	77.5			2019-03-22 16:00:00	17.3	2.9	19	91		18.6	3.1	53.2	87.2			2019-03-22 16:00:00	19.3	3.8	20	80		19.9	3.8	28.3	78.7			2019-03-22 16:00:00	20.7
2019-03-22 17:00:00	19.6	4.7	90	75		18.9	4.1	58.8	81.8			2019-03-22 17:00:00	19.6	3.7	70	74		19.6	2.6	72.2	77.8			2019-03-22 17:00:00	17.2	1.9	21	89		17.9	1	40.9	88.3			2019-03-22 17:00:00	19.1	3.5	10	79		19.3	3.5	23.2	80.8			2019-03-22 17:00:00	20.3
2019-03-22 18:00:00	19	5	90	76		18.4	4.8	60.8	83.8			2019-03-22 18:00:00	19.1	3.5	60	74		19.1	3.2	74.9	78.9			2019-03-22 18:00:00	17.4	3.1	44	86		17.2	2.7	40	89.3			2019-03-22 18:00:00	18.5	3.5	20	80		18.9	3.6	33.8	79.5			2019-03-22 18:00:00	19.9
2019-03-22 19:00:00	18.3	4	90	79		17.9	3.9	58.6	84.5			2019-03-22 19:00:00	18.3	4.3	70	79		18.5	3	72.7	82			2019-03-22 19:00:00	16.8	4.5	26	88		17.1	1.7	45.9	87.6			2019-03-22 19:00:00	18	2.9	30	83		18.5	3.2	33.2	80.6			2019-03-22 19:00:00	19.3
2019-03-22 20:00:00	18.1	3.7	100	83		17.7	3.9	60.8	85.6			2019-03-22 20:00:00	18.2	3.9	70	80		18.3	2.7	72.8	82.6			2019-03-22 20:00:00	16.5	3.5	32	91		16.7	2	47.3	89.7			2019-03-22 20:00:00	17.9	2.9	30	83		18.1	3.1	32.9	82.8			2019-03-22 20:00:00	19
2019-03-22 21:00:00	17.8	6.1	90	83		17.4	5	58.2	85.4			2019-03-22 21:00:00	17.9	4.4	60	79		18	3.5	66.2	82.3			2019-03-22 21:00:00	16.4	3.5	31	89		16.5	2.5	47.2	90.5			2019-03-22 21:00:00	17.7	2.7	20	82		18	2.9	40.5	82.2			2019-03-22 21:00:00	18.7
2019-03-22 22:00:00	17.9	4.3	90	82		17.4	4	58.7	85.1			2019-03-22 22:00:00	18	3.5	60	77		18	2.6	73.1	80.5			2019-03-22 22:00:00	15.8	2.4	20	91		16.3	1.7	47.2	88.7			2019-03-22 22:00:00	17.8	1.9	40	80		17.8	2.3	38.5	81.8			2019-03-22 22:00:00	18.3
2019-03-22 23:00:00	17.7	5.2	70	80		17.2	4.7	60.2	85.7			2019-03-22 23:00:00	17.8	3.2	70	77		17.8	2.7	75.3	81.1			2019-03-22 23:00:00	16	3	34	89		16.1	2.8	33.8	88.9			2019-03-22 23:00:00	17.5	2.5	40	81		17.5	3	42.7	81.2			2019-03-22 23:00:00	18.2
2019-03-23	17.5	4.7	90	80		16.9	4.5	61.9	86.5			2019-03-23	17.6	3	50	77		17.4	2.8	75.4	83.1			2019-03-23	15.8	3.4	39	89		15.8	2.7	53.3	89.2			2019-03-23	17.2	2.6	30	81		17.4	2.9	38.4	80.9			2019-03-23	18.1
2019-03-23 01:00:00	17.4	5.2	100	79		16.7	4.7	64.1	86.2			2019-03-23 01:00:00	17.3	4.1	70	78		17.2	3	72.4	82.9			2019-03-23 01:00:00	15.5	3.8	30	89		15.6	2.3	53	90.2			2019-03-23 01:00:00	17.1	3	30	80		17.3	3.1	36.1	80.6			2019-03-23 01:00:00	18.2
2019-03-23 02:00:00	17.1	4.5	80	79		16.7	4.3	64.9	84.4			2019-03-23 02:00:00	17.2	3.4	60	78		17.1	2.6	74.3	80.8			2019-03-23 02:00:00	15.5	3.5	31	88		15.4	2.3	48.9	90.3			2019-03-23 02:00:00	17.1	2.7	20	80		17.1	3	32.8	81.3			2019-03-23 02:00:00	17.6
2019-03-23 03:00:00	16.9	4.6	110	79		16.6	4.1	62.1	83.1			2019-03-23 03:00:00	16.9	3.9	70	77		16.9	2.9	63.9	81.4			2019-03-23 03:00:00	15.2	3.6	40	88		15.3	2.6	44.5	87.6			2019-03-23 03:00:00	16.9	3.4	20	80		17	3.6	37.2	80.7			2019-03-23 03:00:00	17.2
2019-03-23 04:00:00	16.2	4.1	90	85		16.2	3.9	62.5	85.3			2019-03-23 04:00:00	16.2	3.3	70	82		16.5	2.2	76.9	83			2019-03-23 04:00:00	14.7	2.7	31	94		14.9	1.5	50.5	89.6			2019-03-23 04:00:00	16.5	3.5	20	81		16.7	3.7	42.7	80.9			2019-03-23 04:00:00	16.8
2019-03-23 05:00:00	16.1	4.5	100	82		15.9	4.3	62.6	84.4			2019-03-23 05:00:00	16.2	2.7	70	80		16.2	2.7	73.1	82.5			2019-03-23 05:00:00	14	2.4	22	95		14.4	3.3	47.4	93.2			2019-03-23 05:00:00	15.6	3.1	20	85		16.2	3.6	39.2	81.5			2019-03-23 05:00:00	16.6
2019-03-23 06:00:00	15.8	4.1	80	86		15.8	3.7	58.5	84			2019-03-23 06:00:00	16	3.4	80	81		16.1	2.6	74	81.9			2019-03-23 06:00:00	13.7	3.1	37	97		14	1.2	54.6	93.8			2019-03-23 06:00:00	15.5	2.4	40	86		15.9	2.8	51.8	83.2			2019-03-23 06:00:00	-999.7
2019-03-23 07:00:00	15.9	4.6	100	85		15.7	4.3	64.3	82.6			2019-03-23 07:00:00	15.9	3.4	80	78		15.9	3.3	67.4	81.6			2019-03-23 07:00:00	13.7	3	30	95		13.9	3.4	43.4	92.3			2019-03-23 07:00:00	15.4	2.5	30	83		15.8	2.9	49.5	81.3			2019-03-23 07:00:00	15.4
2019-03-23 08:00:00	15.9	4.1	90	85		15.9	3.5	68.6	81.4			2019-03-23 08:00:00	15.9	3.2	70	77		15.9	2.8	77.4	81.6			2019-03-23 08:00:00	13.8	3.8	41	89		14.3	2.4	49.9	88.4			2019-03-23 08:00:00	15.9	3.3	20	79		16	3.6	46.5	77.9			2019-03-23 08:00:00	15.5
2019-03-23 09:00:00	15.9	5.7	80	82		16	4.7	69.7	80.2			2019-03-23 09:00:00	16	3.7	70	77		16.5	3.2	82.6	76.8			2019-03-23 09:00:00	14.5	4.6	40	87		14.7	3.4	47.8	84.8			2019-03-23 09:00:00	16.3	3.5	20	78		16.5	3.7	40.9	76			2019-03-23 09:00:00	15.4
2019-03-23 10:00:00	16.2	4.2	80	79		16.3	4	68.3	77.5			2019-03-23 10:00:00	16.2	4.2	70	74		16.3	2.1	78.3	76.4			2019-03-23 10:00:00	14.5	3.5	41	84		14.6	3	45	86.7			2019-03-23 10:00:00	16.2	3.7	30	76		17	4.1	40.2	71.5			2019-03-23 10:00:00	16.4
2019-03-23 11:00:00	16.4	4.2	90	78		16.2	4	60.6	78.2			2019-03-23 11:00:00	16.3	3.1	80	73		16.7	3	71.7	75.4			2019-03-23 11:00:00	14.4	3.8	37	84		15.3	2.9	49	80.3			2019-03-23 11:00:00	16.1	3.2	30	77		16.6	3.7	40.2	73.5			2019-03-23 11:00:00	16.3
2019-03-23 12:00:00	16.3	5.1	80	77		16.5	4.3	67.2	75.2			2019-03-23 12:00:00	16.3	4.5	70	73		16.7	3.7	75.4	74.6			2019-03-23 12:00:00	14.4	3.2	37	85		15	1.9	41.3	82.4			2019-03-23 12:00:00	16.4	2	30	75		16.8	2.4	48.2	73.3			2019-03-23 12:00:00	16.6
2019-03-23 13:00:00	16.4	4.6	80	74		16.3	2.9	72.8	76.8			2019-03-23 13:00:00	16.5	3.5	70	71		16.6	3.4	75.1	74.7			2019-03-23 13:00:00	14.5	3.5	34	83		14.9	2.3	48.6	83.3			2019-03-23 13:00:00	16.2	4.8	30	75		16.9	4.7	40.9	72.1			2019-03-23 13:00:00	16.8
2019-03-23 14:00:00	16.7	3.5	80	72		16.2	3.2	67.2	76.8			2019-03-23 14:00:00	16.6	3.9	70	69		16.6	3.2	72	73.9			2019-03-23 14:00:00	14.4	2.6	25	81		15.2	1.9	56	80.1			2019-03-23 14:00:00	16.5	3.1	20	73		16.8	3.5	47.3	72.2			2019-03-23 14:00:00	16.2
2019-03-23 15:00:00	16.4	4	90	74		16.3	3.4	73.1	75.2			2019-03-23 15:00:00	16.1	2.8	70	74		16.6	2.7	78.2	72.4			2019-03-23 15:00:00	13.1	2.9	30	96		14.8	2.1	42.7	81.4			2019-03-23 15:00:00	16	3	50	77		16.3	3.5	42.7	74.5			2019-03-23 15:00:00	15.8
2019-03-23 16:00:00	16	4	80	73		16.2	3.6	81.3	73.3			2019-03-23 16:00:00	16	3.4	60	72		16.2	3.6	71.9	73			2019-03-23 16:00:00	13	3	27	97		14.5	3.3	51.1	81.5			2019-03-23 16:00:00	15.8	2.1	20	76		16.5	2.6	45.8	72			2019-03-23 16:00:00	15.6
2019-03-23 17:00:00	16.1	3.9	110	70		16	3.3	66.2	73.1			2019-03-23 17:00:00	15.9	2.7	70	71		16.2	2.1	84.4	72.5			2019-03-23 17:00:00	13.5	3.1	58	87		14	1.2	58.4	83.3			2019-03-23 17:00:00	15.5	2.9	30	75		15.9	3.4	46.8	73.9			2019-03-23 17:00:00	15.6
2019-03-23 18:00:00	16	3.5	110	71		15.8	3.3	68.4	74.8			2019-03-23 18:00:00	15.7	2.2	70	72		16	2.5	83.8	72.3			2019-03-23 18:00:00	13.1	3.9	61	87		13.5	2.9	55.4	86.3			2019-03-23 18:00:00	15.6	3.1	40	75		15.7	3.6	54.6	73.7			2019-03-23 18:00:00	15.5
2019-03-23 19:00:00	15.9	3.2	100	73		15.6	3	72.5	75.7			2019-03-23 19:00:00	15.6	3.3	60	73		15.4	2.8	96.5	79			2019-03-23 19:00:00	13.2	3.5	57	87		13.3	2.4	62.1	86.7			2019-03-23 19:00:00	15.7	3.2	40	73		15.7	3.6	65.9	73.7			2019-03-23 19:00:00	15.4
2019-03-23 20:00:00	15.5	4	100	73		15.2	3.4	85.8	76.2			2019-03-23 20:00:00	15.3	2.9	60	73		15.1	2.8	79.8	78			2019-03-23 20:00:00	13	4.5	48	88		13.2	3.2	66.4	86.1			2019-03-23 20:00:00	15.5	3.9	20	76		15.5	4.2	51.7	75.4			2019-03-23 20:00:00	15.5
2019-03-23 21:00:00	15.8	3.8	110	70		15.3	3.3	103.6	74.4			2019-03-23 21:00:00	15.5	3	70	70		15.4	2.9	95.8	73.9			2019-03-23 21:00:00	-999.7	-999.7	-999.7	-9997		13.3	4.3	60.7	83.8			2019-03-23 21:00:00	15.4	3.6	30	72		15.4	4.1	42.9	72.9			2019-03-23 21:00:00	15.4
2019-03-23 22:00:00	15	3.1	90	80		15.3	2.7	91.2	74.4			2019-03-23 22:00:00	14.9	3.2	70	74		14.8	1.4	92.7	80.4			2019-03-23 22:00:00	12.4	4.6	55	91		12.9	3.2	63	85.7			2019-03-23 22:00:00	14.3	3.4	20	81		15	4.1	44	74.7			2019-03-23 22:00:00	15.3
2019-03-23 23:00:00	14.3	3.2	80	84		14.6	2.5	101.3	82.3			2019-03-23 23:00:00	14.6	2.5	60	77		14.7	2.1	90.6	81.5			2019-03-23 23:00:00	12	4.7	44	94		12.7	2.4	61.5	88.5			2019-03-23 23:00:00	14.1	3.6	40	83		14.6	4.1	41	77.9			2019-03-23 23:00:00	15.1
2019-03-24	14.1	3.6	120	87		14.5	3.4	77.3	81.8			2019-03-24	14.2	2.7	60	81		14.7	2.7	88.4	81.9			2019-03-24	12.2	4.4	40	92		12.8	3.3	60.1	88.2			2019-03-24	14.6	3.2	30	77		14.6	3.8	38.4	78			2019-03-24	15.2
2019-03-24 01:00:00	14.2	4.8	110	88		14.4	3.9	92.6	86.2			2019-03-24 01:00:00	14.4	4.3	70	80		14.5	3.7	88	84.3			2019-03-24 01:00:00	12.8	5.1	39	85		12.7	3.9	54.2	90.5			2019-03-24 01:00:00	14.7	3.4	50	77		14.6	4.1	35.3	79.2			2019-03-24 01:00:00	15.3
2019-03-24 02:00:00	14.3	4.5	110	87		14.5	2.8	90.2	82.6			2019-03-24 02:00:00	14.5	3.5	60	80		14.5	3.4	81	84.6			2019-03-24 02:00:00	12.5	3.8	34	90		12.6	4.6	51.1	93.4			2019-03-24 02:00:00	14.5	3.5	20	80		14.6	4.2	34.8	80.6			2019-03-24 02:00:00	15.1
2019-03-24 03:00:00	14.1	3.1	110	89		14.4	3	94.6	87.8			2019-03-24 03:00:00	14.2	3.1	60	82		14.4	3	84.7	87.4			2019-03-24 03:00:00	12.3	4.7	35	93		12.5	4.7	49.2	94.5			2019-03-24 03:00:00	14.1	2.9	30	83		14.4	3.5	41	81.9			2019-03-24 03:00:00	-999.7
2019-03-24 04:00:00	14.2	3.2	120	89		14.7	3.1	92.9	84.5			2019-03-24 04:00:00	14.2	3.1	60	83		14.7	2.6	83.5	84.3			2019-03-24 04:00:00	12.2	4.5	38	95		12.8	2.7	47.3	91.2			2019-03-24 04:00:00	14	2.2	50	85		14.6	2.6	37.5	81.6			2019-03-24 04:00:00	13.6
2019-03-24 05:00:00	14.7	4.2	120	86		15	4.1	83.9	82.1			2019-03-24 05:00:00	14.6	4.1	60	82		15	3.6	89.3	82.7			2019-03-24 05:00:00	12.5	3.8	40	94		13	3.4	50.2	90.7			2019-03-24 05:00:00	14.4	2.1	30	84		14.6	2.7	39.4	82.9			2019-03-24 05:00:00	13.5
2019-03-24 06:00:00	14.7	4	120	87		15.3	3.7	95	80.3			2019-03-24 06:00:00	15	4.1	60	79		15.1	3.7	88.2	82.5			2019-03-24 06:00:00	13.2	4.3	51	89		13.3	4.2	48.3	87.2			2019-03-24 06:00:00	14.8	2.4	40	83		14.8	3	49.6	82.1			2019-03-24 06:00:00	13.6
2019-03-24 07:00:00	15.7	3.8	110	84		15.9	3.9	111.4	77			2019-03-24 07:00:00	15.8	5.3	70	73		15.6	4.1	87.5	79.2			2019-03-24 07:00:00	13.9	4.5	57	84		13.9	4.3	48.6	82.4			2019-03-24 07:00:00	15.4	2	70	80		15.3	2.2	48	78.7			2019-03-24 07:00:00	13.8
2019-03-24 08:00:00	16.4	5.3	80	82		15.7	4.8	100.6	80.5			2019-03-24 08:00:00	16.2	5	60	75		16	3.9	88	79.8			2019-03-24 08:00:00	14.2	2.9	42	86		14.2	2	53.8	82.5			2019-03-24 08:00:00	15.4	0.2	0	86		15.7	0.5	58.5	78.4			2019-03-24 08:00:00	14.2
2019-03-24 09:00:00	16.5	4.3	90	79		16.8	4.1	108.6	76.4			2019-03-24 09:00:00	16.6	4	70	75		16.7	3.9	83	75.3			2019-03-24 09:00:00	14.5	3.3	76	88		14.5	2.9	52.2	85.5			2019-03-24 09:00:00	15.7	1	130	82		15.9	1.3	58.5	79.7			2019-03-24 09:00:00	14.7
2019-03-24 10:00:00	16.7	5.3	90	82		16.7	3.9	82.1	81.8			2019-03-24 10:00:00	17	3.9	60	76		16.7	3.5	68.7	80.8			2019-03-24 10:00:00	14.6	1.2	63	92		14.9	2.3	58.5	87.4			2019-03-24 10:00:00	16.1	0.5	310	86		15.8	0.7	54.7	86.1			2019-03-24 10:00:00	14.9
2019-03-24 11:00:00	17.4	5	100	81		17.2	4.3	81	82.6			2019-03-24 11:00:00	17.2	3.9	50	76		17.2	3.5	58.3	81.3			2019-03-24 11:00:00	14.9	0.8	58	91		15.2	2.3	62.8	89.5			2019-03-24 11:00:00	15.8	0.7	170	89		15.7	0.9	39.8	89.9			2019-03-24 11:00:00	15.1
2019-03-24 12:00:00	17.6	4	100	83		17.7	3.4	70.8	79.6			2019-03-24 12:00:00	17.5	3	70	75		17.8	2.8	62.6	78.3			2019-03-24 12:00:00	15	1.1	123	94		15.5	1.4	69.4	90.1			2019-03-24 12:00:00	16.3	0.9	110	89		16.1	0.7	142.3	89.3			2019-03-24 12:00:00	15.3
2019-03-24 13:00:00	18	3.3	80	83		17.8	3	67.1	82.4			2019-03-24 13:00:00	17.9	2.7	60	75		17.8	2.9	61	80.7			2019-03-24 13:00:00	15	1.9	96	95		15.7	2.2	71.1	89.1			2019-03-24 13:00:00	16.6	0.8	100	89		16.5	0.7	57.4	89.3			2019-03-24 13:00:00	15.8
2019-03-24 14:00:00	17.7	4.6	100	84		18	3.6	66.7	83.6			2019-03-24 14:00:00	17.9	2.2	60	77		17.9	2.4	58.2	82.3			2019-03-24 14:00:00	15.1	1.1	94	96		15.9	2.4	81.1	91.2			2019-03-24 14:00:00	17	1.3	100	88		17	1.5	46.1	86.9			2019-03-24 14:00:00	17.1
2019-03-24 15:00:00	17.8	3	100	88		17.8	3.2	67.4	86.7			2019-03-24 15:00:00	18	3.2	60	80		17.9	1.7	45	86.2			2019-03-24 15:00:00	15.5	0	0	96		16	1.5	73.3	92.7			2019-03-24 15:00:00	17.3	0	0	89		17.1	0.8	66	90.4			2019-03-24 15:00:00	17
2019-03-24 16:00:00	18.3	3.3	70	86		18.1	2.6	68	86.8			2019-03-24 16:00:00	18.1	1.9	60	80		18.1	1.8	63.1	86.1			2019-03-24 16:00:00	15.6	0.2	0	96		16	0.6	91.9	95.6			2019-03-24 16:00:00	17.2	0.4	180	89		17.1	0.5	12	90.6			2019-03-24 16:00:00	16.9
2019-03-24 17:00:00	18.3	3.7	80	86		18.1	2.2	58.1	87.9			2019-03-24 17:00:00	18.3	1.3	50	80		18.2	1.6	55.5	86.9			2019-03-24 17:00:00	15.5	0.8	150	97		15.9	0.9	46.6	96.6			2019-03-24 17:00:00	17.1	0.9	110	91		17	0.8	66.8	91.9			2019-03-24 17:00:00	16.9
2019-03-24 18:00:00	18.4	3.1	90	86		17.9	2.3	70	89.7			2019-03-24 18:00:00	18.4	1.4	70	79		18.1	1.6	59.8	87.7			2019-03-24 18:00:00	15.3	0.8	108	98		15.8	0.8	56.4	97.9			2019-03-24 18:00:00	17.2	0.3	100	91		16.9	0.4	108.7	93.3			2019-03-24 18:00:00	17
2019-03-24 19:00:00	18.4	2.8	80	85		17.9	2.2	74.9	90.5			2019-03-24 19:00:00	18.1	1.3	60	82		17.8	1.3	44.6	89.4			2019-03-24 19:00:00	15.4	0.4	192	98		15.8	0.7	116	97			2019-03-24 19:00:00	17.2	1.1	90	91		17	1.3	90.8	93.3			2019-03-24 19:00:00	17.2
2019-03-24 20:00:00	18.6	3.2	90	84		17.8	2.7	81.8	91.1			2019-03-24 20:00:00	18.4	1.5	70	80		17.9	1.3	99.5	90.8			2019-03-24 20:00:00	15.5	0.5	106	98		15.9	0.7	125.2	95			2019-03-24 20:00:00	17.3	0.5	120	90		17.2	0.5	43.9	91.5			2019-03-24 20:00:00	17.4
2019-03-24 21:00:00	18.6	2.3	90	84		18.3	2.2	70.5	88.6			2019-03-24 21:00:00	18.3	0.9	80	82		18.2	0.7	128.7	89			2019-03-24 21:00:00	15.9	0.2	0	97		15.8	0.3	84.2	95.3			2019-03-24 21:00:00	17.4	0.2	0	91		17.2	0.3	81.4	92.3			2019-03-24 21:00:00	17.5
2019-03-24 22:00:00	18.5	1.3	140	86		18	1.6	93.8	92.4			2019-03-24 22:00:00	17.9	1.1	240	84		18.1	0.7	151.3	90			2019-03-24 22:00:00	15.7	1.1	215	98		15.8	0.4	3.7	94.7			2019-03-24 22:00:00	17.2	0.2	0	91		17.2	0.3	25.4	93			2019-03-24 22:00:00	17.5
2019-03-24 23:00:00	18.1	0.8	190	87		18	0.8	127.5	90.7			2019-03-24 23:00:00	17.5	0.8	190	86		17.8	1	205.9	87.7			2019-03-24 23:00:00	15.9	0.3	235	96		15.9	0.4	157.7	92.2			2019-03-24 23:00:00	17.1	0.2	0	91		17.1	0.2	331.1	92.5			2019-03-24 23:00:00	-999.7
2019-03-25	18	1.1	180	85		17.7	0.7	192.5	90.2			2019-03-25	17.2	0.9	200	86		17.6	1.1	215.3	86			2019-03-25	16.1	0.7	220	96		16.1	0.3	187.3	91.3			2019-03-25	17.2	1	100	91		17	0.9	65.1	93.5			2019-03-25	17.4
2019-03-25 01:00:00	17.8	1.3	170	84		17.7	0.7	202.8	84.3			2019-03-25 01:00:00	17.2	0.1	0	85		17.6	0.1	176.2	85.4			2019-03-25 01:00:00	16	0	0	97		16.2	0.2	170.3	91.7			2019-03-25 01:00:00	17.1	0.6	50	92		17	0.6	32.8	93.5			2019-03-25 01:00:00	17.4
2019-03-25 02:00:00	17.4	0.6	160	86		17.6	0.5	175.6	85			2019-03-25 02:00:00	16.9	0.3	290	87		17.5	0.4	209.8	87			2019-03-25 02:00:00	16	0.4	212	97		16.2	0.2	182.6	92.6			2019-03-25 02:00:00	16.9	0.8	130	92		17.1	0.7	113.9	93.2			2019-03-25 02:00:00	17.1
2019-03-25 03:00:00	17.6	0.4	270	86		17.6	0.3	298.4	86.1			2019-03-25 03:00:00	17.1	0.7	140	87		17.3	0.4	243.2	87.7			2019-03-25 03:00:00	16.3	0	0	96		16.2	1.2	182	92.6			2019-03-25 03:00:00	17.1	0.3	140	93		17.1	0.3	287	93.5			2019-03-25 03:00:00	17.2
2019-03-25 04:00:00	17.8	1.1	240	85		17.6	0.8	208.6	86			2019-03-25 04:00:00	17.2	1.5	210	86		17.4	1.3	175.6	88.4			2019-03-25 04:00:00	16.2	1.5	217	96		16.4	1	217.4	92.8			2019-03-25 04:00:00	17.2	0.3	120	93		17.3	0.3	154.2	93.2			2019-03-25 04:00:00	17.4
2019-03-25 05:00:00	17.7	0.1	0	87		17.5	0.2	214.9	87.3			2019-03-25 05:00:00	17.3	0.8	190	86		17.4	0.7	210.8	88.1			2019-03-25 05:00:00	16.8	1.5	212	93		16.7	0.5	176	92.2			2019-03-25 05:00:00	17.4	1.1	120	93		17.4	1	126.2	93.7			2019-03-25 05:00:00	17.7
2019-03-25 06:00:00	17.9	0.9	160	86		17.6	0.2	25.5	88.4			2019-03-25 06:00:00	17.7	0.5	160	85		17.5	0.5	258.5	88.2			2019-03-25 06:00:00	16.8	1.4	212	97		16.8	1	206.1	89.9			2019-03-25 06:00:00	17.5	0.7	100	93		17.6	0.6	258.4	93.2			2019-03-25 06:00:00	18.4
2019-03-25 07:00:00	18.3	0.5	230	84		18.2	0.4	186.1	86.1			2019-03-25 07:00:00	18	0.3	360	85		18.1	0.1	335.9	85.4			2019-03-25 07:00:00	17.3	0.4	222	96		17.8	0.3	218.4	85.7			2019-03-25 07:00:00	17.8	0	0	92		18	0.1	196.1	90.3			2019-03-25 07:00:00	18.9
2019-03-25 08:00:00	18.7	0.7	250	82		19.1	0.3	268.3	81.6			2019-03-25 08:00:00	18	0.3	250	86		19.2	0.1	98.7	79.6			2019-03-25 08:00:00	17.2	0.3	316	97		18.9	1.6	248	84.5			2019-03-25 08:00:00	18.5	1.4	360	91		19	0.8	317.1	85.7			2019-03-25 08:00:00	18.8
2019-03-25 09:00:00	18.2	2.3	140	89		19.7	1.4	265.7	81.4			2019-03-25 09:00:00	18.4	1	250	84		19.7	0.9	197.9	81.2			2019-03-25 09:00:00	17	0	0	98		18.5	0.6	250.9	84			2019-03-25 09:00:00	18.4	0.2	0	90		19.2	0.2	338.3	86.1			2019-03-25 09:00:00	19.1
2019-03-25 10:00:00	18.9	0.6	20	92		20.1	0.6	228.6	81.9			2019-03-25 10:00:00	19.1	0.7	300	93		20.9	0.9	225.9	78.5			2019-03-25 10:00:00	17.2	1.2	211	98		18.2	0.5	268.5	89.3			2019-03-25 10:00:00	18.7	0.5	190	92		19.7	0.6	222.3	86.5			2019-03-25 10:00:00	18.6
2019-03-25 11:00:00	19.4	0.5	250	92		20.5	0.7	251.3	85.6			2019-03-25 11:00:00	19.2	0	0	95		21.6	0.7	250.6	77.6			2019-03-25 11:00:00	18.2	0.3	224	98		18.4	0.8	233.1	91.9			2019-03-25 11:00:00	18.9	0	0	93		19.2	0.9	264.4	91.4			2019-03-25 11:00:00	19.1
2019-03-25 12:00:00	19.7	0.5	250	93		20.6	0.7	276.7	84			2019-03-25 12:00:00	19.4	0.7	280	92		20.4	0.8	295.1	85.6			2019-03-25 12:00:00	17.5	0.4	323	98		17.5	1.3	296.2	100			2019-03-25 12:00:00	18	2.6	310	92		18.3	2.1	320.1	93.4			2019-03-25 12:00:00	18.9
2019-03-25 13:00:00	18.6	1.4	320	92		19.1	1.7	316.5	92.5			2019-03-25 13:00:00	18.6	1.3	20	92		19.3	1	276.9	93.6			2019-03-25 13:00:00	15.9	0.5	329	98		16.9	0.4	303.9	96.9			2019-03-25 13:00:00	17.1	1	170	91		17.6	0.9	317.2	92			2019-03-25 13:00:00	16.8
2019-03-25 14:00:00	19	0.8	270	93		18.8	1	286.1	93.8			2019-03-25 14:00:00	19	0.9	250	93		18.9	0.9	268.7	89.7			2019-03-25 14:00:00	16.4	0.7	133	98		16.7	0.4	231.4	95.3			2019-03-25 14:00:00	17.5	0.6	150	94		17.7	0.6	180.4	93.3			2019-03-25 14:00:00	17
2019-03-25 15:00:00	19.1	0.6	270	92		18.8	0.9	284.7	92.1			2019-03-25 15:00:00	18.7	1.4	220	92		18.8	1.2	228.2	90.6			2019-03-25 15:00:00	16.5	0.2	0	98		17.2	0.9	205.4	90.1			2019-03-25 15:00:00	17.8	0.5	310	91		18	0.5	284.1	90.8			2019-03-25 15:00:00	18.6
2019-03-25 16:00:00	18.7	1.6	310	90		18.3	1.9	311	92.3			2019-03-25 16:00:00	18.5	1.1	250	92		18.8	1.2	270	90.4			2019-03-25 16:00:00	16.4	0.2	0	98		17.5	1	272.7	88.5			2019-03-25 16:00:00	18.1	0	0	91		18.2	0.2	295.2	89.7			2019-03-25 16:00:00	19.5
2019-03-25 17:00:00	18.6	1.1	270	92		18.3	1.4	314.7	89.7			2019-03-25 17:00:00	18.5	1.1	230	92		18	1.3	350	93.8			2019-03-25 17:00:00	16.7	0	0	98		16.9	0.7	314.5	95.1			2019-03-25 17:00:00	18.3	0.4	60	90		18.2	0.5	341.6	91.1			2019-03-25 17:00:00	19.4
2019-03-25 18:00:00	18.4	1	320	92		18.2	1.3	296.3	92.1			2019-03-25 18:00:00	18.3	0.8	360	92		18.1	1	340	93.6			2019-03-25 18:00:00	16.7	0	0	98		16.7	0.1	288.9	99.2			2019-03-25 18:00:00	18.5	0.2	0	89		18.3	0.2	66.2	90.7			2019-03-25 18:00:00	18.9
2019-03-25 19:00:00	18.5	0.5	240	91		18.2	0.7	269.9	93.2			2019-03-25 19:00:00	18.2	1	240	93		18.2	0.7	286.8	93.3			2019-03-25 19:00:00	16.6	0.3	114	98		17	0.7	204.5	97.4			2019-03-25 19:00:00	18.3	1.5	100	90		18.2	1.5	77.7	91.8			2019-03-25 19:00:00	18.5
2019-03-25 20:00:00	18.6	0.8	280	91		18.2	1.1	280.4	92.5			2019-03-25 20:00:00	18.2	0.7	340	94		18.3	0.7	316.3	92.7			2019-03-25 20:00:00	16.6	0.2	0	98		17	0.1	212	95.5			2019-03-25 20:00:00	18.4	0.1	0	90		18.2	0.2	69.2	91.6			2019-03-25 20:00:00	18.4
2019-03-25 21:00:00	18.7	0.2	0	89		18.3	0.3	299.8	92			2019-03-25 21:00:00	18.2	0.2	0	93		18.4	0.2	349.6	92.4			2019-03-25 21:00:00	16.7	1.3	31	99		17	0.1	299.6	96.3			2019-03-25 21:00:00	18.5	1.1	30	89		18.4	1.2	62	89.9			2019-03-25 21:00:00	18.2
2019-03-25 22:00:00	18.7	1.4	210	89		18.3	0.9	267.2	92.6			2019-03-25 22:00:00	18.1	0.1	0	94		18.2	0.2	22.4	94.3			2019-03-25 22:00:00	16.6	0	0	99		17	0.5	24.4	98.3			2019-03-25 22:00:00	18.4	0.9	70	90		18.6	0.9	68.8	89.8			2019-03-25 22:00:00	-999.7
2019-03-25 23:00:00	18.2	2.2	120	88		18.2	1.7	241.6	92.1			2019-03-25 23:00:00	18.2	1	230	94		17.9	0.6	351.5	95.4			2019-03-25 23:00:00	16.7	0.4	87	99		16.9	0.8	42.3	100			2019-03-25 23:00:00	18.4	0.6	90	90		18.7	0.6	25.8	89.6			2019-03-25 23:00:00	18.2
2019-03-26	18	1.3	130	89		18	1	226	91.8			2019-03-26	17.9	1.2	60	94		18	1	6.9	90.7			2019-03-26	16.6	1.3	39	99		16.8	1.2	46.7	100			2019-03-26	18.5	1.4	80	89		18.5	1.5	28.2	91.6			2019-03-26	18.2
2019-03-26 01:00:00	17.6	2.3	110	87		17.6	1.6	90.9	87.7			2019-03-26 01:00:00	17.3	2.3	70	94		17.8	1.7	357.6	87.7			2019-03-26 01:00:00	16.3	0.6	17	99		16.5	0.9	31.4	100			2019-03-26 01:00:00	18.2	1.5	30	86		18.4	1.5	24.5	88.7			2019-03-26 01:00:00	18.3
2019-03-26 02:00:00	17.8	3.2	90	85		17.6	2.6	66.1	83.9			2019-03-26 02:00:00	17.3	1.8	80	91		17.5	1.5	107.4	87.5			2019-03-26 02:00:00	16	1.7	48	99		16.1	1.5	61.4	100			2019-03-26 02:00:00	18	1.6	50	85		18.2	1.6	49.1	87.5			2019-03-26 02:00:00	18.2
2019-03-26 03:00:00	18	1.6	100	83		17.7	1.8	84.6	82.5			2019-03-26 03:00:00	17.6	1.8	60	89		17.7	1.5	89.8	84.5			2019-03-26 03:00:00	15.2	2.3	42	98		15.5	1.3	50.4	100			2019-03-26 03:00:00	17.8	1.6	70	83		17.8	1.8	57.3	86.5			2019-03-26 03:00:00	17.9
2019-03-26 04:00:00	18	3.5	90	81		17.6	3.2	80.7	81.1			2019-03-26 04:00:00	17.8	2.2	60	85		17.7	2	87.1	83.6			2019-03-26 04:00:00	15.3	1.8	30	98		15.7	2.1	53.7	96.7			2019-03-26 04:00:00	17.8	2.2	70	83		17.5	2.2	66.4	86.8			2019-03-26 04:00:00	17.8
2019-03-26 05:00:00	18.1	2.9	100	79		17.7	2.8	94.1	82.7			2019-03-26 05:00:00	17.9	1.8	60	83		17.7	1.6	88.1	82.8			2019-03-26 05:00:00	15.6	2.3	40	92		15.7	1.4	51	95.2			2019-03-26 05:00:00	17.2	0.3	40	84		17.3	0.4	36.8	86.4			2019-03-26 05:00:00	17.4
2019-03-26 06:00:00	18.2	3.3	80	78		17.9	2.8	79.5	81.3			2019-03-26 06:00:00	18	3.3	60	82		17.9	2.6	67.9	82.1			2019-03-26 06:00:00	15.8	3	30	91		15.7	2	33.4	93.5			2019-03-26 06:00:00	17.1	1.1	20	83		17.1	1.4	32.8	84.9			2019-03-26 06:00:00	17
2019-03-26 07:00:00	18.6	4.3	80	78		18.3	1.4	73.8	77.3			2019-03-26 07:00:00	18.6	3	50	80		18.4	2.1	72.5	77			2019-03-26 07:00:00	16.2	2.8	32	89		16.3	1.3	46.5	90			2019-03-26 07:00:00	17.7	1.2	30	82		17.8	1.5	49.6	81.5			2019-03-26 07:00:00	17.1
2019-03-26 08:00:00	19.3	4.8	80	75		19.2	3.9	79.1	74.5			2019-03-26 08:00:00	19.5	4.1	70	76		19.2	1.9	71.4	75.3			2019-03-26 08:00:00	17.4	3	41	85		17.2	2.1	46.8	85.2			2019-03-26 08:00:00	18.9	1.9	10	79		18.8	2.4	38.2	78.9			2019-03-26 08:00:00	17.9
2019-03-26 09:00:00	20	4.8	80	72		19.7	4.6	73.3	72.3			2019-03-26 09:00:00	20.2	5.5	60	72		19.9	4.1	67	72.1			2019-03-26 09:00:00	18.6	2.3	46	81		18.6	2.7	49.5	80.5			2019-03-26 09:00:00	20	2.4	20	74		20.3	2.7	40.2	72.3			2019-03-26 09:00:00	-999.7
2019-03-26 10:00:00	21.2	5.1	80	68		20.2	4.8	67.5	70.1			2019-03-26 10:00:00	21.3	5.2	70	68		20.6	4.5	62.2	69.7			2019-03-26 10:00:00	18.9	2.9	36	79		19.6	2.9	59.1	76.1			2019-03-26 10:00:00	20.8	2.9	30	73		21.7	2.8	39.1	68.1			2019-03-26 10:00:00	19.7
2019-03-26 11:00:00	22.4	4.7	90	62		21.2	4.8	71.5	66.1			2019-03-26 11:00:00	22	5.4	60	64		21.8	4.5	71.1	65.1			2019-03-26 11:00:00	19.7	2.3	32	77		20.8	2.8	51.3	72			2019-03-26 11:00:00	22	2.4	20	70		22.7	2.2	47.1	65			2019-03-26 11:00:00	20.6
2019-03-26 12:00:00	22.8	5.7	80	59		21.9	5.2	69.5	63.2			2019-03-26 12:00:00	23	4.2	60	61		22.5	3.9	69.9	62.4			2019-03-26 12:00:00	20.4	2.2	28	74		21.7	2.3	54.5	67.8			2019-03-26 12:00:00	22.9	2.9	10	66		23.7	2.8	28	61.1			2019-03-26 12:00:00	22.3
2019-03-26 13:00:00	22.4	7.6	90	59		22.2	6.1	74.7	60.9			2019-03-26 13:00:00	23	4.4	60	60		22.8	4.1	70.6	61.4			2019-03-26 13:00:00	20.9	2.4	62	71		22.2	2.2	56.5	66.8			2019-03-26 13:00:00	23.4	2.9	10	65		24.6	2.4	22.3	59.8			2019-03-26 13:00:00	23.9
2019-03-26 14:00:00	22.8	6.2	100	59		22.5	5.2	77.1	62.1			2019-03-26 14:00:00	23.1	5.2	60	61		23	4.2	78.4	61.6			2019-03-26 14:00:00	21.3	2.5	38	69		22.6	2	66	65.9			2019-03-26 14:00:00	24.7	2.4	360	61		25	2.5	17	59.1			2019-03-26 14:00:00	24.9
2019-03-26 15:00:00	22.5	6.2	90	61		22.1	5.5	80.4	63.1			2019-03-26 15:00:00	22.8	5	50	61		22.7	4.6	73.5	62			2019-03-26 15:00:00	21.6	2.5	49	68		22.6	3	64	65.7			2019-03-26 15:00:00	24.8	1.8	10	63		25.2	2.2	18.4	59.8			2019-03-26 15:00:00	23.6
2019-03-26 16:00:00	22.2	6.4	80	61		22	5.2	75	63.5			2019-03-26 16:00:00	22.2	4.2	60	63		22.5	3.9	69.4	62.7			2019-03-26 16:00:00	21.3	2.3	37	71		22	2.6	67.8	67.8			2019-03-26 16:00:00	25.1	2.3	20	59		25	2.4	22.3	59.8			2019-03-26 16:00:00	23.6
2019-03-26 17:00:00	21.1	6.1	100	63		21.4	4.9	74.5	64.6			2019-03-26 17:00:00	21.6	4.1	60	66		21.9	3.9	62.6	63.5			2019-03-26 17:00:00	20.5	2.1	67	72		21.1	2.5	61.3	69.8			2019-03-26 17:00:00	24.1	1.8	30	61		24.4	2	32.3	61			2019-03-26 17:00:00	-999.7
2019-03-26 18:00:00	20.7	5.1	70	65		20.6	3.7	74.6	66.9			2019-03-26 18:00:00	20.7	3.6	50	69		21.2	3	62.9	65.5			2019-03-26 18:00:00	19	2.2	59	78		19.9	1.5	58.7	72.9			2019-03-26 18:00:00	22.5	1.5	20	65		22.9	1.8	66.8	63.7			2019-03-26 18:00:00	21.5
2019-03-26 19:00:00	20.2	5.8	90	68		20.1	2.3	76	68.5			2019-03-26 19:00:00	20.3	3.6	50	72		20.5	3.1	53.9	68			2019-03-26 19:00:00	18.4	1.6	58	81		19.2	1.3	63.5	76.2			2019-03-26 19:00:00	21	0.9	30	70		21.2	1.1	57.5	68.8			2019-03-26 19:00:00	21.1
2019-03-26 20:00:00	20.1	4.2	80	70		20.1	3.6	74.9	70			2019-03-26 20:00:00	20	3.8	60	73		20.3	3.4	54.3	70.6			2019-03-26 20:00:00	17.9	1.3	54	83		18.6	1.2	68.8	78.7			2019-03-26 20:00:00	20	1	100	75		20.4	1.2	45.6	72.7			2019-03-26 20:00:00	20.9
2019-03-26 21:00:00	20	4.4	80	71		20.1	3.8	79.6	72.8			2019-03-26 21:00:00	20.1	3.5	60	74		20.3	3.3	45.5	72.6			2019-03-26 21:00:00	17.5	1.2	91	85		18.2	1.1	78.9	82.4			2019-03-26 21:00:00	19.5	1.1	90	76		19.7	1.3	63.5	75.6			2019-03-26 21:00:00	20.3
2019-03-26 22:00:00	20.1	4.3	80	72		20	3.9	76.2	74.8			2019-03-26 22:00:00	20.2	2.6	40	75		20.3	2.4	43.2	73.8			2019-03-26 22:00:00	17	0.7	207	88		17.9	0.9	98.8	85			2019-03-26 22:00:00	19.4	1.1	100	76		19.2	1	93	79			2019-03-26 22:00:00	19.6
2019-03-26 23:00:00	20.2	4.1	90	72		19.9	3.3	73.7	75.9			2019-03-26 23:00:00	20	1.5	40	76		20.2	1.5	16.8	75.5			2019-03-26 23:00:00	16.8	0.9	209	90		17.6	0.3	117.3	87.3			2019-03-26 23:00:00	18.8	0.1	0	80		18.8	0.1	205.3	80.9			2019-03-26 23:00:00	19.4
2019-03-27	20.1	2.8	90	73		19.7	2.7	71.4	77.6			2019-03-27	19.4	1.2	50	80		20	1.1	21.2	76.2			2019-03-27	17.1	1	213	88		17.6	0.4	163.6	86.9			2019-03-27	18.4	0.3	80	82		18.5	0.4	249.3	83.6			2019-03-27	19
2019-03-27 01:00:00	20.1	1.9	80	74		19.3	2	63.5	80			2019-03-27 01:00:00	18.6	0.6	70	84		19.6	0.7	355.8	79.4			2019-03-27 01:00:00	16.9	1.1	212	89		17.5	0.5	176.1	87.1			2019-03-27 01:00:00	18.1	0	0	84		18.3	0.4	195.7	87.7			2019-03-27 01:00:00	19
2019-03-27 02:00:00	19.1	0.9	120	78		19	1.2	64.2	81.2			2019-03-27 02:00:00	17.7	1.4	200	88		19.1	0.9	326.6	81.8			2019-03-27 02:00:00	15.8	0.2	0	95		17.3	0.8	148.3	88.7			2019-03-27 02:00:00	17.8	0	0	86		17.9	0.6	217.2	88.2			2019-03-27 02:00:00	18.5
2019-03-27 03:00:00	18.6	0.8	170	81		18.7	0.5	64.5	82.1			2019-03-27 03:00:00	17.4	1.4	200	89		18.8	0.9	321	83.6			2019-03-27 03:00:00	16.3	0.5	206	94		17.7	1.2	184.4	87.8			2019-03-27 03:00:00	17.6	1.1	110	87		17.8	1	216	86.9			2019-03-27 03:00:00	18.6
2019-03-27 04:00:00	19.3	1.5	180	77		18.5	0.7	85.5	83.5			2019-03-27 04:00:00	17.3	1.4	200	90		18.5	1.1	275.4	84			2019-03-27 04:00:00	18	1.7	223	90		17.5	1.1	224.2	89.8			2019-03-27 04:00:00	17.6	0.1	0	89		17.7	0.1	210.2	88.5			2019-03-27 04:00:00	-999.7
2019-03-27 05:00:00	19.5	0.8	240	77		18.4	0.8	196.9	83.4			2019-03-27 05:00:00	17.7	1.5	200	89		18.4	1.4	238.5	84.3			2019-03-27 05:00:00	18.3	1.8	226	90		17.8	2.1	240	90			2019-03-27 05:00:00	17.8	0.6	100	90		17.8	0.8	180.4	89.3			2019-03-27 05:00:00	18.8
2019-03-27 06:00:00	19.5	0.6	240	78		18.4	0.7	217.3	86.5			2019-03-27 06:00:00	17.9	1.4	200	89		18.2	1.1	209.7	86			2019-03-27 06:00:00	18.4	1.8	221	91		17.9	1.8	239.2	90.6			2019-03-27 06:00:00	18.3	0	0	88		18.1	1	163.4	90.2			2019-03-27 06:00:00	19.3
2019-03-27 07:00:00	20	0.8	200	77		19.4	0.4	141.3	81.5			2019-03-27 07:00:00	18.5	0.8	200	87		19.2	0.7	161.3	82.7			2019-03-27 07:00:00	18.6	2.1	218	90		19.1	2.2	228.6	86.4			2019-03-27 07:00:00	19.3	0.5	100	86		19.1	0.6	146.4	86.9			2019-03-27 07:00:00	19.6
2019-03-27 08:00:00	21.3	0.8	170	72		20.9	0.1	164.2	73.2			2019-03-27 08:00:00	20.1	0.2	0	81		20.7	0.3	169.5	78.5			2019-03-27 08:00:00	19.7	1.8	224	87		20.4	1	232.5	81.2			2019-03-27 08:00:00	21	0.1	0	82		20.4	0.1	156.8	83.5			2019-03-27 08:00:00	21.1
2019-03-27 09:00:00	22.9	1.1	250	69		22.5	0.4	289	69.1			2019-03-27 09:00:00	22.6	1.3	240	74		22.8	1.1	177.4	71.1			2019-03-27 09:00:00	21.2	1.6	228	81		21.6	0.7	232.1	75.9			2019-03-27 09:00:00	22.4	0.5	220	80		22.2	0.5	124.6	77.8			2019-03-27 09:00:00	22.8
2019-03-27 10:00:00	25.6	0.7	260	64		24.3	0.8	324.1	65.7			2019-03-27 10:00:00	24.9	2.4	240	67		24.9	1.7	222	62.5			2019-03-27 10:00:00	22.5	1.1	233	72		22.9	1.3	250.3	69.9			2019-03-27 10:00:00	24.1	1.1	310	76		24.1	1.1	290.3	71.2			2019-03-27 10:00:00	24.7
2019-03-27 11:00:00	27.5	2.2	280	56		26.2	1.7	247.3	60			2019-03-27 11:00:00	26.4	1.7	260	62		26.4	2	274.1	58.2			2019-03-27 11:00:00	24.1	0.2	0	71		24.3	1.1	267.2	65.5			2019-03-27 11:00:00	24.9	1.3	330	72		25.1	1.6	274.6	66.2			2019-03-27 11:00:00	-999.7
2019-03-27 12:00:00	27.9	2.5	330	60		27	2.6	300.7	57			2019-03-27 12:00:00	26.8	1.6	270	62		27	1.7	264.2	53.3			2019-03-27 12:00:00	24	0.4	329	71		25.1	1.6	301.7	66.2			2019-03-27 12:00:00	26.2	1.2	300	66		25.5	1.5	270.8	63.8			2019-03-27 12:00:00	24.7
2019-03-27 13:00:00	27.5	2	360	61		26.9	2.1	335	62.4			2019-03-27 13:00:00	27.4	2.2	250	59		27.6	1.8	258.6	53.6			2019-03-27 13:00:00	24	0.6	323	71		25.2	2.7	283.7	66.2			2019-03-27 13:00:00	25.2	2	300	68		25.2	2.4	260.2	65.2			2019-03-27 13:00:00	25.7
2019-03-27 14:00:00	27.4	1	350	60		27.2	1.3	333.3	62.8			2019-03-27 14:00:00	26.6	2.2	220	63		27.6	1.9	252.3	57.8			2019-03-27 14:00:00	24.1	0.4	267	70		24.9	1.8	291.2	67.3			2019-03-27 14:00:00	25.6	1.3	290	66		25.6	1.6	243.8	61.3			2019-03-27 14:00:00	25.3
2019-03-27 15:00:00	27.9	1.5	280	57		27.3	1.6	332.8	61.8			2019-03-27 15:00:00	26.4	2	230	63		27.4	1.9	271.9	58			2019-03-27 15:00:00	23.9	1.5	233	65		24.8	1.9	267.3	68			2019-03-27 15:00:00	25.4	2.3	300	64		25.6	2.6	255.5	60.2			2019-03-27 15:00:00	26.3
2019-03-27 16:00:00	26.2	1.3	320	61		26.5	1.6	327.8	65.7			2019-03-27 16:00:00	25.7	1.7	260	65		27	1.6	297.9	58.7			2019-03-27 16:00:00	23.4	1.2	226	68		24.5	1.6	255.7	66.6			2019-03-27 16:00:00	25.2	1.4	320	64		25.5	1.8	261.9	59.5			2019-03-27 16:00:00	26.2
2019-03-27 17:00:00	25.5	0.9	360	64		25.9	0.9	356.9	65.9			2019-03-27 17:00:00	25.2	0.9	230	66		25.8	0.9	286.3	65.5			2019-03-27 17:00:00	23.7	0.7	232	68		24.2	1	262	66			2019-03-27 17:00:00	24.8	1	280	62		25	1.2	258.2	60.6			2019-03-27 17:00:00	25.2
2019-03-27 18:00:00	25.2	0.2	0	63		25	0.1	26.8	68.7			2019-03-27 18:00:00	24.7	0.7	190	67		25.6	0.8	212.4	63.8			2019-03-27 18:00:00	22.7	0.8	235	71		23.4	1	270.3	69.1			2019-03-27 18:00:00	23.5	0.3	210	65		24.1	0.4	248.1	63.2			2019-03-27 18:00:00	23.8
2019-03-27 19:00:00	24.6	0.8	120	68		24.4	0.7	87.7	72.2			2019-03-27 19:00:00	23.7	0.8	200	73		25	0.8	236	67.1			2019-03-27 19:00:00	21.9	0.6	231	74		22.3	0.6	241.9	71.5			2019-03-27 19:00:00	22.8	0.2	0	66		23	0.3	230.3	68.3			2019-03-27 19:00:00	22.9
2019-03-27 20:00:00	23.9	0.9	200	70		23.8	1	76.7	75.3			2019-03-27 20:00:00	22.8	0.9	200	78		24.1	1.1	242.9	71.3			2019-03-27 20:00:00	21.5	1.3	222	75		21.7	1.1	203.9	81.2			2019-03-27 20:00:00	22.7	1.4	180	70		22.3	1.1	220.6	72			2019-03-27 20:00:00	23
2019-03-27 21:00:00	23.5	1.1	190	71		23.3	1.1	161.9	75.6			2019-03-27 21:00:00	22	1	190	84		23.2	1	244.2	76.1			2019-03-27 21:00:00	20.6	1.4	207	82		21	0.8	197.1	89			2019-03-27 21:00:00	22.6	0.9	160	72		21.9	0.6	179	74.9			2019-03-27 21:00:00	22.9
2019-03-27 22:00:00	22.7	1.3	180	78		22.6	0.9	169.1	77.6			2019-03-27 22:00:00	21.4	0.9	190	86		22.5	0.9	247.3	80.5			2019-03-27 22:00:00	20.2	1	201	85		20.7	0.9	144.1	92.5			2019-03-27 22:00:00	21.4	0	0	78		21.3	0.6	97.8	79.1			2019-03-27 22:00:00	23.3
2019-03-27 23:00:00	22.3	1.2	180	77		22.3	0.5	69.9	79.2			2019-03-27 23:00:00	20.9	0.9	210	87		21.9	0.8	275.3	82.9			2019-03-27 23:00:00	19.7	0	0	87		20.4	0.4	144.1	90.9			2019-03-27 23:00:00	20.8	0.7	110	82		20.8	0.6	67	83.3			2019-03-27 23:00:00	23
2019-03-28	21.7	0.9	150	79		21.9	0.8	218	81.1			2019-03-28	20.1	0.9	190	89		21.4	0.7	263.5	84.7			2019-03-28	19.4	1	217	89		20.1	1.2	161.8	89.4			2019-03-28	20.6	0.5	80	83		20.3	0.3	81	86.8			2019-03-28	22.7
2019-03-28 01:00:00	21.4	1.2	180	78		21.5	0.7	189.5	81.8			2019-03-28 01:00:00	19.9	1.2	220	91		20.9	0.9	272.5	85.8			2019-03-28 01:00:00	19.5	0	0	87		19.9	0.4	154.3	87.6			2019-03-28 01:00:00	20.2	0	0	84		19.9	0.3	61.9	86.6			2019-03-28 01:00:00	22.6
2019-03-28 02:00:00	21.5	0.9	210	80		21.3	0.7	208	82.3			2019-03-28 02:00:00	20.1	1	190	90		20.8	0.9	298.3	87.7			2019-03-28 02:00:00	19.9	0.2	0	88		20	0.6	166.5	83.7			2019-03-28 02:00:00	21.1	0.3	140	83		20.1	0.4	299.4	87.1			2019-03-28 02:00:00	22.4
2019-03-28 03:00:00	21.4	1.3	170	79		21.2	0.9	179.1	81.6			2019-03-28 03:00:00	20.2	1.1	210	89		20.8	0.8	296.2	87.3			2019-03-28 03:00:00	20.3	1.5	221	87		20.4	0.9	200.3	82.6			2019-03-28 03:00:00	22	0.8	170	82		20.6	0.8	246	88.7			2019-03-28 03:00:00	22
2019-03-28 04:00:00	21.1	1.4	160	80		21.3	1.1	186.7	80.6			2019-03-28 04:00:00	20.6	1.1	230	87		21.2	0.4	255.4	84.6			2019-03-28 04:00:00	20.2	1.5	218	91		20.4	0.4	158.2	86.2			2019-03-28 04:00:00	22.2	0.3	999.9	84		21.1	0.4	239.2	88.6			2019-03-28 04:00:00	22.1
2019-03-28 05:00:00	21.2	1.1	160	79		21	1.1	177	80.6			2019-03-28 05:00:00	21.4	0.5	150	84		21.5	0.6	171.4	82.2			2019-03-28 05:00:00	20.7	1.4	222	93		20.4	1	156.2	82.9			2019-03-28 05:00:00	22.1	0.3	180	84		21.3	0.4	224.1	88.3			2019-03-28 05:00:00	22.1
2019-03-28 06:00:00	21.3	1.2	130	79		21.1	1	168.4	80.6			2019-03-28 06:00:00	22.3	1.5	210	83		21.6	1.2	192	83			2019-03-28 06:00:00	20.5	1.4	216	91		20.4	1.4	186.5	83.2			2019-03-28 06:00:00	21.5	0.5	170	84		21.1	0.7	186.8	85.5			2019-03-28 06:00:00	22.6
2019-03-28 07:00:00	21.4	1.3	120	79		21.8	1.1	186.2	79.9			2019-03-28 07:00:00	21.9	1.3	70	84		22.6	1.2	212.5	79.3			2019-03-28 07:00:00	20.4	0.8	186	93		21	0.5	197.6	78.9			2019-03-28 07:00:00	21.8	0.1	0	84		21.6	0.2	203.7	87.1			2019-03-28 07:00:00	23.3
2019-03-28 08:00:00	23.6	0.7	200	72		23.6	0.7	217.3	73.5			2019-03-28 08:00:00	22.8	1	100	78		24	1	205.3	67.8			2019-03-28 08:00:00	22.5	1.2	227	81		22.1	0.8	218	79.8			2019-03-28 08:00:00	24.1	0.3	130	77		24.1	0.4	221.7	75.2			2019-03-28 08:00:00	24.7
2019-03-28 09:00:00	26.4	1.1	190	65		25.8	1.4	250.6	66.7			2019-03-28 09:00:00	26.1	3.6	220	66		25.9	2.8	225.3	65.7			2019-03-28 09:00:00	24.5	2.3	226	72		24.4	2.1	237.3	72			2019-03-28 09:00:00	27	1.4	260	70		26.2	1.8	236.9	68.2			2019-03-28 09:00:00	26.9
2019-03-28 10:00:00	28.8	2.5	240	58		27.7	2.4	217.7	58.6			2019-03-28 10:00:00	28.5	3.3	220	60		27.7	2.7	196	59.2			2019-03-28 10:00:00	26.1	2.5	229	66		26.5	2.2	234	64.4			2019-03-28 10:00:00	28.9	1.3	270	63		27.3	1.7	252	65.5			2019-03-28 10:00:00	28.1
2019-03-28 11:00:00	30.7	1.6	300	54		29.1	1.7	211.2	56.5			2019-03-28 11:00:00	29.9	2.5	220	57		29.2	2.1	193.7	56.5			2019-03-28 11:00:00	27.6	2.3	232	61		27.8	2	254.7	62.9			2019-03-28 11:00:00	28.7	4.2	280	61		28.4	4.6	248.8	60.2			2019-03-28 11:00:00	28.9
2019-03-28 12:00:00	32.2	1.8	290	50		30.6	1.6	192.4	54.4			2019-03-28 12:00:00	31	2.6	230	53		30.8	2.7	252	53.4			2019-03-28 12:00:00	28.5	1.3	240	59		28.3	2.7	256.9	61.7			2019-03-28 12:00:00	28.9	3.5	270	61		28.8	4.2	249.7	59.8			2019-03-28 12:00:00	29.8
2019-03-28 13:00:00	31.7	2	310	52		31.4	2.3	296.2	50.9			2019-03-28 13:00:00	31.4	2.4	260	54		31.3	2.4	278.5	50.7			2019-03-28 13:00:00	28.5	1.2	238	61		28.5	2.5	258.9	61			2019-03-28 13:00:00	28.8	3.5	280	62		28.5	4.3	254.6	62			2019-03-28 13:00:00	30.3
2019-03-28 14:00:00	31.8	2.6	360	52		30.9	2.8	316.7	57.5			2019-03-28 14:00:00	31.1	1.3	300	54		30.9	1.7	294.7	54.9			2019-03-28 14:00:00	28.2	1.5	241	63		28.1	3	258.5	62.7			2019-03-28 14:00:00	28.2	4	280	66		28.3	4.8	255.5	63.6			2019-03-28 14:00:00	30.9
2019-03-28 15:00:00	29.9	3.7	30	57		29.9	3.3	321.9	59.2			2019-03-28 15:00:00	30.3	2.2	310	57		30.5	2.3	273.7	56.1			2019-03-28 15:00:00	27.4	1.4	241	68		27.7	2.9	255.1	62.9			2019-03-28 15:00:00	27.4	4.5	270	67		27.7	5.1	252.8	65.9			2019-03-28 15:00:00	29.3
2019-03-28 16:00:00	28.9	2.2	40	60		28.3	2.5	59	62.8			2019-03-28 16:00:00	29.5	1	10	61		29.9	1.2	275.8	56.9			2019-03-28 16:00:00	26.6	2.8	223	69		26.9	2	249.6	65.5			2019-03-28 16:00:00	27.6	2	270	67		27.4	2.4	250.5	67.8			2019-03-28 16:00:00	-999.7
2019-03-28 17:00:00	27.5	4	100	58		27.5	3.4	51.4	62.8			2019-03-28 17:00:00	27.7	2.2	70	62		28.7	1.7	345.2	59.1			2019-03-28 17:00:00	26.3	1.2	231	72		26.2	1.9	248.7	68.4			2019-03-28 17:00:00	26.4	1.4	270	71		26.3	1.8	254.9	75.1			2019-03-28 17:00:00	27.4
2019-03-28 18:00:00	26.6	2.8	100	62		26.8	2.3	61.2	64.5			2019-03-28 18:00:00	27	1.5	80	64		27.7	1.4	73.1	61.4			2019-03-28 18:00:00	25.5	0.4	236	75		25.2	0.5	228.5	75.7			2019-03-28 18:00:00	25.8	1.1	240	74		25.4	1.4	251.2	79.7			2019-03-28 18:00:00	26.5
2019-03-28 19:00:00	26.1	3	80	65		25.9	1.9	83	69.3			2019-03-28 19:00:00	26.3	1.5	80	66		26.7	1.7	93.6	63.8			2019-03-28 19:00:00	24.5	0.8	223	80		24.4	1.5	249.9	80.5			2019-03-28 19:00:00	25.3	1.6	250	78		25	2	254.1	83.6			2019-03-28 19:00:00	25.8
2019-03-28 20:00:00	25.6	2.2	70	68		25.1	1.9	84.3	73.8			2019-03-28 20:00:00	25.5	0.5	80	70		25.7	0.7	95.9	69.4			2019-03-28 20:00:00	-999.7	-999.7	-999.7	-9997		24.4	1.1	257.6	81			2019-03-28 20:00:00	25.5	0.8	999.9	76		25.4	0.9	195.7	77.9			2019-03-28 20:00:00	25.7
2019-03-28 21:00:00	25.2	1.5	130	72		24.9	1.2	90	75.7			2019-03-28 21:00:00	25.2	0.2	0	73		25.4	0.3	76.2	72.5			2019-03-28 21:00:00	23.9	1	213	85		24.2	0.5	220.7	77.7			2019-03-28 21:00:00	25.4	1.1	200	77		25.4	1.2	219.8	79.8			2019-03-28 21:00:00	25.7
2019-03-28 22:00:00	24.8	1	140	72		24.5	0.9	118	79.3			2019-03-28 22:00:00	23.5	0	0	80		24.8	0.7	41.5	75			2019-03-28 22:00:00	23	0.4	146	91		23.7	0.1	92.1	78.7			2019-03-28 22:00:00	25.2	0.6	240	79		25.1	0.7	257.2	81.6			2019-03-28 22:00:00	25.2
2019-03-28 23:00:00	24.7	1	180	72		24.2	1.1	158.1	79			2019-03-28 23:00:00	23.4	0.9	210	83		24.4	0.6	68	77			2019-03-28 23:00:00	23.5	0.6	230	86		23.5	0.7	184.3	81			2019-03-28 23:00:00	25	0.7	290	78		24.8	0.9	239.1	82			2019-03-28 23:00:00	24.9
2019-03-29	23.7	1.5	180	75		23.6	1.3	135.4	81.5			2019-03-29	23.3	0.6	190	83		24	0.5	294.6	79.3			2019-03-29	22.7	0.8	201	90		23.1	0.3	178	84.8			2019-03-29	24.5	0.6	290	78		24.5	0.8	205.2	82.4			2019-03-29	24.7
2019-03-29 01:00:00	23.7	0.9	200	76		23.3	0.9	83.8	83.5			2019-03-29 01:00:00	23.3	0.7	220	83		23.6	0.6	297.2	81.8			2019-03-29 01:00:00	22.9	0.3	225	90		22.6	0.5	275.2	89			2019-03-29 01:00:00	24.4	1	270	78		24.2	1.2	246.7	84			2019-03-29 01:00:00	24.5
2019-03-29 02:00:00	23.3	1.4	170	77		23.2	1.3	140.4	83.3			2019-03-29 02:00:00	23	0.3	210	85		23.4	0.4	72.8	81.5			2019-03-29 02:00:00	22.4	0.3	204	91		22.5	0.6	183.4	87.3			2019-03-29 02:00:00	24.7	0.9	230	76		24.1	1.1	224	80.7			2019-03-29 02:00:00	24.2
2019-03-29 03:00:00	23.3	1	170	77		23	1	154.2	82.9			2019-03-29 03:00:00	22.7	1.3	190	86		23.4	0.8	8.8	81			2019-03-29 03:00:00	22.1	0.5	186	92		22.3	0.4	157.7	87.7			2019-03-29 03:00:00	24.4	0.3	310	78		24	0.4	243.5	81.3			2019-03-29 03:00:00	24.2
2019-03-29 04:00:00	23.4	0.3	190	77		22.8	0.5	171.3	84.2			2019-03-29 04:00:00	22.8	0.9	210	85		23.2	0.5	37	82.8			2019-03-29 04:00:00	22.6	0.7	231	88		22	0.3	192.1	87.6			2019-03-29 04:00:00	24.1	0.5	280	81		23.7	0.6	260.3	82.4			2019-03-29 04:00:00	24
2019-03-29 05:00:00	22.9	2.5	310	81		22.7	1	250.7	85.5			2019-03-29 05:00:00	22.8	1.4	290	86		22.8	1.1	346.3	85.9			2019-03-29 05:00:00	20.9	0.6	336	94		21.7	0.1	148.8	86.5			2019-03-29 05:00:00	22.2	1.1	290	86		23.4	1	267.1	82.8			2019-03-29 05:00:00	23.8
2019-03-29 06:00:00	22.9	1.3	310	82		22.4	0.7	220.8	87.6			2019-03-29 06:00:00	22.6	1.4	220	86		22.8	0.9	26.6	85.9			2019-03-29 06:00:00	20.3	0	0	97		21	0.5	297.9	91.3			2019-03-29 06:00:00	21.9	1.2	320	86		22.8	0.9	311.2	82			2019-03-29 06:00:00	23.8
2019-03-29 07:00:00	23.1	1.1	320	80		22.9	1.2	276.5	83.5			2019-03-29 07:00:00	22.8	1.1	250	85		23	1.2	264.5	83.3			2019-03-29 07:00:00	20.7	0.3	331	94		21.2	0.1	261.6	87.4			2019-03-29 07:00:00	22.1	1.2	310	86		22.9	0.6	238.3	81.4			2019-03-29 07:00:00	23.9
2019-03-29 08:00:00	24.2	0.8	300	77		23.3	1	273.8	84.2			2019-03-29 08:00:00	23.3	1.6	230	83		22.8	1	302.8	85.4			2019-03-29 08:00:00	20.5	0	0	96		21.7	0.3	276	86			2019-03-29 08:00:00	22.6	1.1	300	85		23.4	1.3	267.3	82.1			2019-03-29 08:00:00	24.7
2019-03-29 09:00:00	24.4	0.8	300	76		23.7	1	294.9	82.4			2019-03-29 09:00:00	24.4	0.9	210	79		24.2	0.9	246.5	79.6			2019-03-29 09:00:00	22.6	0	0	87		23	0.7	246.9	80.5			2019-03-29 09:00:00	23.5	0.7	290	81		24.5	0.9	265.5	76.8			2019-03-29 09:00:00	25.2
2019-03-29 10:00:00	25.8	1.6	250	70		25.8	1.5	244.9	70			2019-03-29 10:00:00	25.1	1.2	270	75		25.9	1.1	219.4	68.8			2019-03-29 10:00:00	23.2	0.5	329	83		24.5	0.5	257	70.8			2019-03-29 10:00:00	25.4	1.5	290	77		25.4	1.7	271.5	73			2019-03-29 10:00:00	24.9
2019-03-29 11:00:00	26	1.4	310	70		25.2	1.7	341.5	78.5			2019-03-29 11:00:00	26.3	1.9	240	68		27.3	2	244.5	63.1			2019-03-29 11:00:00	23.6	0.7	333	83		25.1	1.2	284.5	71.8			2019-03-29 11:00:00	25.4	1.9	290	77		25.4	2.2	277.7	75.4			2019-03-29 11:00:00	24.8
2019-03-29 12:00:00	26.1	1.9	330	69		24.9	2.1	4.1	78.1			2019-03-29 12:00:00	26.1	2	260	69		26.3	2.2	315.4	70.4			2019-03-29 12:00:00	24.2	0.3	319	79		24.5	1.5	256.2	78			2019-03-29 12:00:00	26.3	2.4	300	74		24.3	2.8	307.9	81.5			2019-03-29 12:00:00	25.4
2019-03-29 13:00:00	26.6	2.4	320	66		24.9	2.7	324.5	76.3			2019-03-29 13:00:00	25.5	1.9	20	72		24.6	2.2	327.9	77.2			2019-03-29 13:00:00	23.2	0.8	328	82		24	2.5	300.4	78.7			2019-03-29 13:00:00	26.8	2	300	71		24.2	2.4	311.7	79.6			2019-03-29 13:00:00	-999.7
2019-03-29 14:00:00	26.2	1.9	320	66		24	2	333.3	78.4			2019-03-29 14:00:00	25.2	2	10	71		24.3	1.8	352.6	76.6			2019-03-29 14:00:00	22.6	0.8	342	83		23.6	1.7	296.2	78.4			2019-03-29 14:00:00	25.7	2	310	72		24.2	2.4	309	77.2			2019-03-29 14:00:00	24.6
2019-03-29 15:00:00	25.2	1.9	350	66		23.9	1.9	347.1	75.9			2019-03-29 15:00:00	24.3	1.8	360	72		23.8	2.1	347.3	76.9			2019-03-29 15:00:00	21.7	0.6	343	86		22.2	1.7	321.8	87.1			2019-03-29 15:00:00	24.6	2.5	360	74		23.7	2.5	334.8	77.9			2019-03-29 15:00:00	24.5
2019-03-29 16:00:00	23.8	1.9	120	72		23.7	1.3	326.3	77.6			2019-03-29 16:00:00	24.2	1.2	360	73		23.5	1.5	13.5	77.9			2019-03-29 16:00:00	21.4	0.7	360	86		22	1.5	1.5	89.1			2019-03-29 16:00:00	24.4	1.4	10	74		23.8	1.6	339.8	76.1			2019-03-29 16:00:00	24.1
2019-03-29 17:00:00	23.6	1.7	70	72		22.7	1.9	71.3	79			2019-03-29 17:00:00	23.9	1.1	360	74		23.4	1.1	1.8	77.3			2019-03-29 17:00:00	21.1	1.3	19	87		21.7	1.3	310.5	90.1			2019-03-29 17:00:00	23.5	2.1	30	76		23.5	2	11.4	76.4			2019-03-29 17:00:00	24.2
2019-03-29 18:00:00	23	2.3	90	74		22.5	1.5	64.5	78.6			2019-03-29 18:00:00	23.1	1.6	20	76		22.9	1.6	353.8	79.7			2019-03-29 18:00:00	20.2	0.7	356	90		21.4	0.7	310.3	89.2			2019-03-29 18:00:00	22.8	2.2	20	77		22.9	1.9	1.4	77.7			2019-03-29 18:00:00	23.2
2019-03-29 19:00:00	22.4	1.9	110	76		21.9	0.3	91.2	81.3			2019-03-29 19:00:00	22.6	0.7	10	79		22.2	0.7	335.7	81			2019-03-29 19:00:00	20	0.4	13	91		20.6	0.5	336.4	93.6			2019-03-29 19:00:00	22.3	1.2	50	79		22.1	1.2	5.7	80.9			2019-03-29 19:00:00	22.9
2019-03-29 20:00:00	22.3	1.6	120	76		21.5	1.6	71.7	83.1			2019-03-29 20:00:00	22.4	1.5	60	80		22	1.5	357.8	81.2			2019-03-29 20:00:00	19.9	0.5	354	92		20.2	1.4	326.3	93.8			2019-03-29 20:00:00	22	1.2	40	81		21.9	0.9	344.7	82.3			2019-03-29 20:00:00	22.8
2019-03-29 21:00:00	22.4	0.9	80	76		21.6	1	70.1	82.6			2019-03-29 21:00:00	22.3	1.8	60	80		21.9	1.4	244.8	82.1			2019-03-29 21:00:00	19.6	0.9	20	92		19.8	0.9	352.7	93.7			2019-03-29 21:00:00	21.8	2.1	60	80		21.7	1.7	19.9	82.5			2019-03-29 21:00:00	23
2019-03-29 22:00:00	22	3.4	110	76		21.4	2.7	77.8	82.9			2019-03-29 22:00:00	21.9	1.1	40	82		21.9	0.9	225	82.9			2019-03-29 22:00:00	19.2	0.4	17	96		19.8	0.6	346.3	94.5			2019-03-29 22:00:00	21.3	1.8	320	82		21.1	1.7	343	83.9			2019-03-29 22:00:00	18.5
2019-03-29 23:00:00	19.9	2.2	340	88		20.8	2.1	37.8	84.4			2019-03-29 23:00:00	19.2	3.4	10	88		20.5	2.1	332.1	89.3			2019-03-29 23:00:00	16.1	2.2	1	96		18.4	1.1	345.9	98.9			2019-03-29 23:00:00	18.4	3.8	360	85		20	2.3	36.5	82.6			2019-03-29 23:00:00	19.3
2019-03-30	19.2	1.9	180	88		19.3	1.6	271.1	90.3			2019-03-30	18	1.7	240	89		19.1	1.5	9.2	90.2			2019-03-30	16.4	1.2	127	98		17.3	2.3	349.8	97.9			2019-03-30	18	3.5	120	88		18.3	3.2	17.6	88.6			2019-03-30	18.3
2019-03-30 01:00:00	18.1	2.6	130	88		18.8	1.6	247.6	89.2			2019-03-30 01:00:00	18.4	2.5	40	88		19	1	76.9	87.9			2019-03-30 01:00:00	16.4	0.7	130	96		17.2	0.4	89.2	96.9			2019-03-30 01:00:00	18.4	1.9	110	86		18.3	1.9	131.9	88.7			2019-03-30 01:00:00	20
2019-03-30 02:00:00	18.5	1.5	60	89		19	1	146.6	87.6			2019-03-30 02:00:00	18.1	0.7	80	90		18.7	0.7	144.3	88.4			2019-03-30 02:00:00	16.6	0.7	31	95		17.3	0.4	104.6	96			2019-03-30 02:00:00	19	1.4	360	83		18.3	1.5	55.2	89.6			2019-03-30 02:00:00	19.2
2019-03-30 03:00:00	18.7	1.1	220	90		18.8	0.7	210.7	89.7			2019-03-30 03:00:00	18.5	0.6	220	90		18.6	0.6	247.5	90.7			2019-03-30 03:00:00	16.8	0.5	150	97		17	0.9	104.9	96.3			2019-03-30 03:00:00	18.6	1.1	100	85		18.2	1	75.2	90.9			2019-03-30 03:00:00	19.1
2019-03-30 04:00:00	18.6	0.9	210	91		18.6	0.3	128.8	91.4			2019-03-30 04:00:00	18.6	0.9	210	91		18.5	0.5	268.7	92.9			2019-03-30 04:00:00	16.9	0	0	96		17.1	0.2	141.7	97.2			2019-03-30 04:00:00	19	0.7	90	86		18.4	0.9	59.2	89.8			2019-03-30 04:00:00	19.1
2019-03-30 05:00:00	19.1	0.2	0	91		18.7	0.2	239.8	91.8			2019-03-30 05:00:00	18.5	0.5	190	91		18.8	0.2	240.7	91.7			2019-03-30 05:00:00	17	0	0	97		17.1	0.6	65.2	97.8			2019-03-30 05:00:00	18.9	0.5	60	86		18.8	0.6	56.2	87.4			2019-03-30 05:00:00	18.8
2019-03-30 06:00:00	19.2	1.1	220	90		18.8	0.7	184.1	92			2019-03-30 06:00:00	18.6	1.2	200	91		19.1	0.8	282.5	88.2			2019-03-30 06:00:00	17.2	0.3	212	97		17.4	1.1	39.3	94.3			2019-03-30 06:00:00	19.2	0	0	85		18.5	0.6	26.9	91.9			2019-03-30 06:00:00	18.8
2019-03-30 07:00:00	19.5	0.5	150	89		19	0.6	195.4	91.6			2019-03-30 07:00:00	19	0.2	0	92		19.2	0.1	244.3	89			2019-03-30 07:00:00	17.5	0	0	98		17.2	1.5	95.9	94.1			2019-03-30 07:00:00	19.5	0.9	80	87		18.5	1.1	90.9	91			2019-03-30 07:00:00	19
2019-03-30 08:00:00	19.8	0.3	190	89		19.5	0.4	175.1	88			2019-03-30 08:00:00	19.5	0.2	0	89		19.8	0.3	86.1	84.8			2019-03-30 08:00:00	17.9	1	36	95		18	0.8	88.2	90.4			2019-03-30 08:00:00	20.5	0.8	60	83		19.5	1	96.4	86.8			2019-03-30 08:00:00	20.9
2019-03-30 09:00:00	20.7	1	160	83		19.9	0.6	259.6	88.2			2019-03-30 09:00:00	20.2	0.2	0	87		20.5	0.3	278.4	83.4			2019-03-30 09:00:00	19.3	1.2	64	88		19.2	1	59.6	85.1			2019-03-30 09:00:00	22.1	0.8	90	77		21.3	1	48.8	76.7			2019-03-30 09:00:00	22
2019-03-30 10:00:00	22.6	1	140	75		21.7	0.8	140.4	77.4			2019-03-30 10:00:00	22.5	1.4	40	72		21.9	1.2	126.2	78.1			2019-03-30 10:00:00	20.6	1.6	45	83		20.8	1.2	107.6	78.1			2019-03-30 10:00:00	24.3	1.9	30	71		22.5	1.9	123.2	77.3			2019-03-30 10:00:00	23.8
2019-03-30 11:00:00	23.9	1.5	140	69		22.7	2	95.7	69.7			2019-03-30 11:00:00	23.4	1.4	60	68		23.6	1.3	147.5	70			2019-03-30 11:00:00	21.1	1.4	27	79		22.2	1.8	69.3	70.3			2019-03-30 11:00:00	24.2	2.4	20	68		23.8	2.4	103.4	68.4			2019-03-30 11:00:00	24.6
2019-03-30 12:00:00	24.6	2.7	90	67		24	2.2	80.6	64.8			2019-03-30 12:00:00	24.8	1.9	50	63		23.3	2.3	47.6	73.4			2019-03-30 12:00:00	22.1	1.6	21	75		23.5	1.5	61.5	64.6			2019-03-30 12:00:00	25.3	2.1	30	67		24.5	2.2	42.7	66.1			2019-03-30 12:00:00	24.8
2019-03-30 13:00:00	23.4	3	70	67		24.2	2.8	67	62.1			2019-03-30 13:00:00	23.5	2.4	10	69		23.5	2.1	27.7	73.2			2019-03-30 13:00:00	21.2	1.3	2	78		23.4	1.2	9.4	68			2019-03-30 13:00:00	24.9	3.1	30	69		25.5	3.4	15.7	63.3			2019-03-30 13:00:00	24.8
2019-03-30 14:00:00	23	4.2	80	67		23.9	3.2	82.6	58.1			2019-03-30 14:00:00	22.7	3.6	70	69		24.1	2.4	26.1	68.6			2019-03-30 14:00:00	21.1	1.7	11	77		22.9	0.7	24.2	72.4			2019-03-30 14:00:00	23.8	4.3	10	68		24.8	3.8	30.5	63.9			2019-03-30 14:00:00	23.9
2019-03-30 15:00:00	22.3	3.9	90	68		23.5	3.3	88.5	58.9			2019-03-30 15:00:00	22.4	2	70	70		23.8	2.3	86.2	63.5			2019-03-30 15:00:00	20.6	1.6	18	81		22.5	2.1	32.6	71			2019-03-30 15:00:00	22.9	3.2	20	69		24.4	3.3	35.9	61.7			2019-03-30 15:00:00	23.4
2019-03-30 16:00:00	22.1	4	90	67		22.9	3.4	89	64.8			2019-03-30 16:00:00	21.9	2.7	60	71		23.1	2.7	87.7	65.3			2019-03-30 16:00:00	19.9	2.2	64	83		21	2.1	72.7	82.3			2019-03-30 16:00:00	22.9	2.2	30	69		23.7	2.6	45.5	64.1			2019-03-30 16:00:00	23.8
2019-03-30 17:00:00	21.7	5.3	90	67		22	4.3	81.2	69.3			2019-03-30 17:00:00	21.6	3.5	70	70		22.3	3.2	79.7	68.1			2019-03-30 17:00:00	19.5	2.6	45	83		20.8	2.5	68.6	77.6			2019-03-30 17:00:00	22.6	3.2	30	69		23.4	3	57.3	67.9			2019-03-30 17:00:00	23.4
2019-03-30 18:00:00	21.6	4.2	100	67		21.6	3.5	82	71.7			2019-03-30 18:00:00	21.4	3	60	70		21.8	2.7	75.2	70.7			2019-03-30 18:00:00	19.1	2.7	50	82		19.9	1.8	57.8	76.6			2019-03-30 18:00:00	22	2.1	50	71		22.3	2.3	66.5	70.6			2019-03-30 18:00:00	22.7
2019-03-30 19:00:00	21.6	3.7	90	68		21.2	2.8	86.5	74.7			2019-03-30 19:00:00	21.3	2.5	60	71		21.6	2.3	70.2	73.1			2019-03-30 19:00:00	19	2.4	49	82		19.6	1.9	55.7	76.3			2019-03-30 19:00:00	21.5	2.1	60	72		21.8	2.3	62.2	68.5			2019-03-30 19:00:00	21.9
2019-03-30 20:00:00	21.7	4.4	100	68		21.2	4.1	87.1	70.6			2019-03-30 20:00:00	21.6	3.9	60	70		21.5	3.5	80.1	68.8			2019-03-30 20:00:00	19.1	1.9	50	80		19.3	2.5	53	77.6			2019-03-30 20:00:00	21.4	1.1	40	71		21.5	1.4	59.6	69.7			2019-03-30 20:00:00	21.4
2019-03-30 21:00:00	21.7	4.2	100	67		21.2	4	99.4	67.7			2019-03-30 21:00:00	21.7	3.6	60	68		21.3	3.5	79.7	69.2			2019-03-30 21:00:00	19.2	3.2	51	79		19.2	3	51.5	77.8			2019-03-30 21:00:00	21.3	1.8	80	71		21.3	2.1	61.5	69.6			2019-03-30 21:00:00	21
2019-03-30 22:00:00	21.7	3.9	100	67		21.1	4.1	94.5	69.4			2019-03-30 22:00:00	21.5	3.8	70	70		21.3	3.4	74.9	69.5			2019-03-30 22:00:00	19.4	3.5	47	78		19.1	2.8	59.2	77.2			2019-03-30 22:00:00	21.4	2	70	71		21.2	2.3	56.5	70.9			2019-03-30 22:00:00	20.7
2019-03-30 23:00:00	21.5	4.2	110	65		21	4.1	96.2	66.4			2019-03-30 23:00:00	21.2	3	60	69		21.1	3.1	79.9	68			2019-03-30 23:00:00	19.1	3.4	46	79		19	2.4	55.7	78			2019-03-30 23:00:00	21.6	1.9	50	70		21.1	2.1	49.6	70.9			2019-03-30 23:00:00	20.7
2019-03-31	21.4	4.7	90	66		21.1	3.7	91.4	63.9			2019-03-31	21.2	2.2	60	68		21.1	2.3	83.3	67.4			2019-03-31	19	3.4	46	76		18.8	1.8	49.2	72.9			2019-03-31	21.3	1.5	30	69		21	1.9	56.2	68.6			2019-03-31	20.7
2019-03-31 01:00:00	21.4	4.3	110	65		21	3.9	86.1	66.6			2019-03-31 01:00:00	21.2	2.4	60	68		21.1	2.8	84.2	66.2			2019-03-31 01:00:00	18.8	4.3	36	77		18.8	2.9	60.4	77.1			2019-03-31 01:00:00	21.1	1.9	40	69		20.8	2.4	45.7	68.1			2019-03-31 01:00:00	20.5
2019-03-31 02:00:00	21.1	5.2	100	66		20.6	4.4	99.9	70.3			2019-03-31 02:00:00	21	3.7	60	69		20.6	3.5	95.2	70.5			2019-03-31 02:00:00	18.8	4.5	36	76		18.7	3.5	60.8	77.1			2019-03-31 02:00:00	21	2	40	68		20.6	2.5	59.3	70			2019-03-31 02:00:00	20.4
2019-03-31 03:00:00	21	4.1	100	63		20.3	3.7	89.5	70.5			2019-03-31 03:00:00	20.1	2.4	80	72		20.3	2.6	98.6	70.6			2019-03-31 03:00:00	18.4	4	39	79		18.3	2.9	58.8	74			2019-03-31 03:00:00	20.8	3	40	68		20.4	3.2	51.8	66.6			2019-03-31 03:00:00	20.5
2019-03-31 04:00:00	20	2.8	120	70		19.4	2.8	90.8	77.6			2019-03-31 04:00:00	19	1.4	40	80		19.9	1.7	89.5	73.5			2019-03-31 04:00:00	17.6	3.4	37	82		17.8	2.2	61.9	79.3			2019-03-31 04:00:00	20.5	2.5	60	67		20	2.7	63.9	68.2			2019-03-31 04:00:00	20.4
2019-03-31 05:00:00	19.4	4.2	100	72		19.1	3.4	93.8	75.4			2019-03-31 05:00:00	19	2.6	60	77		19	2.3	110.1	76.6			2019-03-31 05:00:00	17.4	3.7	47	77		17.1	2.2	68.2	83.1			2019-03-31 05:00:00	20.1	3	70	66		19.5	3.3	58.2	70.6			2019-03-31 05:00:00	20.1
2019-03-31 06:00:00	19.7	3.2	130	70		19.2	3.2	99.7	73.7			2019-03-31 06:00:00	19.3	2.4	60	74		18.9	2.2	100.7	75.8			2019-03-31 06:00:00	17.4	4.4	32	78		17.1	3.3	56	79.1			2019-03-31 06:00:00	20	3.2	40	65		19.5	3.6	46.3	69			2019-03-31 06:00:00	19.7
2019-03-31 07:00:00	19.9	3.5	100	68		19.5	2.7	100.6	72.7			2019-03-31 07:00:00	19.7	1.9	50	72		19.1	2	96.5	74.5			2019-03-31 07:00:00	17.5	4.7	33	78		17.4	3	63.2	80.6			2019-03-31 07:00:00	20	2.5	30	67		19.5	3.1	45.9	69.9			2019-03-31 07:00:00	19.9
2019-03-31 08:00:00	19.6	3.1	90	70		19.6	3.3	84.1	73.2			2019-03-31 08:00:00	19.8	2.6	60	71		19.6	2.7	92.6	71.7			2019-03-31 08:00:00	17.7	5	31	78		18.2	3.1	63.6	75.9			2019-03-31 08:00:00	20.3	2.9	20	68		20.1	3.6	49.8	66.5			2019-03-31 08:00:00	20.2
2019-03-31 09:00:00	19.2	3.8	100	72		19.8	3.8	76.7	69.5			2019-03-31 09:00:00	19.5	3.4	60	72		19.9	3.6	61.8	69.5			2019-03-31 09:00:00	18	4.7	58	77		18.8	3.8	56.7	73			2019-03-31 09:00:00	21.6	4.7	60	65		21	4.9	48	63.8			2019-03-31 09:00:00	21.4
2019-03-31 10:00:00	21	5.4	90	66		19.8	4.6	77.2	71.1			2019-03-31 10:00:00	20.9	3.1	60	68		20.5	3.4	84.6	67.3			2019-03-31 10:00:00	19.7	3.5	52	73		19.9	3.5	61.7	69.5			2019-03-31 10:00:00	23.4	4.7	80	60		22.9	4.6	52.8	58.4			2019-03-31 10:00:00	23
2019-03-31 11:00:00	21.1	7.5	80	64		20.8	6.4	78.8	65			2019-03-31 11:00:00	21.4	6	60	63		21.1	5.3	78.7	64.1			2019-03-31 11:00:00	20.4	6.3	32	69		20.7	5.1	57.2	65.6			2019-03-31 11:00:00	23.8	3.7	20	59		24	4.2	43.1	55.3			2019-03-31 11:00:00	25.5
2019-03-31 12:00:00	20.2	6.8	100	66		20.7	4.6	81.9	65.2			2019-03-31 12:00:00	20	6.2	70	68		20.7	5.8	73.3	66			2019-03-31 12:00:00	20.3	5.5	35	70		21	6.1	56.6	65.3			2019-03-31 12:00:00	24	4.1	20	59		24.3	4.6	42.7	54.5			2019-03-31 12:00:00	24.7
2019-03-31 13:00:00	19.4	8	110	69		19.5	6.3	83.6	69.7			2019-03-31 13:00:00	19.4	5.4	60	71		19.9	5.1	68.4	68.7			2019-03-31 13:00:00	19.5	6.5	32	75		20	5.7	56.3	69.3			2019-03-31 13:00:00	22.6	5.1	50	62		23.9	5.3	43.8	54.9			2019-03-31 13:00:00	24.7
2019-03-31 14:00:00	19.2	6.8	90	66		19.2	5.8	79.6	69.6			2019-03-31 14:00:00	18.8	4.3	60	70		19.5	4.4	78.2	68.6			2019-03-31 14:00:00	17.7	5.3	38	78		19	5.6	59.5	72.5			2019-03-31 14:00:00	21.9	4.1	60	64		22.9	4.5	47.4	58.5			2019-03-31 14:00:00	23.9
2019-03-31 15:00:00	19.1	6.2	100	67		18.9	4	84	69.4			2019-03-31 15:00:00	18.7	5.7	70	70		19.2	4.8	75.4	69			2019-03-31 15:00:00	17.1	6.9	37	76		18.4	5	59.9	74			2019-03-31 15:00:00	20.5	4.1	40	64		21.8	4.7	47.5	59.9			2019-03-31 15:00:00	-999.7
2019-03-31 16:00:00	19	4.8	110	66		18.6	4.9	84.5	70.3			2019-03-31 16:00:00	18.4	5.7	70	70		18.8	5.1	76.2	69.4			2019-03-31 16:00:00	16.8	6	36	78		17.6	5.8	59.2	76.6			2019-03-31 16:00:00	19.8	4	40	66		20.6	4.5	51.3	63.2			2019-03-31 16:00:00	-999.7
2019-03-31 17:00:00	18.5	5.9	90	66		18.2	5.5	84.9	71.2			2019-03-31 17:00:00	18	5.1	70	71		18.3	4.5	75	70.6			2019-03-31 17:00:00	16.2	5.8	46	78		16.7	4.6	56.1	79.3			2019-03-31 17:00:00	19.7	3.5	50	65		19.6	4	54.2	66.1			2019-03-31 17:00:00	20.4
2019-03-31 18:00:00	17.6	3.4	80	72		17.6	3.8	86.9	75.4			2019-03-31 18:00:00	17.7	3.5	70	74		17.8	3.5	76.2	74.4			2019-03-31 18:00:00	15.8	5.8	38	80		16.1	4.1	55.2	81.1			2019-03-31 18:00:00	18.7	2.6	40	68		19	3.2	50.9	67.8			2019-03-31 18:00:00	19.3
2019-03-31 19:00:00	17.2	5.3	90	77		17.2	5.1	83.8	80.4			2019-03-31 19:00:00	17.6	4.5	70	76		17.4	4.4	74	79.7			2019-03-31 19:00:00	16.1	6.1	32	78		15.9	5.6	54.6	82.8			2019-03-31 19:00:00	18.6	3.4	40	68		18.5	3.8	50	70.1			2019-03-31 19:00:00	18.9
2019-03-31 20:00:00	17.3	4.7	100	76		17.1	4.5	86.5	79.4			2019-03-31 20:00:00	17.4	3.8	60	78		17.2	3.9	76.4	78.8			2019-03-31 20:00:00	15.6	5.5	35	83		15.8	5	55.9	84.2			2019-03-31 20:00:00	18.1	3.5	50	72		18	3.8	49.2	73.6			2019-03-31 20:00:00	18.6
2019-03-31 21:00:00	17.5	5	100	73		17.3	4.7	85.2	77.8			2019-03-31 21:00:00	17.4	3.9	70	76		17.5	3.8	80.7	77			2019-03-31 21:00:00	15.6	5.3	40	82		15.6	4.6	51.4	84.3			2019-03-31 21:00:00	18.1	2.8	70	71		17.9	3.2	49.9	73.2			2019-03-31 21:00:00	18.4
2019-03-31 22:00:00	17.5	5.7	90	72		17.3	4.8	82.3	75.8			2019-03-31 22:00:00	17.5	4.1	60	74		17.5	3.8	82.9	74.7			2019-03-31 22:00:00	15.7	5.7	35	80		15.6	4.5	46.9	83.6			2019-03-31 22:00:00	18	2.8	30	71		17.7	3.2	49.2	73.6			2019-03-31 22:00:00	18.2
2019-03-31 23:00:00	17.2	5.6	80	73		17.1	4.8	83.5	76.9			2019-03-31 23:00:00	17.3	4.3	60	76		17.3	4	73.4	75.8			2019-03-31 23:00:00	15.5	4.4	30	81		15.5	4.6	48.3	84.2			2019-03-31 23:00:00	18	3.3	50	71		17.7	3.7	43.9	73.3			2019-03-31 23:00:00	18.2
2019-04-01	16.5	5.2	80	78		16.6	4.6	81	82			2019-04-01	16.8	5.1	70	78		16.8	4.1	69.5	80.3			2019-04-01	15.1	5.3	35	83		15.3	3.7	47.7	85.1			2019-04-01	17.6	2.8	40	72		17.5	3.3	47.6	73.8			2019-04-01	18.2
2019-04-01 01:00:00	16.2	4.5	80	80		16.2	4.2	75.3	83.6			2019-04-01 01:00:00	16.3	5.1	80	80		16.5	4.1	71.8	81.6			2019-04-01 01:00:00	14.8	4	46	85		14.9	4.1	47.7	87.2			2019-04-01 01:00:00	17.4	2.8	60	72		17.1	3.3	42.5	75.6			2019-04-01 01:00:00	17.7
2019-04-01 02:00:00	15.6	3.3	100	85		16.2	3	84.9	81.9			2019-04-01 02:00:00	15.7	3.4	80	85		16.2	2.8	72.7	82.4			2019-04-01 02:00:00	14.1	4.6	38	89		14.4	2.7	44.7	89.6			2019-04-01 02:00:00	16.8	2.4	40	76		16.8	2.8	43.8	77.5			2019-04-01 02:00:00	17.4
2019-04-01 03:00:00	15.8	2.8	90	86		16.1	3.1	78.9	82.5			2019-04-01 03:00:00	15.9	3.1	70	86		16.1	3.1	70.2	84.7			2019-04-01 03:00:00	14.2	5.4	31	88		14.3	4	47.3	91			2019-04-01 03:00:00	16.8	2.7	50	75		16.5	3.1	41.1	78.9			2019-04-01 03:00:00	17.1
2019-04-01 04:00:00	15.6	4.6	90	87		16.1	4.1	79.2	81.2			2019-04-01 04:00:00	15.8	3.3	70	86		16.1	3.2	70.8	82.5			2019-04-01 04:00:00	13.8	4.3	31	93		14.2	3.5	50	93			2019-04-01 04:00:00	16	2	40	81		16.2	2.4	40.3	82.8			2019-04-01 04:00:00	16.8
2019-04-01 05:00:00	15.5	2.6	90	89		15.8	2.9	81.8	85.5			2019-04-01 05:00:00	15.7	2.3	60	87		15.8	2.4	70.9	86.4			2019-04-01 05:00:00	13.7	4.8	31	93		13.8	2.4	43.2	97.1			2019-04-01 05:00:00	16	3.2	20	81		16	3.5	49.7	82			2019-04-01 05:00:00	15.8
2019-04-01 06:00:00	15.3	4.1	100	89		15.6	3.4	82.3	87			2019-04-01 06:00:00	15.5	3.3	60	88		15.7	2.8	79.8	87.7			2019-04-01 06:00:00	13.4	3.7	36	96		14	2.6	50.9	94			2019-04-01 06:00:00	15.5	1.8	60	85		15.8	2.2	38.2	84.6			2019-04-01 06:00:00	15.2
2019-04-01 07:00:00	15.6	3	120	90		15.6	3.2	84.8	90.9			2019-04-01 07:00:00	15.7	3.5	60	88		15.6	3	82.4	90.4			2019-04-01 07:00:00	13.6	4	33	96		13.6	3.1	48.2	97.6			2019-04-01 07:00:00	15.6	2.7	50	85		15.9	3.1	47.8	82.2			2019-04-01 07:00:00	15.1
2019-04-01 08:00:00	16.1	4.7	100	88		16.1	4	77.6	86.3			2019-04-01 08:00:00	16.1	3.4	60	86		16	3.1	77.3	87.2			2019-04-01 08:00:00	14.1	4.7	30	94		14.1	3.4	52.4	94.6			2019-04-01 08:00:00	16	2.5	50	85		16.1	3.1	44.2	83.8			2019-04-01 08:00:00	15.4
2019-04-01 09:00:00	16.5	3.5	90	87		16.3	3.5	88.1	83.9			2019-04-01 09:00:00	16.4	3.9	60	84		16.3	3.5	75	85.5			2019-04-01 09:00:00	14.7	4.5	28	89		14.6	3.4	57.6	91.6			2019-04-01 09:00:00	16.6	2.8	30	81		16.7	3.2	41.7	79.9			2019-04-01 09:00:00	15.9
2019-04-01 10:00:00	16.8	4.3	80	87		16.2	3.8	81.5	87			2019-04-01 10:00:00	16.9	3.3	70	81		16.4	2.9	79	86.3			2019-04-01 10:00:00	15.4	4.7	35	85		15	3.3	58	91.5			2019-04-01 10:00:00	17.6	3.3	30	76		17.2	3.8	40.2	77.9			2019-04-01 10:00:00	16.6
2019-04-01 11:00:00	16.8	4.5	80	86		16.2	4	87.7	87.3			2019-04-01 11:00:00	16.9	3.9	70	81		16.6	3.5	81.5	85			2019-04-01 11:00:00	15.2	5.2	32	85		15.5	3.8	59.9	86.2			2019-04-01 11:00:00	18.3	3.2	30	74		17.5	3.8	46.1	76			2019-04-01 11:00:00	17.3
2019-04-01 12:00:00	17	5.1	100	85		16.5	4.3	88.4	87.3			2019-04-01 12:00:00	16.6	5	70	84		16.8	4.1	72	84.2			2019-04-01 12:00:00	15.7	5.4	40	85		15.6	3.8	57.9	88.5			2019-04-01 12:00:00	19.1	3	50	72		18.5	3.6	40.5	73			2019-04-01 12:00:00	-999.7
2019-04-01 13:00:00	16.5	5	100	82		16.4	4.5	67.8	83.8			2019-04-01 13:00:00	16.9	4.9	70	80		16.7	4.2	65.4	82.5			2019-04-01 13:00:00	15.5	4.4	38	85		15.7	3.9	51.6	88.7			2019-04-01 13:00:00	18.3	4.1	40	71		18.8	4.5	43.4	70.5			2019-04-01 13:00:00	17.8
2019-04-01 14:00:00	16.5	4	120	81		16.3	3.9	70.8	82.3			2019-04-01 14:00:00	16.4	4.2	60	81		16.6	3.7	73.3	80.8			2019-04-01 14:00:00	14.8	5.3	39	87		15	3.8	53.4	89.8			2019-04-01 14:00:00	17.6	3	40	74		18.5	3.6	47.4	71.2			2019-04-01 14:00:00	17.8
2019-04-01 15:00:00	16.3	4.8	110	80		16.1	4.4	83.1	82.8			2019-04-01 15:00:00	16.1	3.9	60	83		16.3	3.7	80.4	83.9			2019-04-01 15:00:00	14.3	5	37	89		14.7	4.4	54.5	88.8			2019-04-01 15:00:00	17.1	2.4	30	75		18	3	49.2	69.8			2019-04-01 15:00:00	17.9
2019-04-01 16:00:00	16.8	4.4	110	77		16.3	3.9	85.3	82.5			2019-04-01 16:00:00	16.4	3.4	60	82		16.7	3.3	82.5	80.5			2019-04-01 16:00:00	14.1	4.8	41	90		15	4	57.7	87.4			2019-04-01 16:00:00	17	2.6	70	76		17.8	3.2	50.9	70			2019-04-01 16:00:00	17.4
2019-04-01 17:00:00	17.2	5.1	90	72		16.4	4.5	84.9	78.1			2019-04-01 17:00:00	16.8	3	60	76		16.8	3.1	89.2	75.2			2019-04-01 17:00:00	14.8	5.6	35	82		15.3	4.4	57.4	84.3			2019-04-01 17:00:00	17.1	3.4	50	73		17.7	3.8	50.3	70.2			2019-04-01 17:00:00	17.1
2019-04-01 18:00:00	17.1	5.7	110	71		16.4	4.9	84	79			2019-04-01 18:00:00	16.9	3.3	60	75		16.9	3.3	90.8	75.7			2019-04-01 18:00:00	15	4.9	39	80		15	4.2	56.9	82.3			2019-04-01 18:00:00	17.3	3.4	60	71		17.5	3.9	51.8	69.8			2019-04-01 18:00:00	17
2019-04-01 19:00:00	17.1	4.6	100	71		16.7	4.4	102.4	71.8			2019-04-01 19:00:00	16.8	4.2	50	75		16.7	3.6	93.8	74.6			2019-04-01 19:00:00	15	4.5	40	81		14.9	3.8	53.8	80.8			2019-04-01 19:00:00	17.4	3.4	60	70		17.1	3.8	49.1	69.9			2019-04-01 19:00:00	17
2019-04-01 20:00:00	17.3	5.2	110	68		16.6	4.9	103.4	71.6			2019-04-01 20:00:00	16.7	3.6	60	75		16.8	3.3	93.2	72.1			2019-04-01 20:00:00	14.9	5.5	47	81		14.7	3.5	53.9	80.7			2019-04-01 20:00:00	17.4	2.2	70	71		17.1	2.6	73.8	70.3			2019-04-01 20:00:00	17.1
2019-04-01 21:00:00	17.4	3.7	130	68		16.7	4.1	107.2	71.6			2019-04-01 21:00:00	16.9	3.7	60	74		16.9	3.3	91.4	71.6			2019-04-01 21:00:00	14.9	3.9	50	81		14.8	4.3	54.6	80.4			2019-04-01 21:00:00	17.5	2.4	70	71		17.1	2.8	69.4	70.9			2019-04-01 21:00:00	16.9
2019-04-01 22:00:00	17.5	3.8	130	68		16.7	3.8	103.5	71.2			2019-04-01 22:00:00	16.6	3.7	60	77		17	3.3	90.6	69.5			2019-04-01 22:00:00	15.1	4.3	52	82		14.7	3.3	59.3	82			2019-04-01 22:00:00	17.7	2.3	60	71		17	2.4	82.5	72			2019-04-01 22:00:00	16.5
2019-04-01 23:00:00	17	3.9	110	72		17	3.8	96.8	70.7			2019-04-01 23:00:00	16.8	3.6	60	77		17.1	3.3	80.8	71.1			2019-04-01 23:00:00	15.1	3.2	53	83		15	4.1	56.8	80.1			2019-04-01 23:00:00	17.4	2	60	72		17.1	2	79.1	72.9			2019-04-01 23:00:00	16.5
2019-04-02	17.2	5.1	80	74		17.1	1.9	96	71.8			2019-04-02	17.3	4	60	75		17.2	3.4	72.3	72.4			2019-04-02	15.4	2.9	50	82		15.1	3.2	57.9	82.6			2019-04-02	17.3	1.8	100	74		17.2	1.9	97.6	73.5			2019-04-02	16.7
2019-04-02 01:00:00	17.6	5.5	100	72		17.4	4.3	87.7	71.4			2019-04-02 01:00:00	17.7	4.3	60	74		17.5	2.3	61.2	71.9			2019-04-02 01:00:00	15.5	2.3	64	82		15.2	3.1	62.2	83.9			2019-04-02 01:00:00	17.4	1.1	60	75		17.3	1.2	121.9	76.1			2019-04-02 01:00:00	16.7
2019-04-02 02:00:00	18	5	80	71		17.7	4.2	84.5	72.4			2019-04-02 02:00:00	18	4.3	50	73		17.8	3.6	50.5	72.6			2019-04-02 02:00:00	15.9	1.5	69	82		15.5	1.9	67	83.9			2019-04-02 02:00:00	17.6	1.2	60	75		17.3	1	91.3	76.4			2019-04-02 02:00:00	16.7
2019-04-02 03:00:00	18.1	4.8	80	72		17.9	4.5	76.9	72.4			2019-04-02 03:00:00	18.1	4.7	60	74		17.9	3.9	48.2	73.5			2019-04-02 03:00:00	16.1	1.7	58	82		15.8	1.3	69.2	84.2			2019-04-02 03:00:00	17.8	0.4	60	75		17.4	0.5	88.6	76.6			2019-04-02 03:00:00	16.6
2019-04-02 04:00:00	17.9	5.4	100	74		17.8	4.3	76.2	75.6			2019-04-02 04:00:00	18	3.9	60	76		17.9	3.3	45.1	75.7			2019-04-02 04:00:00	16.3	1.3	59	83		16	1.3	68.3	84.4			2019-04-02 04:00:00	17.7	0.3	70	76		17.6	0.4	97.6	76.6			2019-04-02 04:00:00	16.9
2019-04-02 05:00:00	17.9	4.3	100	77		17.8	3.9	71.6	78.4			2019-04-02 05:00:00	18.2	3.9	50	77		18	3.2	46.4	78			2019-04-02 05:00:00	16.1	2.2	74	85		16.1	1.2	67.1	85			2019-04-02 05:00:00	17.9	1.4	90	76		17.8	1.1	123.7	76.4			2019-04-02 05:00:00	16.7
2019-04-02 06:00:00	18	5.5	70	78		17.8	4.6	69.2	81.5			2019-04-02 06:00:00	18.2	4.2	60	80		18.1	2.7	51.9	80.4			2019-04-02 06:00:00	16.3	1.9	69	86		16.2	1.2	71.5	87.5			2019-04-02 06:00:00	18.1	1.6	80	76		17.9	1.3	108.1	77.7			2019-04-02 06:00:00	16.7
2019-04-02 07:00:00	18.5	4.5	90	78		18.1	4.2	66	81.3			2019-04-02 07:00:00	18.5	4.3	60	80		18.4	4.1	52.2	80.8			2019-04-02 07:00:00	16.6	1.6	58	86		16.4	1	66.4	90			2019-04-02 07:00:00	18.6	1.6	90	77		18.2	1.5	97.5	77.4			2019-04-02 07:00:00	17
2019-04-02 08:00:00	18.9	5.4	100	77		18.6	4.8	70.6	80.9			2019-04-02 08:00:00	19	4.2	60	78		18.9	3.8	48.3	79.6			2019-04-02 08:00:00	17	2.2	92	85		17.2	1.2	71.5	87.5			2019-04-02 08:00:00	19.2	0.9	140	76		19	0.9	85.8	76.3			2019-04-02 08:00:00	18.3
2019-04-02 09:00:00	19.3	5	80	76		19.5	4.5	66.3	78.2			2019-04-02 09:00:00	19.4	3.6	50	78		19.7	3.4	42.5	77.4			2019-04-02 09:00:00	17.5	1.1	94	85		18.9	1.1	68.9	77.3			2019-04-02 09:00:00	19.9	0.5	90	75		20.3	0.4	102.6	72.3			2019-04-02 09:00:00	19.1
2019-04-02 10:00:00	19.5	4.5	80	76		19.7	4.2	61.6	79.4			2019-04-02 10:00:00	19.6	3	60	77		20.2	3	47.2	75.8			2019-04-02 10:00:00	17.9	1	121	85		19.7	0.5	102.4	74.5			2019-04-02 10:00:00	20.6	1.3	80	74		21.2	1.4	124.3	71.3			2019-04-02 10:00:00	20.1
2019-04-02 11:00:00	19.6	5.4	80	78		20.8	3.9	61	75.5			2019-04-02 11:00:00	20.2	2	50	78		21.4	2.2	45.6	71.3			2019-04-02 11:00:00	19.2	1.4	87	80		20.6	0.6	30.5	72.3			2019-04-02 11:00:00	21.8	0.6	80	73		22.5	0.7	130.6	68			2019-04-02 11:00:00	21.6
2019-04-02 12:00:00	20.4	3.2	100	76		21.8	3.2	90.1	70.7			2019-04-02 12:00:00	20.7	3	60	77		22.2	2.9	45.1	66.7			2019-04-02 12:00:00	20.3	1.3	72	79		21.3	1.4	45.2	70.2			2019-04-02 12:00:00	23.6	0	0	68		23.9	0.8	203.4	65.8			2019-04-02 12:00:00	22.1
2019-04-02 13:00:00	21.5	3.1	80	73		22.4	3.2	54.3	70.8			2019-04-02 13:00:00	21.9	2.1	50	72		22.2	2.3	40.3	70.4			2019-04-02 13:00:00	20.4	0.9	111	78		22.1	0.8	47.9	68.8			2019-04-02 13:00:00	23.3	0.5	260	67		24.3	0.7	225.9	65.3			2019-04-02 13:00:00	23.1
2019-04-02 14:00:00	22	2.5	90	71		23.5	2.9	111.9	63.2			2019-04-02 14:00:00	22.4	1.8	50	70		23.8	1.8	78.1	64.6			2019-04-02 14:00:00	21	0.6	130	78		22.5	0.5	336.2	67.7			2019-04-02 14:00:00	23.2	0.7	180	68		24.3	0.9	231.5	62.9			2019-04-02 14:00:00	22.6
2019-04-02 15:00:00	21.9	1.4	80	71		23.3	1.6	110.9	63.2			2019-04-02 15:00:00	21.8	0.8	60	73		23.5	1.1	92.8	64.5			2019-04-02 15:00:00	20.9	0.9	229	77		22.2	1.2	311.3	69.4			2019-04-02 15:00:00	22.6	1.6	280	70		24	1.9	228.6	63.5			2019-04-02 15:00:00	22.5
2019-04-02 16:00:00	22.1	1.6	160	69		22.8	1.6	84.1	68.2			2019-04-02 16:00:00	20.7	0.3	360	82		23	0.4	104.2	67.7			2019-04-02 16:00:00	20.6	0.5	245	79		21.7	0.4	264.4	72			2019-04-02 16:00:00	22.3	1.2	290	70		23.6	1.4	220.5	66.1			2019-04-02 16:00:00	22.3
2019-04-02 17:00:00	21.8	1.2	140	71		22.5	1.3	126.9	71.4			2019-04-02 17:00:00	20.1	0.7	210	87		22.5	0.8	100	71.5			2019-04-02 17:00:00	20.1	0.9	221	81		21	0.5	197.8	76.4			2019-04-02 17:00:00	22.1	1.1	300	73		23.1	1.1	261.4	69.1			2019-04-02 17:00:00	20.8
2019-04-02 18:00:00	21	1.5	240	75		21.8	0.8	109.5	73.9			2019-04-02 18:00:00	20.1	0.2	0	86		21.9	0.3	119.2	73.5			2019-04-02 18:00:00	19.7	0.7	211	83		20.2	0.7	147.4	80.9			2019-04-02 18:00:00	20.9	1	330	83		22.1	1.1	204	76.1			2019-04-02 18:00:00	20.2
2019-04-02 19:00:00	20.1	1.4	140	83		21	1.3	80.6	79.6			2019-04-02 19:00:00	19.9	0.6	50	89		20.9	0.5	87	82.4			2019-04-02 19:00:00	19.3	1.3	218	86		19.5	0.3	170.3	86.1			2019-04-02 19:00:00	20.5	0.6	310	85		21.4	0.7	237.7	80.3			2019-04-02 19:00:00	20.3
2019-04-02 20:00:00	20.4	0.7	140	83		20.7	0.8	68.2	81.7			2019-04-02 20:00:00	19.9	0.4	70	90		20.5	0.3	155.9	86			2019-04-02 20:00:00	19.3	0.6	234	86		19.2	0.5	248.2	88.5			2019-04-02 20:00:00	20.5	0.5	320	84		21	0.3	267	82.5			2019-04-02 20:00:00	-999.7
2019-04-02 21:00:00	20.4	1.6	150	83		20.4	1.3	106.9	85.4			2019-04-02 21:00:00	19.7	0	0	90		20.3	0.5	220.2	87.5			2019-04-02 21:00:00	18.3	0.6	183	93		19	0.6	195.6	91.5			2019-04-02 21:00:00	20.3	0	0	85		20.8	0.6	244.7	83.2			2019-04-02 21:00:00	20.3
2019-04-02 22:00:00	20.4	1	330	82		20.2	0.8	304.2	86.5			2019-04-02 22:00:00	19.8	0.7	40	90		19.9	0.9	267.4	89.8			2019-04-02 22:00:00	19.1	0	0	88		18.9	0.7	239	91.8			2019-04-02 22:00:00	20.4	0.8	310	85		20.7	0.8	198.7	84.3			2019-04-02 22:00:00	20.2
2019-04-02 23:00:00	20.3	0.8	280	81		20	0.8	244	86.9			2019-04-02 23:00:00	19.4	0.9	190	90		19.7	1	250.5	89.6			2019-04-02 23:00:00	18.7	0	0	95		18.7	0.5	236.5	93.3			2019-04-02 23:00:00	20.6	1.3	290	84		20.7	1.1	236.8	84.7			2019-04-02 23:00:00	20.3
2019-04-03	20	1	220	84		20	0.9	238.1	86.8			2019-04-03	19.8	1.3	200	90		20	1.1	210.5	89.5			2019-04-03	18.5	0.6	318	96		18.7	0.9	276	91.7			2019-04-03	19.9	1	320	85		20.5	0.9	257.7	83.9			2019-04-03	20
2019-04-03 01:00:00	20.1	0.6	220	85		19.9	0.6	196.5	87.7			2019-04-03 01:00:00	20	1.6	220	89		20	1.3	198.8	89			2019-04-03 01:00:00	17.9	0.2	0	97		18.2	0.5	263.1	93.2			2019-04-03 01:00:00	19.7	1.5	360	84		20	0.5	12.6	84.8			2019-04-03 01:00:00	19.8
2019-04-03 02:00:00	20.4	1.1	270	84		19.9	1.1	220.2	89.1			2019-04-03 02:00:00	19.8	1.4	210	91		19.9	1.2	206	88.7			2019-04-03 02:00:00	17.8	0	0	97		18.3	1.2	267.1	91.1			2019-04-03 02:00:00	19.8	0.2	0	84		19.7	0.3	81.2	85.1			2019-04-03 02:00:00	19.5
2019-04-03 03:00:00	20	1.2	320	84		19.9	1.2	261.9	87.8			2019-04-03 03:00:00	19.7	1.6	260	88		19.8	0.8	210.9	87.8			2019-04-03 03:00:00	17.5	0.6	327	97		17.8	0.9	274.1	90.9			2019-04-03 03:00:00	19.6	0.7	320	84		19.7	0.7	356	85.4			2019-04-03 03:00:00	19.5
2019-04-03 04:00:00	19.6	1.8	290	84		19.4	1.7	227.9	89			2019-04-03 04:00:00	19.1	0.9	230	90		19.4	1	226.6	85.6			2019-04-03 04:00:00	17.1	0	0	98		17.7	0.8	267.6	89.9			2019-04-03 04:00:00	19.3	1.2	330	84		19.5	1.2	16.8	83.9			2019-04-03 04:00:00	19.4
2019-04-03 05:00:00	18.9	1.3	290	87		19	1.3	240.6	89.5			2019-04-03 05:00:00	18.5	1.3	230	92		19.1	1.3	241.7	88.4			2019-04-03 05:00:00	16.7	0.4	322	98		17.3	0.3	299.6	90.1			2019-04-03 05:00:00	18.8	0.3	360	86		19.2	0.4	7.1	84.3			2019-04-03 05:00:00	19
2019-04-03 06:00:00	18.8	1.5	230	90		18.9	1.6	242.5	90.2			2019-04-03 06:00:00	18.5	1.2	220	93		18.9	1.4	208.4	89.4			2019-04-03 06:00:00	16.7	0.2	0	98		17.1	0.6	283.9	93.6			2019-04-03 06:00:00	18.9	0.2	0	87		18.8	0.3	10.5	87.1			2019-04-03 06:00:00	18.6
2019-04-03 07:00:00	19	2.1	230	90		18.8	1.7	243.3	90.8			2019-04-03 07:00:00	18.6	2	210	93		18.9	2	225.1	89.6			2019-04-03 07:00:00	16.9	0	0	98		17.1	0.5	271.9	95.2			2019-04-03 07:00:00	19.2	0.2	0	84		18.9	0.3	15.2	85.5			2019-04-03 07:00:00	18.4
2019-04-03 08:00:00	19.5	1.4	260	89		19.1	1.7	246	89.8			2019-04-03 08:00:00	19	2	220	92		19.1	1.9	234.8	89.7			2019-04-03 08:00:00	17.2	0.5	233	97		17.4	0.8	280.7	92.4			2019-04-03 08:00:00	19.3	0.3	190	86		19.2	0.4	349.2	85.5			2019-04-03 08:00:00	18.5
2019-04-03 09:00:00	20.2	2	230	87		20.5	2	256.5	83.7			2019-04-03 09:00:00	19.8	1.6	220	88		19.8	1.5	251	86.7			2019-04-03 09:00:00	18.4	0.3	236	91		18	0.6	265.3	90			2019-04-03 09:00:00	20	0.1	0	83		19.8	0.1	331.5	83.9			2019-04-03 09:00:00	19.5
2019-04-03 10:00:00	20.5	1.4	250	82		20.3	1.1	267.6	84.5			2019-04-03 10:00:00	20	1.5	220	85		21	1.3	226.3	80.1			2019-04-03 10:00:00	18.3	0.5	228	91		18.9	0.4	279.3	85.7			2019-04-03 10:00:00	20.2	0.2	0	81		19.9	0.3	340.3	84.8			2019-04-03 10:00:00	20.5
2019-04-03 11:00:00	20.7	2.1	250	81		21.4	2.1	258	78.8			2019-04-03 11:00:00	20.7	2.7	220	82		21.5	2.1	235.7	77			2019-04-03 11:00:00	18.4	1.3	226	93		18.9	0.5	278.2	86.6			2019-04-03 11:00:00	20.2	0.1	0	82		20.3	0.2	339	81.7			2019-04-03 11:00:00	20.4
2019-04-03 12:00:00	20.8	1.8	240	80		21.7	2.1	246.4	76.8			2019-04-03 12:00:00	20.6	1.8	230	82		21.3	1.6	224.6	78.4			2019-04-03 12:00:00	18.3	1.8	220	94		19.5	0.8	239.4	83.9			2019-04-03 12:00:00	20.3	0.5	170	82		20.9	0.6	242.8	79			2019-04-03 12:00:00	20.5
2019-04-03 13:00:00	20.3	1.8	260	83		22.3	2.1	264.5	74.6			2019-04-03 13:00:00	20.4	2	220	84		21.2	1.9	237.9	77.7			2019-04-03 13:00:00	18.3	1.2	224	95		19.2	0.5	237.4	84.5			2019-04-03 13:00:00	19.9	0.2	0	87		21.1	0.3	260.6	79.8			2019-04-03 13:00:00	20.5
2019-04-03 14:00:00	20.7	1.7	280	86		21.9	1.8	260.2	78.2			2019-04-03 14:00:00	20.7	1.8	220	83		20.7	1.4	271.1	83.4			2019-04-03 14:00:00	18.4	1	225	94		19.5	0.7	262.6	83.3			2019-04-03 14:00:00	20.3	0.6	140	88		20.4	0.7	3.9	86.2			2019-04-03 14:00:00	20.5
2019-04-03 15:00:00	21.1	1.2	290	86		21.6	1.4	265.1	80.6			2019-04-03 15:00:00	21.8	1.8	250	81		21.2	1.6	258.3	81.3			2019-04-03 15:00:00	19.1	0.8	230	94		19.9	0.7	245.7	82.1			2019-04-03 15:00:00	21.3	0.5	300	82		21	0.6	348.1	84.3			2019-04-03 15:00:00	21
2019-04-03 16:00:00	22.1	1.4	240	80		22	1.6	249.1	78			2019-04-03 16:00:00	21.9	2.2	230	77		21.9	2.2	238.3	77			2019-04-03 16:00:00	19.9	1.3	224	87		19.8	1.4	247.8	84.1			2019-04-03 16:00:00	21.8	1.1	250	79		21.4	1.4	341.2	81.2			2019-04-03 16:00:00	20.6
2019-04-03 17:00:00	22.1	0.2	0	77		21.8	0.3	251	79			2019-04-03 17:00:00	21.9	2	220	77		21.8	1.2	255.3	77.2			2019-04-03 17:00:00	19.6	1.2	227	88		20.2	0.4	220.5	83.6			2019-04-03 17:00:00	20.9	0.5	160	85		21.1	0.6	325	85			2019-04-03 17:00:00	21
2019-04-03 18:00:00	21.8	0.2	0	79		22	0.2	249.4	77.6			2019-04-03 18:00:00	21.6	0.2	0	79		21.8	0.3	219	76.9			2019-04-03 18:00:00	19.5	1.5	219	90		19.7	0.4	249.3	87.2			2019-04-03 18:00:00	20.5	0.4	140	86		20.7	0.2	223.1	87.3			2019-04-03 18:00:00	20.4
2019-04-03 19:00:00	21.6	0	0	79		21.8	0.5	244.7	79.6			2019-04-03 19:00:00	20.6	0	0	85		21.6	0.5	214.8	78.9			2019-04-03 19:00:00	19.1	0.7	212	93		19.5	1.1	196.7	86.4			2019-04-03 19:00:00	20.7	0.3	80	86		20.8	0.3	163	85.7			2019-04-03 19:00:00	20.3
2019-04-03 20:00:00	21.7	1.4	340	79		21.2	1.1	8.8	84.5			2019-04-03 20:00:00	21.1	0.8	30	85		21.3	0.6	283.9	81.7			2019-04-03 20:00:00	19	0	0	93		19.3	1.2	347.3	86.2			2019-04-03 20:00:00	20.6	1.5	70	86		20.8	0.9	189.4	85.2			2019-04-03 20:00:00	20.2
2019-04-03 21:00:00	21.4	1.1	100	81		21.1	0.5	64.7	84.3			2019-04-03 21:00:00	20.8	0.1	0	86		20.9	0.2	263.5	84.3			2019-04-03 21:00:00	19.1	0.3	17	94		19.2	0.4	187.4	87.5			2019-04-03 21:00:00	20.9	2.2	10	83		20.7	1	25.1	84.8			2019-04-03 21:00:00	19.8
2019-04-03 22:00:00	21.4	1	190	81		21	1.1	177.8	84.2			2019-04-03 22:00:00	21	0.9	70	85		20.8	0.7	252.5	85.2			2019-04-03 22:00:00	18.7	0.5	163	96		18.8	0.6	93.8	90.8			2019-04-03 22:00:00	20.5	1.4	100	86		20.5	1.3	65.3	86.9			2019-04-03 22:00:00	19.9
2019-04-03 23:00:00	21.3	2	100	80		20.8	2.1	69.3	83.9			2019-04-03 23:00:00	21	2	60	85		20.8	1.6	9.6	88.7			2019-04-03 23:00:00	18.5	0	0	96		18.4	0.9	16	94.5			2019-04-03 23:00:00	20.3	2	10	87		20.2	1.9	42.7	85.9			2019-04-03 23:00:00	19.7
2019-04-04	21.1	3.1	80	82		20.6	2.6	77.4	90.3			2019-04-04	21.1	2.1	70	84		20.7	1.6	88.6	86.5			2019-04-04	18.1	0.3	38	98		18.2	1.2	46.4	97.2			2019-04-04	20	0.6	10	87		19.8	0.7	96.6	89			2019-04-04	19.4
2019-04-04 01:00:00	21.1	3.1	110	84		20.5	3	104.5	84.9			2019-04-04 01:00:00	21	2.4	50	86		20.5	0.1	171.4	87.4			2019-04-04 01:00:00	18.5	1.6	48	96		18.4	1.3	51.1	97.8			2019-04-04 01:00:00	19.6	0	0	88		19.6	0.6	87.9	88.8			2019-04-04 01:00:00	19
2019-04-04 02:00:00	21.4	3.5	80	83		21	2.9	106.2	87.9			2019-04-04 02:00:00	21	3.5	60	86		20.9	1.2	327	83.8			2019-04-04 02:00:00	18.9	2.1	30	94		18.4	1.3	23.9	96.2			2019-04-04 02:00:00	20	0.8	360	88		19.5	0.9	76.4	90.3			2019-04-04 02:00:00	18.8
2019-04-04 03:00:00	21.6	3.6	80	82		20.9	2.8	135.4	88.5			2019-04-04 03:00:00	21.4	3	70	85		20.9	2.1	16	83.3			2019-04-04 03:00:00	19	1.3	72	96		19	1.1	33.2	98.2			2019-04-04 03:00:00	20.2	0.7	100	88		19.7	0.7	149.4	90.7			2019-04-04 03:00:00	19.1
2019-04-04 04:00:00	21.4	3.7	80	83		20.8	3.2	77.1	93			2019-04-04 04:00:00	21.2	2.9	70	86		20.6	1.8	53.9	83.4			2019-04-04 04:00:00	19.2	1.8	64	96		19.2	0.5	19.5	97.8			2019-04-04 04:00:00	19.6	0.3	110	88		19.9	0.4	110.9	88.9			2019-04-04 04:00:00	-999.7
2019-04-04 05:00:00	21.4	4.1	80	84		21	3.4	77.6	88.6			2019-04-04 05:00:00	21.2	3.2	50	87		20.8	2.3	24.9	90.7			2019-04-04 05:00:00	18.6	0.3	184	97		19.2	0.6	261.4	99.2			2019-04-04 05:00:00	19.4	0.2	0	88		19.8	0.3	162.5	88.4			2019-04-04 05:00:00	19.3
2019-04-04 06:00:00	21.6	2.8	80	84		20.9	2.8	72.7	91.6			2019-04-04 06:00:00	21.3	2.8	60	87		20.9	1.8	51.2	91.2			2019-04-04 06:00:00	18.9	0.4	124	97		19.2	1.2	269.4	94.7			2019-04-04 06:00:00	19.3	0.7	120	88		19.6	0.7	172.6	89			2019-04-04 06:00:00	19.3
2019-04-04 07:00:00	22.3	3.6	80	83		22.2	2.4	73.2	87.1			2019-04-04 07:00:00	21.9	0.8	80	86		22.1	0.8	73.3	85.8			2019-04-04 07:00:00	18.9	0.5	159	97		19.5	0.3	181.2	90.7			2019-04-04 07:00:00	19.8	0.9	120	87		20	1	182.8	89.9			2019-04-04 07:00:00	19.3
2019-04-04 08:00:00	23.2	2.4	80	81		23.4	1.4	115.1	80.7			2019-04-04 08:00:00	23.2	2	60	82		22.9	1.5	166.3	81.4			2019-04-04 08:00:00	20.4	0.3	215	89		20.7	0.7	251	83.2			2019-04-04 08:00:00	20.9	0.5	140	83		21.1	0.4	33.1	83.3			2019-04-04 08:00:00	20.5
2019-04-04 09:00:00	24.9	1.9	90	75		24.7	1.2	226.5	76			2019-04-04 09:00:00	24.1	1.1	70	77		24.2	1.3	165	69.1			2019-04-04 09:00:00	22.7	0.5	197	73		21.9	1.6	289.2	79.1			2019-04-04 09:00:00	22.4	0	0	80		22.6	1	18.9	78.3			2019-04-04 09:00:00	23.3
2019-04-04 10:00:00	26.5	1.2	130	68		26.2	1.3	217.3	62.2			2019-04-04 10:00:00	26	0.3	220	70		25.8	0.5	177.7	62.2			2019-04-04 10:00:00	24	0.6	204	67		23.8	1.5	239.4	71.5			2019-04-04 10:00:00	24	1.5	290	76		24.6	1.8	278.3	71.6			2019-04-04 10:00:00	25
2019-04-04 11:00:00	28.3	0.7	210	60		27.7	0.9	210.4	57			2019-04-04 11:00:00	27.5	0.9	230	63		27.5	0.8	200.4	58.6			2019-04-04 11:00:00	24.1	0.9	233	69		24.6	0.5	259.9	65.9			2019-04-04 11:00:00	25.2	1.7	260	73		25.1	1.9	283.4	72.3			2019-04-04 11:00:00	24.9
2019-04-04 12:00:00	28.7	1.1	210	56		26.8	1.4	329.7	69.7			2019-04-04 12:00:00	28.2	3	230	55		28.4	2.8	255.3	56			2019-04-04 12:00:00	25	0.8	243	67		24.8	1.5	278.9	73.9			2019-04-04 12:00:00	26	1.4	280	71		24.4	1.8	312.6	76.2			2019-04-04 12:00:00	25
2019-04-04 13:00:00	30.3	1.1	300	52		27.6	1.5	307.2	64.6			2019-04-04 13:00:00	28.6	1.5	240	56		26.8	1.6	330.1	71.9			2019-04-04 13:00:00	25.9	1	238	65		25.3	1.1	293.5	69.8			2019-04-04 13:00:00	26.4	2.1	290	68		24.6	2.4	316.5	74.3			2019-04-04 13:00:00	23.9
2019-04-04 14:00:00	28.5	0.8	320	62		26.7	1.1	331.2	69.3			2019-04-04 14:00:00	28.7	2	240	58		27.6	1.9	304.3	65.2			2019-04-04 14:00:00	25.5	0.2	0	69		24.9	1	300.5	75.3			2019-04-04 14:00:00	26.1	0.9	320	73		24.3	1.1	317.1	77.2			2019-04-04 14:00:00	22.6
2019-04-04 15:00:00	28.9	0.5	310	60		26.7	0.8	326.5	68.9			2019-04-04 15:00:00	28.3	1.9	250	59		27.1	1.9	315	67.2			2019-04-04 15:00:00	25	0.3	7	74		24.7	1.6	303.9	75.1			2019-04-04 15:00:00	25.4	1.8	290	76		23.7	2.1	317.6	80.7			2019-04-04 15:00:00	22.2
2019-04-04 16:00:00	27.4	1.5	310	64		26.1	1.9	316.1	70.6			2019-04-04 16:00:00	27	1.8	270	68		26.1	2	314.4	69.9			2019-04-04 16:00:00	23	0.8	327	85		23.5	1.6	305.5	79.3			2019-04-04 16:00:00	23.4	1.7	330	82		22.4	2	322.2	84.3			2019-04-04 16:00:00	21.4
2019-04-04 17:00:00	25.3	2.9	290	68		24.7	3	311.6	74.2			2019-04-04 17:00:00	24.8	1.9	280	74		24.6	2	317	75.8			2019-04-04 17:00:00	21.5	1	326	93		21.9	1.5	303.2	83.3			2019-04-04 17:00:00	21	2.5	340	87		21	2.7	330.3	85.6			2019-04-04 17:00:00	20.4
2019-04-04 18:00:00	24.1	1.2	310	76		23.3	1.6	304.7	83.4			2019-04-04 18:00:00	22.7	2.2	290	84		22.7	2	314.3	85.1			2019-04-04 18:00:00	18.8	1.2	326	98		19.8	1	307.5	93.4			2019-04-04 18:00:00	20.1	1.6	350	87		20	1.8	349.8	86.5			2019-04-04 18:00:00	19.7
2019-04-04 19:00:00	22.6	2.4	290	79		21.9	2.7	293.8	88.8			2019-04-04 19:00:00	21.4	1.6	270	87		21.7	1.7	294.3	86.3			2019-04-04 19:00:00	18.4	0.6	324	98		18.9	1	296	95.5			2019-04-04 19:00:00	20	1.2	350	87		19.9	1.4	12.8	86.8			2019-04-04 19:00:00	-999.7
2019-04-04 20:00:00	22	2.3	260	80		21.6	2.3	287.1	87.1			2019-04-04 20:00:00	21.2	2.4	220	87		21.2	1.7	292.8	88			2019-04-04 20:00:00	18.2	0.5	322	99		18.8	0.7	281.3	95.1			2019-04-04 20:00:00	20	1.5	20	87		20	1.4	11.5	86.6			2019-04-04 20:00:00	19.4
2019-04-04 21:00:00	21.4	1.7	240	84		21.6	2	248.2	87.5			2019-04-04 21:00:00	20.7	1.5	220	91		21.2	1.5	252.2	88.3			2019-04-04 21:00:00	18.6	0	0	99		18.9	1	282.7	93.3			2019-04-04 21:00:00	20	0.3	10	89		20	0.4	1.3	87.6			2019-04-04 21:00:00	19.5
2019-04-04 22:00:00	21.4	1.8	220	84		21.5	1.4	234.8	86			2019-04-04 22:00:00	20.6	2.1	230	91		21.2	1.4	223	87.5			2019-04-04 22:00:00	18.6	0.9	222	98		19	0.2	257.2	93.2			2019-04-04 22:00:00	20.2	0.8	170	89		20.2	0.6	27.1	88.9			2019-04-04 22:00:00	19.5
2019-04-04 23:00:00	21.4	1.1	220	84		21.1	1.5	235.1	87.5			2019-04-04 23:00:00	20.8	1.8	230	89		21	1.6	221.7	88.5			2019-04-04 23:00:00	18.7	0.5	223	97		19	0.5	257.1	92			2019-04-04 23:00:00	20.1	0.1	0	89		20.2	0.1	314.7	90.2			2019-04-04 23:00:00	19.4
2019-04-05	21.8	0.3	999.9	82		21.1	0.5	243	86.3			2019-04-05	21	0.9	250	87		21.2	0.9	229.6	86.3			2019-04-05	18.9	0.4	232	95		19	0.6	294	92.3			2019-04-05	20.2	0	0	88		20.1	0.3	269.5	90.1			2019-04-05	19.5
2019-04-05 01:00:00	21.6	0.8	330	80		21.1	1.1	243	87.6			2019-04-05 01:00:00	21	1.6	240	86		21.1	1.3	228.4	85.5			2019-04-05 01:00:00	18.8	0	0	96		18.9	0.9	276.2	92.2			2019-04-05 01:00:00	20.4	0.4	270	86		20	0.4	304.3	88.9			2019-04-05 01:00:00	19.6
2019-04-05 02:00:00	21.4	0.3	999.9	81		20.7	0.5	294.5	89.8			2019-04-05 02:00:00	20.9	1.4	230	87		21.1	1.2	234.1	85.2			2019-04-05 02:00:00	18.5	0.8	213	98		18.8	0.5	267.6	94.1			2019-04-05 02:00:00	20.6	0	0	86		20.2	0.4	317.2	87.8			2019-04-05 02:00:00	19.5
2019-04-05 03:00:00	21.2	0.6	300	81		20.6	0.8	294.1	90.4			2019-04-05 03:00:00	20.9	1.2	230	86		20.9	1.4	218.3	85.2			2019-04-05 03:00:00	18.5	0.7	204	98		18.7	0.8	280.2	93.9			2019-04-05 03:00:00	20.2	0.7	120	88		20.2	0.6	295.6	88.4			2019-04-05 03:00:00	19.5
2019-04-05 04:00:00	20.3	0.3	130	86		20.4	0.5	291.9	91.3			2019-04-05 04:00:00	20.2	0.8	270	91		20.8	0.8	233	84.6			2019-04-05 04:00:00	18.4	0.5	210	98		18.8	0.2	287.9	94.3			2019-04-05 04:00:00	20	0.1	0	89		20.2	0.1	333.4	88.6			2019-04-05 04:00:00	19.7
2019-04-05 05:00:00	20.3	0.3	210	87		20	0.5	311.8	93.2			2019-04-05 05:00:00	20.2	0.7	280	91		20.8	0.8	236.2	86			2019-04-05 05:00:00	18.5	0	0	98		18.8	0.6	306.2	94.3			2019-04-05 05:00:00	20	0.7	50	89		20	0.8	352.5	89.2			2019-04-05 05:00:00	19.9
2019-04-05 06:00:00	20.5	0.7	999.9	85		20	0.9	297.8	90.9			2019-04-05 06:00:00	20.3	0.6	350	89		20.1	0.7	319.4	92.9			2019-04-05 06:00:00	18.2	0	0	98		18.6	0.7	305.4	95.2			2019-04-05 06:00:00	20	0.2	0	89		20	0.3	349.3	89.2			2019-04-05 06:00:00	19.9
2019-04-05 07:00:00	20.7	0.3	260	84		20	0.5	291.7	92.1			2019-04-05 07:00:00	20.3	0.7	290	89		21	0.7	236.4	86.9			2019-04-05 07:00:00	18.2	0	0	98		18.9	0.7	291.2	91.8			2019-04-05 07:00:00	20.2	1.1	20	87		20.4	0.7	324.5	86.3			2019-04-05 07:00:00	19.9
2019-04-05 08:00:00	20.6	0.4	999.9	83		20.3	0.6	296.7	90.2			2019-04-05 08:00:00	20.3	1.2	250	89		21.8	1.2	212.9	79.3			2019-04-05 08:00:00	18.3	0	0	99		19.1	0.2	259.9	90.4			2019-04-05 08:00:00	20.3	1.7	40	86		20.9	1.3	287.3	82.7			2019-04-05 08:00:00	19.9
2019-04-05 09:00:00	20.2	0.4	310	87		20.7	0.5	309	88.1			2019-04-05 09:00:00	20.1	0.4	280	91		22.5	0.6	243.4	75.1			2019-04-05 09:00:00	18.3	0	0	99		19.6	0.2	208.7	89.2			2019-04-05 09:00:00	20.3	1.2	360	86		21.5	1.1	280.5	80.7			2019-04-05 09:00:00	19.8
2019-04-05 10:00:00	20.9	0.5	999.9	89		21.2	0.7	310.5	85.7			2019-04-05 10:00:00	20.1	0.7	230	91		22.2	0.9	277.1	78.7			2019-04-05 10:00:00	18.3	0.5	4	98		20.5	0.8	332.1	82.7			2019-04-05 10:00:00	20.8	0.8	30	83		22.3	0.9	302.4	75.3			2019-04-05 10:00:00	20.3
2019-04-05 11:00:00	22.3	1.4	290	84		21.3	1.2	287.9	86.7			2019-04-05 11:00:00	21.4	1.1	220	87		21	1.2	340.5	87.7			2019-04-05 11:00:00	19	0	0	98		21.5	0.4	246.3	79			2019-04-05 11:00:00	22.5	0.3	50	79		23.3	0.4	281.4	71.9			2019-04-05 11:00:00	20.8
2019-04-05 12:00:00	23.1	1.4	240	77		23	1.8	244.4	79.3			2019-04-05 12:00:00	22.5	1.6	210	79		22.1	1.6	340	82.3			2019-04-05 12:00:00	21.4	0.5	172	84		23	0.8	221	72.7			2019-04-05 12:00:00	25.1	0.4	130	71		24.6	0.5	289	69.5			2019-04-05 12:00:00	22.3
2019-04-05 13:00:00	24.5	0.8	230	71		23.4	1.1	310.5	75.6			2019-04-05 13:00:00	23.9	1.6	220	73		22.9	1.8	338.9	78.4			2019-04-05 13:00:00	21.8	0.6	201	82		23.3	0.8	211.2	74.2			2019-04-05 13:00:00	24.1	0.4	10	70		24.6	0.5	309.7	68.8			2019-04-05 13:00:00	24.4
2019-04-05 14:00:00	24.3	1.2	310	67		24.2	1.5	327	65.6			2019-04-05 14:00:00	24.9	2.1	20	66		24.1	2.1	336.5	68.1			2019-04-05 14:00:00	22.4	0.6	34	74		24.5	1.1	300.6	67.9			2019-04-05 14:00:00	25.3	1.5	360	67		24.9	1.8	314.2	65.1			2019-04-05 14:00:00	-999.7
2019-04-05 15:00:00	24.7	1	310	63		23.8	1.3	323.9	67.3			2019-04-05 15:00:00	23.9	2.1	30	63		24.1	2	344.4	66.6			2019-04-05 15:00:00	21.6	0.9	5	76		24.1	1.3	298.9	66			2019-04-05 15:00:00	25.3	1.6	350	65		25	1.9	329.5	64.5			2019-04-05 15:00:00	24.4
2019-04-05 16:00:00	23.3	3.9	110	65		23.2	1.4	340.6	69.2			2019-04-05 16:00:00	24.8	1.7	50	58		23.7	1.9	360	65.7			2019-04-05 16:00:00	22.1	1.7	24	74		23.8	0.6	294.4	69			2019-04-05 16:00:00	25.1	2.2	20	64		25.3	2.2	20.6	60.5			2019-04-05 16:00:00	24.5
2019-04-05 17:00:00	22.3	3	80	66		22.5	2.4	88.7	69.6			2019-04-05 17:00:00	22.7	2.2	60	66		23.8	2	52.8	61.2			2019-04-05 17:00:00	21.4	1.3	14	75		23.4	0.7	281.2	69.4			2019-04-05 17:00:00	24.1	2.5	30	66		25.2	1.9	31.4	60.4			2019-04-05 17:00:00	24.2
2019-04-05 18:00:00	21.3	5	100	67		21.3	3.1	80.5	72.2			2019-04-05 18:00:00	21.5	2.4	60	70		22.6	2	110.1	67.6			2019-04-05 18:00:00	20.5	1	15	81		21.6	0.9	67.5	78			2019-04-05 18:00:00	22.7	1.9	30	70		23.8	2.1	76.8	66.3			2019-04-05 18:00:00	23.2
2019-04-05 19:00:00	20.8	4	100	71		20.7	2.8	84	72.3			2019-04-05 19:00:00	20.9	2.3	70	72		21.4	1.9	75.7	72.2			2019-04-05 19:00:00	19.1	1.1	70	83		20.3	1.3	69.4	77.8			2019-04-05 19:00:00	21.8	1.3	60	73		22.6	1.6	68.4	72.3			2019-04-05 19:00:00	22.8
2019-04-05 20:00:00	20.6	3.4	100	73		20.1	2.8	83.6	78.4			2019-04-05 20:00:00	20.6	2.9	70	73		20.8	2	61.3	73.1			2019-04-05 20:00:00	18.2	0.3	121	88		19.4	1.5	90.5	79.8			2019-04-05 20:00:00	21.4	2.2	50	75		21.8	1.9	67.7	74.6			2019-04-05 20:00:00	22.3
2019-04-05 21:00:00	20.4	3	100	74		19.6	2.8	90.6	82.3			2019-04-05 21:00:00	20.5	2.3	60	75		20.2	1.7	64.9	77.6			2019-04-05 21:00:00	17.8	0.8	123	88		18.7	1.4	87.5	87.9			2019-04-05 21:00:00	20.7	1.3	80	78		21	1.5	67.7	77.8			2019-04-05 21:00:00	21.7
2019-04-05 22:00:00	20.2	2.8	100	75		19.4	2.5	77.5	83.8			2019-04-05 22:00:00	20.2	1.4	50	75		20.1	1.2	53	77.7			2019-04-05 22:00:00	17.5	1	103	89		18.2	0.9	92.6	89			2019-04-05 22:00:00	20.1	1.6	80	79		20.2	1.5	63.5	79.7			2019-04-05 22:00:00	21.3
2019-04-05 23:00:00	20.2	3.7	100	75		19.4	2.3	78.4	84			2019-04-05 23:00:00	20.1	1	60	75		19.8	0.9	43.2	81.3			2019-04-05 23:00:00	17.2	0.8	120	90		17.7	0.6	79.9	87.4			2019-04-05 23:00:00	19.8	2.3	90	79		20.2	1.5	34.2	79.4			2019-04-05 23:00:00	-999.7
2019-04-06	20.1	3.1	100	75		19.2	2.8	85.5	84.1			2019-04-06	19.9	1.5	60	77		19.6	0.7	66.8	81.5			2019-04-06	16.8	0.6	176	93		17.5	0.9	88.1	87.3			2019-04-06	19.4	1.9	80	82		20	1.4	85	80			2019-04-06	20.5
2019-04-06 01:00:00	20.1	1.9	100	75		19	1.8	88.2	84.3			2019-04-06 01:00:00	19.6	1.4	50	79		19.4	1	53.4	81.4			2019-04-06 01:00:00	16.7	0.4	176	94		17.1	0.7	82.6	90.5			2019-04-06 01:00:00	19	1.4	70	82		19	1.4	73.7	83.3			2019-04-06 01:00:00	20.1
2019-04-06 02:00:00	19.9	2.3	100	75		18.9	1.8	90.2	83.1			2019-04-06 02:00:00	19.5	1.6	60	80		19.1	1.2	46.1	83.1			2019-04-06 02:00:00	16.7	0.3	204	94		17	0.5	82.9	92			2019-04-06 02:00:00	18.7	1.7	80	84		18.9	1.5	79.2	83.4			2019-04-06 02:00:00	19.5
2019-04-06 03:00:00	19.8	1.8	110	76		18.7	1.8	100.9	85.9			2019-04-06 03:00:00	19.1	0.9	80	83		18.9	0.5	20.7	83			2019-04-06 03:00:00	16.9	0	0	95		16.8	0.6	75.6	92.8			2019-04-06 03:00:00	19.1	0.7	70	83		18.9	0.8	81.4	84.4			2019-04-06 03:00:00	19.4
2019-04-06 04:00:00	19.3	0.9	110	79		18.5	1.1	100.1	86.2			2019-04-06 04:00:00	18.7	0.4	50	84		18.8	0.4	329.6	84			2019-04-06 04:00:00	17	0.4	194	94		17.2	0.3	127.9	91.2			2019-04-06 04:00:00	19.3	1.4	90	82		18.7	1.1	90.4	85.8			2019-04-06 04:00:00	19.5
2019-04-06 05:00:00	18.8	1.1	180	81		18.5	0.8	119.7	86.2			2019-04-06 05:00:00	18.1	0.1	0	88		18.6	0.2	316.4	84.6			2019-04-06 05:00:00	16.8	0.5	215	95		17	0.1	124	92.7			2019-04-06 05:00:00	19.6	0.7	80	82		18.6	0.6	125.6	87.3			2019-04-06 05:00:00	19.7
2019-04-06 06:00:00	18.6	0.8	120	83		18.5	0.9	134.8	86.3			2019-04-06 06:00:00	17.8	1	210	90		18.6	0.9	296.5	85.3			2019-04-06 06:00:00	17	1.1	209	94		17.4	0.4	178.4	90.4			2019-04-06 06:00:00	19	0.5	90	84		18.6	0.5	180.7	88.2			2019-04-06 06:00:00	19.5
2019-04-06 07:00:00	20	0.4	180	81		19.9	0.4	124.4	82.7			2019-04-06 07:00:00	18.8	0	0	89		19.8	0.1	15.6	82.5			2019-04-06 07:00:00	18.9	0.9	195	90		19.3	0.2	166.5	79.6			2019-04-06 07:00:00	20.2	1.1	90	83		20	0.8	241.8	88.5			2019-04-06 07:00:00	20.2
2019-04-06 08:00:00	22.4	0.3	230	75		21.9	0.2	154.1	75.6			2019-04-06 08:00:00	20.7	0.2	0	82		21.6	0.2	122.8	76.2			2019-04-06 08:00:00	21	0.8	47	82		21.8	0.6	237.5	73.1			2019-04-06 08:00:00	22.6	0.1	0	77		22	0.1	227.8	80.6			2019-04-06 08:00:00	22.7
2019-04-06 09:00:00	25.2	0.6	110	67		23.9	0.7	272.1	65.5			2019-04-06 09:00:00	23.5	0.5	90	71		23.9	0.5	172	67.6			2019-04-06 09:00:00	23	0.7	9	73		23	1.1	247.4	71.5			2019-04-06 09:00:00	24.1	0.9	330	72		23.6	1.1	289.2	73.4			2019-04-06 09:00:00	25
2019-04-06 10:00:00	27.3	0.3	340	60		26	0.4	267	61.8			2019-04-06 10:00:00	25.4	0.6	230	62		26.1	0.8	198.4	57.1			2019-04-06 10:00:00	24.4	0	0	68		24.6	1.2	303.4	62.8			2019-04-06 10:00:00	25.3	1.5	300	68		25	1.8	284.9	67			2019-04-06 10:00:00	26.2
2019-04-06 11:00:00	29.1	0.5	260	-9997		27.7	0.7	247.2	51.4			2019-04-06 11:00:00	27.5	1.2	250	58		27.5	1.2	236	54.5			2019-04-06 11:00:00	25.7	0.4	293	62		25.8	1.5	274.8	59.7			2019-04-06 11:00:00	26.5	2.8	290	62		25.4	2.9	268.9	65.6			2019-04-06 11:00:00	25.4
2019-04-06 12:00:00	28.8	0.8	350	-9997		27.9	0.9	285.3	58			2019-04-06 12:00:00	27.1	1	340	59		27.5	1.1	302.8	63.8			2019-04-06 12:00:00	23.9	0.5	320	69		25.4	0.9	281.7	65.2			2019-04-06 12:00:00	25.9	2.3	300	66		25.2	2.5	279.7	66.9			2019-04-06 12:00:00	24.4
2019-04-06 13:00:00	27.7	1.6	290	-9997		27.5	2	320.6	60.5			2019-04-06 13:00:00	25.9	1.6	250	62		27.7	1.9	292.8	58.8			2019-04-06 13:00:00	23.6	0.6	254	68		24.3	2.1	293.5	71.6			2019-04-06 13:00:00	24.5	1.2	270	68		24.7	1.5	266	66.8			2019-04-06 13:00:00	23.7
2019-04-06 14:00:00	26.5	0.2	0	54		26.8	0.4	330.6	57.8			2019-04-06 14:00:00	25.6	0.9	270	61		26.6	1	290.5	63.9			2019-04-06 14:00:00	22.6	0.7	240	70		23.8	1.3	263	70.1			2019-04-06 14:00:00	23.5	1.1	290	73		24.3	1.4	259.8	67.5			2019-04-06 14:00:00	23.4
2019-04-06 15:00:00	26.3	0.3	240	-9997		25.7	0.5	296.8	62.4			2019-04-06 15:00:00	25.2	2.3	230	62		25	1.7	312.3	69.5			2019-04-06 15:00:00	22.2	1	231	73		23.6	1.3	237	69.1			2019-04-06 15:00:00	23.6	1	270	71		24.3	1.2	248.1	66.8			2019-04-06 15:00:00	24.2
2019-04-06 16:00:00	25.5	1.2	250	-9997		25.5	0.8	253.6	63.2			2019-04-06 16:00:00	24.4	2	230	67		24.9	0.4	200.2	69.1			2019-04-06 16:00:00	21.5	0.9	188	82		23.4	0.5	236.2	68.2			2019-04-06 16:00:00	23.8	0.9	170	68		24.6	1	271.7	62.6			2019-04-06 16:00:00	24.8
2019-04-06 17:00:00	24.9	1.5	250	68		25.1	1.2	243.1	67.5			2019-04-06 17:00:00	24	2.3	220	69		24.7	1.8	207.2	67.5			2019-04-06 17:00:00	21.3	0.9	144	82		23	0.7	232.8	71.1			2019-04-06 17:00:00	24	0.4	170	63		24.3	0.5	267.4	63.8			2019-04-06 17:00:00	24.9
2019-04-06 18:00:00	24.4	1.4	250	-9997		24.7	1.1	218.8	69			2019-04-06 18:00:00	23.6	0.8	230	73		24.1	0.9	218.3	70.7			2019-04-06 18:00:00	21.1	0.8	176	82		22	0.5	189.5	79.2			2019-04-06 18:00:00	23.5	1.4	170	63		23.9	1.5	203	66.3			2019-04-06 18:00:00	23.3
2019-04-06 19:00:00	24.1	1.2	220	-9997		24.1	1	175.6	69.2			2019-04-06 19:00:00	23.2	0.9	200	73		23.7	1.1	137.2	70.7			2019-04-06 19:00:00	20.9	0.4	201	84		21.5	0.8	126.4	80.8			2019-04-06 19:00:00	23	1	160	74		23	0.9	162.1	73.6			2019-04-06 19:00:00	22.8
2019-04-06 20:00:00	24.1	1	210	-9997		23.8	1.2	103.7	72			2019-04-06 20:00:00	23.1	0.7	200	74		23.7	0.4	70.7	71.5			2019-04-06 20:00:00	20.9	0.7	178	85		21.3	1	100.4	81.7			2019-04-06 20:00:00	22.4	0.9	110	76		22.3	1.1	90.4	76.3			2019-04-06 20:00:00	22.2
2019-04-06 21:00:00	23.5	1.4	180	-9997		23.3	1.2	107	76.5			2019-04-06 21:00:00	22.5	0.7	180	77		23.3	0.7	88.2	74.5			2019-04-06 21:00:00	21	0.9	202	86		21.4	1	103.3	80.6			2019-04-06 21:00:00	22	1.1	120	80		22.1	1	76.6	78.8			2019-04-06 21:00:00	22.2
2019-04-06 22:00:00	22.8	1.2	180	-9997		22.9	0.7	110.4	80.8			2019-04-06 22:00:00	21.6	0.5	290	82		22.7	0.6	276.8	77.7			2019-04-06 22:00:00	19.9	0.9	200	91		21	0.9	148	82.4			2019-04-06 22:00:00	21.9	0.5	140	81		21.6	0.3	116.7	82.4			2019-04-06 22:00:00	22.1
2019-04-06 23:00:00	22.3	1	180	-9997		22.3	0.6	143.6	83			2019-04-06 23:00:00	20.9	0.5	230	85		22	0.6	290.5	81.4			2019-04-06 23:00:00	20.1	1.8	212	89		20.6	0.3	200.8	83.1			2019-04-06 23:00:00	21.3	0.4	10	82		21.2	0.3	341.8	84.7			2019-04-06 23:00:00	23.1
2019-04-07	21.8	0.4	140	-9997		21.7	0.5	169.1	85.9			2019-04-07	20.3	0.3	190	88		21.5	0.4	298	82.7			2019-04-07	19.4	0	0	94		20.1	0.4	248	85.8			2019-04-07	20.7	1.4	100	86		20.8	1	72.8	85.9			2019-04-07	23.8
2019-04-07 01:00:00	21.7	1.4	230	-9997		21.2	0.8	167.2	88.7			2019-04-07 01:00:00	20.1	1.6	190	89		21.2	1	268.4	84.6			2019-04-07 01:00:00	20.5	0.5	197	93		20	0.3	189.4	86.8			2019-04-07 01:00:00	20.7	0.7	100	85		20.6	0.7	98.1	87.4			2019-04-07 01:00:00	22.9
2019-04-07 02:00:00	21.7	0.5	160	-9997		21.2	0.6	172.4	86.5			2019-04-07 02:00:00	20.5	0.5	230	88		21.3	0.2	258.4	84.8			2019-04-07 02:00:00	19.4	0.7	177	94		20.2	0.6	172	85.9			2019-04-07 02:00:00	20.7	1.1	110	84		20.7	0.7	65.7	86.1			2019-04-07 02:00:00	22.5
2019-04-07 03:00:00	21.4	1.3	170	-9997		21.1	1	176	86.1			2019-04-07 03:00:00	20.5	0.1	0	87		21.4	0.1	225.6	84			2019-04-07 03:00:00	19.8	0.3	199	92		20.5	0.7	165.1	83.6			2019-04-07 03:00:00	20.6	0.9	110	82		21	0.8	129.2	82.7			2019-04-07 03:00:00	22.4
2019-04-07 04:00:00	21.3	1	170	-9997		21.1	1.1	165.9	85.3			2019-04-07 04:00:00	20.4	0.7	190	88		21.4	0.5	251.4	84			2019-04-07 04:00:00	20.1	0.3	165	93		20.8	0.7	184.5	82.2			2019-04-07 04:00:00	20.2	1.5	120	82		21.2	1.1	175.3	82.1			2019-04-07 04:00:00	22.3
2019-04-07 05:00:00	21.4	1.7	190	-9997		21	1.7	155	84.8			2019-04-07 05:00:00	20.7	0.8	210	86		21.4	0.5	258.6	84.8			2019-04-07 05:00:00	19.8	0.9	208	92		20.7	0.9	170.9	80.8			2019-04-07 05:00:00	20.5	1	120	79		20.9	0.7	127.6	81.9			2019-04-07 05:00:00	22.3
2019-04-07 06:00:00	21.4	2.2	190	-9997		20.8	1.8	153	85.6			2019-04-07 06:00:00	20.7	0.3	220	86		21.6	0.3	268.5	84.2			2019-04-07 06:00:00	19.7	0	0	90		20.5	1.3	144.4	77.9			2019-04-07 06:00:00	20.8	1.2	120	79		20.3	1	105.5	80.8			2019-04-07 06:00:00	22.7
2019-04-07 07:00:00	21.6	0.7	220	-9997		21.6	0.9	148.6	79.5			2019-04-07 07:00:00	21.7	0.1	0	82		22.3	0.1	252	81.4			2019-04-07 07:00:00	20.4	0.3	27	89		21.2	0.8	153.3	68.7			2019-04-07 07:00:00	21.6	0.5	110	78		21.8	0.5	168.8	77.5			2019-04-07 07:00:00	-999.7
2019-04-07 08:00:00	22.7	1	170	80		23	0.9	131.3	74.1			2019-04-07 08:00:00	22.5	0.4	70	80		23.3	0.5	128.2	77.2			2019-04-07 08:00:00	21.7	0.5	168	85		22.2	0.3	188	69.3			2019-04-07 08:00:00	23.5	0.6	90	74		23.6	0.7	264.9	74.3			2019-04-07 08:00:00	24.7
2019-04-07 09:00:00	24.2	0.3	180	74		24.6	0.2	241.7	70.3			2019-04-07 09:00:00	23.5	0.1	0	76		24.9	0.2	199.3	69			2019-04-07 09:00:00	21.9	0.6	169	78		23.6	0.5	262.5	70.5			2019-04-07 09:00:00	25.6	2.6	280	73		25.2	2.7	256.1	72.2			2019-04-07 09:00:00	25.1
2019-04-07 10:00:00	25.5	1.2	260	-9997		25.9	0.6	325	65.6			2019-04-07 10:00:00	25.4	1.5	250	70		25.8	0.7	190.8	63.8			2019-04-07 10:00:00	22.8	0.9	201	82		24.6	0.7	217.5	68.2			2019-04-07 10:00:00	26.6	2.4	270	71		26	2.9	262.3	67.6			2019-04-07 10:00:00	26.3
2019-04-07 11:00:00	27.1	1.5	300	64		27.3	1.3	243.9	61.6			2019-04-07 11:00:00	27.6	2.1	220	65		27.1	1.6	193.6	62.3			2019-04-07 11:00:00	24.3	1.4	219	75		26.1	1.4	266.8	67.5			2019-04-07 11:00:00	27.2	2.4	280	69		26.4	2.9	258.1	68			2019-04-07 11:00:00	27.7
2019-04-07 12:00:00	29.1	1.1	250	-9997		28.5	1.1	229.5	57.6			2019-04-07 12:00:00	28.4	2.3	230	62		28.3	1.8	169.2	58.2			2019-04-07 12:00:00	25.4	1.2	238	72		27.1	2.2	260.9	64.7			2019-04-07 12:00:00	27	3.2	280	69		26.9	3.6	265.9	67.3			2019-04-07 12:00:00	27.6
2019-04-07 13:00:00	30.7	3.4	290	-9997		29.5	1.8	218.9	59.8			2019-04-07 13:00:00	29.3	2.5	240	60		30	2.9	268.3	51.8			2019-04-07 13:00:00	26.3	1.3	239	70		27	2.8	266.4	66.5			2019-04-07 13:00:00	27	4.4	290	70		26.8	4.5	267.6	68.9			2019-04-07 13:00:00	27.3
2019-04-07 14:00:00	30.9	4.3	280	54		30.2	4.1	284.1	54.8			2019-04-07 14:00:00	29.7	3.3	240	59		29.6	3.1	281.4	57.3			2019-04-07 14:00:00	26.5	2	233	69		26.8	2	269.2	67			2019-04-07 14:00:00	27.6	4.2	270	65		27.2	4.2	262.5	66.2			2019-04-07 14:00:00	27.8
2019-04-07 15:00:00	30.9	3.8	270	-9997		30.1	3.9	281.8	52.8			2019-04-07 15:00:00	29.7	4.2	230	54		29.6	3.9	279.6	54.1			2019-04-07 15:00:00	27.1	2.4	229	62		27.3	3.1	260.6	60.3			2019-04-07 15:00:00	27.5	3.9	280	67		27.3	4.1	266.3	68.7			2019-04-07 15:00:00	28.4
2019-04-07 16:00:00	29.7	3.1	280	-9997		29.4	3.4	284.1	53.9			2019-04-07 16:00:00	29.5	3	220	53		29.2	2.7	286.3	55.4			2019-04-07 16:00:00	27.1	1.5	237	62		26.8	1.6	270.6	64.5			2019-04-07 16:00:00	27.8	2.2	290	67		27.3	2.7	273.1	67.8			2019-04-07 16:00:00	29
2019-04-07 17:00:00	28.5	1.1	270	62		27.1	1.4	325.5	74			2019-04-07 17:00:00	27.7	1.5	270	64		28.1	1.6	303.2	62.3			2019-04-07 17:00:00	25.6	1.1	238	72		25.6	1	287.1	70.5			2019-04-07 17:00:00	25.9	2.3	290	73		26.1	2.6	289.7	72.8			2019-04-07 17:00:00	27.7
2019-04-07 18:00:00	27.2	0.7	230	-9997		26.1	1	332.7	78.5			2019-04-07 18:00:00	26.7	2.3	250	68		26.8	1.8	293.8	69.5			2019-04-07 18:00:00	24.1	1.3	226	80		24.2	0.7	269.8	78.6			2019-04-07 18:00:00	25.7	1.2	280	72		25.1	1.5	277.2	75.7			2019-04-07 18:00:00	26
2019-04-07 19:00:00	26.5	1.6	10	-9997		26.5	1	263.2	71.3			2019-04-07 19:00:00	26.1	1.2	70	71		26.3	1.3	271	70.9			2019-04-07 19:00:00	23.8	0.3	225	81		23.9	0.5	223.2	79.7			2019-04-07 19:00:00	25.4	0.5	290	69		25.1	0.7	252.1	74.2			2019-04-07 19:00:00	25.8
2019-04-07 20:00:00	26.1	0.5	999.9	-9997		26.1	0.6	167.6	75.2			2019-04-07 20:00:00	25.6	0.8	60	73		26.1	0.9	220.6	71.3			2019-04-07 20:00:00	23.4	0.4	327	79		23.5	1	281	79.3			2019-04-07 20:00:00	25.2	1.4	310	71		24.8	1.3	257.9	75			2019-04-07 20:00:00	25.7
2019-04-07 21:00:00	25.4	0.4	60	-9997		25.6	0.4	351.4	76.4			2019-04-07 21:00:00	24.6	1.1	50	79		25.2	1.4	292.6	75.6			2019-04-07 21:00:00	22.2	0	0	87		23	0.8	259.2	78.1			2019-04-07 21:00:00	24.6	0.5	220	79		24.6	0.6	238.5	78.8			2019-04-07 21:00:00	24.8
2019-04-07 22:00:00	25.2	0.9	20	-9997		25	0.4	241.2	80.9			2019-04-07 22:00:00	23.7	0	0	85		24.9	0.3	205.9	78.3			2019-04-07 22:00:00	22.7	0	0	82		22.9	0.3	188.7	80.7			2019-04-07 22:00:00	24.3	0.2	0	80		24.2	0.2	176.6	83			2019-04-07 22:00:00	24.5
2019-04-07 23:00:00	25	0.2	0	-9997		24.5	0.3	143.7	76			2019-04-07 23:00:00	23.9	0.1	0	83		24.5	0.2	262.5	80.4			2019-04-07 23:00:00	21.4	0.7	217	88		22.5	0.3	182.8	87.1			2019-04-07 23:00:00	23.5	0.5	120	81		23.6	0.5	153.3	84.6			2019-04-07 23:00:00	24.3
2019-04-08	24.3	1.1	170	-9997		24.1	0.6	69	76.4			2019-04-08	23.6	0.8	210	84		23.8	0.9	292.2	82.8			2019-04-08	21.1	0	0	91		22	0.3	268.8	89.9			2019-04-08	22.7	0.4	80	84		23.1	0.4	47.3	84.4			2019-04-08	23.5
2019-04-08 01:00:00	23.6	1.1	160	-9997		23.7	0.7	135.1	77			2019-04-08 01:00:00	22.6	0	0	88		23.7	0.8	312.1	81.8			2019-04-08 01:00:00	20.9	0	0	94		21.5	0.7	315.5	92.2			2019-04-08 01:00:00	22.6	1.5	100	84		22.6	1.2	103.3	85.4			2019-04-08 01:00:00	23
2019-04-08 02:00:00	23	1.4	170	-9997		23.2	0.8	111.6	81.7			2019-04-08 02:00:00	22	0	0	91		23.3	0.5	284.9	82.5			2019-04-08 02:00:00	20.8	0.8	213	94		21.3	0.3	331.4	92.2			2019-04-08 02:00:00	22.6	0.7	150	82		22.3	0.7	49.1	85.7			2019-04-08 02:00:00	22.7
2019-04-08 03:00:00	22.8	1.2	180	-9997		22.8	1	162.2	84.4			2019-04-08 03:00:00	22	0.9	210	91		23	0.8	254.1	85.6			2019-04-08 03:00:00	20.5	0.9	220	95		21.2	0.3	96.8	94.3			2019-04-08 03:00:00	22.6	1.2	100	81		22	1.2	73.6	86			2019-04-08 03:00:00	21.9
2019-04-08 04:00:00	22.4	1.5	180	-9997		22.3	0.7	139.5	85.5			2019-04-08 04:00:00	21.7	1.1	200	91		22.6	0.4	282.8	87			2019-04-08 04:00:00	19.9	0	0	95		21	0.5	90.3	96.4			2019-04-08 04:00:00	22	1.6	110	81		21.8	1.3	79	84.3			2019-04-08 04:00:00	21.9
2019-04-08 05:00:00	22.2	0.9	130	-9997		21.9	0.4	141.4	85.9			2019-04-08 05:00:00	21.5	0.7	210	89		22.2	0.7	263.1	88.3			2019-04-08 05:00:00	19.6	1.1	211	97		20.7	0.2	222.4	96.7			2019-04-08 05:00:00	21.7	1.1	110	83		21.4	0.9	119	83.2			2019-04-08 05:00:00	21.7
2019-04-08 06:00:00	22	0.6	170	-9997		21.7	0.6	185.2	85.5			2019-04-08 06:00:00	21.3	0.9	220	89		22.1	0.8	269.6	88.2			2019-04-08 06:00:00	19.7	0.5	213	93		20.3	0.5	233.8	96			2019-04-08 06:00:00	21.5	1.3	100	81		21	1	79.5	83.1			2019-04-08 06:00:00	21.2
2019-04-08 07:00:00	22.7	1	160	-9997		22.6	0.8	179	81.8			2019-04-08 07:00:00	21.8	1.2	200	88		22.9	1	181.5	82.8			2019-04-08 07:00:00	20.6	0.5	206	92		21.9	0.6	203.9	83.5			2019-04-08 07:00:00	22.4	1.5	100	78		21.9	1.3	86	78.6			2019-04-08 07:00:00	21.8
2019-04-08 08:00:00	24.8	0.8	120	79		24.5	0.4	270.7	76			2019-04-08 08:00:00	23.7	0.3	230	80		24.6	0.4	143.1	74.6			2019-04-08 08:00:00	23.4	0.5	179	77		23.4	0.4	302.2	73.5			2019-04-08 08:00:00	24.5	0.8	80	75		24	0.5	327.1	76.7			2019-04-08 08:00:00	24.5
2019-04-08 09:00:00	27.5	0.2	0	69		26.6	0.2	315.6	66.4			2019-04-08 09:00:00	26.4	0	0	68		26.7	0.5	131.3	67.7			2019-04-08 09:00:00	25.7	0.4	185	69		25.5	0.8	303.7	66.5			2019-04-08 09:00:00	26.4	0.9	20	68		26.3	1	328.5	68.3			2019-04-08 09:00:00	26.5
2019-04-08 10:00:00	29.4	0.6	10	-9997		28.5	0.7	306.1	58.2			2019-04-08 10:00:00	28.1	0.6	290	63		28.6	0.7	118.1	59.9			2019-04-08 10:00:00	26.7	0.4	9	63		26.8	0.7	347.7	62.5			2019-04-08 10:00:00	28.4	1.1	290	63		28.1	1.4	294.1	63.7			2019-04-08 10:00:00	27.8
2019-04-08 11:00:00	31.7	0.7	999.9	51		30.3	1	302.9	51.1			2019-04-08 11:00:00	30.3	1	80	54		30.4	0.9	165.9	52			2019-04-08 11:00:00	27.8	0.3	9	62		28.2	0.9	34.3	57			2019-04-08 11:00:00	28.8	1.4	300	63		28.6	1.8	275.2	58.5			2019-04-08 11:00:00	29.3
2019-04-08 12:00:00	32.6	0.8	310	-9997		30.3	1.1	299.1	58.6			2019-04-08 12:00:00	31.5	1.9	40	54		30	1.9	318.3	61.4			2019-04-08 12:00:00	28.7	0.3	308	59		28.4	1.1	334.6	65.7			2019-04-08 12:00:00	28.5	2.3	290	66		28.4	2.6	288.8	61			2019-04-08 12:00:00	29.6
2019-04-08 13:00:00	32.5	1.8	330	-9997		27	1.7	113.5	73.2			2019-04-08 13:00:00	31.5	2.5	10	53		28.6	2.1	342.1	67.5			2019-04-08 13:00:00	27.8	0.9	351	68		27.6	0.6	300.9	66.2			2019-04-08 13:00:00	29.3	1.8	290	64		28	2	287.8	64.5			2019-04-08 13:00:00	28.8
2019-04-08 14:00:00	31.6	1.3	310	55		26.7	1.3	252.4	75.7			2019-04-08 14:00:00	29.8	1.4	310	59		24.4	1.7	53.5	77.7			2019-04-08 14:00:00	27.7	0.7	352	68		28.3	1.1	309.2	62.3			2019-04-08 14:00:00	28.7	1.5	280	65		28.1	1.7	297.3	64.3			2019-04-08 14:00:00	29
2019-04-08 15:00:00	30.7	1.4	330	-9997		26.2	1.8	23.8	80.5			2019-04-08 15:00:00	30	2.4	30	59		27.5	1.8	312.6	62			2019-04-08 15:00:00	27.1	0.6	345	69		25.3	0.8	12.8	70.6			2019-04-08 15:00:00	28.5	1.9	290	65		27.8	2.2	308.2	65.6			2019-04-08 15:00:00	28.9
2019-04-08 16:00:00	30	0.7	350	-9997		27.6	1	348.5	66			2019-04-08 16:00:00	29	2	30	60		28.7	1.9	348.3	62.3			2019-04-08 16:00:00	26.5	0.4	327	71		26.1	0.3	245.4	68.4			2019-04-08 16:00:00	27.9	1.1	290	66		27.2	1.3	294.5	68.9			2019-04-08 16:00:00	28.7
2019-04-08 17:00:00	28.9	0.8	999.9	60		29.3	1	199.3	58.8			2019-04-08 17:00:00	28.1	1.1	50	61		27.9	1.2	349.2	63.5			2019-04-08 17:00:00	26	0.4	334	76		25.6	0.9	8	70.8			2019-04-08 17:00:00	26.8	1.5	300	70		27.6	1.5	280	64			2019-04-08 17:00:00	27.5
2019-04-08 18:00:00	27.9	0.2	0	-9997		27.9	0.3	156.1	65.6			2019-04-08 18:00:00	27	0.6	280	67		27.5	0.6	293.6	66.7			2019-04-08 18:00:00	24.9	0.3	343	82		25.3	0.3	347.2	78.8			2019-04-08 18:00:00	26	0.8	300	75		26.8	0.9	273.7	70.8			2019-04-08 18:00:00	25.9
2019-04-08 19:00:00	27.2	0.3	190	-9997		27.1	0.4	132	67			2019-04-08 19:00:00	25.8	0.2	0	71		26.3	0.3	291.3	71.1			2019-04-08 19:00:00	24.2	0	0	83		24.8	0.3	318.4	80.6			2019-04-08 19:00:00	25.8	0.4	160	73		26	0.4	218.7	73.2			2019-04-08 19:00:00	25.9
2019-04-08 20:00:00	27	0.1	0	-9997		26.2	0.3	89.5	72.2			2019-04-08 20:00:00	25.3	0.5	200	74		25.8	0.4	320.2	73.3			2019-04-08 20:00:00	24.3	0.5	232	80		24.1	0.8	277.6	84.5			2019-04-08 20:00:00	25.4	0	0	76		25.7	0.5	218	73.5			2019-04-08 20:00:00	25.6
2019-04-08 21:00:00	26.8	0.1	0	-9997		25.8	0.2	92.1	75.9			2019-04-08 21:00:00	24.9	0.2	0	78		25.3	0.3	269.3	76.8			2019-04-08 21:00:00	23.4	0.4	149	88		23.9	0.1	268.2	85.4			2019-04-08 21:00:00	24.8	0.7	70	78		25.3	0.6	183.4	74			2019-04-08 21:00:00	25.3
2019-04-08 22:00:00	26.2	1.6	160	-9997		25.3	1.2	91.5	78.4			2019-04-08 22:00:00	24.4	1.3	230	82		24.8	1.1	261.7	80.6			2019-04-08 22:00:00	23.2	0.9	212	87		23.5	0.7	227.3	87.2			2019-04-08 22:00:00	24.4	0.7	70	80		25	0.8	238.5	74.9			2019-04-08 22:00:00	24.7
2019-04-08 23:00:00	25.4	1.4	180	-9997		24.8	0.9	179.8	80.5			2019-04-08 23:00:00	23.9	0.8	210	84		24.5	0.7	214.8	82.5			2019-04-08 23:00:00	22.8	0	0	90		23.3	0.5	228	87.9			2019-04-08 23:00:00	24.4	0.3	300	82		24.6	0.4	236	77.9			2019-04-08 23:00:00	24.3
2019-04-09	24.9	0.6	190	-9997		24.1	0.6	213.1	86.5			2019-04-09	23.4	1.2	200	86		24.1	1	229.2	82.6			2019-04-09	22.4	0.2	0	93		23.2	0.6	195.1	84.2			2019-04-09	24.2	0.3	90	82		24.2	0.4	203.3	82.1			2019-04-09	24.1
2019-04-09 01:00:00	24.4	0.7	160	-9997		23.8	0.4	183.1	85.4			2019-04-09 01:00:00	23.1	1.2	200	86		23.6	0.7	255.5	84.4			2019-04-09 01:00:00	23.1	0.5	230	88		23	0.4	201.1	81.1			2019-04-09 01:00:00	24.1	0.1	0	83		23.8	0.1	206.4	84.7			2019-04-09 01:00:00	23.4
2019-04-09 02:00:00	24.1	1.1	150	-9997		23.5	0.3	138.9	83.9			2019-04-09 02:00:00	22.6	1.1	200	87		23.3	0.6	269.1	85.3			2019-04-09 02:00:00	21.8	0	0	95		22.7	0.8	173.8	77.3			2019-04-09 02:00:00	23.8	0.9	60	83		23.3	0.5	351	86.6			2019-04-09 02:00:00	23.4
2019-04-09 03:00:00	24.2	0.4	190	-9997		23.2	0.5	175.1	80.7			2019-04-09 03:00:00	22.6	1.4	190	86		22.9	1	292	86.6			2019-04-09 03:00:00	21.8	0.6	211	95		22.6	0.9	218.5	74.8			2019-04-09 03:00:00	23.6	1	70	84		23.5	0.9	253.2	86.6			2019-04-09 03:00:00	22.7
2019-04-09 04:00:00	23.8	1.1	140	-9997		23	0.7	137.1	81			2019-04-09 04:00:00	22.7	1	200	85		23.1	0.9	299	85.6			2019-04-09 04:00:00	21.6	0	0	94		22.5	0.2	156.8	77.2			2019-04-09 04:00:00	23.5	1.5	110	81		23.4	1.1	246.2	87.2			2019-04-09 04:00:00	22.4
2019-04-09 05:00:00	23.4	1.8	170	-9997		23.2	1.2	187.1	83.4			2019-04-09 05:00:00	22.6	0.9	230	86		23.2	1	302.6	83.6			2019-04-09 05:00:00	21	0.9	212	90		22.3	0.6	196.2	80			2019-04-09 05:00:00	23.3	1.6	100	79		23.1	0.6	299.5	84.3			2019-04-09 05:00:00	22.6
2019-04-09 06:00:00	23.2	1.2	170	-9997		22.8	1.1	167.3	84.4			2019-04-09 06:00:00	22.3	0.8	200	86		23	0.7	230.5	86.2			2019-04-09 06:00:00	20.9	1.2	219	86		21.9	0.7	165.9	78.6			2019-04-09 06:00:00	22.8	0.9	110	78		22.9	0.9	98.5	78.9			2019-04-09 06:00:00	22.2
2019-04-09 07:00:00	23.7	1.3	190	-9997		23.5	1	146.9	77.4			2019-04-09 07:00:00	22.6	0.8	200	87		23.5	0.6	170.4	82.3			2019-04-09 07:00:00	21.6	0.9	183	82		22.4	0.2	240.2	79.4			2019-04-09 07:00:00	23.2	1.1	110	74		23.3	1.2	206.6	79.5			2019-04-09 07:00:00	23.4
2019-04-09 08:00:00	26.1	2.1	190	69		25.2	1.3	94.2	74.6			2019-04-09 08:00:00	24.4	0.2	0	81		25.1	0.3	105	77			2019-04-09 08:00:00	23.9	0.6	136	67		23.8	0.2	252.1	80.9			2019-04-09 08:00:00	24.3	0.4	120	73		24.4	0.5	189.1	73.7			2019-04-09 08:00:00	26.1
2019-04-09 09:00:00	26.9	0.2	0	72		26.8	0.3	223.5	69.4			2019-04-09 09:00:00	25.7	1.1	250	75		26.6	1.1	166.7	70.6			2019-04-09 09:00:00	25.8	0.9	86	61		25.6	0.6	265.4	71.4			2019-04-09 09:00:00	27	0.7	999.9	70		26.4	0.9	194.6	69.4			2019-04-09 09:00:00	27.7
2019-04-09 10:00:00	28.7	0.3	100	-9997		28.3	0.4	332.2	63.1			2019-04-09 10:00:00	28.1	0.7	220	66		28.4	0.8	145.9	62.5			2019-04-09 10:00:00	27.3	0.7	87	62		27.3	1.1	262	61.8			2019-04-09 10:00:00	29.2	1.7	310	65		28	2.1	265.6	69.7			2019-04-09 10:00:00	28.7
2019-04-09 11:00:00	30.9	0.6	999.9	58		29.9	0.7	311.2	58.1			2019-04-09 11:00:00	29.9	0.6	170	59		30.2	0.7	146.1	54.3			2019-04-09 11:00:00	28.2	1.1	219	60		28.7	0.7	246.5	52			2019-04-09 11:00:00	29.1	2.9	280	66		28.1	3.2	268.6	69			2019-04-09 11:00:00	29.8
2019-04-09 12:00:00	32	0.8	140	-9997		31.1	1.1	322.2	52.7			2019-04-09 12:00:00	31.1	1.9	240	47		31.7	1.7	169.6	45.3			2019-04-09 12:00:00	29	0	0	63		29.5	2.2	241.5	56.6			2019-04-09 12:00:00	29.2	3.1	280	66		29	3.6	254.9	63.6			2019-04-09 12:00:00	30.5
2019-04-09 13:00:00	32.8	0.6	999.9	-9997		32.1	0.7	337.5	45.4			2019-04-09 13:00:00	31.8	1.3	300	49		32.5	1	292.8	42.5			2019-04-09 13:00:00	28.4	1.6	222	66		29.8	1.3	261.2	61.5			2019-04-09 13:00:00	29	4.5	290	68		29	4.5	252.2	65.6			2019-04-09 13:00:00	29.7
2019-04-09 14:00:00	31.6	3.8	10	60		30.9	3.7	352.1	62.8			2019-04-09 14:00:00	31.2	1.7	330	58		32	0.8	130.8	57.4			2019-04-09 14:00:00	28.6	1.6	237	67		29.2	3.6	260.5	67			2019-04-09 14:00:00	28.8	4.4	280	71		28.6	4.7	251.7	68.3			2019-04-09 14:00:00	29.3
2019-04-09 15:00:00	29.8	3.3	40	-9997		30.5	2.7	346.5	63.9			2019-04-09 15:00:00	30.6	2.9	230	61		31.3	2.5	301.7	61.5			2019-04-09 15:00:00	27.5	2	236	73		28.4	3.4	260.8	70.6			2019-04-09 15:00:00	28.5	2.7	280	74		28.1	3.4	250.9	72.6			2019-04-09 15:00:00	28.9
2019-04-09 16:00:00	29.3	2.3	100	-9997		30.3	2.4	63.7	58.5			2019-04-09 16:00:00	30.5	2.3	250	63		30.7	1.7	327.6	62.2			2019-04-09 16:00:00	27	1	239	80		27.7	2.7	257.9	75.8			2019-04-09 16:00:00	27.3	3	280	77		27.6	3.6	252.1	75.4			2019-04-09 16:00:00	29.2
2019-04-09 17:00:00	29.4	1.2	250	68		29.7	1.4	66.5	63			2019-04-09 17:00:00	28.3	2.9	270	72		30.1	2.6	264.1	66.8			2019-04-09 17:00:00	25.5	2	235	84		26.3	2.1	254.2	81.9			2019-04-09 17:00:00	26.9	2.9	280	79		27.1	3.5	251	79.2			2019-04-09 17:00:00	27.7
2019-04-09 18:00:00	28.2	2.1	250	-9997		28.6	1.3	62.4	69.5			2019-04-09 18:00:00	27.6	2.6	240	75		28.3	2.3	263.1	74.5			2019-04-09 18:00:00	25.4	1.2	234	85		25.4	2.2	239.5	86.4			2019-04-09 18:00:00	26.6	1.7	300	80		26.3	2.2	245.4	84.2			2019-04-09 18:00:00	27.1
2019-04-09 19:00:00	27.9	1.9	250	-9997		27.7	0.9	51.5	73.2			2019-04-09 19:00:00	27.4	3.1	220	75		27.8	1.9	255.8	76.9			2019-04-09 19:00:00	25	1.8	225	87		25.3	1.4	221.1	87.2			2019-04-09 19:00:00	26.2	1.2	240	82		26	1.5	251.9	87.1			2019-04-09 19:00:00	26.5
2019-04-09 20:00:00	28	0.4	240	-9997		27.3	0.6	79.3	75.1			2019-04-09 20:00:00	27.2	1.1	220	76		27.7	1	143.7	73.7			2019-04-09 20:00:00	25.1	1.1	228	87		25.1	1	232	87.3			2019-04-09 20:00:00	26.1	1.1	999.9	82		26.2	1.3	259.9	83.9			2019-04-09 20:00:00	26.4
2019-04-09 21:00:00	27.9	0.4	220	-9997		26.8	0.7	73.3	79.3			2019-04-09 21:00:00	27.1	0.9	220	78		27.8	0.8	209.9	75.3			2019-04-09 21:00:00	24.9	1.6	223	87		25.1	1.4	186.7	86.6			2019-04-09 21:00:00	26.1	2.4	270	82		25.7	2.9	238.2	87.6			2019-04-09 21:00:00	26.3
2019-04-09 22:00:00	27.8	1.1	240	-9997		26.6	1	110.8	79.8			2019-04-09 22:00:00	27.1	1.8	220	77		27.4	1.1	218.8	77.7			2019-04-09 22:00:00	24.8	1.5	232	88		24.8	0.8	243.2	89			2019-04-09 22:00:00	25.9	2.3	280	83		25.4	2.8	242.6	87.8			2019-04-09 22:00:00	26.3
2019-04-09 23:00:00	27.5	0.5	220	-9997		26.4	0.7	146.2	79.2			2019-04-09 23:00:00	26.3	1	210	80		27	0.8	214.8	80.2			2019-04-09 23:00:00	24.7	2	231	87		24.7	0.7	225.7	88.8			2019-04-09 23:00:00	25.6	1.5	280	83		25.2	1.9	230.7	88.4			2019-04-09 23:00:00	26.2
2019-04-10	27.1	1	220	-9997		26.4	1.2	179.5	77.4			2019-04-10	25.5	1.2	190	83		26.5	1.1	244.8	81.4			2019-04-10	24.5	1.9	232	88		24.6	1.2	197.5	87.8			2019-04-10	25.6	1.6	270	80		25	2.1	229.5	88			2019-04-10	26
2019-04-10 01:00:00	26.4	1.1	220	-9997		26.1	1.2	168.5	77.5			2019-04-10 01:00:00	25.5	0.6	200	84		25.9	0.8	245.8	82.1			2019-04-10 01:00:00	24.2	1.3	228	87		24.2	1.3	216.2	85.9			2019-04-10 01:00:00	25.7	2.3	280	81		24.7	2.8	234.9	89.8			2019-04-10 01:00:00	26.1
2019-04-10 02:00:00	25.4	1.8	160	-9997		25.5	1.3	169.8	81			2019-04-10 02:00:00	24.7	0.3	180	87		25.6	0.4	216.7	81.7			2019-04-10 02:00:00	23.9	3.1	223	87		23.6	0.8	228.5	89.5			2019-04-10 02:00:00	25.5	1.1	170	79		24.7	1.4	232.6	88.3			2019-04-10 02:00:00	25.7
2019-04-10 03:00:00	24.8	0.2	0	-9997		24.7	0.3	173.6	84.6			2019-04-10 03:00:00	24.1	0.1	0	89		25.2	0.2	227.2	80.9			2019-04-10 03:00:00	23.5	1.8	225	88		23.2	1.2	227	86			2019-04-10 03:00:00	25.3	0.7	210	79		24.6	1	228.4	87.2			2019-04-10 03:00:00	25.7
2019-04-10 04:00:00	24.6	1	210	-9997		24.2	1.2	164.3	86.7			2019-04-10 04:00:00	24	0.6	220	88		24.9	0.5	269.7	81.1			2019-04-10 04:00:00	23.7	0.7	230	84		22.8	2.4	230.5	85.6			2019-04-10 04:00:00	25.5	1.8	300	76		24.6	2.2	232	83			2019-04-10 04:00:00	25.5
2019-04-10 05:00:00	24.1	1.8	180	-9997		23.7	1.6	168.3	87.3			2019-04-10 05:00:00	23.6	0.6	200	88		24.4	0.7	274.1	81.9			2019-04-10 05:00:00	21.6	0	0	96		22.6	4.1	242.4	82.5			2019-04-10 05:00:00	25.2	2.9	290	81		24.4	3.2	241.2	83.9			2019-04-10 05:00:00	25.6
2019-04-10 06:00:00	24	1.7	170	-9997		23.4	1.3	159.2	85.7			2019-04-10 06:00:00	22.9	1.3	200	90		24.1	0.8	209.3	80.8			2019-04-10 06:00:00	20.9	0.6	194	96		22.7	3.9	247.4	81.2			2019-04-10 06:00:00	25	0.9	160	81		24.3	1.2	241.9	84.9			2019-04-10 06:00:00	26.4
2019-04-10 07:00:00	24.6	1.7	170	-9997		24.4	0.8	128.2	83.6			2019-04-10 07:00:00	24	0	0	89		25.2	0.9	204.3	67			2019-04-10 07:00:00	22.6	0.3	40	90		24.3	1.9	247.6	72.6			2019-04-10 07:00:00	25.6	0.6	999.9	77		25.5	0.8	245.7	77.6			2019-04-10 07:00:00	27.7
2019-04-10 08:00:00	27	1.1	230	75		26.5	1	217.5	70.1			2019-04-10 08:00:00	25.6	0.4	160	82		26.5	0.6	213.7	64.7			2019-04-10 08:00:00	25.5	0.5	110	76		26	2.3	249.1	66			2019-04-10 08:00:00	27.1	1.1	300	76		26.4	1.4	247.7	74.5			2019-04-10 08:00:00	27.3
2019-04-10 09:00:00	29.3	0.9	80	67		28	0.4	229.9	67.7			2019-04-10 09:00:00	27.8	1.6	240	68		28.8	2	243.9	57.3			2019-04-10 09:00:00	27.2	0.9	241	66		27	4.7	248.3	63.5			2019-04-10 09:00:00	27.4	4.4	280	74		27.3	4.9	247.5	71.3			2019-04-10 09:00:00	27.9
2019-04-10 10:00:00	30.8	1	230	-9997		30	1.5	270.1	57			2019-04-10 10:00:00	30	2.8	240	63		30.2	3	254.8	53.4			2019-04-10 10:00:00	27.1	2	235	71		27.7	3.5	255.4	62.2			2019-04-10 10:00:00	27.9	4.1	270	73		27.5	4.7	255.3	73.2			2019-04-10 10:00:00	28.3
2019-04-10 11:00:00	31.9	4.2	290	58		30.5	4.2	289.3	56.2			2019-04-10 11:00:00	30.4	4.6	230	57		30.6	4.3	262.4	54.4			2019-04-10 11:00:00	27.5	2.2	234	70		27.9	3.6	251.9	65.7			2019-04-10 11:00:00	27.7	4.4	280	74		27.7	4.9	255.2	70.6			2019-04-10 11:00:00	28.2
2019-04-10 12:00:00	32.2	3.9	280	-9997		30.9	4.1	289.5	54.1			2019-04-10 12:00:00	30.8	4.8	230	56		30.8	4.6	260.7	54			2019-04-10 12:00:00	28	1.6	237	67		28.3	4.3	256	63.7			2019-04-10 12:00:00	28.2	3.6	280	70		28.3	4.3	256.9	65.6			2019-04-10 12:00:00	28.3
2019-04-10 13:00:00	34.2	4	300	-9997		31.6	3.9	290.3	46			2019-04-10 13:00:00	32.3	3.4	260	44		31.4	3.9	273.4	46.3			2019-04-10 13:00:00	28.2	2.7	228	64		28.7	4.7	258.2	55.7			2019-04-10 13:00:00	28.4	4.1	280	67		28.2	4.4	261.6	65.2			2019-04-10 13:00:00	28.8
2019-04-10 14:00:00	29	4.2	330	68		26.6	4.3	328.1	74.6			2019-04-10 14:00:00	27.9	3.6	20	68		27.7	3.3	326.2	70.2			2019-04-10 14:00:00	26.7	1.3	334	74		28.3	1.1	272.8	56.3			2019-04-10 14:00:00	28.5	3	290	68		28.4	3.2	267.3	65.4			2019-04-10 14:00:00	29.5
2019-04-10 15:00:00	27	2.5	340	-9997		26	3	323.7	72.6			2019-04-10 15:00:00	27	2.8	310	68		26	3	327.1	72.2			2019-04-10 15:00:00	24.4	0.9	334	83		25.5	1.8	313	71.3			2019-04-10 15:00:00	26	1.6	340	78		26.6	2	304	74.5			2019-04-10 15:00:00	29.3
2019-04-10 16:00:00	27.5	1.7	20	-9997		26	2	329.6	69.5			2019-04-10 16:00:00	26.5	1.9	330	68		25.1	2.3	347.6	75.6			2019-04-10 16:00:00	23.1	1	337	87		24.6	2.2	313	74.3			2019-04-10 16:00:00	24.7	1.8	340	79		25.3	2.2	334.8	76.5			2019-04-10 16:00:00	26.9
2019-04-10 17:00:00	22.5	7.8	80	81		23.4	6.2	64.6	75.9			2019-04-10 17:00:00	23.2	3.9	60	75		24.6	3.5	18.9	71.8			2019-04-10 17:00:00	22.2	2.2	21	86		23.4	2.5	356.2	80			2019-04-10 17:00:00	25	1.2	330	75		24.8	1.5	351.8	75.7			2019-04-10 17:00:00	24.7
2019-04-10 18:00:00	22.1	5.6	70	-9997		21.6	5.4	67	80.1			2019-04-10 18:00:00	21.8	3.5	80	80		22.8	3.6	102.5	76.1			2019-04-10 18:00:00	21	1.6	47	92		21.8	2.5	18.9	84.4			2019-04-10 18:00:00	23.3	2.3	30	77		24	2.5	17.2	74.7			2019-04-10 18:00:00	24.6
2019-04-10 19:00:00	21.3	4.8	80	-9997		20.9	5	73.9	81.4			2019-04-10 19:00:00	20.9	3.8	60	83		21.6	3.2	92.4	78.1			2019-04-10 19:00:00	19.1	2.3	45	96		21	1.5	25.1	87.4			2019-04-10 19:00:00	22.4	1.9	40	78		22.8	2.2	36	77.4			2019-04-10 19:00:00	24.4
2019-04-10 20:00:00	21.1	5	80	-9997		20.6	4.9	66.3	83.5			2019-04-10 20:00:00	21.2	3.4	60	80		21.3	2.8	80.5	80.3			2019-04-10 20:00:00	19.1	1.7	33	92		20	2.3	56.7	88.6			2019-04-10 20:00:00	22.2	2.5	60	78		22.3	2.4	51.1	78.1			2019-04-10 20:00:00	23.8
2019-04-10 21:00:00	20.9	5.2	90	-9997		20.5	4.7	71.2	84.3			2019-04-10 21:00:00	21	4.8	60	80		21.1	3.9	75	81.6			2019-04-10 21:00:00	19	2.5	55	91		19.7	3	56	89.2			2019-04-10 21:00:00	22	3.1	80	76		21.9	2.9	53	78.6			2019-04-10 21:00:00	23.2
2019-04-10 22:00:00	21	5	80	-9997		20.6	4.4	71	85.9			2019-04-10 22:00:00	21.2	3.7	70	80		21.1	3.4	77.9	82.2			2019-04-10 22:00:00	19.3	2.4	47	89		19.4	2.8	50.9	90.5			2019-04-10 22:00:00	21.9	1.9	60	76		22	2	59	76.9			2019-04-10 22:00:00	23
2019-04-10 23:00:00	20.8	5.6	100	-9997		20.3	4.7	72.7	86.9			2019-04-10 23:00:00	21.2	3.4	60	79		20.9	3.1	75.9	84.4			2019-04-10 23:00:00	19.3	1.4	40	88		19.5	2.6	56.6	89.1			2019-04-10 23:00:00	22	1.9	30	75		21.6	2.1	63.1	78.4			2019-04-10 23:00:00	22.2
2019-04-11	20.7	6	100	-9997		20.3	4.7	71.5	87.7			2019-04-11	20.9	3.7	60	80		20.8	3.4	70	84.6			2019-04-11	19.4	2.7	36	87		19.6	2.6	52.4	87.2			2019-04-11	21.9	2	50	75		21.6	2.1	61.7	77.8			2019-04-11	22
2019-04-11 01:00:00	20.6	4.9	110	-9997		20.4	3.9	80.2	85.7			2019-04-11 01:00:00	20.8	3.5	70	81		20.9	2	72.2	82			2019-04-11 01:00:00	18.9	1.9	59	90		19.3	1.9	60.7	87.6			2019-04-11 01:00:00	21.8	1.4	80	75		21.5	1.7	70.5	77.3			2019-04-11 01:00:00	21.8
2019-04-11 02:00:00	20.6	4	100	-9997		20.2	3.8	78	86.3			2019-04-11 02:00:00	20.7	3.2	70	80		20.7	3	69.1	84			2019-04-11 02:00:00	18.8	2.1	60	90		19.2	2.2	61.3	88.8			2019-04-11 02:00:00	21.5	1.4	60	77		21.3	1.7	57.4	77.7			2019-04-11 02:00:00	21.5
2019-04-11 03:00:00	20.5	4.6	100	-9997		20.2	4	74.2	85.6			2019-04-11 03:00:00	20.8	3.2	50	80		20.7	2.9	65.8	83			2019-04-11 03:00:00	18.7	1.7	40	90		19.2	1.9	63.6	89			2019-04-11 03:00:00	21.4	1.2	20	77		21.3	1.4	60.1	78.1			2019-04-11 03:00:00	21.5
2019-04-11 04:00:00	20.7	4.4	90	-9997		20.2	3.5	72.3	87.3			2019-04-11 04:00:00	21.1	2.5	60	79		20.7	2.2	68.3	84			2019-04-11 04:00:00	18.9	1.6	60	89		19.1	1.5	63.8	88.6			2019-04-11 04:00:00	21.5	1.6	40	76		21.2	1.6	64.2	78.2			2019-04-11 04:00:00	21.3
2019-04-11 05:00:00	20.7	4.2	90	-9997		20.3	3.2	79.9	87.1			2019-04-11 05:00:00	20.8	2.1	60	80		20.8	2	74	83.9			2019-04-11 05:00:00	18.5	1.4	90	92		19	1.3	68.5	90.9			2019-04-11 05:00:00	21.3	1.5	100	76		21.1	1.5	81.6	78.8			2019-04-11 05:00:00	21.3
2019-04-11 06:00:00	20.8	3.4	100	-9997		20.5	2.7	77.5	86.2			2019-04-11 06:00:00	21.1	2.7	60	79		20.9	1.1	64.5	83.6			2019-04-11 06:00:00	18.2	0.6	98	97		18.8	1	67.7	91.5			2019-04-11 06:00:00	21	0.9	60	79		20.8	1.1	78.4	81			2019-04-11 06:00:00	21.4
2019-04-11 07:00:00	21	5.4	80	-9997		20.7	3.5	72.8	86.8			2019-04-11 07:00:00	21.4	2.3	50	78		21.1	2	63.4	83.2			2019-04-11 07:00:00	18.6	0.5	148	95		19	0.7	71.1	90.9			2019-04-11 07:00:00	21.2	0.3	90	80		21	0.4	75.4	81.6			2019-04-11 07:00:00	21.8
2019-04-11 08:00:00	21.7	3	100	81		21.2	3	73.6	83.7			2019-04-11 08:00:00	21.4	2.1	60	79		21.6	1.8	69.4	81.2			2019-04-11 08:00:00	18.9	1	119	94		19.5	0.6	86	89.4			2019-04-11 08:00:00	22.4	0.7	70	78		21.7	0.8	86.5	80.4			2019-04-11 08:00:00	23
2019-04-11 09:00:00	21.8	3.6	70	82		21.6	3.3	64.9	83.2			2019-04-11 09:00:00	21.4	1.3	30	84		22	1.2	72.4	81.6			2019-04-11 09:00:00	20.4	1.2	83	88		20	1	103.3	87.7			2019-04-11 09:00:00	24.4	0.5	350	74		22.8	0.6	96	79.5			2019-04-11 09:00:00	25.2
2019-04-11 10:00:00	25.5	2.2	90	-9997		22.7	2.2	60.6	80.5			2019-04-11 10:00:00	23.8	2.3	40	73		23	1.4	102.5	79.1			2019-04-11 10:00:00	23.2	1.3	103	81		21.6	0.5	119.9	81.4			2019-04-11 10:00:00	25.9	1.3	320	70		24.5	1.5	280.5	74.6			2019-04-11 10:00:00	26.3
2019-04-11 11:00:00	26.1	1.6	100	73		23.8	1.8	69.5	79.6			2019-04-11 11:00:00	25.2	1.5	50	66		24.5	1	140.3	74.8			2019-04-11 11:00:00	22.8	0.4	106	81		23	0.8	161.5	74.6			2019-04-11 11:00:00	26.7	2	290	68		25.9	2.4	271.7	67.2			2019-04-11 11:00:00	27.1
2019-04-11 12:00:00	26.9	0.9	180	-9997		25.7	0.9	113.4	71.7			2019-04-11 12:00:00	26	1.4	220	67		26.1	1.4	219.2	66.2			2019-04-11 12:00:00	24.9	1.6	224	74		23.7	0.5	222.1	75.3			2019-04-11 12:00:00	26.8	2.9	290	71		25.8	3	277.7	70.4			2019-04-11 12:00:00	28.9
2019-04-11 13:00:00	26.2	0.7	220	-9997		25.8	0.9	350.2	73.5			2019-04-11 13:00:00	26	1.3	250	68		26.4	1.3	236.2	64.5			2019-04-11 13:00:00	23.2	0.6	331	81		23.5	1.5	294.3	80.8			2019-04-11 13:00:00	26	2.7	300	72		24.6	3	305.3	75.1			2019-04-11 13:00:00	26
2019-04-11 14:00:00	25.7	1.7	310	71		25.3	1.7	307.2	73.1			2019-04-11 14:00:00	24.9	2	270	72		24.8	0.3	286.1	77			2019-04-11 14:00:00	22.6	0.4	265	85		22.8	0.6	294.3	81.8			2019-04-11 14:00:00	23.9	2.1	320	78		23.6	2.3	309.9	77.1			2019-04-11 14:00:00	25
2019-04-11 15:00:00	24.4	1.1	280	-9997		23.9	1.5	294.8	80.9			2019-04-11 15:00:00	23.2	2	260	80		23.6	1.6	309	83.1			2019-04-11 15:00:00	19.5	1.4	331	97		21.6	1.3	288	81.7			2019-04-11 15:00:00	19.5	2.6	350	83		21.8	2.5	319.3	76.8			2019-04-11 15:00:00	21.1
2019-04-11 16:00:00	21	4	330	-9997		22.1	3.5	285.1	86			2019-04-11 16:00:00	20.1	1.6	350	84		21.8	1.9	288.8	82.3			2019-04-11 16:00:00	16.7	0.7	332	98		19	1.2	305.2	84.2			2019-04-11 16:00:00	18.2	2.8	350	85		19.9	2.5	359.8	78.1			2019-04-11 16:00:00	19
2019-04-11 17:00:00	20.1	2.7	300	93		20.4	3	290.6	89			2019-04-11 17:00:00	19.1	2.5	300	88		19.7	2.4	291.6	88.5			2019-04-11 17:00:00	16.7	0.5	2	98		17.4	1.3	327.7	88.4			2019-04-11 17:00:00	18.2	1.6	30	88		19	1.6	6.6	81.9			2019-04-11 17:00:00	18.1
2019-04-11 18:00:00	19.8	3	140	-9997		19.7	2.3	255.2	89.2			2019-04-11 18:00:00	18.9	0.7	40	83		19	1	235	87.5			2019-04-11 18:00:00	16.2	1.2	28	97		17	1.5	344.2	91			2019-04-11 18:00:00	17.7	1.7	60	87		18.7	1.8	35.5	81.9			2019-04-11 18:00:00	18.1
2019-04-11 19:00:00	19	2.7	170	-9997		19.1	1.2	264.8	86.3			2019-04-11 19:00:00	18.3	1.1	220	89		18.7	1.2	250.4	87.6			2019-04-11 19:00:00	16.4	1	138	98		17	0.3	248.7	92.5			2019-04-11 19:00:00	17.7	1.5	90	88		18.4	1.4	23.4	83.4			2019-04-11 19:00:00	18.2
2019-04-11 20:00:00	18.6	0.9	150	-9997		19	1	276.6	89.1			2019-04-11 20:00:00	18.3	0.2	0	90		18.6	0.3	301.7	90.3			2019-04-11 20:00:00	16.3	0.6	169	98		17.2	0.3	262.6	92.8			2019-04-11 20:00:00	18.1	1.4	80	88		18.3	0.8	94.1	86.7			2019-04-11 20:00:00	18.1
2019-04-11 21:00:00	18.7	0.6	160	-9997		19	0.7	314.4	89.2			2019-04-11 21:00:00	18.4	0.5	270	92		19	0.7	253.7	88			2019-04-11 21:00:00	16.4	0.6	204	98		17.1	0.4	12.2	95.9			2019-04-11 21:00:00	18.1	2.3	140	89		18.3	1.7	133.3	88.3			2019-04-11 21:00:00	-999.7
2019-04-11 22:00:00	18.7	1.1	160	-9997		18.9	1.2	182.9	92.5			2019-04-11 22:00:00	18.3	1	40	92		18.8	1.2	333.3	91.1			2019-04-11 22:00:00	16.7	0.7	11	98		17.4	1.3	55.9	96.8			2019-04-11 22:00:00	18.3	1.6	20	89		18.4	1.4	81.3	88.7			2019-04-11 22:00:00	18.5
2019-04-11 23:00:00	18.9	1.5	80	-9997		18.9	1.7	137.4	89.3			2019-04-11 23:00:00	18.5	1.5	30	92		18.9	1.6	26.3	89			2019-04-11 23:00:00	16.6	2.8	22	97		17.1	1.8	61.8	97.7			2019-04-11 23:00:00	18.7	2.6	60	88		18.6	2.7	52.3	88.6			2019-04-11 23:00:00	18.6
2019-04-12	18.7	2.7	90	-9997		19	2.1	63.3	82.8			2019-04-12	18	0.3	80	92		18.7	0.4	149	89.2			2019-04-12	16.2	2.2	30	98		16.9	1.7	46.6	97.8			2019-04-12	18.6	2.5	40	86		18.6	2.8	49.3	88.4			2019-04-12	18.6
2019-04-12 01:00:00	18.7	3	80	-9997		18.7	3.1	58.3	82.5			2019-04-12 01:00:00	17.9	0.9	360	92		18.5	0.6	279	86.7			2019-04-12 01:00:00	15.8	2.7	25	98		16.6	2.7	34.4	95.3			2019-04-12 01:00:00	18.4	2.8	30	85		18.4	3.1	42.1	87.6			2019-04-12 01:00:00	18.5
2019-04-12 02:00:00	18.7	2.4	100	-9997		18.5	2.6	61.4	82.3			2019-04-12 02:00:00	17.7	0.6	10	92		18.2	0.6	10.9	87.7			2019-04-12 02:00:00	15.5	2.8	25	98		16.3	2.9	37.4	94.7			2019-04-12 02:00:00	18.1	2.3	40	84		18.3	2.7	41.8	84.3			2019-04-12 02:00:00	18.2
2019-04-12 03:00:00	18.6	2.6	90	-9997		18.2	2.3	72.2	82.3			2019-04-12 03:00:00	17.6	0.8	80	89		18	0.8	265.7	87			2019-04-12 03:00:00	15.4	2.2	24	96		16.3	1.5	42.1	94.7			2019-04-12 03:00:00	18	2.6	40	81		18	2.9	48.8	84			2019-04-12 03:00:00	17.9
2019-04-12 04:00:00	18.8	2.8	80	-9997		17.9	1.2	99.4	84			2019-04-12 04:00:00	18.1	1.3	50	86		18.2	1	118.8	83.5			2019-04-12 04:00:00	15.7	2	43	95		16.1	0.7	69.3	94.9			2019-04-12 04:00:00	18.2	2.4	20	79		18.2	2.5	56.9	80.4			2019-04-12 04:00:00	17.7
2019-04-12 05:00:00	18.6	2.4	80	-9997		18.2	2.6	92.9	81.9			2019-04-12 05:00:00	18.5	1.8	70	81		18.2	1.7	114.5	82.1			2019-04-12 05:00:00	15.7	2.4	28	93		16	2.2	50.3	93.6			2019-04-12 05:00:00	18.2	1.8	30	78		18.2	2.2	58.4	80.3			2019-04-12 05:00:00	17.8
2019-04-12 06:00:00	18.6	4.1	90	-9997		18.3	3	65.8	75.7			2019-04-12 06:00:00	18.4	1.9	70	76		18.5	1.4	78.2	75.8			2019-04-12 06:00:00	15.4	2.7	27	89		16	0.9	44.9	93.4			2019-04-12 06:00:00	18.1	2.8	40	75		18.1	3	45.5	77.4			2019-04-12 06:00:00	17.8
2019-04-12 07:00:00	18.6	4	80	-9997		18.3	2.4	81.3	76.8			2019-04-12 07:00:00	18.5	2.8	70	75		18.3	2	104.9	76.7			2019-04-12 07:00:00	15.7	2.8	37	89		16	1.4	53.4	91.2			2019-04-12 07:00:00	18.2	2.9	30	75		18.2	3.1	49.9	76.3			2019-04-12 07:00:00	17.8
2019-04-12 08:00:00	18.8	4.5	110	74		18.5	3.7	75.4	76.3			2019-04-12 08:00:00	18.6	2.8	70	77		18.5	2.6	95.2	77.8			2019-04-12 08:00:00	16.1	3.2	41	88		16.4	1.9	57.5	86.4			2019-04-12 08:00:00	18.8	3.2	40	74		18.6	3.4	57.4	74.5			2019-04-12 08:00:00	18.3
2019-04-12 09:00:00	19.3	4.7	90	72		19.2	4	73.5	72.6			2019-04-12 09:00:00	19.2	2.7	60	73		19.5	2.8	79.6	71.4			2019-04-12 09:00:00	17.2	4.7	35	82		17.9	2.9	52.5	79			2019-04-12 09:00:00	19.6	2.9	40	72		19.8	3.2	52.9	70.3			2019-04-12 09:00:00	20
2019-04-12 10:00:00	19.5	5.2	70	-9997		19.1	4	87.9	75.5			2019-04-12 10:00:00	19.4	3.8	70	74		19.6	3.4	90.8	74.1			2019-04-12 10:00:00	18.2	3.8	33	80		18.7	2.6	58.3	76.7			2019-04-12 10:00:00	20.5	3.5	10	69		21	3.7	45.4	66.5			2019-04-12 10:00:00	20.7
2019-04-12 11:00:00	20.2	5	80	83		19.6	4.1	82.6	76.9			2019-04-12 11:00:00	20	4.5	60	73		20.1	3.6	84.3	75.9			2019-04-12 11:00:00	18.1	3.6	27	81		19.5	2.3	48.4	75.5			2019-04-12 11:00:00	21.7	2.4	40	68		22.2	2.8	42.4	63.8			2019-04-12 11:00:00	21.8
2019-04-12 12:00:00	21.1	3.7	80	-9997		19.7	3.8	82.8	75.6			2019-04-12 12:00:00	20.1	5.5	80	72		20.2	2.6	74.7	74.6			2019-04-12 12:00:00	18.8	3.7	31	78		19.8	4.1	50.9	78			2019-04-12 12:00:00	21.9	3.4	30	67		22.7	3.8	55.3	63.8			2019-04-12 12:00:00	22.4
2019-04-12 13:00:00	21.1	4.1	90	-9997		20.1	4.2	72.6	72.5			2019-04-12 13:00:00	20.4	5.3	60	70		21	4.7	67.1	68.9			2019-04-12 13:00:00	19.3	3.9	46	76		20.3	4.2	53.6	72.3			2019-04-12 13:00:00	22.6	3.6	50	65		22.4	4	50.7	66.8			2019-04-12 13:00:00	22.4
2019-04-12 14:00:00	20.4	7.3	80	-9997		20.1	5.8	82.7	73.6			2019-04-12 14:00:00	20.8	4.9	70	69		20.7	4.6	67.3	70.6			2019-04-12 14:00:00	19.6	4.1	39	76		20.6	4.4	52.5	70.5			2019-04-12 14:00:00	22.2	3.3	20	66		23.4	3.6	50.8	60.9			2019-04-12 14:00:00	22.8
2019-04-12 15:00:00	20.4	5.3	100	-9997		20.3	5	68.8	68.2			2019-04-12 15:00:00	20.5	3.5	70	70		20.9	3.4	81.6	66.6			2019-04-12 15:00:00	18.7	3.4	50	78		19.8	3.9	51.8	73.9			2019-04-12 15:00:00	22.1	3.4	40	65		23.1	3.6	54.9	61.4			2019-04-12 15:00:00	23
2019-04-12 16:00:00	20.3	7.3	80	-9997		20.2	5.7	75.5	71.3			2019-04-12 16:00:00	20.2	3.3	60	68		20.2	3.6	73.2	71.1			2019-04-12 16:00:00	18.1	4.1	41	78		19.6	3.7	53.5	73			2019-04-12 16:00:00	21.1	2.7	50	68		22	3	53.4	63.7			2019-04-12 16:00:00	22.3
2019-04-12 17:00:00	20.3	5.6	100	65		20	4.9	78.1	68.4			2019-04-12 17:00:00	20.1	3.3	80	69		20.2	3.5	77	68.1			2019-04-12 17:00:00	17.9	3	44	78		19	3.3	52.9	74.5			2019-04-12 17:00:00	20.7	3	60	67		21.2	3.2	59.7	66.2			2019-04-12 17:00:00	21.5
2019-04-12 18:00:00	20.3	5.5	80	-9997		19.8	4.7	83.6	68.5			2019-04-12 18:00:00	20.2	3	60	65		19.9	3.1	76.7	69.2			2019-04-12 18:00:00	17.9	3.2	52	77		18.1	2.5	59.4	77.6			2019-04-12 18:00:00	20.4	1.8	70	68		18.8	2.2	58.5	80.5			2019-04-12 18:00:00	20.6
2019-04-12 19:00:00	20.1	5.4	100	-9997		19.2	4.6	88	73.7			2019-04-12 19:00:00	19.9	3.8	60	68		19.3	3.3	74.9	74.5			2019-04-12 19:00:00	17.7	2.6	50	78		17.3	2.3	64.4	84.3			2019-04-12 19:00:00	20.1	1.4	60	68		19	1.7	50.2	77.8			2019-04-12 19:00:00	20.1
2019-04-12 20:00:00	20.1	5.1	90	-9997		19.1	4.8	94.7	75.1			2019-04-12 20:00:00	19.8	4.7	70	70		19.2	4	76.2	74.7			2019-04-12 20:00:00	17.6	3	62	79		17.4	2.6	75.8	84.9			2019-04-12 20:00:00	20.1	1.4	40	69		19.3	1.6	71.4	75.3			2019-04-12 20:00:00	19.8
2019-04-12 21:00:00	20.2	4.7	100	-9997		19.4	4.3	82	72.9			2019-04-12 21:00:00	20	4.2	60	70		19.6	2.1	69	71.9			2019-04-12 21:00:00	17.8	2.5	34	79		17.3	2.4	68	86.8			2019-04-12 21:00:00	20.1	1.5	50	69		19.4	1.9	66.2	75.6			2019-04-12 21:00:00	19.9
2019-04-12 22:00:00	20	4.7	90	-9997		18.9	4	72.5	77.8			2019-04-12 22:00:00	19.9	3.4	60	72		19.3	3.1	50.7	76.2			2019-04-12 22:00:00	17.7	2.2	64	81		17.4	1.9	74.5	87			2019-04-12 22:00:00	19.9	1.7	80	71		19.1	1.9	79.1	79.3			2019-04-12 22:00:00	19.5
2019-04-12 23:00:00	19.9	4.6	80	-9997		19.1	4.2	66.7	78.7			2019-04-12 23:00:00	20	3.5	50	72		19.4	3.2	43.9	77.7			2019-04-12 23:00:00	17.7	1.3	70	83		17.7	1.3	66.1	87.1			2019-04-12 23:00:00	19.9	1.3	70	72		19.4	1.1	79.1	76			2019-04-12 23:00:00	18.5
2019-04-13	19.4	4.5	70	-9997		18.9	4.3	76.8	82.1			2019-04-13	19.5	2.5	60	78		19.1	2.3	59.7	82.5			2019-04-13	17.4	1.4	143	87		17.2	1.6	97.8	92.3			2019-04-13	18.8	1.7	120	80		18.9	1.4	99.7	81.3			2019-04-13	18.5
2019-04-13 01:00:00	18.9	3	70	-9997		18.7	3	76.6	86.2			2019-04-13 01:00:00	19	3.5	50	84		18.9	2.6	50.6	86			2019-04-13 01:00:00	16.7	0.9	105	95		17	1.4	87.2	94.4			2019-04-13 01:00:00	18.6	2	80	84		18.6	1.6	71.3	85.9			2019-04-13 01:00:00	18.4
2019-04-13 02:00:00	19.3	4.7	100	-9997		19.1	3.6	90.9	85.2			2019-04-13 02:00:00	19.2	3.4	50	83		19.2	3	38.9	85.7			2019-04-13 02:00:00	16.6	0.8	48	96		16.9	1.6	83.3	96.2			2019-04-13 02:00:00	18.8	0.7	340	85		18.5	0.9	78.9	88.7			2019-04-13 02:00:00	18.2
2019-04-13 03:00:00	19.7	3.7	80	-9997		19.1	3.2	70.2	86.7			2019-04-13 03:00:00	19.6	2.9	50	81		19.3	2.7	31.8	85			2019-04-13 03:00:00	16.7	0.9	133	95		16.9	1	57.5	97.1			2019-04-13 03:00:00	18.8	0.5	120	86		18.9	0.6	359.1	87			2019-04-13 03:00:00	18.4
2019-04-13 04:00:00	19.8	2.3	70	-9997		19.5	1.5	61.9	83.6			2019-04-13 04:00:00	19	0.2	0	85		19.6	0.3	3.1	84			2019-04-13 04:00:00	16.9	1	200	96		17.2	0.4	87.3	95.2			2019-04-13 04:00:00	18.8	1.2	90	86		19	1	189.5	85.9			2019-04-13 04:00:00	18.8
2019-04-13 05:00:00	19.8	1.1	110	-9997		19.1	1.2	76.9	86.2			2019-04-13 05:00:00	18.7	0	0	88		19.5	0.3	341.3	85			2019-04-13 05:00:00	16.6	0	0	97		17.4	0.5	109.4	92.7			2019-04-13 05:00:00	18.6	0	0	87		18.9	0.2	252.2	86.5			2019-04-13 05:00:00	19.4
2019-04-13 06:00:00	19.7	0.4	150	-9997		19.1	0.6	74.7	88.2			2019-04-13 06:00:00	18.8	0.6	200	89		19.4	0.6	21.3	87.3			2019-04-13 06:00:00	16.5	0.3	206	98		17.2	0.4	85.8	94			2019-04-13 06:00:00	18.4	0.5	80	89		18.9	0.4	271.1	86.9			2019-04-13 06:00:00	19.2
2019-04-13 07:00:00	20.5	0.7	110	-9997		20.5	0.7	77.3	82.3			2019-04-13 07:00:00	19.6	0.2	0	90		20.3	0.3	69.3	84.3			2019-04-13 07:00:00	17.8	0	0	97		18.1	0.3	60.6	91.9			2019-04-13 07:00:00	19.5	0.8	80	88		19.4	0.6	307.1	87			2019-04-13 07:00:00	19.8
2019-04-13 08:00:00	22.3	0.5	130	75		22.4	0.2	94.9	75.6			2019-04-13 08:00:00	21.5	0.2	0	76		22	0.3	114.3	76.4			2019-04-13 08:00:00	19.7	1	139	86		20	0.5	96.8	85			2019-04-13 08:00:00	21.6	0.5	120	80		21.2	0.5	281.8	80.8			2019-04-13 08:00:00	21.8
2019-04-13 09:00:00	23	0.1	0	-9997		24.1	0.1	304.4	67.7			2019-04-13 09:00:00	22.5	0.1	0	74		23.9	0.1	76.2	67.7			2019-04-13 09:00:00	20.7	0.4	96	84		21.7	0.3	11.8	78.5			2019-04-13 09:00:00	22.7	0.3	70	76		23.2	0.3	303.7	72.9			2019-04-13 09:00:00	22.6
2019-04-13 10:00:00	25.1	0.4	110	-9997		25.3	0.5	324.1	60.8			2019-04-13 10:00:00	23.7	0.8	270	69		24.9	0.5	348	63.8			2019-04-13 10:00:00	22.5	0.2	0	77		22.9	0.3	21.3	73.1			2019-04-13 10:00:00	24.1	0.7	190	70		24.8	0.7	28	66.6			2019-04-13 10:00:00	23.2
2019-04-13 11:00:00	25.5	1	280	61		26	1.1	309.7	60.4			2019-04-13 11:00:00	25.1	1.2	230	68		26	1	303.5	60.2			2019-04-13 11:00:00	22.8	0.6	28	76		24	0.8	11.4	68.9			2019-04-13 11:00:00	24.5	1.7	300	71		25.7	1	285.2	65.2			2019-04-13 11:00:00	24
2019-04-13 12:00:00	23.9	1.8	320	-9997		25.8	1.9	320.1	64.3			2019-04-13 12:00:00	25.1	1.1	220	69		26.4	1.3	289.6	60.2			2019-04-13 12:00:00	21.7	0.5	326	83		24.3	0.9	313.4	66.8			2019-04-13 12:00:00	24.3	0.7	350	71		25.4	0.9	307.7	68			2019-04-13 12:00:00	25.1
2019-04-13 13:00:00	23.4	1.4	330	-9997		25.4	1.3	331.6	64.3			2019-04-13 13:00:00	23.7	1.6	300	72		26.2	0.6	309.5	63.2			2019-04-13 13:00:00	21	0.8	325	82		23.9	1	297	68.8			2019-04-13 13:00:00	23.2	0.9	360	76		24.9	1.1	300	69.4			2019-04-13 13:00:00	23.7
2019-04-13 14:00:00	21.8	0.6	300	92		24.1	0.8	334.9	77.2			2019-04-13 14:00:00	21.8	1.3	40	85		25	1.3	221.7	73.1			2019-04-13 14:00:00	20.1	0.3	324	92		23.1	1.3	321.4	71.2			2019-04-13 14:00:00	22.8	1.9	360	79		24.3	1.8	310.3	72			2019-04-13 14:00:00	21.8
2019-04-13 15:00:00	22.1	0.8	260	-9997		23	0.6	336.7	85.6			2019-04-13 15:00:00	21.3	0.1	0	88		23.5	0.3	298.2	79.8			2019-04-13 15:00:00	19.8	0	0	94		22.4	0.3	278.6	77.4			2019-04-13 15:00:00	22.1	0.9	40	82		24.2	0.8	360	72.2			2019-04-13 15:00:00	21
2019-04-13 16:00:00	22	1.2	270	-9997		22.7	1	306.4	86.1			2019-04-13 16:00:00	21.4	0.9	240	89		22.8	1.2	285.8	83.1			2019-04-13 16:00:00	19.9	0.3	34	97		21.1	0.8	338.8	86.4			2019-04-13 16:00:00	20.8	3.1	360	86		23.1	2.7	68.6	76			2019-04-13 16:00:00	20.9
2019-04-13 17:00:00	22.2	1.2	210	86		22.6	0.9	351.1	85.6			2019-04-13 17:00:00	21.4	1.1	210	89		23	1	292.2	81.3			2019-04-13 17:00:00	19.8	0.8	27	98		20.8	1.2	311	87.5			2019-04-13 17:00:00	20.9	1	90	88		22.4	0.6	70.3	80.2			2019-04-13 17:00:00	20.4
2019-04-13 18:00:00	21.9	0.9	210	-9997		22.7	0.5	84.8	83.6			2019-04-13 18:00:00	21.4	0.7	200	89		22.7	0.8	234.3	82.1			2019-04-13 18:00:00	19.6	0.4	190	98		20.6	0.9	290.4	87.3			2019-04-13 18:00:00	21.1	1.8	120	88		22	1.6	141.3	83.9			2019-04-13 18:00:00	20.5
2019-04-13 19:00:00	21.6	0.8	180	-9997		22.2	0.4	293.5	86			2019-04-13 19:00:00	21	0.4	60	91		22.3	0.5	254.4	84.2			2019-04-13 19:00:00	19.6	1.3	208	98		20.5	0.9	313.6	88.3			2019-04-13 19:00:00	21	1.3	100	89		21.8	1.2	74.6	84.4			2019-04-13 19:00:00	20.9
2019-04-13 20:00:00	21.5	0.2	0	-9997		21.9	0.2	346.7	87.3			2019-04-13 20:00:00	20.8	0.5	290	92		21.9	0.6	268	86.1			2019-04-13 20:00:00	19.7	0.4	319	97		20	0.1	298.8	92.1			2019-04-13 20:00:00	21.2	0.6	320	89		21.9	0.6	16.9	84.8			2019-04-13 20:00:00	21
2019-04-13 21:00:00	21.9	0.7	250	-9997		21.9	0.6	298.1	88			2019-04-13 21:00:00	20.9	1.1	200	93		21.7	1.2	282.5	87.7			2019-04-13 21:00:00	19.7	0	0	98		19.8	0.6	48.8	93.2			2019-04-13 21:00:00	21.2	0.9	110	90		21.5	0.7	121.7	88.7			2019-04-13 21:00:00	21
2019-04-13 22:00:00	21.7	1	170	-9997		21.8	0.8	211.3	89.9			2019-04-13 22:00:00	20.7	0	0	93		21.6	0.6	248.8	87.9			2019-04-13 22:00:00	19.3	1	175	98		19.7	0.9	61.4	93.8			2019-04-13 22:00:00	20.9	2	110	90		21.4	0.5	109.9	89.4			2019-04-13 22:00:00	21
2019-04-13 23:00:00	21.6	0.7	130	-9997		21.7	0.3	88.6	90.5			2019-04-13 23:00:00	21	1.3	70	92		21.6	1	283.7	88			2019-04-13 23:00:00	19.2	0	0	98		19.6	1.3	38	95.4			2019-04-13 23:00:00	21	0.5	340	89		21.3	0.5	19.7	89.2			2019-04-13 23:00:00	20.9
2019-04-14	21.7	2	30	-9997		21.6	0.8	291.1	90.8			2019-04-14	21.2	0.6	40	92		21.5	0.6	264.1	89.2			2019-04-14	19.7	0.3	16	98		19.7	0.2	23.2	94.7			2019-04-14	21.2	1.8	70	89		21.1	1.6	120.8	90.3			2019-04-14	20.6
2019-04-14 01:00:00	21.7	0.2	0	-9997		21.4	0.3	263.8	90.9			2019-04-14 01:00:00	21.1	0.6	240	92		21.3	0.2	270	90.7			2019-04-14 01:00:00	19.6	0	0	98		19.8	0.4	327	94.3			2019-04-14 01:00:00	21.3	0.3	70	89		21	0.4	70.2	90.6			2019-04-14 01:00:00	20.9
2019-04-14 02:00:00	21.6	0.9	180	-9997		21.5	0.6	254.2	90.3			2019-04-14 02:00:00	21.1	0.6	30	92		21.4	0.7	195	91.3			2019-04-14 02:00:00	19.5	0.3	25	98		19.8	0.4	317.2	94.4			2019-04-14 02:00:00	21.4	0.8	60	88		21	0.9	78.8	90.2			2019-04-14 02:00:00	21
2019-04-14 03:00:00	21.5	1	160	-9997		21.2	0.7	229.3	92.9			2019-04-14 03:00:00	20.8	1.2	200	92		21.1	0.9	198.3	92.6			2019-04-14 03:00:00	19.4	0.6	39	99		19.8	0.5	197.1	93.5			2019-04-14 03:00:00	21.3	0.5	40	88		21	0.6	84.3	89.7			2019-04-14 03:00:00	20.9
2019-04-14 04:00:00	21.5	1.1	160	-9997		21.1	0.7	189.9	91.5			2019-04-14 04:00:00	20.7	0.8	220	93		21	0.8	206.7	92.7			2019-04-14 04:00:00	19.2	0.7	27	99		19.6	0.2	96.3	94.5			2019-04-14 04:00:00	21.2	1.3	70	88		21.1	1.1	52.1	89.3			2019-04-14 04:00:00	20.7
2019-04-14 05:00:00	21.3	1.2	160	-9997		21	1.2	167.3	90			2019-04-14 05:00:00	20.8	0.6	200	92		21	0.7	206.6	92.6			2019-04-14 05:00:00	19.2	0.6	34	99		19.6	0.5	141.7	94.4			2019-04-14 05:00:00	21.2	0.9	20	86		21.1	0.6	58.8	88.3			2019-04-14 05:00:00	-999.7
2019-04-14 06:00:00	21	0.9	120	-9997		21.1	0.2	179.1	88.7			2019-04-14 06:00:00	20.2	0	0	94		21	0.2	251	92.9			2019-04-14 06:00:00	19.2	0	0	99		19.5	0.1	336.4	95			2019-04-14 06:00:00	21.1	0.6	40	86		21.2	0.5	10	86.7			2019-04-14 06:00:00	20.3
2019-04-14 07:00:00	21.8	0.9	140	-9997		21.3	0.8	147.5	89.9			2019-04-14 07:00:00	21.1	0.4	80	92		21.3	0.3	246.9	92.1			2019-04-14 07:00:00	19.9	0.6	105	99		19.9	0.2	128.9	94.9			2019-04-14 07:00:00	22	0.8	50	86		21.5	0.6	91.8	87.5			2019-04-14 07:00:00	20.9
2019-04-14 08:00:00	23.3	1.1	110	81		22.5	0.6	230	84			2019-04-14 08:00:00	22.4	0.4	260	87		22.1	0.4	244.3	88			2019-04-14 08:00:00	20.9	0.5	97	95		21	0.2	213.4	89.3			2019-04-14 08:00:00	23.6	1.7	60	81		22.1	1.4	17.4	88			2019-04-14 08:00:00	21.9
2019-04-14 09:00:00	24.1	0.7	320	76		23.9	0.7	297.6	77			2019-04-14 09:00:00	23.9	1.7	60	78		23.6	0.9	18.5	79.8			2019-04-14 09:00:00	22.2	1.4	31	86		22.3	0.4	83.1	80.3			2019-04-14 09:00:00	24.8	1.8	360	76		24.3	1.3	92.7	76			2019-04-14 09:00:00	24.1
2019-04-14 10:00:00	25.3	0.3	999.9	-9997		24.9	0.5	304.2	73.1			2019-04-14 10:00:00	24.5	1	360	75		24.8	1	28.6	74.6			2019-04-14 10:00:00	23.6	0.9	54	82		23.9	0.9	0	76.6			2019-04-14 10:00:00	26.5	1.1	340	71		25.9	1.1	13.8	71.1			2019-04-14 10:00:00	-999.7
2019-04-14 11:00:00	26.6	1	330	68		25.8	1.2	309.6	71.3			2019-04-14 11:00:00	25.6	0.9	330	71		26	0.6	24.6	72.1			2019-04-14 11:00:00	24.2	1.3	22	76		25.3	1.1	326.7	71.8			2019-04-14 11:00:00	26.5	2.4	360	70		26.5	2.6	351.6	71.1			2019-04-14 11:00:00	26.2
2019-04-14 12:00:00	28.1	0.3	999.9	-9997		26.7	0.5	342.1	69.3			2019-04-14 12:00:00	26.5	1.4	80	65		27.2	1.2	330.8	67.2			2019-04-14 12:00:00	25.4	0.3	15	74		25.8	0.9	326.9	73.3			2019-04-14 12:00:00	28.2	2	30	66		26.8	2.4	357.4	70.8			2019-04-14 12:00:00	26.5
2019-04-14 13:00:00	27.3	1.1	60	-9997		25.4	1.5	42.7	73.8			2019-04-14 13:00:00	26.2	2	20	70		26.8	2.2	338.5	68.6			2019-04-14 13:00:00	24.4	1.3	8	78		25	1.5	353.7	78.3			2019-04-14 13:00:00	27.7	3	360	68		27.1	3.1	348.5	69.6			2019-04-14 13:00:00	27.2
2019-04-14 14:00:00	26	3.5	330	68		25.3	2.7	19.6	71.9			2019-04-14 14:00:00	24.8	3.2	20	70		26.3	2.9	346.1	66.4			2019-04-14 14:00:00	23	1.2	358	81		24.7	1.8	10.1	77.8			2019-04-14 14:00:00	25.8	3.4	360	71		26.7	3.3	3.3	67.3			2019-04-14 14:00:00	26
2019-04-14 15:00:00	23.3	0.8	60	-9997		24.2	0.6	342.5	76.1			2019-04-14 15:00:00	23.5	2.4	360	74		24.5	2.5	10.4	71.4			2019-04-14 15:00:00	21.1	1.9	17	85		23.4	2.7	38.5	77.7			2019-04-14 15:00:00	24.5	2.3	20	72		26.2	2.5	355.5	65.6			2019-04-14 15:00:00	25
2019-04-14 16:00:00	22.9	3.3	110	-9997		23.2	3	77.5	74.9			2019-04-14 16:00:00	23.3	1.6	30	75		24.3	1.1	347.7	73.4			2019-04-14 16:00:00	20.7	1.5	20	86		22.9	0.9	40.1	77.7			2019-04-14 16:00:00	23.7	2.5	50	73		25.2	2.8	61	67.9			2019-04-14 16:00:00	24.9
2019-04-14 17:00:00	23	2.2	100	75		22.9	2.3	86.2	74.6			2019-04-14 17:00:00	23.1	1.5	60	75		23.5	1.8	90.5	72.8			2019-04-14 17:00:00	21	0.7	355	85		22.2	1.4	29.7	78.1			2019-04-14 17:00:00	22.8	2.3	10	74		24.1	2.6	45.5	68.7			2019-04-14 17:00:00	24.3
2019-04-14 18:00:00	22.6	3.1	80	-9997		22.5	3.1	76.5	73.6			2019-04-14 18:00:00	22.3	2.6	40	73		22.8	2.3	66.8	73.9			2019-04-14 18:00:00	19.7	0.8	3	91		20.8	2.4	28.8	87.7			2019-04-14 18:00:00	21.7	2.7	10	81		22.8	3	36.3	74.6			2019-04-14 18:00:00	21.9
2019-04-14 19:00:00	22.4	2.6	90	-9997		21.9	2.9	71.4	74.6			2019-04-14 19:00:00	21.3	2.2	40	78		22.7	2.1	90.2	71.5			2019-04-14 19:00:00	19.5	2.6	20	89		20	2.3	43.2	90.5			2019-04-14 19:00:00	20.9	1.6	50	82		21.6	2	43.7	81.1			2019-04-14 19:00:00	21.3
2019-04-14 20:00:00	22.5	1.6	130	-9997		21.6	1.8	53.1	79.1			2019-04-14 20:00:00	20.8	0.3	40	85		22.1	0.5	68.6	76.4			2019-04-14 20:00:00	18.9	2.4	27	93		20	2.2	39.3	84.2			2019-04-14 20:00:00	20.9	2.5	50	81		21.4	2.9	35.1	80.3			2019-04-14 20:00:00	20.9
2019-04-14 21:00:00	21.5	3.5	100	-9997		21.3	3.2	51.9	80.6			2019-04-14 21:00:00	20.4	0.5	270	89		21.8	0.7	66.4	81			2019-04-14 21:00:00	18.4	1.8	61	98		19.4	1.6	48.3	91.1			2019-04-14 21:00:00	21.2	1.4	60	81		21.4	1.8	43.7	80.1			2019-04-14 21:00:00	20.9
2019-04-14 22:00:00	20.9	2.8	110	-9997		20.8	2.9	71.5	78.1			2019-04-14 22:00:00	20.5	2.5	70	81		21.2	2.1	88.7	78.5			2019-04-14 22:00:00	18.4	1.8	51	98		19	1.4	51.1	94.3			2019-04-14 22:00:00	20.6	3	20	83		21	3.2	42.5	81.9			2019-04-14 22:00:00	20.8
2019-04-14 23:00:00	20.5	2.6	100	-9997		20.7	2.8	65.1	78.4			2019-04-14 23:00:00	20	1.8	60	82		20.9	2.2	80.5	77.7			2019-04-14 23:00:00	18	2.6	52	92		18.8	3.2	46.8	88.8			2019-04-14 23:00:00	20.7	3.2	40	74		20.8	3.4	42.4	75.3			2019-04-14 23:00:00	20.7
2019-04-15	18.5	3.5	100	-9997		20	3.1	64.5	76.8			2019-04-15	19.4	3	70	84		20.1	2.7	82	78.8			2019-04-15	17.7	2.5	63	93		18.4	1.8	59.1	88.7			2019-04-15	20.3	2.3	60	75		20.4	2.7	51.5	76.8			2019-04-15	20.4
2019-04-15 01:00:00	18.8	3.2	100	86		19.7	3	75.1	78.2			2019-04-15 01:00:00	19.2	2.8	60	82		19.6	2.4	95.6	79.8			2019-04-15 01:00:00	17.1	3.8	36	89		17.7	2.3	57.1	88.7			2019-04-15 01:00:00	19.8	3.1	40	78		20.1	3.3	52	76.7			2019-04-15 01:00:00	20.1
2019-04-15 02:00:00	19.4	2.2	120	80		19.3	2.3	110.2	80.1			2019-04-15 02:00:00	19.5	2.2	70	76		19.4	2.3	107.3	79.3			2019-04-15 02:00:00	17.3	2.5	54	85		17.4	2.2	65.2	87.8			2019-04-15 02:00:00	19.5	2.4	60	74		19.5	2.8	65.2	77			2019-04-15 02:00:00	19.7
2019-04-15 03:00:00	19.7	2.4	120	78		19.6	2	104.4	76.5			2019-04-15 03:00:00	19.8	2	60	74		19.3	1.8	104.5	78.3			2019-04-15 03:00:00	17.6	2.9	48	82		17.6	1.9	63.2	83.9			2019-04-15 03:00:00	19.6	2.3	30	73		19.5	2.7	50	75.5			2019-04-15 03:00:00	19.7
2019-04-15 04:00:00	20.1	2.5	130	73		19.5	2.5	94.3	75.9			2019-04-15 04:00:00	19.8	1.8	70	73		19.5	1.9	95.1	76.8			2019-04-15 04:00:00	17.6	2.8	45	81		17.6	2.2	62.2	83.2			2019-04-15 04:00:00	19.7	2.2	40	71		19.7	2.7	48.4	72.9			2019-04-15 04:00:00	-999.7
2019-04-15 05:00:00	20.3	3.2	110	72		19.4	2.6	115.4	77.1			2019-04-15 05:00:00	19.7	1.9	70	72		19.4	1.8	111.7	76.9			2019-04-15 05:00:00	17.6	3.7	36	79		17.6	1.8	59.8	82.2			2019-04-15 05:00:00	19.7	3	20	71		19.8	3.4	38	72.2			2019-04-15 05:00:00	19.7
2019-04-15 06:00:00	20.3	2.1	110	71		19.7	2.1	111.6	75.8			2019-04-15 06:00:00	19.8	1.6	70	72		19.3	1.8	104.9	77.5			2019-04-15 06:00:00	17.6	3.4	41	79		17.8	2.3	60.1	80.6			2019-04-15 06:00:00	19.6	2.1	40	72		19.8	2.5	42.6	71.7			2019-04-15 06:00:00	19.7
2019-04-15 07:00:00	20.6	3.1	100	71		19.9	2.6	104.2	76.9			2019-04-15 07:00:00	20.4	2.1	60	69		19.8	2.2	107.1	75.2			2019-04-15 07:00:00	17.9	4.2	32	77		18.3	2.6	61.7	78.1			2019-04-15 07:00:00	20.1	2.3	40	71		20.1	2.8	40.4	70.3			2019-04-15 07:00:00	19.9
2019-04-15 08:00:00	21.2	2.7	90	69		20.9	2.6	93.4	67.7			2019-04-15 08:00:00	20.9	2.5	70	66		20.5	2.5	107.9	71			2019-04-15 08:00:00	18.6	3.8	34	74		18.7	2.9	61.5	78.2			2019-04-15 08:00:00	20.9	3.2	30	69		21	3.6	40.9	68.2			2019-04-15 08:00:00	20.5
2019-04-15 09:00:00	21	4	110	69		21.4	3.8	86.9	64.8			2019-04-15 09:00:00	20.7	3.4	60	68		21.5	3.4	96.4	64.1			2019-04-15 09:00:00	19	5.6	36	75		19.6	4.3	60	71.2			2019-04-15 09:00:00	21.8	4.5	20	65		22	4.4	44.3	61.4			2019-04-15 09:00:00	21.6
2019-04-15 10:00:00	21.1	4.5	110	68		21.3	4.4	80.5	63.6			2019-04-15 10:00:00	21	4	70	65		21.4	3.9	92.8	63.2			2019-04-15 10:00:00	18.8	6.2	42	74		20.1	4.9	55.4	71.5			2019-04-15 10:00:00	22.6	4.1	50	63		23	4.5	45.4	57.9			2019-04-15 10:00:00	22.6
2019-04-15 11:00:00	21.3	4.1	90	63		21.5	4	79.7	61.5			2019-04-15 11:00:00	21.1	3.4	60	64		21.7	3.7	94.1	60.9			2019-04-15 11:00:00	18.8	5.2	37	73		20.1	4.2	56.1	70.4			2019-04-15 11:00:00	21.4	3.3	50	64		22.9	3.9	48.8	58.8			2019-04-15 11:00:00	22.2
2019-04-15 12:00:00	21.2	5.7	90	63		21.7	3	84.9	60.5			2019-04-15 12:00:00	21.2	5	70	61		21.8	4.3	78.9	60.8			2019-04-15 12:00:00	18.6	4.8	29	74		20.3	4	58.7	67			2019-04-15 12:00:00	21.2	2.7	50	65		23	3.3	52.8	57.5			2019-04-15 12:00:00	21.3
2019-04-15 13:00:00	21.8	5.9	100	63		21.5	3.9	95.4	62.8			2019-04-15 13:00:00	21.9	3.9	70	64		21.6	4	81.5	62.7			2019-04-15 13:00:00	19.2	4.8	38	72		20	4.7	60.8	68.7			2019-04-15 13:00:00	22	2.9	60	62		22.8	3.3	64	58.7			2019-04-15 13:00:00	20.2
2019-04-15 14:00:00	22.1	6	100	61		21.2	5	94.1	64.4			2019-04-15 14:00:00	22.6	4.6	60	62		21.9	4.4	77.3	61.7			2019-04-15 14:00:00	19.2	4.1	59	72		20.6	3.9	65.3	65.8			2019-04-15 14:00:00	20.9	2.8	60	67		23	3.2	59.2	58.9			2019-04-15 14:00:00	20.2
2019-04-15 15:00:00	21.7	7.1	90	61		21.2	5.2	97.6	64.4			2019-04-15 15:00:00	21.7	3.8	60	61		21.7	4	103.1	61.9			2019-04-15 15:00:00	18.9	3.5	46	75		20.3	4	64.2	67.2			2019-04-15 15:00:00	21.4	3	80	67		22.9	3.4	58.8	59.3			2019-04-15 15:00:00	19.7
2019-04-15 16:00:00	21.2	6.8	100	61		21.2	5	86.8	63.8			2019-04-15 16:00:00	20.8	2.8	60	65		21.5	3.3	97.7	61.1			2019-04-15 16:00:00	18.5	3.8	34	76		20	3.9	62.3	67.1			2019-04-15 16:00:00	20.3	1.8	40	73		22	2.2	58.8	62.6			2019-04-15 16:00:00	20.1
2019-04-15 17:00:00	18.9	5.7	80	79		20.8	4.7	99.8	66.9			2019-04-15 17:00:00	20.2	3.1	50	69		21	3.4	84.3	66.1			2019-04-15 17:00:00	18	2.7	60	78		19.3	2.7	61.5	71.8			2019-04-15 17:00:00	20.1	2.5	50	72		21	3.1	58.1	66.2			2019-04-15 17:00:00	19.9
2019-04-15 18:00:00	19.2	4.6	90	77		19.9	4.2	92.9	68.9			2019-04-15 18:00:00	19.6	4.5	60	69		20.2	4.1	72.3	69			2019-04-15 18:00:00	17.3	2.9	44	83		18.2	3	59.9	79			2019-04-15 18:00:00	19.7	2.4	40	73		20.2	2.9	54.1	69.7			2019-04-15 18:00:00	19.5
2019-04-15 19:00:00	19.1	4.9	90	77		19.4	4.6	84.4	72.6			2019-04-15 19:00:00	19.9	3.4	60	69		19.8	3.5	67.6	70.7			2019-04-15 19:00:00	17.4	3	50	80		17.9	3	58.2	78.3			2019-04-15 19:00:00	19.7	1.7	40	73		19.7	2.1	56.4	71.7			2019-04-15 19:00:00	19.3
2019-04-15 20:00:00	19.7	4	80	71		19.4	3.8	90.4	73.5			2019-04-15 20:00:00	19.8	4.3	60	69		19.6	3.7	65.5	72			2019-04-15 20:00:00	17.5	2.5	44	80		17.8	2.4	66.2	77.7			2019-04-15 20:00:00	19.7	1.9	30	71		19.6	2.3	62.1	71.2			2019-04-15 20:00:00	18.7
2019-04-15 21:00:00	19.9	5.3	90	71		19.5	4.5	77.3	72			2019-04-15 21:00:00	20.1	4.6	60	68		19.7	3.9	55.7	71.5			2019-04-15 21:00:00	17.7	2.6	52	79		17.9	1.9	65	77.8			2019-04-15 21:00:00	19.1	0.8	70	77		19.4	1	67.9	73.6			2019-04-15 21:00:00	18.8
2019-04-15 22:00:00	19.4	4.7	100	75		19.7	4.2	74.9	73.3			2019-04-15 22:00:00	19.9	4.2	60	69		19.7	3.7	52.3	72.3			2019-04-15 22:00:00	17.2	2.2	67	85		17.6	1.3	68.3	80.5			2019-04-15 22:00:00	19.3	1.1	70	76		19.4	1.3	76.6	74.9			2019-04-15 22:00:00	18.6
2019-04-15 23:00:00	18	5.4	60	87		19.1	4.7	66.7	80.5			2019-04-15 23:00:00	19.1	3.7	60	81		19.3	3.5	45.3	79.6			2019-04-15 23:00:00	17.1	1.8	70	88		17.5	1.5	69.3	82.9			2019-04-15 23:00:00	19.1	1.6	90	78		19	1.5	77.2	78.1			2019-04-15 23:00:00	18.8
2019-04-16	18.6	4.6	90	85		19.1	3.6	68.9	83			2019-04-16	19.4	3	50	78		19.3	2.4	43.5	81.7			2019-04-16	17	1.5	95	90		17.5	0.8	81.8	88.2			2019-04-16	19.2	0.4	130	78		19.2	0.5	128.2	77.6			2019-04-16	-999.7
2019-04-16 01:00:00	19.1	3.5	90	84		19.1	2.8	69.4	85			2019-04-16 01:00:00	19.6	1.7	50	79		19.4	1.5	35.7	83			2019-04-16 01:00:00	16.9	0.6	197	93		17.1	0.6	89.4	90.3			2019-04-16 01:00:00	18.8	0.4	120	82		19.1	0.4	211.3	80.1			2019-04-16 01:00:00	18.4
2019-04-16 02:00:00	18.5	3.3	90	90		19.1	2.6	72.7	88			2019-04-16 02:00:00	19.2	1	30	84		19.4	0.9	49.3	85.5			2019-04-16 02:00:00	16.9	0	0	93		17.4	0.2	90.8	88.3			2019-04-16 02:00:00	19.3	0.4	350	80		19.2	0.4	207.5	80.7			2019-04-16 02:00:00	18.6
2019-04-16 03:00:00	18.7	0.7	90	92		19.4	0.7	75.2	88.3			2019-04-16 03:00:00	19	0.2	0	89		19.1	0.2	52.4	88.8			2019-04-16 03:00:00	17.2	0	0	91		17.4	0.1	304.9	89.1			2019-04-16 03:00:00	19.1	0.9	70	81		19.1	0.7	250.6	81.7			2019-04-16 03:00:00	-999.7
2019-04-16 04:00:00	18.6	0.9	180	95		18.7	0.6	133.2	92.8			2019-04-16 04:00:00	18.4	1.2	210	91		18.9	0.7	206.4	90.7			2019-04-16 04:00:00	17	0.8	202	96		17.7	0.5	227.5	87.2			2019-04-16 04:00:00	18.3	1.4	160	86		18.9	1.2	226.8	83.9			2019-04-16 04:00:00	-999.7
2019-04-16 05:00:00	18.3	0.8	200	97		18.6	0.7	215.2	92.6			2019-04-16 05:00:00	18.3	1.1	200	92		18.8	0.7	231.6	92.4			2019-04-16 05:00:00	16.6	1.3	214	98		17.1	0.4	258.2	92.8			2019-04-16 05:00:00	18	0.1	0	90		18.4	0.1	157.4	88.7			2019-04-16 05:00:00	18.4
2019-04-16 06:00:00	18.4	1	130	96		18.6	1	233	93.1			2019-04-16 06:00:00	18.2	1.1	210	93		18.7	0.9	208.2	90.4			2019-04-16 06:00:00	16.8	0	0	98		17.6	1	243	92.1			2019-04-16 06:00:00	18.2	0.1	0	91		18.3	0.2	168.8	90.4			2019-04-16 06:00:00	-999.7
2019-04-16 07:00:00	18.4	1	110	96		18.7	1	264	93			2019-04-16 07:00:00	18.3	0.7	250	94		18.8	0.5	239.1	90.2			2019-04-16 07:00:00	16.9	0	0	98		17.6	1.9	234.8	93.7			2019-04-16 07:00:00	18.2	0.5	350	90		18.2	0.5	197.9	92.3			2019-04-16 07:00:00	-999.7
2019-04-16 08:00:00	19	0.4	200	94		18.8	0.5	241.4	93.5			2019-04-16 08:00:00	18.8	0.7	30	93		18.8	0.6	211.1	93.4			2019-04-16 08:00:00	17	0.7	46	98		17.8	0.9	269.3	97.1			2019-04-16 08:00:00	18.8	0.4	210	91		18.1	0.5	183.8	95.7			2019-04-16 08:00:00	18.2
2019-04-16 09:00:00	19.7	1.3	210	95		19.1	1.2	272.3	95.9			2019-04-16 09:00:00	19.2	0.3	140	93		19.1	0.3	239.4	93.4			2019-04-16 09:00:00	17.3	0	0	98		18	0.5	175.4	95.9			2019-04-16 09:00:00	19.1	0.4	170	90		18.6	0.4	57.1	94			2019-04-16 09:00:00	18.4
2019-04-16 10:00:00	20	1.3	210	91		19.5	1.2	236.6	95.5			2019-04-16 10:00:00	19.6	1.3	210	92		19.7	1	357.6	91.7			2019-04-16 10:00:00	17.8	0.4	176	98		18.3	0.5	210.7	95			2019-04-16 10:00:00	19.2	1.1	130	89		19	1	115.3	91.7			2019-04-16 10:00:00	18.8
2019-04-16 11:00:00	20.3	1.1	200	93		19.9	1	233.8	94.5			2019-04-16 11:00:00	19.4	1.2	230	93		19.8	1	346.7	90.2			2019-04-16 11:00:00	17.8	0	0	98		18.5	0.6	43.8	93.3			2019-04-16 11:00:00	19.1	0.2	0	91		19.3	0.2	121.8	91.5			2019-04-16 11:00:00	-999.7
2019-04-16 12:00:00	20.1	1.9	230	93		19.9	1.5	286	94.1			2019-04-16 12:00:00	19.6	1.5	210	93		20	0.9	308.5	91.1			2019-04-16 12:00:00	18.1	0.3	198	98		18.4	0.3	44.9	94.9			2019-04-16 12:00:00	19.9	0.3	120	90		19.7	0.3	169.8	90.4			2019-04-16 12:00:00	18.8
2019-04-16 13:00:00	20.2	1.1	300	93		20.4	1.4	277.1	90.8			2019-04-16 13:00:00	19.6	1.4	220	93		20.3	1.4	199.1	89.8			2019-04-16 13:00:00	18.5	0	0	98		18.7	0.3	308.7	94.6			2019-04-16 13:00:00	19.8	0.9	180	90		20.2	0.8	82.2	88.4			2019-04-16 13:00:00	19.1
2019-04-16 14:00:00	20.3	1.6	310	97		20.2	1.1	255.1	93.9			2019-04-16 14:00:00	19.9	0.6	290	93		20.3	0.7	232.2	92.6			2019-04-16 14:00:00	18.3	0	0	98		18.9	0.3	312	93.5			2019-04-16 14:00:00	20	0	0	91		19.9	0.1	292.1	92.6			2019-04-16 14:00:00	19.6
2019-04-16 15:00:00	20	1.6	300	96		20.4	1.2	298.3	90.6			2019-04-16 15:00:00	19.9	0.1	0	92		19.9	0.2	315.5	93.8			2019-04-16 15:00:00	18.2	0	0	98		19	0.3	290.6	92.8			2019-04-16 15:00:00	20.3	0.2	0	89		20.2	0.2	216.3	90.1			2019-04-16 15:00:00	19.9
2019-04-16 16:00:00	20	1.1	310	96		19.7	1.4	304.1	93.7			2019-04-16 16:00:00	19.6	0.8	300	93		19.8	1	323.8	92.3			2019-04-16 16:00:00	18.4	0	0	98		18.9	0.9	283.5	97.7			2019-04-16 16:00:00	20.2	0.7	310	89		20.2	0.8	244.1	91.5			2019-04-16 16:00:00	20.3
2019-04-16 17:00:00	19.6	1.7	320	96		19.5	1.8	299.9	94.9			2019-04-16 17:00:00	19.4	0.6	310	92		19.8	0.6	288.1	92			2019-04-16 17:00:00	17.7	0	0	98		18.5	1.1	313.5	98.9			2019-04-16 17:00:00	19.9	0.4	10	88		19.8	0.5	349.7	91.8			2019-04-16 17:00:00	20.2
2019-04-16 18:00:00	19.7	1.8	310	95		19.5	1.6	301	92.2			2019-04-16 18:00:00	19.3	0.8	260	92		19.5	0.4	346.3	93.5			2019-04-16 18:00:00	17.5	0.4	5	98		18.3	0.7	282.6	98			2019-04-16 18:00:00	19.5	1.9	360	87		19.7	1.3	15.9	88.7			2019-04-16 18:00:00	20.2
2019-04-16 19:00:00	19.8	1.8	300	92		19.5	2	284.2	92.5			2019-04-16 19:00:00	19.3	0.5	280	91		19.4	0.6	303.9	92.6			2019-04-16 19:00:00	17.3	0	0	98		18	0.1	319.8	98.1			2019-04-16 19:00:00	19.3	1.1	30	87		19.3	1	44.4	89.8			2019-04-16 19:00:00	19.8
2019-04-16 20:00:00	19.9	1.2	270	92		19.5	1.3	278.8	92.3			2019-04-16 20:00:00	19.3	1.1	210	92		19.5	0.8	303	92.3			2019-04-16 20:00:00	17.5	0	0	98		17.9	0.6	342.1	97.9			2019-04-16 20:00:00	19.4	0.9	100	88		19.4	0.8	356.5	88.6			2019-04-16 20:00:00	19.7
2019-04-16 21:00:00	19.9	1	290	91		19.6	1.1	288.4	91.2			2019-04-16 21:00:00	19.4	0.5	220	92		19.6	0.5	293.8	91.6			2019-04-16 21:00:00	17.5	0	0	98		18.1	0.2	257.7	96.8			2019-04-16 21:00:00	19.3	1.1	70	89		19.5	0.8	116.2	89.6			2019-04-16 21:00:00	19.6
2019-04-16 22:00:00	19.9	1	310	92		19.5	0.9	267.2	92.5			2019-04-16 22:00:00	19.4	0.2	0	92		19.5	0.3	252.2	92.6			2019-04-16 22:00:00	17.6	0	0	98		18	0.4	325.5	96.7			2019-04-16 22:00:00	19.4	0.3	20	88		19.5	0.4	356.5	88.7			2019-04-16 22:00:00	19.6
2019-04-16 23:00:00	19.6	0.3	270	93		19.6	0.5	280.6	92.9			2019-04-16 23:00:00	19.4	0.4	200	93		19.5	0.4	235.6	93.8			2019-04-16 23:00:00	17.7	0	0	98		17.8	0	16.6	99.3			2019-04-16 23:00:00	19.5	0.5	80	88		19.5	0.5	64.6	88.6			2019-04-16 23:00:00	19.6
2019-04-17	19.8	1.1	320	89		19.4	1.3	306.4	92.9			2019-04-17	19.2	0.6	200	93		19.4	0.6	281.3	94.7			2019-04-17	17.7	0	0	98		17.9	0.4	267.7	100			2019-04-17	19.6	0.3	90	88		19.5	0.3	101.8	89			2019-04-17	19.6
2019-04-17 01:00:00	19.7	0.7	290	89		19.5	0.8	322.2	89.7			2019-04-17 01:00:00	19.5	0.2	0	91		19.5	0.3	5.2	91.3			2019-04-17 01:00:00	17.8	0.6	215	98		17.9	0.4	236	100			2019-04-17 01:00:00	19.4	0.9	120	89		19.5	0.5	270.2	89.2			2019-04-17 01:00:00	19.6
2019-04-17 02:00:00	20	0.8	290	86		19.6	1.1	308.6	88.7			2019-04-17 02:00:00	19.4	0.9	210	91		19.6	1	1.1	90.6			2019-04-17 02:00:00	17.8	0	0	98		18.1	0.4	291	100			2019-04-17 02:00:00	19.5	0.9	80	88		19.6	0.1	85.3	88.7			2019-04-17 02:00:00	19.5
2019-04-17 03:00:00	19.9	1.1	280	87		19.6	1.1	305.2	87.3			2019-04-17 03:00:00	19.3	0.6	230	92		19.7	0.7	358.5	88.1			2019-04-17 03:00:00	17.7	0.5	205	98		18.4	0.4	329.2	99.6			2019-04-17 03:00:00	19.6	0.1	0	89		19.5	0.1	105.7	90.4			2019-04-17 03:00:00	19.5
2019-04-17 04:00:00	19.9	1.6	230	91		19.6	1.3	295.7	89			2019-04-17 04:00:00	19.3	0.8	190	93		19.6	0.6	24.8	90.5			2019-04-17 04:00:00	17.8	0	0	98		18.1	1.1	320.1	100			2019-04-17 04:00:00	19.6	0.6	70	89		19.4	0.6	64.1	91.6			2019-04-17 04:00:00	19.4
2019-04-17 05:00:00	19.9	1	250	90		19.6	1.4	277.5	89.8			2019-04-17 05:00:00	19.3	0.6	220	92		19.5	0.4	232	92			2019-04-17 05:00:00	17.8	0	0	98		18.2	0.3	311.1	99.5			2019-04-17 05:00:00	19.5	0.7	80	89		19.4	0.6	54.4	91.1			2019-04-17 05:00:00	19.3
2019-04-17 06:00:00	19.9	1.3	230	92		19.6	1.3	300.8	89.7			2019-04-17 06:00:00	19.3	1.1	200	93		19.5	0.8	336.4	93			2019-04-17 06:00:00	17.7	0.4	132	98		18.1	1	65	98.1			2019-04-17 06:00:00	19.6	0.9	80	88		19.6	0.9	20.5	89.7			2019-04-17 06:00:00	19.3
2019-04-17 07:00:00	20.4	0.9	220	87		20.1	1	297.1	88.2			2019-04-17 07:00:00	19.7	0.8	190	92		19.8	0.7	188.3	91.3			2019-04-17 07:00:00	17.7	0.4	163	98		18.1	1.2	107.8	95.9			2019-04-17 07:00:00	20	1.3	80	87		19.9	1.1	69.3	88.6			2019-04-17 07:00:00	19.8
2019-04-17 08:00:00	21.6	0.8	220	77		21.2	0.9	316.2	79.5			2019-04-17 08:00:00	20.8	0.3	240	89		20.5	0.4	178	86.9			2019-04-17 08:00:00	19.4	0.6	67	93		18.9	1.3	108.5	89			2019-04-17 08:00:00	21.7	1.6	80	79		20.3	1.2	96.9	86.8			2019-04-17 08:00:00	21
2019-04-17 09:00:00	23.4	0.9	190	59		22.8	0.7	314.5	66.2			2019-04-17 09:00:00	22.8	0.3	260	68		22	0.4	193	74.9			2019-04-17 09:00:00	20.6	1.4	42	70		19.6	1	100.5	83.7			2019-04-17 09:00:00	23.5	2	30	67		21.6	1.2	75.3	76.8			2019-04-17 09:00:00	22.9
2019-04-17 10:00:00	25	0.7	210	55		24.2	1.1	310.6	61			2019-04-17 10:00:00	24.5	2.6	70	59		24.1	0.9	293	59.2			2019-04-17 10:00:00	22.4	1.5	59	67		21.3	0.3	93	73.9			2019-04-17 10:00:00	24.2	3	10	63		22.8	2.5	56.4	69.1			2019-04-17 10:00:00	24.3
2019-04-17 11:00:00	25.8	0.9	280	48		25	1.3	298.7	57			2019-04-17 11:00:00	26	1.7	80	51		25.1	1.7	346.6	53.6			2019-04-17 11:00:00	23.1	1.2	32	64		23.3	1.1	118.3	59.8			2019-04-17 11:00:00	25.5	2.2	20	60		24.7	0.9	285.5	62.7			2019-04-17 11:00:00	25.5
2019-04-17 12:00:00	26.5	0.9	260	52		25.3	1.1	294.6	55			2019-04-17 12:00:00	27	1.4	50	52		25.3	1.6	335.4	52.9			2019-04-17 12:00:00	23.1	0.9	13	60		23.5	0.9	28	60.7			2019-04-17 12:00:00	25.4	3.2	20	57		25.2	2.6	44.8	59.5			2019-04-17 12:00:00	25.9
2019-04-17 13:00:00	26.2	3	100	52		25.3	2.2	43.3	50.3			2019-04-17 13:00:00	26.3	1.5	350	53		25.3	1.7	343.1	51			2019-04-17 13:00:00	23.5	1.9	20	61		24.1	0.6	8.9	58.8			2019-04-17 13:00:00	25.9	2.8	10	55		26.2	2.5	346.7	56.6			2019-04-17 13:00:00	25.6
2019-04-17 14:00:00	26.8	4.1	100	49		25.7	4.2	72	44.3			2019-04-17 14:00:00	27	3	40	47		25.3	3.1	343.3	52.3			2019-04-17 14:00:00	22.8	0.7	345	63		24.6	2	8.1	55.6			2019-04-17 14:00:00	26.1	3.7	30	56		26.6	3.8	355.3	54			2019-04-17 14:00:00	25.5
2019-04-17 15:00:00	26.6	4.8	90	42		25.9	4.2	71.3	38.3			2019-04-17 15:00:00	26.7	2.7	60	47		25.6	2.4	0	51.8			2019-04-17 15:00:00	22.4	1	360	61		24.2	1	25.4	56.4			2019-04-17 15:00:00	25.6	2.7	10	58		26.3	2.9	14.5	54.6			2019-04-17 15:00:00	25.1
2019-04-17 16:00:00	25.7	4.6	80	45		25.2	4.1	73.5	46.7			2019-04-17 16:00:00	25.6	2.5	60	46		26.2	2.5	84.1	43.6			2019-04-17 16:00:00	22.4	1.5	10	59		23.9	0.9	28.4	55			2019-04-17 16:00:00	25.1	3.1	10	55		26	2.9	25.6	53.8			2019-04-17 16:00:00	25.2
2019-04-17 17:00:00	24.9	6.2	70	46		24.2	4.4	75.9	55.4			2019-04-17 17:00:00	24	4.4	70	47		25.2	3.5	81.3	48.1			2019-04-17 17:00:00	21.9	0.8	353	59		23.6	1.3	27.2	59.5			2019-04-17 17:00:00	24	2.5	360	58		25.2	2.7	43.7	52.7			2019-04-17 17:00:00	24.9
2019-04-17 18:00:00	22.5	4.4	90	65		23	3.7	76.7	64.3			2019-04-17 18:00:00	23	3.1	70	57		23.7	2.7	71.8	57.8			2019-04-17 18:00:00	21.6	1.6	32	57		22.6	1.1	48.2	64.3			2019-04-17 18:00:00	23	1.5	30	58		24.1	1.7	55.7	56.3			2019-04-17 18:00:00	24.5
2019-04-17 19:00:00	21.7	5	80	71		22	4	79.4	69.9			2019-04-17 19:00:00	22.2	2.3	60	65		22.6	2.2	60.7	68.5			2019-04-17 19:00:00	20.2	1.2	57	68		21.2	1.3	72.8	64.3			2019-04-17 19:00:00	22.2	1.1	20	61		23.1	1.3	46.2	60.2			2019-04-17 19:00:00	23.4
2019-04-17 20:00:00	21.5	5.1	80	73		21.6	1.7	78.5	70.3			2019-04-17 20:00:00	21.6	3	60	69		22	2.5	54.3	70.7			2019-04-17 20:00:00	19.4	1.1	88	77		20.1	1	63.7	75.7			2019-04-17 20:00:00	21.6	1.1	80	67		21.9	1.3	81.8	64.8			2019-04-17 20:00:00	22.8
2019-04-17 21:00:00	21.5	3.8	80	73		21.3	2.5	75.4	71.1			2019-04-17 21:00:00	21.5	2.5	70	69		21.8	1.9	45.1	70.2			2019-04-17 21:00:00	18.8	1	106	81		19.5	0.7	67	81.7			2019-04-17 21:00:00	21.2	1.8	90	69		21.2	1.8	65.5	69.4			2019-04-17 21:00:00	22.1
2019-04-17 22:00:00	21.4	2.7	70	73		21.1	2.6	76.6	69.8			2019-04-17 22:00:00	21.4	2.8	50	70		21.3	2.4	38.9	74.2			2019-04-17 22:00:00	18.2	0.8	147	85		19.1	0.8	76.8	83.5			2019-04-17 22:00:00	20.7	1.5	100	72		20.2	1.5	75.7	75.5			2019-04-17 22:00:00	21.1
2019-04-17 23:00:00	21.3	3.3	70	74		21	2.6	71.9	74.1			2019-04-17 23:00:00	21.3	2	50	71		21.2	1.8	31.6	75.4			2019-04-17 23:00:00	17.8	0.7	201	87		18.8	0.5	107	86.9			2019-04-17 23:00:00	20.2	1.4	90	74		20.1	0.6	94.3	75.4			2019-04-17 23:00:00	21.1
2019-04-18	21.1	2.4	70	75		20.8	2.4	68.2	73.9			2019-04-18	21.1	2	50	73		21	1.5	11.4	75.2			2019-04-18	17.9	0.9	209	87		18.5	0.4	118	88.8			2019-04-18	19.8	0.8	90	77		20.1	0.5	107.7	75.8			2019-04-18	20.9
2019-04-18 01:00:00	20.6	1	80	80		20.4	1.3	70.5	78.5			2019-04-18 01:00:00	21.1	1.3	40	73		20.9	1.3	4	76			2019-04-18 01:00:00	18	1.2	212	86		18.6	0.2	154.8	86.9			2019-04-18 01:00:00	19.8	1.5	90	79		19.8	1.1	115.8	78.3			2019-04-18 01:00:00	20.8
2019-04-18 02:00:00	20	0.6	90	84		20.2	0.8	71.6	80.8			2019-04-18 02:00:00	19.5	0.6	210	83		20.7	0.6	14.2	78.8			2019-04-18 02:00:00	17.6	0.7	208	90		18.4	0.2	134.6	87.2			2019-04-18 02:00:00	20.1	0.8	70	80		20.1	0.3	266.3	78.7			2019-04-18 02:00:00	21
2019-04-18 03:00:00	20.6	0.3	200	82		20.2	0.5	69.8	81.2			2019-04-18 03:00:00	19.5	1.2	200	84		20.5	1	330.5	80.5			2019-04-18 03:00:00	19.1	1	212	88		19	0.5	154	83.7			2019-04-18 03:00:00	20.6	0.2	0	79		20	0.1	185.1	81.2			2019-04-18 03:00:00	20.6
2019-04-18 04:00:00	21.4	1.5	160	77		20.3	0.7	80.4	81			2019-04-18 04:00:00	19.5	1.1	200	84		20.3	1.1	315.7	83			2019-04-18 04:00:00	18.8	0	0	90		19.9	0.4	217.7	76.4			2019-04-18 04:00:00	20.4	0.1	0	81		19.9	0.1	181.4	83.2			2019-04-18 04:00:00	21.1
2019-04-18 05:00:00	21.2	0.8	200	78		20.4	0.8	133.2	80.9			2019-04-18 05:00:00	19.9	0.8	220	83		20.2	0.9	292.4	83.3			2019-04-18 05:00:00	20.4	0	0	85		20.5	1.4	253.7	77.8			2019-04-18 05:00:00	20	0.2	0	83		20.5	0.3	188	82			2019-04-18 05:00:00	22.4
2019-04-18 06:00:00	20.6	0.9	210	84		20.2	0.8	149.4	84.1			2019-04-18 06:00:00	19.4	1.2	200	86		20.3	0.4	242.4	83.6			2019-04-18 06:00:00	20.2	1.4	216	92		20.2	2.8	244.1	86.5			2019-04-18 06:00:00	20.3	0.7	50	84		20.9	0.9	190.9	81.7			2019-04-18 06:00:00	22.4
2019-04-18 07:00:00	21.6	0.3	160	76		21.5	0.3	176.5	77			2019-04-18 07:00:00	20.7	0.8	250	83		21.3	0.4	83.8	80.2			2019-04-18 07:00:00	21.3	1.7	214	87		21.3	1.7	238.9	85.2			2019-04-18 07:00:00	21.7	0.5	70	80		21.7	0.6	188.5	81.1			2019-04-18 07:00:00	23
2019-04-18 08:00:00	24	0.2	0	68		23.8	0.2	250.4	67.1			2019-04-18 08:00:00	23.4	0.3	290	73		23.5	0.4	126.3	69.4			2019-04-18 08:00:00	22.7	1.6	225	80		22.6	1	232.9	77.5			2019-04-18 08:00:00	23.1	0	0	79		22.9	0.7	214.2	79.7			2019-04-18 08:00:00	-999.7
2019-04-18 09:00:00	26.3	1	330	63		25.5	0.9	272.5	66.1			2019-04-18 09:00:00	25.5	1.1	210	67		25.6	1	174.8	64.1			2019-04-18 09:00:00	23.7	1	234	74		24	1.3	241.8	72.5			2019-04-18 09:00:00	24.5	0.7	330	78		24.5	0.9	276.4	75.3			2019-04-18 09:00:00	24.2
2019-04-18 10:00:00	28.4	0.9	190	60		27.3	1	305.7	60.5			2019-04-18 10:00:00	27.3	1.6	230	61		27.4	1.6	218.6	59.5			2019-04-18 10:00:00	24.5	1.3	234	70		25.3	1.5	249.9	68.2			2019-04-18 10:00:00	25.1	1.9	280	73		25.7	1.9	270.1	69.4			2019-04-18 10:00:00	24.5
2019-04-18 11:00:00	29.2	1.9	310	58		28.9	1.9	290	53.9			2019-04-18 11:00:00	27.4	2.2	280	58		28.7	1.8	278.2	55			2019-04-18 11:00:00	25.5	0.4	246	67		26.4	1.2	325.4	59			2019-04-18 11:00:00	25.9	1.5	300	72		26.7	1.8	241.1	65.8			2019-04-18 11:00:00	26.2
2019-04-18 12:00:00	30.2	1.4	280	55		28.9	1.7	331	60.1			2019-04-18 12:00:00	28.8	1.1	280	59		29.7	1.3	300.2	48.4			2019-04-18 12:00:00	25.5	0.4	329	70		27.1	0.8	230.6	56.8			2019-04-18 12:00:00	27.3	2	300	70		27.2	2.3	265.3	65.6			2019-04-18 12:00:00	26
2019-04-18 13:00:00	28.7	0.9	190	62		28.4	1.2	351	63.8			2019-04-18 13:00:00	28.8	1.1	230	55		29.2	1.1	307.4	61.8			2019-04-18 13:00:00	25.1	0.3	339	73		27	0.5	277.4	60.3			2019-04-18 13:00:00	27.2	0.9	300	68		27.3	1.1	299.5	64.2			2019-04-18 13:00:00	26.5
2019-04-18 14:00:00	30.4	1.4	360	61		28.7	1.7	338.7	61.2			2019-04-18 14:00:00	28.2	1.9	20	63		28.7	1.9	335	62.9			2019-04-18 14:00:00	25.3	0.6	331	73		27.2	0.8	293.7	61.9			2019-04-18 14:00:00	27.8	2.5	300	63		27.6	2.5	305.1	60.2			2019-04-18 14:00:00	26.8
2019-04-18 15:00:00	29.4	2.5	320	58		26	2.8	62.9	76.3			2019-04-18 15:00:00	28.9	1.7	340	62		26	1.4	109.4	80.4			2019-04-18 15:00:00	26.5	0.5	270	63		27.2	0.9	302.2	58.6			2019-04-18 15:00:00	27.5	1.5	300	61		27.8	1.7	292.7	57.2			2019-04-18 15:00:00	27
2019-04-18 16:00:00	28.6	2.5	330	63		27.7	2.3	321.3	61.5			2019-04-18 16:00:00	28.7	1.4	10	60		27.5	1.4	260.5	69.9			2019-04-18 16:00:00	25.9	0.3	327	64		26.9	1.2	296.7	59.7			2019-04-18 16:00:00	26.8	1.1	290	59		27.9	1.2	277.6	54.4			2019-04-18 16:00:00	26.9
2019-04-18 17:00:00	27.7	1.6	320	56		25.9	1.4	53.8	69.8			2019-04-18 17:00:00	27.2	1.7	350	63		26.7	1.4	66.1	64.9			2019-04-18 17:00:00	24.9	0.6	329	66		26.6	0.6	295.2	61.7			2019-04-18 17:00:00	26.2	0.5	290	60		27.4	0.6	224.4	55.6			2019-04-18 17:00:00	25.9
2019-04-18 18:00:00	27.3	1.3	280	57		26.9	0.9	352.7	60.3			2019-04-18 18:00:00	26.6	0.4	300	60		26.9	0.6	290.9	60.3			2019-04-18 18:00:00	24.7	0.4	239	65		25.6	0.6	308.8	66			2019-04-18 18:00:00	25.7	0	0	60		26.7	0.7	212.8	57.6			2019-04-18 18:00:00	25.8
2019-04-18 19:00:00	26.9	0.7	250	59		25.7	0.7	133	72.3			2019-04-18 19:00:00	26	0.6	30	61		26.2	0.4	155.2	65			2019-04-18 19:00:00	22.7	0	0	79		24.3	0.8	81.9	75			2019-04-18 19:00:00	25.7	0.6	110	63		25.6	0.3	212.5	64.1			2019-04-18 19:00:00	25.1
2019-04-18 20:00:00	25.8	2.3	140	71		25.1	1.8	99.3	73			2019-04-18 20:00:00	24.1	0	0	67		25.6	0.7	60.9	67.9			2019-04-18 20:00:00	22.4	0	0	82		23.5	0.9	85.2	76.4			2019-04-18 20:00:00	24.3	1.3	90	73		25	1.5	85.3	71.1			2019-04-18 20:00:00	23.9
2019-04-18 21:00:00	25.4	2.1	100	73		24.6	0.6	111.3	77.8			2019-04-18 21:00:00	24.9	1.9	70	71		24.6	1.2	62.2	74.9			2019-04-18 21:00:00	22.4	0	0	81		22.9	0.6	83.1	75.8			2019-04-18 21:00:00	24.5	1.1	70	72		24.1	1.2	78.3	75.2			2019-04-18 21:00:00	24.3
2019-04-18 22:00:00	25.2	1.8	90	75		24.5	1.3	119.4	78			2019-04-18 22:00:00	24.2	0.3	20	73		24.3	0.4	62.6	78.1			2019-04-18 22:00:00	22.1	0	0	84		22.7	0.3	53.1	73.6			2019-04-18 22:00:00	24.1	0.6	70	73		24.3	0.4	89.9	72.5			2019-04-18 22:00:00	24.3
2019-04-18 23:00:00	25	0.5	110	77		24.5	0.7	86.6	79.7			2019-04-18 23:00:00	23.3	1.2	190	80		24.5	1.2	26.8	78.1			2019-04-18 23:00:00	21.9	0.3	137	86		22.4	0.2	79.4	75.4			2019-04-18 23:00:00	23.5	1.4	70	76		24	1.2	86.4	74.6			2019-04-18 23:00:00	24.5
2019-04-19	24.4	0.9	170	79		24.1	1	75	81.3			2019-04-19	22.7	0.7	210	83		24.1	0.8	58.5	80.2			2019-04-19	21.7	0	0	85		22.3	0	295.5	77.2			2019-04-19	23.2	1.8	70	78		23.7	0.8	122.8	76.1			2019-04-19	24.2
2019-04-19 01:00:00	23.8	0.6	180	81		23.8	0.6	97	81.9			2019-04-19 01:00:00	22.6	0.7	300	85		23.5	0.6	72	82.4			2019-04-19 01:00:00	21.6	0.8	214	86		22.2	1.1	193.3	79.5			2019-04-19 01:00:00	23.4	0.9	40	76		23.4	0.7	49.8	78.6			2019-04-19 01:00:00	24
2019-04-19 02:00:00	23.8	0.9	170	81		23.3	0.8	184.6	84.9			2019-04-19 02:00:00	22	1.1	190	86		23.3	0.9	261.5	83.2			2019-04-19 02:00:00	21.1	1	213	90		22.4	1	139.1	80.1			2019-04-19 02:00:00	23.2	0.9	90	77		23	1	93.2	80.9			2019-04-19 02:00:00	23.7
2019-04-19 03:00:00	23.5	0.8	210	81		23.1	0.6	163.3	84.6			2019-04-19 03:00:00	22.3	0.5	210	85		23.1	0.5	279.6	83.5			2019-04-19 03:00:00	21.7	0.4	228	88		22.4	1.4	182.2	76.4			2019-04-19 03:00:00	22.7	0.4	70	83		23	0.5	198.9	81.1			2019-04-19 03:00:00	23.4
2019-04-19 04:00:00	23.6	2.1	180	79		23	1.2	183	83.7			2019-04-19 04:00:00	22.1	0.9	240	86		23	0.9	237.8	83.2			2019-04-19 04:00:00	21.9	0.3	233	88		22.5	1.8	192	73.7			2019-04-19 04:00:00	22.5	0.5	80	84		22.9	0.3	121.4	83.1			2019-04-19 04:00:00	23
2019-04-19 05:00:00	23.1	0.8	210	88		22.8	0.6	159.6	86.4			2019-04-19 05:00:00	21.7	1.1	200	88		22.8	0.9	270.1	86.1			2019-04-19 05:00:00	20.8	1	209	97		22.1	1.6	162.7	74.6			2019-04-19 05:00:00	22.3	0.3	120	85		22.4	0.4	92.4	85.8			2019-04-19 05:00:00	22.5
2019-04-19 06:00:00	22.1	2.5	170	95		22.6	1.7	168.8	88.4			2019-04-19 06:00:00	21.6	0.8	90	91		22.6	0.8	193.7	88.3			2019-04-19 06:00:00	20.3	1.8	170	96		22	0.8	151.5	76.1			2019-04-19 06:00:00	21.7	3.5	140	85		22.3	2.2	106.3	84			2019-04-19 06:00:00	22
2019-04-19 07:00:00	22.6	2.5	50	96		22.9	1.8	113.3	89.2			2019-04-19 07:00:00	22.5	2.7	60	86		22.7	0.4	179.2	89.4			2019-04-19 07:00:00	20.3	0.3	323	95		22.7	1.3	166.8	77.3			2019-04-19 07:00:00	22.9	0.4	10	81		22.7	0.5	98.4	83.6			2019-04-19 07:00:00	23.3
2019-04-19 08:00:00	24.3	1.5	100	86		23.8	0.5	128.1	84.6			2019-04-19 08:00:00	23.1	0.5	40	89		23.1	0.4	262.4	89.7			2019-04-19 08:00:00	21.8	0.5	321	91		22.3	1	191.7	85.8			2019-04-19 08:00:00	23.9	1	300	81		23.4	1.2	166.1	84.6			2019-04-19 08:00:00	23.8
2019-04-19 09:00:00	25.6	2	250	73		25.3	1.6	267.9	76.2			2019-04-19 09:00:00	24.4	2.7	220	83		25.6	1.7	217.1	71.5			2019-04-19 09:00:00	22.1	1	219	89		23.9	1.7	213.2	80.2			2019-04-19 09:00:00	24.3	0.8	70	82		24.4	0.7	220.7	83.6			2019-04-19 09:00:00	23.2
2019-04-19 10:00:00	26.1	1.4	220	71		26.4	1	339.4	71.3			2019-04-19 10:00:00	25.4	1.3	200	78		26.5	0.9	215.4	70.7			2019-04-19 10:00:00	23.4	0.8	95	82		24.8	1.1	200.6	72.7			2019-04-19 10:00:00	24.7	1.7	40	79		25.4	1.7	251.3	77.9			2019-04-19 10:00:00	24.6
2019-04-19 11:00:00	27.1	0.2	0	61		27.8	0.4	303.6	61.3			2019-04-19 11:00:00	26.5	1.3	250	72		27.3	0.9	200.7	64.5			2019-04-19 11:00:00	24.5	0.8	5	78		25.4	1.4	258.1	76.5			2019-04-19 11:00:00	27	2.2	360	71		25.6	2.1	255.6	77.3			2019-04-19 11:00:00	25.2
2019-04-19 12:00:00	29.6	1.5	310	49		28.6	1.5	334.1	60.1			2019-04-19 12:00:00	29	1.6	20	64		28.4	1.4	211.3	62.7			2019-04-19 12:00:00	24.8	0.5	334	78		26.8	1.4	240.2	68.2			2019-04-19 12:00:00	25.9	1.1	300	74		27	1	187	70.8			2019-04-19 12:00:00	24.5
2019-04-19 13:00:00	28.5	1.6	300	59		29.5	1.9	305.9	58.5			2019-04-19 13:00:00	28.7	1.4	30	66		29.2	1.6	280.9	57.9			2019-04-19 13:00:00	24.7	0	0	78		26.4	1.5	295	66.9			2019-04-19 13:00:00	25.7	0.7	320	77		26.8	0.7	313	71.7			2019-04-19 13:00:00	25.1
2019-04-19 14:00:00	27.5	0.5	350	68		27.8	0.8	333.1	69.8			2019-04-19 14:00:00	27.1	1.4	10	68		28	1.2	342.4	69.8			2019-04-19 14:00:00	23.9	0.9	10	84		25.7	0.6	234.6	70.1			2019-04-19 14:00:00	24.9	0.6	340	81		26.2	0.7	271.4	71.3			2019-04-19 14:00:00	25.6
2019-04-19 15:00:00	26.5	2.2	310	75		25.9	1.9	85.6	70.1			2019-04-19 15:00:00	26	1.8	20	73		27.2	1.9	318.5	73			2019-04-19 15:00:00	22.5	0.6	359	94		24.7	1.2	78.1	74.3			2019-04-19 15:00:00	24.5	2.1	360	83		26.5	2.2	126.1	71.7			2019-04-19 15:00:00	24.3
2019-04-19 16:00:00	25.2	0.8	330	87		25.6	1.2	97.8	81.5			2019-04-19 16:00:00	24.6	0.9	20	80		25.6	0.7	105.3	80.3			2019-04-19 16:00:00	21.8	0.5	359	94		23.9	0.2	85.8	78			2019-04-19 16:00:00	23.5	1.2	340	85		25.6	1.2	43.2	75.4			2019-04-19 16:00:00	23.5
2019-04-19 17:00:00	24.5	0.8	350	96		25.5	0.4	291.3	82.3			2019-04-19 17:00:00	23.8	0.5	40	87		25.4	0.5	26.8	84.1			2019-04-19 17:00:00	21.3	0.4	55	96		23.2	0.8	71.2	81.6			2019-04-19 17:00:00	23.2	0.7	70	85		24.7	0.7	248.4	78.8			2019-04-19 17:00:00	22.5
2019-04-19 18:00:00	24.1	0.5	260	96		25.2	0.5	291.6	86			2019-04-19 18:00:00	23.2	0.2	0	90		25	0.3	285.7	85.8			2019-04-19 18:00:00	21.2	0.6	84	98		22.6	0.3	265.3	83			2019-04-19 18:00:00	22.6	2.3	90	87		24.2	0.9	210	80.7			2019-04-19 18:00:00	22.8
2019-04-19 19:00:00	23.8	0.5	140	98		23.9	0.7	287.7	94.2			2019-04-19 19:00:00	23	0.6	20	91		23.7	0.8	224.1	93			2019-04-19 19:00:00	21.2	0.8	86	98		22.4	0.7	127.8	83.1			2019-04-19 19:00:00	22.7	1.5	100	87		23.2	1.3	70.3	84.9			2019-04-19 19:00:00	22.9
2019-04-19 20:00:00	24	1.3	240	98		23.9	1	252.2	96.6			2019-04-19 20:00:00	23.1	0.9	250	94		23.4	0.8	258.1	94			2019-04-19 20:00:00	21.2	0.4	213	98		21.7	0.6	153.8	90.1			2019-04-19 20:00:00	22.8	0.4	240	88		23.1	0.5	103.9	87.4			2019-04-19 20:00:00	22.8
2019-04-19 21:00:00	23.9	1.2	240	98		23.7	1.3	119.5	93			2019-04-19 21:00:00	23.3	0.4	200	92		23.6	0.5	219.4	90.1			2019-04-19 21:00:00	21.2	0	0	98		21.5	0.5	72.4	92.5			2019-04-19 21:00:00	22.8	0.2	0	88		22.9	0.3	74.3	88.8			2019-04-19 21:00:00	22.7
2019-04-19 22:00:00	24	1.3	250	98		23.7	1.1	82.5	90.5			2019-04-19 22:00:00	23.3	0.9	220	92		23.6	0.3	276	92.2			2019-04-19 22:00:00	21	0	0	97		21.5	0.7	68	92.6			2019-04-19 22:00:00	22.7	0.6	120	90		22.8	0.7	134.7	90.2			2019-04-19 22:00:00	22.7
2019-04-19 23:00:00	23.8	0.5	320	96		23.6	0.6	61.2	93.2			2019-04-19 23:00:00	22.9	0.9	210	92		23.5	0.6	25.9	94.6			2019-04-19 23:00:00	21.2	0	0	98		21.5	0.3	91.2	92.7			2019-04-19 23:00:00	22.8	0	0	90		22.6	0.7	89.5	90.1			2019-04-19 23:00:00	22.7
2019-04-20	23.8	1.3	250	97		23.4	1.1	214.4	94.1			2019-04-20	22.7	1.1	200	92		23.4	0.8	20	95.9			2019-04-20	21	0	0	98		21.3	2.3	65	98			2019-04-20	22.6	0	0	90		22	1.9	73.4	93.5			2019-04-20	22.5
2019-04-20 01:00:00	23.4	0.3	140	98		23.3	0.4	144	94			2019-04-20 01:00:00	22.6	0.3	230	91		23.3	0.3	125.7	94.3			2019-04-20 01:00:00	21.1	0.3	193	98		21.1	1.5	88.6	96.9			2019-04-20 01:00:00	22.4	0.6	70	90		22.5	0.7	33	89.7			2019-04-20 01:00:00	22.5
2019-04-20 02:00:00	23	0.7	160	97		23.2	0.7	76	96.8			2019-04-20 02:00:00	22.5	0.7	220	92		22.9	0.8	22.4	94			2019-04-20 02:00:00	20.9	0	0	98		21	1.8	347.7	95.9			2019-04-20 02:00:00	22.2	0.9	50	91		21.6	1.1	2.8	96.2			2019-04-20 02:00:00	23
2019-04-20 03:00:00	22.8	1.1	170	97		23.1	0.8	66.8	95.5			2019-04-20 03:00:00	22.6	0.5	250	92		22.9	0.5	73.2	93.9			2019-04-20 03:00:00	20.9	0.5	73	98		21.1	0.7	115.2	98.4			2019-04-20 03:00:00	22.1	0.5	90	91		22	0.6	95.9	92			2019-04-20 03:00:00	-999.7
2019-04-20 04:00:00	22.6	0.8	140	96		23	0.4	330.3	94.9			2019-04-20 04:00:00	22.4	0.3	270	93		22.6	0.4	201.3	94.9			2019-04-20 04:00:00	20.8	0.3	23	98		21.2	0.4	31.2	99.6			2019-04-20 04:00:00	22.1	1.1	90	90		21.6	1.3	132.1	94.6			2019-04-20 04:00:00	22.1
2019-04-20 05:00:00	22.5	0.8	230	97		22.2	1	222.6	96.5			2019-04-20 05:00:00	22.4	1	200	94		22.1	1.2	194.4	95.4			2019-04-20 05:00:00	20.8	0.2	0	98		20.5	0.6	111.2	98.5			2019-04-20 05:00:00	22.3	0.2	0	91		21.4	0.4	137.3	93.3			2019-04-20 05:00:00	22.2
2019-04-20 06:00:00	22.8	0.9	210	95		22.3	0.8	195.8	94.8			2019-04-20 06:00:00	22.1	0.9	190	93		22.2	0.9	229	92.3			2019-04-20 06:00:00	21	0.7	214	98		20.7	0.4	186.7	92.7			2019-04-20 06:00:00	22.3	0.3	100	91		21.6	0.4	153.2	95.9			2019-04-20 06:00:00	22.1
2019-04-20 07:00:00	23.3	1.2	230	94		23	0.9	267.3	91.7			2019-04-20 07:00:00	22.4	1	200	92		23.3	1.1	215.1	84.6			2019-04-20 07:00:00	21.4	0	0	98		21.8	1.3	208.5	87.7			2019-04-20 07:00:00	22.4	0.9	110	91		22.6	0.9	196	89.1			2019-04-20 07:00:00	22.3
2019-04-20 08:00:00	24.3	1	220	86		24.2	0.8	279.6	84.5			2019-04-20 08:00:00	23.5	1.2	200	90		24.5	1.1	232.9	78.7			2019-04-20 08:00:00	22.3	0.9	226	91		23.3	0.5	225.2	80.2			2019-04-20 08:00:00	23.5	0.1	0	87		24	0.4	221.7	84.1			2019-04-20 08:00:00	23.8
2019-04-20 09:00:00	25.2	0.8	260	79		25.5	0.9	276.2	78.1			2019-04-20 09:00:00	25.1	1.5	220	81		26.1	1.6	248	72.4			2019-04-20 09:00:00	22.9	1.3	225	89		24.1	1.8	244	82.8			2019-04-20 09:00:00	24.7	1.4	280	83		25.2	1.7	242.1	78.7			2019-04-20 09:00:00	25.8
2019-04-20 10:00:00	24.9	0.7	310	83		25.8	0.9	263	76.6			2019-04-20 10:00:00	25.3	1.3	220	79		26.5	1.4	282.4	72.7			2019-04-20 10:00:00	23.3	0	0	87		25.6	2.3	260.4	75.2			2019-04-20 10:00:00	25.5	1.6	320	82		26.3	1.9	255.1	75.6			2019-04-20 10:00:00	27.9
2019-04-20 11:00:00	26.4	1.1	360	72		27.4	1.2	289.9	67.8			2019-04-20 11:00:00	26.3	1.4	230	74		28	1.3	252.9	65.7			2019-04-20 11:00:00	24.7	0.3	328	82		26.4	1	270.1	72.5			2019-04-20 11:00:00	27	1.6	300	79		26.6	1.9	266.8	76.2			2019-04-20 11:00:00	27.4
2019-04-20 12:00:00	28	1.7	320	63		28.3	1.7	278.3	66.8			2019-04-20 12:00:00	28.2	1.7	260	68		28.8	1.7	284.2	62.9			2019-04-20 12:00:00	25.3	0.2	0	80		26.8	0.9	269.1	72.5			2019-04-20 12:00:00	27.2	1.7	280	74		26.7	1.9	262.9	73.2			2019-04-20 12:00:00	25.3
2019-04-20 13:00:00	28.1	1.3	330	61		28.9	1.5	286.5	64.8			2019-04-20 13:00:00	28.3	1.8	270	68		28.9	1.8	276.5	64.6			2019-04-20 13:00:00	25.7	0.4	267	79		26.2	1.3	283.9	74.8			2019-04-20 13:00:00	25.9	1.9	290	77		26.3	2.1	274.2	75.4			2019-04-20 13:00:00	26.4
2019-04-20 14:00:00	27.8	1.9	330	65		28.4	1.9	275.4	66.7			2019-04-20 14:00:00	27.4	1.3	300	71		28.5	1.5	273.9	65.9			2019-04-20 14:00:00	24.4	0	0	85		25.7	1.5	272.9	78.5			2019-04-20 14:00:00	26	1	310	76		26.4	1.2	264.7	75.7			2019-04-20 14:00:00	26.6
2019-04-20 15:00:00	26.9	1	340	69		27.4	1.1	321.5	73.6			2019-04-20 15:00:00	27.4	1.4	240	72		28.4	1.3	286.1	66.9			2019-04-20 15:00:00	24.8	0.5	233	82		25.5	0.6	269.6	78.6			2019-04-20 15:00:00	25.9	1.1	290	76		26.3	1.2	271.6	75.3			2019-04-20 15:00:00	25.3
2019-04-20 16:00:00	26.8	1.3	340	71		26.9	1.2	324.7	75			2019-04-20 16:00:00	27.2	0.9	340	71		27.7	1.1	285.4	67.9			2019-04-20 16:00:00	24.3	0.5	328	85		25.5	1	291.9	76.8			2019-04-20 16:00:00	25.3	0.9	320	77		25.9	1.1	253	76.7			2019-04-20 16:00:00	24.7
2019-04-20 17:00:00	25.7	2.5	80	77		26.4	1.4	188.4	76.9			2019-04-20 17:00:00	26.1	2.3	60	74		27.1	1.5	269.8	70.2			2019-04-20 17:00:00	23.4	1	25	91		25	0.7	249.1	78.2			2019-04-20 17:00:00	24.4	0	0	84		25.2	0.6	223	81.7			2019-04-20 17:00:00	24.4
2019-04-20 18:00:00	25	3.1	110	81		25.9	1.4	86.6	77.9			2019-04-20 18:00:00	25.4	2.2	60	76		26.4	1.2	305	72.6			2019-04-20 18:00:00	23	0.5	29	90		24	0.6	294.6	83			2019-04-20 18:00:00	24.7	0.3	340	83		25.4	0.4	207.7	80.3			2019-04-20 18:00:00	24.3
2019-04-20 19:00:00	24.6	3.3	90	83		25.3	1.9	89.1	78.8			2019-04-20 19:00:00	24.9	1.4	60	78		25.5	0.9	271.5	77.3			2019-04-20 19:00:00	22.7	0.8	27	91		23.2	1.2	311.7	86.8			2019-04-20 19:00:00	23.9	1.2	50	84		25	0.7	302.8	81.4			2019-04-20 19:00:00	24
2019-04-20 20:00:00	24.4	2.3	110	84		24.7	1.5	54.6	82.7			2019-04-20 20:00:00	24.6	1.7	70	78		25.1	0.9	88.7	79.5			2019-04-20 20:00:00	22.3	0	0	91		23	0.8	84.7	86.9			2019-04-20 20:00:00	23.7	0.1	0	85		24.4	0.1	32.7	82.7			2019-04-20 20:00:00	24.1
2019-04-20 21:00:00	24	1.8	50	89		24.5	0.6	45.3	83.8			2019-04-20 21:00:00	24.4	0.8	30	80		24.7	0.4	26	81.8			2019-04-20 21:00:00	22.1	0	0	94		22.8	0.8	103.1	88			2019-04-20 21:00:00	23.5	2	300	84		24.3	1.1	208.8	82			2019-04-20 21:00:00	23.3
2019-04-20 22:00:00	23.4	0.2	0	96		24	0.3	261.8	88.7			2019-04-20 22:00:00	23.3	0.2	0	89		24.2	0.3	293.6	86.3			2019-04-20 22:00:00	21.3	0	0	97		22.1	0.4	52.6	91			2019-04-20 22:00:00	22.9	0	0	87		23.8	0.1	286.1	84			2019-04-20 22:00:00	22.9
2019-04-20 23:00:00	23.1	0.3	999.9	98		23.5	0.1	312.9	93.5			2019-04-20 23:00:00	23.2	0	0	90		23.5	0.2	272.1	90.6			2019-04-20 23:00:00	21.1	0	0	98		21.7	0.3	153.9	93.7			2019-04-20 23:00:00	22.7	0.2	0	91		23.3	0.2	121.8	87.9			2019-04-20 23:00:00	22.9
2019-04-21	23	1	110	98		23.3	0.4	51.8	95.8			2019-04-21	23.1	0.5	70	92		23.4	0.6	238.3	91.9			2019-04-21	21.2	0	0	98		21.6	0.1	304.5	95.1			2019-04-21	22.8	0.2	0	90		23.1	0.2	79.6	89.8			2019-04-21	22.7
2019-04-21 01:00:00	23.2	0.7	210	98		23.1	0.5	151.8	96.2			2019-04-21 01:00:00	22.8	0	0	92		23.4	0.3	277.6	92.8			2019-04-21 01:00:00	21.2	0	0	98		21.8	0.2	267.6	94.5			2019-04-21 01:00:00	22.6	0.6	10	91		22.9	0.5	119.9	92.1			2019-04-21 01:00:00	22.6
2019-04-21 02:00:00	23.3	1.1	210	99		23	0.6	201.2	97.8			2019-04-21 02:00:00	22.8	0.2	0	93		23.1	0.3	302.1	95.3			2019-04-21 02:00:00	21.2	0	0	98		21.8	0.7	306.4	95.3			2019-04-21 02:00:00	22.6	0.5	320	92		22.9	0.4	207.8	92.3			2019-04-21 02:00:00	22.5
2019-04-21 03:00:00	23	0.5	280	100		23.1	0.5	200.9	94.4			2019-04-21 03:00:00	22.8	0.3	20	94		23.2	0.4	252.1	94.2			2019-04-21 03:00:00	21.2	0	0	99		21.7	0.2	291.7	95.6			2019-04-21 03:00:00	22.6	1.1	360	92		22.9	0.5	190.9	92.6			2019-04-21 03:00:00	-999.7
2019-04-21 04:00:00	23.1	1.8	270	100		23	0.7	220.4	97.1			2019-04-21 04:00:00	22.9	1	220	94		23.2	0.8	233.2	93.7			2019-04-21 04:00:00	20.7	2.7	212	99		21.4	0.5	191.5	97.4			2019-04-21 04:00:00	22.2	0.9	150	92		22.6	0.7	201.6	92.3			2019-04-21 04:00:00	22.9
2019-04-21 05:00:00	22.9	2	110	100		23	0.9	164.5	96.9			2019-04-21 05:00:00	22.3	1.4	60	94		23.1	0.7	276.1	94.1			2019-04-21 05:00:00	21	1.6	220	91		21.3	1.1	192	96			2019-04-21 05:00:00	21.8	0.7	170	92		22.3	0.5	259.8	91.4			2019-04-21 05:00:00	22.9
2019-04-21 06:00:00	23	0.5	330	100		22.8	0.4	279.8	97.7			2019-04-21 06:00:00	22.3	0	0	95		22.9	0.8	310	95.3			2019-04-21 06:00:00	20.5	0	0	97		21	0.9	100.1	99.3			2019-04-21 06:00:00	21.8	0.4	110	93		22.4	0.5	272.5	90.6			2019-04-21 06:00:00	24.1
2019-04-21 07:00:00	23.1	0.7	120	100		23	0.5	97.4	97.5			2019-04-21 07:00:00	22.7	0	0	95		23	0.1	317.4	95.9			2019-04-21 07:00:00	21.4	0	0	98		22.1	0.5	105.5	93.1			2019-04-21 07:00:00	22.4	0.7	110	95		23.1	0.5	207.5	89.6			2019-04-21 07:00:00	24.3
2019-04-21 08:00:00	24.1	0.9	140	94		24.2	0.7	153.6	89.8			2019-04-21 08:00:00	23.8	0	0	99		24.4	0.4	127.3	87.8			2019-04-21 08:00:00	23.6	0.6	203	89		23.5	0.2	206.2	86.6			2019-04-21 08:00:00	23.6	0.1	0	90		24.4	0.1	259	83.9			2019-04-21 08:00:00	25.1
2019-04-21 09:00:00	25.5	0.7	140	85		25.6	0.3	200.2	80			2019-04-21 09:00:00	25.4	1	220	79		26.1	0.8	165.3	78			2019-04-21 09:00:00	23.7	1.1	209	82		24.4	0.8	229.1	79.4			2019-04-21 09:00:00	25.1	0.3	190	83		24.9	0.4	235	84.6			2019-04-21 09:00:00	25.7
2019-04-21 10:00:00	26.5	0.9	50	77		27.3	0.7	224	71.4			2019-04-21 10:00:00	27.2	0.3	210	73		27.4	0.4	206.1	70.2			2019-04-21 10:00:00	25	0.3	242	79		25.3	1.8	227.1	77.2			2019-04-21 10:00:00	27.8	1.6	270	72		25.4	2	208.9	85.4			2019-04-21 10:00:00	27.3
2019-04-21 11:00:00	27.1	1.1	10	72		28.4	0.9	292.3	63.2			2019-04-21 11:00:00	27.3	0.4	230	73		28.2	0.5	233.4	64.7			2019-04-21 11:00:00	25.9	0.3	18	80		25.7	0.5	246.8	77.4			2019-04-21 11:00:00	28.7	2.6	290	68		24.5	2.9	214.6	84.6			2019-04-21 11:00:00	27.9
2019-04-21 12:00:00	28.3	1.1	30	64		28	1.2	279.9	67.7			2019-04-21 12:00:00	28.4	1.2	290	70		27.3	0.4	281	71.1			2019-04-21 12:00:00	27	0	0	74		24.4	0.6	245.9	83			2019-04-21 12:00:00	30.3	1.4	290	65		28.8	1.7	190.1	65.3			2019-04-21 12:00:00	28.6
2019-04-21 13:00:00	28.3	0.7	350	67		28.6	0.9	287.8	67.4			2019-04-21 13:00:00	28.7	1.4	280	70		28.2	1	288.5	73.1			2019-04-21 13:00:00	28.1	0.8	236	67		24.1	1.6	249.5	91.9			2019-04-21 13:00:00	28.5	2	290	67		27.9	1.7	239.4	69.7			2019-04-21 13:00:00	29.1
2019-04-21 14:00:00	27.8	0.3	320	69		28.6	0.5	274.3	68.5			2019-04-21 14:00:00	27.5	1.7	270	74		27.9	0.9	258.9	73.3			2019-04-21 14:00:00	25.2	0	0	85		26.2	2.4	280.2	77.4			2019-04-21 14:00:00	28	1.9	300	68		26.5	2.4	265.4	74.4			2019-04-21 14:00:00	28.9
2019-04-21 15:00:00	27.6	1	350	75		28.6	1.2	268.7	68.8			2019-04-21 15:00:00	27.1	1.4	240	80		27.9	1.3	267.2	73.7			2019-04-21 15:00:00	24	0	0	95		25	1.3	250.4	81.3			2019-04-21 15:00:00	26.2	2.7	280	77		26.7	3.1	216	82.9			2019-04-21 15:00:00	25
2019-04-21 16:00:00	27.8	1.4	240	75		28.2	1.4	259	70.1			2019-04-21 16:00:00	27	1.3	210	80		28	1.6	247.3	70.9			2019-04-21 16:00:00	24.2	1.3	224	93		26.2	2.2	218.1	68.6			2019-04-21 16:00:00	24.9	1.4	190	86		26.4	1.8	213.8	80.3			2019-04-21 16:00:00	23.5
2019-04-21 17:00:00	27.2	0.4	350	77		27.9	0.5	213.1	73.5			2019-04-21 17:00:00	26.4	0.2	0	83		27.8	0.3	281.1	72.6			2019-04-21 17:00:00	24.2	1.5	219	88		24.8	0.6	215.3	83.1			2019-04-21 17:00:00	26	0.5	180	76		25.9	0.7	233.5	79.4			2019-04-21 17:00:00	24.9
2019-04-21 18:00:00	26.7	1.6	20	82		27.4	0.8	182.6	75.3			2019-04-21 18:00:00	25.5	0.9	60	87		27.2	1	212	75.9			2019-04-21 18:00:00	24	0.6	117	88		24.8	0.3	182	81.4			2019-04-21 18:00:00	25.6	0.1	0	78		25.9	0.3	262.6	77.5			2019-04-21 18:00:00	25.7
2019-04-21 19:00:00	25.9	1.6	90	82		26.5	1.7	76.3	78.9			2019-04-21 19:00:00	26.1	1.6	70	81		26.4	1.2	71.4	78.5			2019-04-21 19:00:00	23.5	0	0	95		24.2	0.2	37.4	85.1			2019-04-21 19:00:00	25.2	0.2	0	79		25.2	0.3	255.7	83.3			2019-04-21 19:00:00	26.5
2019-04-21 20:00:00	25.2	1.7	70	83		25.6	1.8	71.3	80			2019-04-21 20:00:00	25.7	1.1	50	79		26.2	1.1	36.5	77.9			2019-04-21 20:00:00	23.5	0.7	216	94		23.9	0.7	75.6	86			2019-04-21 20:00:00	23.8	0.8	270	83		24.7	0.8	271.3	83.4			2019-04-21 20:00:00	24.3
2019-04-21 21:00:00	25.1	1.6	100	84		25.3	1.3	83.6	82.1			2019-04-21 21:00:00	24.6	0.5	90	85		25.5	0.6	51.7	81.8			2019-04-21 21:00:00	22.7	0	0	95		23.6	1	64.6	88.4			2019-04-21 21:00:00	23.8	0.1	0	87		24.4	0.1	344.2	84.1			2019-04-21 21:00:00	25.3
2019-04-21 22:00:00	25.5	1.3	130	81		25.2	1.2	65.4	81.2			2019-04-21 22:00:00	25.2	1.2	50	81		25.3	1.2	1.4	82.2			2019-04-21 22:00:00	22.7	0	0	97		23.3	1	49.8	92			2019-04-21 22:00:00	23.7	0	0	89		24.3	0.5	163.5	87			2019-04-21 22:00:00	24.9
2019-04-21 23:00:00	25.1	0.3	360	83		25	0.1	87.3	82.3			2019-04-21 23:00:00	24.9	1.1	40	83		25.1	0.8	316.1	83.7			2019-04-21 23:00:00	22.5	0	0	98		23	0.8	68.4	92.2			2019-04-21 23:00:00	23.5	1.1	120	90		23.7	1.3	86.8	87.6			2019-04-21 23:00:00	25.9
2019-04-22	24.9	1.1	130	87		24.7	0.9	144.2	84.6			2019-04-22	24.4	0.1	0	88		24.8	0.2	252.4	86			2019-04-22	22.3	0.2	0	98		22.6	1	75.1	96.7			2019-04-22	23.2	1	100	90		23.5	1	92.6	91.3			2019-04-22	25.8
2019-04-22 01:00:00	25	0.8	200	88		24.4	0.9	137.5	87.4			2019-04-22 01:00:00	24.2	0.7	10	89		24.5	0.6	318.9	88.4			2019-04-22 01:00:00	22.3	0	0	98		22.5	0.9	78.6	97.4			2019-04-22 01:00:00	23.4	0.3	80	89		23.2	0.4	92.2	92.3			2019-04-22 01:00:00	26
2019-04-22 02:00:00	24.4	1.3	160	91		24.2	0.8	117.5	90.3			2019-04-22 02:00:00	23.8	0.5	220	89		24.4	0.6	283.6	90.3			2019-04-22 02:00:00	21.7	1.2	209	98		22.2	0.6	101.8	98.8			2019-04-22 02:00:00	23.2	0.6	120	89		23.1	0.7	95.4	92.6			2019-04-22 02:00:00	25.4
2019-04-22 03:00:00	24.1	1.4	160	92		23.9	0.9	69.3	91.1			2019-04-22 03:00:00	23.4	1.1	210	91		23.9	1.2	292.9	90.9			2019-04-22 03:00:00	21.5	0.9	206	97		22.2	0.9	137.9	98			2019-04-22 03:00:00	22.7	1	120	89		22.9	1	96.8	91.5			2019-04-22 03:00:00	26.1
2019-04-22 04:00:00	23.7	1	160	93		23.7	0.5	48.7	91.8			2019-04-22 04:00:00	23	0.1	0	91		23.6	0.1	310.7	90.2			2019-04-22 04:00:00	21.1	0	0	97		21.5	0.3	111	100			2019-04-22 04:00:00	22.5	0.5	100	87		22.3	0.6	81.6	91.2			2019-04-22 04:00:00	25.6
2019-04-22 05:00:00	23.5	1.3	180	94		23.4	0.5	131.8	93.8			2019-04-22 05:00:00	22.6	0.2	0	92		23.4	0.3	283	91.5			2019-04-22 05:00:00	20.9	0.9	214	96		21.5	0.3	146.4	98.2			2019-04-22 05:00:00	22.3	0.9	100	88		22.2	1	89.2	90.1			2019-04-22 05:00:00	25.5
2019-04-22 06:00:00	23.6	0.5	140	93		23.3	0.6	149.6	93.1			2019-04-22 06:00:00	22.6	0.6	190	92		23.3	0.5	272.4	92			2019-04-22 06:00:00	20.9	1.5	216	95		21.9	0.4	140.8	90			2019-04-22 06:00:00	22.4	1.7	110	87		22.5	1.7	104.7	85.7			2019-04-22 06:00:00	25.9
2019-04-22 07:00:00	24.7	1.1	190	86		24.5	0.6	154.5	88.1			2019-04-22 07:00:00	23.8	0.5	330	93		24.3	0.4	23.1	87.2			2019-04-22 07:00:00	23	0.5	177	87		23.8	0.4	110	68.4			2019-04-22 07:00:00	24.2	1.3	100	83		23.9	1.2	97.2	81.3			2019-04-22 07:00:00	26.6
2019-04-22 08:00:00	26.9	0.4	180	65		26.6	0.4	92	74.1			2019-04-22 08:00:00	26	0.2	0	81		26.5	0.3	117.6	72.4			2019-04-22 08:00:00	25.8	0.9	143	75		25.4	0.2	262.3	65.9			2019-04-22 08:00:00	26.8	0.5	90	76		26.1	0.5	115.6	74.1			2019-04-22 08:00:00	28.1
2019-04-22 09:00:00	29	0.3	210	54		29	0.3	212.9	63.9			2019-04-22 09:00:00	28.6	0.2	0	69		28.7	0.3	189.9	63.6			2019-04-22 09:00:00	27.4	0.8	168	67		27.4	1.2	268.3	62.1			2019-04-22 09:00:00	28.9	1.3	180	68		28.4	1.4	243.8	67.4			2019-04-22 09:00:00	28.9
2019-04-22 10:00:00	31.3	0.3	210	48		30.6	0.4	276.1	58.3			2019-04-22 10:00:00	31	0.6	220	63		30.7	0.6	193.9	55.3			2019-04-22 10:00:00	28.5	1.4	231	65		28.6	1	248.5	60.2			2019-04-22 10:00:00	30	2	290	69		29	2.5	264.4	70.2			2019-04-22 10:00:00	29.4
2019-04-22 11:00:00	33.2	1.1	280	46		32.2	1.5	307.1	48.4			2019-04-22 11:00:00	32	2.4	220	55		32.1	1.8	253.7	48.9			2019-04-22 11:00:00	28.6	0.3	242	69		27.4	0.7	331	77.3			2019-04-22 11:00:00	29.8	2.9	290	67		29.2	3.3	264.2	65.6			2019-04-22 11:00:00	29.7
2019-04-22 12:00:00	32	2.3	360	52		28.8	2.5	334.3	73.8			2019-04-22 12:00:00	31.9	1.5	280	57		29.5	1.7	4.8	70.6			2019-04-22 12:00:00	29.1	1	256	67		28.4	0.8	247.2	75.5			2019-04-22 12:00:00	29.9	2.2	290	70		29.2	2.6	262.5	68.7			2019-04-22 12:00:00	29.5
2019-04-22 13:00:00	32	2.2	350	55		30.2	2.3	26.4	65.2			2019-04-22 13:00:00	32.2	2.5	250	59		30.9	2.2	28.4	68.3			2019-04-22 13:00:00	29.3	1	238	67		29.5	1.2	269.3	67.2			2019-04-22 13:00:00	29.9	2.5	290	71		29.3	2.8	262.8	68.1			2019-04-22 13:00:00	29.4
2019-04-22 14:00:00	29.8	3.2	10	68		25.9	3.1	86.5	90.1			2019-04-22 14:00:00	31.4	2.4	250	62		26.8	2.3	100.5	76.8			2019-04-22 14:00:00	28.8	0.8	245	72		29.1	1	290	70			2019-04-22 14:00:00	30	2.2	280	70		29.3	2.5	270.1	70.1			2019-04-22 14:00:00	29.5
2019-04-22 15:00:00	29.3	2.7	20	74		25.2	1.8	20.1	93.7			2019-04-22 15:00:00	30	1.1	180	68		26.4	1.1	43	84.4			2019-04-22 15:00:00	28.2	0.6	249	76		28.8	0.5	294.6	69.5			2019-04-22 15:00:00	28.8	2.2	290	74		29	2.4	272.2	71			2019-04-22 15:00:00	29.2
2019-04-22 16:00:00	27.9	2.9	40	78		26.6	2	35.6	80.7			2019-04-22 16:00:00	28.7	1.8	60	73		26.6	1.9	32.4	86.1			2019-04-22 16:00:00	26.6	0.3	310	83		28.1	1.1	301.1	71.7			2019-04-22 16:00:00	27.8	2.7	300	77		28.6	2.6	278.7	71.2			2019-04-22 16:00:00	28.7
2019-04-22 17:00:00	25.8	2.4	120	96		25.8	2.3	32.4	86.5			2019-04-22 17:00:00	27	2.4	70	79		26.2	2.6	44.7	85.4			2019-04-22 17:00:00	26.1	0.3	232	83		27.3	0.8	296.9	76.5			2019-04-22 17:00:00	27.3	1.8	290	80		28.3	2	246.1	73.7			2019-04-22 17:00:00	27.8
2019-04-22 18:00:00	26	0.9	120	97		26.5	0.9	7.9	91.6			2019-04-22 18:00:00	26	0.9	270	86		25.8	1	26	92.6			2019-04-22 18:00:00	25.8	0.5	236	86		26.5	0.9	293.6	82			2019-04-22 18:00:00	27.1	1.4	280	81		27.6	1.7	258.3	76.9			2019-04-22 18:00:00	27.3
2019-04-22 19:00:00	25.8	1.1	200	98		26.5	0.7	38.8	90.7			2019-04-22 19:00:00	25.7	0.8	320	89		26.2	0.5	237.1	91.3			2019-04-22 19:00:00	25.5	0.6	236	86		25.9	1	293.5	85.4			2019-04-22 19:00:00	27	1.1	290	81		27.2	1.3	235.4	80.6			2019-04-22 19:00:00	27
2019-04-22 20:00:00	25.8	1.3	220	96		26.3	1.2	172.6	91.3			2019-04-22 20:00:00	25.6	0.6	270	91		25.9	0.7	286	93.1			2019-04-22 20:00:00	25.3	0.6	224	87		25.7	1.1	304.9	87.2			2019-04-22 20:00:00	27	0.9	240	81		27.1	1.1	250.5	80.5			2019-04-22 20:00:00	27.2
2019-04-22 21:00:00	25.7	0.1	0	99		26.1	0.2	146.2	89.9			2019-04-22 21:00:00	25.4	0	0	94		26.1	0.2	225.6	94.6			2019-04-22 21:00:00	25.2	0	0	89		25.4	0.4	247.5	89.8			2019-04-22 21:00:00	27.1	0.8	280	79		26.6	1	249.9	83.3			2019-04-22 21:00:00	27.1
2019-04-22 22:00:00	25.7	1	190	99		25.9	0.7	219.9	96.1			2019-04-22 22:00:00	25.4	0.4	220	92		26	0.4	299.5	94			2019-04-22 22:00:00	25.1	1	213	89		25.3	1.2	275.3	90.3			2019-04-22 22:00:00	27	0.8	270	79		26.7	1	259.6	81			2019-04-22 22:00:00	27.5
2019-04-22 23:00:00	25.7	1.3	110	99		25.8	1.1	170.9	97.1			2019-04-22 23:00:00	25.3	0	0	94		25.8	0.9	220.9	95.5			2019-04-22 23:00:00	25.4	2.1	225	83		24.8	1.2	267.5	89.5			2019-04-22 23:00:00	27	1.6	240	77		26.8	1.7	270	81.8			2019-04-22 23:00:00	26.9
2019-04-23	25.5	1.6	120	99		25.6	1.5	168.1	90.4			2019-04-23	25.3	1.5	100	93		26.1	1.3	209.6	90.2			2019-04-23	25.1	3.2	212	79		25.5	0.8	168.6	84.5			2019-04-23	26.5	2.6	170	74		26.6	2.3	218.6	78.3			2019-04-23	27.1
2019-04-23 01:00:00	25.7	2.2	70	96		25.7	2	143.3	90.5			2019-04-23 01:00:00	25.4	1.3	60	89		26	0.4	290.3	90.2			2019-04-23 01:00:00	24.3	0	0	88		25.1	1.1	142.9	84.8			2019-04-23 01:00:00	26.5	0.9	360	74		26.8	1	329.3	75.9			2019-04-23 01:00:00	29.1
2019-04-23 02:00:00	25.1	2.3	60	98		25.5	0.6	254.4	94.2			2019-04-23 02:00:00	25.1	0.3	280	90		25.7	0.4	331.8	91.7			2019-04-23 02:00:00	23.6	0	0	93		24.3	0.7	76	90.4			2019-04-23 02:00:00	26.1	0.7	340	78		26.3	0.7	279.8	82.7			2019-04-23 02:00:00	26.7
2019-04-23 03:00:00	25.2	1	230	96		25.1	0.8	225.3	94.8			2019-04-23 03:00:00	24.8	1.2	220	91		25.3	1.2	276.2	95			2019-04-23 03:00:00	24.1	0	0	90		24	0.3	63	91.5			2019-04-23 03:00:00	25.9	0.4	330	83		25.3	0.5	41.4	86.5			2019-04-23 03:00:00	25.7
2019-04-23 04:00:00	25	1.5	230	96		24.9	0.5	207.2	95.6			2019-04-23 04:00:00	24.7	1.3	200	90		25.1	1	202.5	91.3			2019-04-23 04:00:00	23.8	0	0	92		23.8	0.4	325.1	91.8			2019-04-23 04:00:00	25.6	0.9	30	84		25.3	0.8	82.5	87.7			2019-04-23 04:00:00	25.7
2019-04-23 05:00:00	24.8	0.3	240	98		24.9	0.3	183.7	96.1			2019-04-23 05:00:00	24.7	1.1	200	90		25.2	0.8	202.3	91.3			2019-04-23 05:00:00	23.7	0	0	93		23.7	0.3	105.6	91.5			2019-04-23 05:00:00	25.6	0.3	20	82		24.9	0.3	99.3	86.2			2019-04-23 05:00:00	24.9
2019-04-23 06:00:00	24.9	0.9	190	96		24.9	0.3	187.9	96			2019-04-23 06:00:00	24.8	0	0	91		25.3	0.3	214.4	89.6			2019-04-23 06:00:00	23.7	0	0	95		23.7	0.6	164.1	91			2019-04-23 06:00:00	25.5	0.5	170	80		25.1	0.3	172	84.1			2019-04-23 06:00:00	25.7
2019-04-23 07:00:00	25.6	1.6	180	90		25.1	1.1	173.4	91.7			2019-04-23 07:00:00	25.4	1.3	210	88		25.6	0.7	213.2	87.1			2019-04-23 07:00:00	24.2	0.8	201	88		24.1	0.3	180.7	89.3			2019-04-23 07:00:00	26.3	0.2	0	79		26.1	0.3	210.2	80.5			2019-04-23 07:00:00	26.4
2019-04-23 08:00:00	26.8	1.1	170	81		26.3	0.6	314.7	85.6			2019-04-23 08:00:00	27.3	1.2	240	81		26.8	0.9	201.3	80.1			2019-04-23 08:00:00	25.9	1	229	77		25.2	1.1	228.7	84.3			2019-04-23 08:00:00	28.4	1.1	260	72		27.3	1.4	216.8	76.6			2019-04-23 08:00:00	27.9
2019-04-23 09:00:00	29	1.6	240	62		28.4	1.3	212.4	71.2			2019-04-23 09:00:00	29.3	2.5	230	66		28.8	2	224.5	69.3			2019-04-23 09:00:00	26.6	1.7	227	76		26.6	1.2	211.7	80.3			2019-04-23 09:00:00	30	1.1	230	65		28.5	1.4	256.9	71.1			2019-04-23 09:00:00	29
2019-04-23 10:00:00	30.1	0.8	240	59		30.2	1.1	271.1	63.1			2019-04-23 10:00:00	30.8	2.8	230	62		30.4	2.3	218.7	60.6			2019-04-23 10:00:00	27.9	1.1	233	67		28.5	0.9	211.9	72			2019-04-23 10:00:00	31.3	1.3	220	61		29.3	1.7	256.1	68.5			2019-04-23 10:00:00	29.7
2019-04-23 11:00:00	31.7	1.8	270	53		32	2.2	231.3	53.9			2019-04-23 11:00:00	31.7	2.4	240	60		31.5	1.8	194.5	58			2019-04-23 11:00:00	29.2	1.1	238	64		30	1.3	265	64.3			2019-04-23 11:00:00	31	2.6	280	62		29.8	3.2	259.4	64.4			2019-04-23 11:00:00	30.4
2019-04-23 12:00:00	32.7	2.7	240	43		31.8	2	338.2	61.3			2019-04-23 12:00:00	32.7	2.3	240	55		32.9	1.6	191	52.8			2019-04-23 12:00:00	30	1.4	224	63		30.5	1.7	266.5	62.6			2019-04-23 12:00:00	31.6	2	290	62		30.4	2.5	258.7	64.4			2019-04-23 12:00:00	31.8
2019-04-23 13:00:00	33.7	0.9	240	49		32.8	1	352.1	56.4			2019-04-23 13:00:00	33	2.3	230	54		33.6	2.2	249.5	49.5			2019-04-23 13:00:00	31.4	1	239	59		31	1.9	267.2	57.8			2019-04-23 13:00:00	31.7	2.2	290	66		30.8	2.8	261.3	63.4			2019-04-23 13:00:00	32.2
2019-04-23 14:00:00	32.4	2.2	350	58		33.5	2.5	301.8	50.5			2019-04-23 14:00:00	33.1	2.3	280	58		33.4	2.3	299.9	48.3			2019-04-23 14:00:00	30.8	0.6	261	64		31.1	1.6	269.3	50.3			2019-04-23 14:00:00	30.9	3.9	280	64		31	4.3	258.8	59.1			2019-04-23 14:00:00	31.8
2019-04-23 15:00:00	32.5	2.2	360	56		32.5	2.5	325.4	59.9			2019-04-23 15:00:00	32.6	2	280	60		33.2	2.4	291.1	47.7			2019-04-23 15:00:00	30.5	1.6	235	55		30.5	2.6	265.7	55.9			2019-04-23 15:00:00	30.3	4.2	270	62		30.5	4.6	258.7	61			2019-04-23 15:00:00	30.9
2019-04-23 16:00:00	32.5	1.3	340	55		30.8	1.7	55.7	68.5			2019-04-23 16:00:00	32.6	2.3	290	51		32.8	2.4	283.7	50.9			2019-04-23 16:00:00	29.7	1.2	235	61		29.7	2.3	252.5	59			2019-04-23 16:00:00	29.3	4.2	270	65		29.7	4.4	247.2	65.3			2019-04-23 16:00:00	29.6
2019-04-23 17:00:00	30.5	1.9	10	66		30.3	2.4	77	67.7			2019-04-23 17:00:00	31.5	2.3	230	52		32.2	1.7	243.2	55			2019-04-23 17:00:00	27.9	1.7	228	69		28.3	2.1	252	62.9			2019-04-23 17:00:00	28.8	1.4	250	67		28.5	1.8	243.8	71.8			2019-04-23 17:00:00	28.8
2019-04-23 18:00:00	29.5	0.3	180	71		29.7	0.5	104.3	69.5			2019-04-23 18:00:00	29.8	1.8	230	61		30.7	0.9	241	63.2			2019-04-23 18:00:00	26.6	0.8	233	74		27.4	0.4	232.1	70.7			2019-04-23 18:00:00	27.5	1.1	280	75		27.5	1.3	246.1	76.3			2019-04-23 18:00:00	27.7
2019-04-23 19:00:00	29.6	0.4	220	67		29.6	0.4	96.1	65.3			2019-04-23 19:00:00	28.8	1.8	240	66		29.8	1.7	267.6	62.1			2019-04-23 19:00:00	25.7	1.2	226	82		27.2	1.6	223.7	71.6			2019-04-23 19:00:00	27	0.6	999.9	76		27.2	0.8	263.9	76.9			2019-04-23 19:00:00	27.2
2019-04-23 20:00:00	28.9	0.4	200	71		28.5	0.4	356.1	70.4			2019-04-23 20:00:00	27.9	1.3	240	70		28.9	1.3	293.4	63.8			2019-04-23 20:00:00	25.5	0.9	219	83		26	0.7	277.6	77.8			2019-04-23 20:00:00	26.8	0.4	999.9	76		26.9	0.5	261.2	78.3			2019-04-23 20:00:00	27.2
2019-04-23 21:00:00	28.6	1.5	240	74		27.9	1.1	327.8	74.6			2019-04-23 21:00:00	27.4	1.4	230	75		28.2	1.5	273.2	69			2019-04-23 21:00:00	25.3	0.9	226	84		25.6	0.5	217.2	81.1			2019-04-23 21:00:00	26.8	0.4	250	76		26.7	0.5	238.4	79.2			2019-04-23 21:00:00	27.2
2019-04-23 22:00:00	28.1	0.9	220	77		27.5	0.5	140.8	78.6			2019-04-23 22:00:00	26.9	1	200	78		27.6	1.3	231.5	73.9			2019-04-23 22:00:00	24.3	0.4	66	90		25.1	0.8	236.4	82.8			2019-04-23 22:00:00	27	0.5	160	74		27	0.5	290.4	75.7			2019-04-23 22:00:00	27.2
2019-04-23 23:00:00	27.7	1	210	80		27.2	0.8	320.1	81.6			2019-04-23 23:00:00	26.7	0.8	200	79		27.1	1	258.6	77			2019-04-23 23:00:00	25	1.4	212	84		25	0.5	224.6	82.9			2019-04-23 23:00:00	27.2	1.2	170	70		26.8	0.9	348	75.4			2019-04-23 23:00:00	27.4
2019-04-24	27.2	0.9	160	82		27	1	169.1	83.7			2019-04-24	26.4	0.6	230	82		26.7	0.8	193.4	81.7			2019-04-24	24.2	0.7	188	87		24.8	1	153.2	80			2019-04-24	27.1	1.6	170	70		26.3	1.2	89.3	74.9			2019-04-24	27.3
2019-04-24 01:00:00	26.8	1.1	150	86		26.4	1.2	117.3	86.9			2019-04-24 01:00:00	26.2	0.8	120	83		26.6	0.6	244.6	82.6			2019-04-24 01:00:00	23.5	0.3	128	93		24.4	0.6	173.5	82			2019-04-24 01:00:00	26	0.5	140	77		26.2	0.6	100.1	76.9			2019-04-24 01:00:00	27.7
2019-04-24 02:00:00	26.2	1.4	200	88		26.2	0.8	110.7	85.9			2019-04-24 02:00:00	25.7	0.6	210	85		26.2	0.9	268.1	86.5			2019-04-24 02:00:00	23.2	0.6	176	95		24.4	1.2	145.1	82.4			2019-04-24 02:00:00	25.4	1.3	100	81		25.1	1.4	72.3	83.1			2019-04-24 02:00:00	27.5
2019-04-24 03:00:00	26	0.9	200	89		25.9	0.9	166.2	86.3			2019-04-24 03:00:00	25.1	0.5	200	87		26	0.6	202.1	85.6			2019-04-24 03:00:00	23.4	0	0	95		24.1	0.8	170.7	82.5			2019-04-24 03:00:00	25.1	0.5	100	81		24.8	0.6	74.3	84.3			2019-04-24 03:00:00	27
2019-04-24 04:00:00	25.8	0.9	200	91		25.5	0.9	125.5	87.9			2019-04-24 04:00:00	24.6	1.4	200	88		25.6	0.9	256.9	88.2			2019-04-24 04:00:00	23.1	1.1	208	95		23.8	0.6	145.1	84			2019-04-24 04:00:00	24.9	0.7	140	82		24.4	0.8	74.6	85.6			2019-04-24 04:00:00	26.4
2019-04-24 05:00:00	25.5	0.9	210	90		25.3	0.8	177.6	88.3			2019-04-24 05:00:00	24.3	0.2	0	89		25.3	0.3	308.3	88.8			2019-04-24 05:00:00	23.8	1.1	228	88		23.5	0.4	193.3	84.5			2019-04-24 05:00:00	24.3	0.3	110	84		24.3	0.4	85.6	83.4			2019-04-24 05:00:00	25.2
2019-04-24 06:00:00	25.7	1.1	220	90		25.3	0.9	215	88			2019-04-24 06:00:00	24.7	1.2	220	88		25.4	0.9	291.9	89.9			2019-04-24 06:00:00	22.8	0.6	206	94		23.5	0.4	188.2	85.5			2019-04-24 06:00:00	24.4	0.2	0	84		24.5	0.2	120.7	81			2019-04-24 06:00:00	25.6
2019-04-24 07:00:00	26.3	0.5	200	84		26	0.4	218.6	84.7			2019-04-24 07:00:00	25.3	0.9	200	87		26.4	0.8	189.1	84.2			2019-04-24 07:00:00	24.7	0.5	188	85		25.1	0.9	211.5	80.1			2019-04-24 07:00:00	26.8	0.6	180	73		26.2	0.7	199.9	73.6			2019-04-24 07:00:00	26.6
2019-04-24 08:00:00	27.6	0.7	120	74		28.3	0.4	245	73			2019-04-24 08:00:00	27.5	0.3	170	76		28.3	0.5	215.2	70.3			2019-04-24 08:00:00	26.4	1.9	224	74		26.1	1.2	235.7	73.9			2019-04-24 08:00:00	28.4	0.8	270	70		27.5	1	221.2	65.9			2019-04-24 08:00:00	27.7
2019-04-24 09:00:00	29.8	1.3	270	59		29.3	1.5	242.9	63.9			2019-04-24 09:00:00	29.7	2	210	65		29.2	1.7	207.1	64.2			2019-04-24 09:00:00	27	2.5	226	72		27.1	1.5	232.4	66.2			2019-04-24 09:00:00	29.5	1	999.9	68		28.2	1.3	249.8	67.2			2019-04-24 09:00:00	28.3
2019-04-24 10:00:00	31.8	0.8	270	55		30.5	0.8	302.7	56.4			2019-04-24 10:00:00	30.3	1.9	230	63		30.7	1.7	223.6	54.7			2019-04-24 10:00:00	28.4	1.8	232	68		28.4	2.4	224.2	62.6			2019-04-24 10:00:00	28.8	2.7	290	72		28.9	3.3	249.7	66.4			2019-04-24 10:00:00	28.8
2019-04-24 11:00:00	32.1	1.2	250	50		31.9	0.8	318.4	50.7			2019-04-24 11:00:00	30.4	2.1	260	61		32.1	2	239.7	48.9			2019-04-24 11:00:00	29.3	1.8	229	67		29.2	3.5	250.6	63.9			2019-04-24 11:00:00	29.7	2.6	270	70		29.2	3.3	249.7	62.3			2019-04-24 11:00:00	-999.7
2019-04-24 12:00:00	33.2	0.6	999.9	49		33.3	0.8	234.8	44.3			2019-04-24 12:00:00	31.3	1.8	240	61		33.4	1.6	201.5	41.2			2019-04-24 12:00:00	29.2	1.9	229	69		28.8	1.8	249.5	62.7			2019-04-24 12:00:00	29.7	3.1	280	70		29.4	3.7	245.2	64.4			2019-04-24 12:00:00	29.7
2019-04-24 13:00:00	33.9	1	210	44		34.1	0.7	308	41.5			2019-04-24 13:00:00	32.8	1.1	240	56		33.1	1.4	260.5	48.4			2019-04-24 13:00:00	29.3	1.9	230	72		29.2	1.6	251.8	64.3			2019-04-24 13:00:00	30.1	2.9	280	69		29.6	3.4	247.8	66.3			2019-04-24 13:00:00	30.1
2019-04-24 14:00:00	33.8	1.1	310	51		33	1.3	311.8	52.2			2019-04-24 14:00:00	33.3	1.2	240	56		33.3	1.4	260.2	48.9			2019-04-24 14:00:00	29.1	1	245	74		29	2.1	252.8	68.2			2019-04-24 14:00:00	30.3	3.1	280	69		29.4	3.8	248.2	68.1			2019-04-24 14:00:00	30.3
2019-04-24 15:00:00	33.3	1.9	330	58		32.3	2.2	1.9	55.5			2019-04-24 15:00:00	32.7	2.2	310	63		32.8	2.2	255.6	53.2			2019-04-24 15:00:00	29.2	0.6	250	73		28.4	1.8	251.1	68.7			2019-04-24 15:00:00	29.8	3.4	280	71		29.1	4	246.2	69.7			2019-04-24 15:00:00	30.2
2019-04-24 16:00:00	32.4	1.5	40	59		32.5	1.6	257.6	54.1			2019-04-24 16:00:00	31.2	2.5	250	65		31.7	2.2	250.9	56.1			2019-04-24 16:00:00	28.7	0.7	237	75		27.8	1.2	245.9	73.8			2019-04-24 16:00:00	29.7	1.5	999.9	73		28.5	1.9	245.6	72.9			2019-04-24 16:00:00	30.3
2019-04-24 17:00:00	31	2.7	350	68		31.7	2.6	254.2	56.6			2019-04-24 17:00:00	31.1	1.4	300	67		30.8	1.5	243.3	61.3			2019-04-24 17:00:00	28.1	0.6	331	79		27.1	0.8	238.7	77.3			2019-04-24 17:00:00	28.9	1.5	310	75		28.1	1.9	239.2	74.5			2019-04-24 17:00:00	29.7
2019-04-24 18:00:00	29.3	2.3	60	74		30.7	2.3	261.9	62.5			2019-04-24 18:00:00	29.8	2.2	50	69		29.9	1.8	247.4	65.9			2019-04-24 18:00:00	26.5	0.5	246	84		26.8	1.2	207.9	74.4			2019-04-24 18:00:00	27.4	2.5	280	79		27.4	3.1	241.5	72.9			2019-04-24 18:00:00	28.5
2019-04-24 19:00:00	28.3	3.2	80	79		29	2.2	68.2	72.6			2019-04-24 19:00:00	28.4	0.8	340	75		29.1	0.9	265.6	67.4			2019-04-24 19:00:00	25.7	1.3	228	86		25.8	1.9	253.1	76.3			2019-04-24 19:00:00	27.1	1.3	200	80		26.8	1.7	241	74.8			2019-04-24 19:00:00	26.9
2019-04-24 20:00:00	27.9	2.6	80	83		28.6	1.8	79.5	74.4			2019-04-24 20:00:00	27.9	2.2	60	77		28.5	1.6	271.5	67.9			2019-04-24 20:00:00	25.4	1.1	221	88		25.6	0.9	252.9	76.9			2019-04-24 20:00:00	27	0.3	170	80		26.7	0.4	245.9	75.6			2019-04-24 20:00:00	26.6
2019-04-24 21:00:00	27.6	3	70	84		28.5	1.6	344.9	71.8			2019-04-24 21:00:00	27.6	1.6	60	78		27.8	2	278.2	69.4			2019-04-24 21:00:00	25.5	0.7	222	88		25.5	1.2	256.2	77.9			2019-04-24 21:00:00	26.9	1.4	290	81		26.5	1.6	257.7	76			2019-04-24 21:00:00	26.8
2019-04-24 22:00:00	27.8	1.4	70	82		28.1	1.4	332	69.9			2019-04-24 22:00:00	27.9	1.7	60	78		27.6	2.1	282.8	71.1			2019-04-24 22:00:00	25.2	0.9	203	90		25	1	255.2	81.1			2019-04-24 22:00:00	26.6	0.5	999.9	81		26.2	0.7	251.4	76.3			2019-04-24 22:00:00	26.6
2019-04-24 23:00:00	27.9	0.6	100	81		27.3	0.7	43.1	76.6			2019-04-24 23:00:00	27.7	1.3	50	78		27.2	1.5	275.4	74.1			2019-04-24 23:00:00	25	0	0	90		24.7	0.4	247.5	82.8			2019-04-24 23:00:00	26.5	0.1	0	82		26.1	0.3	236.4	75.6			2019-04-24 23:00:00	26.7
2019-04-25	27.2	1.5	130	85		26.7	1.4	59.2	82.5			2019-04-25	27	1.3	10	80		27.1	1.4	280.3	74.2			2019-04-25	24.7	0	0	90		24.3	1.3	249.1	84.2			2019-04-25	26	0.3	290	82		25.9	0.4	228.9	74.3			2019-04-25	26.1
2019-04-25 01:00:00	27.2	0.8	130	86		26.5	0.8	71.3	83.5			2019-04-25 01:00:00	26.8	0.7	50	80		27	0.9	286.5	73.7			2019-04-25 01:00:00	23.7	0	0	94		24.5	1.3	245.1	81.5			2019-04-25 01:00:00	26	0.4	270	82		25.9	0.4	253.5	72.5			2019-04-25 01:00:00	25.3
2019-04-25 02:00:00	27.1	1.1	100	86		26.5	0.7	73.6	83.1			2019-04-25 02:00:00	26.5	1.2	20	82		26.7	1.5	256.2	76.1			2019-04-25 02:00:00	24.1	0	0	93		24.6	1.8	239	77.9			2019-04-25 02:00:00	25.7	0.4	170	84		25.4	0.5	217.5	75.4			2019-04-25 02:00:00	25.3
2019-04-25 03:00:00	26.8	0.2	0	85		26.4	0.2	50.7	82.9			2019-04-25 03:00:00	26	0.4	350	85		26.4	0.5	249.3	76.4			2019-04-25 03:00:00	24.4	0.4	229	89		24.2	0.9	234.3	78.6			2019-04-25 03:00:00	25.9	0.3	290	83		25	0.4	202.2	77.7			2019-04-25 03:00:00	24.3
2019-04-25 04:00:00	26.6	0.9	190	87		26.5	0.6	2.8	80.9			2019-04-25 04:00:00	25.7	1	200	86		26.3	1	278.9	75.1			2019-04-25 04:00:00	23.9	1.3	218	91		23.7	0.8	233.8	81.8			2019-04-25 04:00:00	25.1	0.3	170	83		24.7	0.3	186.5	80			2019-04-25 04:00:00	24.1
2019-04-25 05:00:00	26.6	0.2	0	86		26.5	0.3	293.7	79.1			2019-04-25 05:00:00	25.6	1	200	84		26	1.2	270.2	74.2			2019-04-25 05:00:00	23.6	0.9	226	91		23.5	1.9	249.7	83.3			2019-04-25 05:00:00	25.3	1.2	170	82		24.5	1.1	196.9	81.2			2019-04-25 05:00:00	24.9
2019-04-25 06:00:00	26	0.8	160	87		26.1	0.2	51.3	82			2019-04-25 06:00:00	24.7	1.1	200	84		26	1.2	239.7	74.4			2019-04-25 06:00:00	22.6	1.4	213	88		23.5	1.5	225.7	83.3			2019-04-25 06:00:00	24.7	0.5	160	82		24.3	0.7	215.8	80.4			2019-04-25 06:00:00	25.2
2019-04-25 07:00:00	26.5	0.9	230	79		26.8	0.6	335.2	77.2			2019-04-25 07:00:00	25.1	0.9	220	77		26.8	0.6	138.2	72.4			2019-04-25 07:00:00	24.4	0.6	175	80		24.6	0.5	223.5	79.3			2019-04-25 07:00:00	25.7	1.1	170	79		25.8	1.4	215.6	71.8			2019-04-25 07:00:00	26
2019-04-25 08:00:00	27.5	1	210	62		28	1.1	312.5	68			2019-04-25 08:00:00	27.5	1.4	190	70		27.7	1.3	31.6	67.6			2019-04-25 08:00:00	25.6	0.6	170	74		25.9	1	268.1	71.3			2019-04-25 08:00:00	28.1	0.8	200	67		27.6	1.1	224.1	64.1			2019-04-25 08:00:00	27.7
2019-04-25 09:00:00	29.7	0.4	260	54		29.1	0.5	311.6	60.2			2019-04-25 09:00:00	29.1	0.8	180	65		29.1	0.3	46.7	59.3			2019-04-25 09:00:00	26.3	2.1	223	70		27.1	1.6	248.5	65.1			2019-04-25 09:00:00	29.5	2	250	60		29.1	2.5	221.4	56.7			2019-04-25 09:00:00	29
2019-04-25 10:00:00	30.7	1.7	250	44		30.3	1.5	326.7	54.4			2019-04-25 10:00:00	30.7	2.1	240	53		30.5	1.6	22.7	50.7			2019-04-25 10:00:00	29.1	2.2	219	59		28.7	1.8	221.8	56.9			2019-04-25 10:00:00	30.5	2.5	270	58		30.2	3.2	231.1	54.2			2019-04-25 10:00:00	-999.7
2019-04-25 11:00:00	32.5	1.9	230	39		32	1.3	320.9	43.8			2019-04-25 11:00:00	31.8	2	220	51		32	1.1	318.4	45.9			2019-04-25 11:00:00	30.6	1.3	232	55		30.7	3.4	240.8	48.3			2019-04-25 11:00:00	30.4	3.9	270	65		30.3	4.8	245.3	56.9			2019-04-25 11:00:00	30.7
2019-04-25 12:00:00	33.2	1.1	210	41		33.2	1.2	321.3	40.6			2019-04-25 12:00:00	32.7	0.9	210	54		33.4	0.5	63	41.1			2019-04-25 12:00:00	30.6	1.7	234	59		32.2	3.1	233.1	41.2			2019-04-25 12:00:00	30.3	3.7	280	67		30.8	4.4	244.9	54.9			2019-04-25 12:00:00	31.8
2019-04-25 13:00:00	34.7	1.2	270	43		32.5	1.7	70	51.5			2019-04-25 13:00:00	34.5	2.2	250	47		34.5	2.5	254.9	38.9			2019-04-25 13:00:00	30.7	1.4	233	61		30.5	3.1	251	53.5			2019-04-25 13:00:00	29.6	7.3	280	67		30.4	7.7	243.1	56.3			2019-04-25 13:00:00	31.7
2019-04-25 14:00:00	34.7	1.9	290	41		31.4	2.5	62.8	55.2			2019-04-25 14:00:00	33.8	3.8	240	49		33.8	3.7	248.3	42.1			2019-04-25 14:00:00	30.4	3.1	225	61		29.7	4.3	250.9	57.4			2019-04-25 14:00:00	31	4.6	280	64		29.8	5.5	243	58.3			2019-04-25 14:00:00	-999.7
2019-04-25 15:00:00	35	2.2	260	36		30.9	2.8	70.3	56.9			2019-04-25 15:00:00	33.9	4.5	220	44		32.6	3.3	245.3	47.7			2019-04-25 15:00:00	31.2	3.1	229	53		29	3.9	249.4	59.2			2019-04-25 15:00:00	31.1	4.7	280	60		29.5	5.6	239.8	59.3			2019-04-25 15:00:00	31.6
2019-04-25 16:00:00	34	1.3	230	43		31.1	1.7	75	56.2			2019-04-25 16:00:00	34.1	3.2	240	44		31.8	2.9	251.2	49.1			2019-04-25 16:00:00	30	1.7	242	58		28.3	6.3	252.1	58.3			2019-04-25 16:00:00	30.3	5.1	280	57		29.2	6.1	240.9	58			2019-04-25 16:00:00	-999.7
2019-04-25 17:00:00	29.4	4	70	66		31.2	2.3	284.6	52.4			2019-04-25 17:00:00	31.7	1.8	250	51		31.1	2.1	262.4	49.1			2019-04-25 17:00:00	29.3	2	234	57		27.8	4.2	250.8	59.3			2019-04-25 17:00:00	29.9	3.7	280	57		29	4.5	236.3	57.5			2019-04-25 17:00:00	-999.7
2019-04-25 18:00:00	29	1	340	73		30.9	1.3	227	51			2019-04-25 18:00:00	29.6	2.4	260	57		30.4	1.9	244.6	50.9			2019-04-25 18:00:00	27.6	1.5	241	63		27.1	1.9	251.8	59.9			2019-04-25 18:00:00	29.5	5.9	280	56		28.5	5.9	237.3	58			2019-04-25 18:00:00	30
2019-04-25 19:00:00	28.8	2	150	72		30.3	1.9	288.9	51.1			2019-04-25 19:00:00	28.1	0.8	20	69		29.6	1.1	248.8	52.5			2019-04-25 19:00:00	26.9	2.6	221	66		26.7	3.1	223.1	60.9			2019-04-25 19:00:00	29.2	1.5	200	57		28.5	1.9	231.1	56.3			2019-04-25 19:00:00	28.9
2019-04-25 20:00:00	27.9	2.8	350	78		27.9	2.3	105.6	69.3			2019-04-25 20:00:00	28	1.2	30	67		28.6	1.1	118.9	65.6			2019-04-25 20:00:00	26	0.8	2	69		26.2	1	227.5	62.6			2019-04-25 20:00:00	28.8	1.5	290	57		28.3	1.8	231.5	55.9			2019-04-25 20:00:00	29
2019-04-25 21:00:00	27.7	0.7	300	77		27.8	0.9	57.6	67			2019-04-25 21:00:00	27.3	1.7	340	74		28.3	1.9	34.2	65.6			2019-04-25 21:00:00	24.8	0.3	189	79		26	1.8	228.6	63.3			2019-04-25 21:00:00	27.9	0.8	300	71		27.5	1.1	247.5	64.4			2019-04-25 21:00:00	28.1
2019-04-25 22:00:00	27.6	1.3	270	77		27.1	1.2	333.5	71.2			2019-04-25 22:00:00	26.9	0.9	250	75		26.4	1.2	356.3	77.1			2019-04-25 22:00:00	25	0.7	229	85		24.8	1.6	51	82			2019-04-25 22:00:00	26.7	1.1	300	79		26.8	1.4	228	70.7			2019-04-25 22:00:00	27
2019-04-25 23:00:00	27.7	1.1	330	79		26.4	1.2	334	74.9			2019-04-25 23:00:00	27.2	1.1	10	75		26.5	0.7	334.4	75.2			2019-04-25 23:00:00	25.4	0.6	229	80		24.9	0.6	52.4	82			2019-04-25 23:00:00	27.1	0.3	310	76		27.4	0.4	40.7	63.7			2019-04-25 23:00:00	26.8
2019-04-26	26.8	1.1	360	83		26.4	0.8	255.2	71.7			2019-04-26	26.7	1.1	240	78		26.2	0.9	290.9	71.9			2019-04-26	24.9	0	0	83		24.6	0.6	321	82.7			2019-04-26	26.5	1.5	30	73		26.5	1.6	301.5	75.6			2019-04-26	-999.7
2019-04-26 01:00:00	26.8	0.3	999.9	81		25.8	0.4	296.8	70.9			2019-04-26 01:00:00	26.2	1.6	20	80		26	1	243.5	73.7			2019-04-26 01:00:00	23.6	0.3	30	95		23.6	0.5	305	84.2			2019-04-26 01:00:00	25.6	0.4	20	83		25.1	0.5	297.2	78.5			2019-04-26 01:00:00	25.6
2019-04-26 02:00:00	25.9	2.3	80	81		25.8	1.4	305.3	71.7			2019-04-26 02:00:00	26	1.9	10	79		25.6	1.5	257.4	73.8			2019-04-26 02:00:00	23.6	1.3	21	93		23.3	0.5	224.6	83			2019-04-26 02:00:00	25.5	1.1	80	84		24.9	0.2	265	78.1			2019-04-26 02:00:00	25.5
2019-04-26 03:00:00	25.7	2	120	82		25.3	1.6	316.7	72.3			2019-04-26 03:00:00	25.5	0.8	30	80		25.2	1	293.6	74.4			2019-04-26 03:00:00	23.2	0.4	70	93		23.4	0.4	235.3	80.7			2019-04-26 03:00:00	25.3	1.2	60	85		24.9	1.1	254.7	78.8			2019-04-26 03:00:00	-999.7
2019-04-26 04:00:00	25.4	2.7	110	84		25.2	1.6	295.6	72.5			2019-04-26 04:00:00	25.4	1	50	78		25.1	1	305.7	73			2019-04-26 04:00:00	22.7	0.2	0	94		23.1	0.6	37.2	82			2019-04-26 04:00:00	24.8	1.5	70	86		24.4	1.2	34.1	81.1			2019-04-26 04:00:00	24
2019-04-26 05:00:00	25.3	3.3	100	83		25.2	0.2	64.6	72.9			2019-04-26 05:00:00	25.3	2.5	60	77		25.4	0.8	254.1	72.6			2019-04-26 05:00:00	22.9	0.9	34	93		23.3	1.6	46.2	81.8			2019-04-26 05:00:00	24.8	1.2	40	84		24.7	1.3	57.9	78.1			2019-04-26 05:00:00	23.5
2019-04-26 06:00:00	24.9	4.2	100	84		25.5	1.9	114.5	72			2019-04-26 06:00:00	25.1	2.9	60	76		25.6	1	212.2	72.3			2019-04-26 06:00:00	22.8	1.3	40	93		23.5	1.1	72.5	81			2019-04-26 06:00:00	24.5	1.5	40	84		25.3	1.4	47.9	75.3			2019-04-26 06:00:00	23.3
2019-04-26 07:00:00	25	3.9	90	79		25.7	2.8	43.2	71.8			2019-04-26 07:00:00	25.2	2.2	60	75		26.2	1.6	69.8	69			2019-04-26 07:00:00	23.6	1.2	33	87		24.5	1.4	56.9	75.3			2019-04-26 07:00:00	25.4	0.9	20	81		25.9	0.7	40.5	72.2			2019-04-26 07:00:00	24.9
2019-04-26 08:00:00	26.4	3.2	90	68		26.6	2.1	58.6	68.8			2019-04-26 08:00:00	26.6	3.5	50	70		26.5	2.4	44.7	67.6			2019-04-26 08:00:00	24.6	1.9	32	80		25.6	0.9	44.5	69.8			2019-04-26 08:00:00	26.8	0.9	20	78		27.2	0.9	21.5	65.7			2019-04-26 08:00:00	26.3
2019-04-26 09:00:00	27.8	4.2	70	57		27.2	3.9	65	69			2019-04-26 09:00:00	27.1	3.7	60	67		28.1	2.5	61.7	61.5			2019-04-26 09:00:00	25.7	1.6	20	76		26.9	1.2	51.6	63.7			2019-04-26 09:00:00	27.5	1.6	20	72		28.3	1.6	9	62.6			2019-04-26 09:00:00	27.9
2019-04-26 10:00:00	27.3	4.2	80	64		27.5	4.2	58.5	67.1			2019-04-26 10:00:00	27.4	3.7	50	64		28.5	3.2	64.2	61.5			2019-04-26 10:00:00	26.8	1.7	53	68		28.1	1.2	58.1	58.8			2019-04-26 10:00:00	28.5	2.3	10	68		29.8	0.9	314.8	56.7			2019-04-26 10:00:00	27.8
2019-04-26 11:00:00	27.5	2.7	80	63		28.2	3.3	63	63.2			2019-04-26 11:00:00	28.1	3.8	50	64		29.2	3.3	70.9	58.6			2019-04-26 11:00:00	27.1	1.5	32	67		29.4	0.7	13.8	52.1			2019-04-26 11:00:00	29.4	2.5	10	64		30.1	2.8	326.2	58.9			2019-04-26 11:00:00	28.1
2019-04-26 12:00:00	28.9	3.3	80	54		28.5	3.7	65	59.7			2019-04-26 12:00:00	29.5	3.2	60	60		29.7	3.3	76.5	55.2			2019-04-26 12:00:00	27.8	1.6	33	67		28.7	2.4	5.7	60.8			2019-04-26 12:00:00	29.8	2.4	30	63		30	2.9	356.5	56.7			2019-04-26 12:00:00	28.7
2019-04-26 13:00:00	28.5	3.8	70	58		28.3	3.8	71.8	59.1			2019-04-26 13:00:00	29.1	3.7	60	60		29.6	3.7	81.4	53.9			2019-04-26 13:00:00	28.3	1.9	49	67		28.8	2.8	4.3	59.6			2019-04-26 13:00:00	30.4	2.5	360	61		30	3	4.9	55			2019-04-26 13:00:00	28.9
2019-04-26 14:00:00	29	4.8	80	55		28.3	4	68	58.2			2019-04-26 14:00:00	29.2	3.4	60	61		29.5	2.9	79	53.5			2019-04-26 14:00:00	27.9	1	357	68		28.8	1.1	5.6	57.7			2019-04-26 14:00:00	30.9	1.7	20	60		30.2	2.1	4.4	52.6			2019-04-26 14:00:00	-999.7
2019-04-26 15:00:00	29.1	4.1	60	55		28	4.4	71	59.5			2019-04-26 15:00:00	30	3.3	50	60		29.2	3.2	77.7	54.7			2019-04-26 15:00:00	26.6	1.7	5	73		28.1	1.9	100.9	59.8			2019-04-26 15:00:00	29.5	2.4	10	64		30.4	2.8	8.9	52			2019-04-26 15:00:00	28.9
2019-04-26 16:00:00	28	4.8	80	61		27.5	4.8	68.1	62.7			2019-04-26 16:00:00	28	4.1	60	66		28.7	3.9	80.9	58.2			2019-04-26 16:00:00	26.5	0.7	350	76		27.4	2	100.3	60			2019-04-26 16:00:00	28.5	1.8	360	68		30.2	1.8	56.5	54.3			2019-04-26 16:00:00	28.2
2019-04-26 17:00:00	26.7	4.8	100	73		26.8	4.6	76.2	65.2			2019-04-26 17:00:00	26.7	4	60	70		27.8	3.7	71.5	61.8			2019-04-26 17:00:00	25.9	0.6	330	80		27.4	2.2	62.7	65.3			2019-04-26 17:00:00	27.8	1.6	10	71		30.2	1.8	55	53.6			2019-04-26 17:00:00	27.5
2019-04-26 18:00:00	26	4.7	100	79		25.9	4.6	72.4	68.9			2019-04-26 18:00:00	26.4	2.4	60	72		26.7	2.6	70.7	65.4			2019-04-26 18:00:00	24.7	1.8	55	81		26	2.1	62.3	70.9			2019-04-26 18:00:00	26.2	2	20	77		29.5	2.1	41.5	58			2019-04-26 18:00:00	26.7
2019-04-26 19:00:00	25.5	5.4	70	81		25.4	4.5	79.9	71.2			2019-04-26 19:00:00	25.8	2.5	50	75		26	2.4	65.4	68.7			2019-04-26 19:00:00	23.8	1.9	41	85		24.6	2.2	65.1	75			2019-04-26 19:00:00	25.9	1.8	20	79		27.7	2.2	65.8	64.3			2019-04-26 19:00:00	26.2
2019-04-26 20:00:00	25.7	3.3	110	81		25.2	3.6	81.9	72.2			2019-04-26 20:00:00	25.7	3.5	60	76		25.6	3.1	69.3	69.9			2019-04-26 20:00:00	23.4	2	54	87		23.8	2.3	66.8	77.3			2019-04-26 20:00:00	25.9	1.5	10	78		26.6	1.8	68.1	67.5			2019-04-26 20:00:00	25.7
2019-04-26 21:00:00	25.4	4.5	100	82		25.1	4.2	79.4	74.3			2019-04-26 21:00:00	25.6	3.9	60	77		25.5	3.4	66.8	72.4			2019-04-26 21:00:00	23.5	1.5	64	87		23.6	2.2	68.1	77.4			2019-04-26 21:00:00	26.1	1.1	20	75		26	1.4	70.5	68.4			2019-04-26 21:00:00	25.8
2019-04-26 22:00:00	25.4	3.6	70	81		25	3.8	77.9	76.7			2019-04-26 22:00:00	25.5	3.5	70	76		25.3	3.1	63	74.8			2019-04-26 22:00:00	23.4	1.4	68	88		23.6	2	62.5	79.4			2019-04-26 22:00:00	25.7	1.8	50	79		25.8	1.8	72.5	69.4			2019-04-26 22:00:00	25.9
2019-04-26 23:00:00	25.3	4.4	70	81		24.9	4.3	72.6	82			2019-04-26 23:00:00	25.4	3	70	77		25.1	2.8	58.2	79.5			2019-04-26 23:00:00	22.9	0.9	75	91		23.7	1.6	64.7	81.2			2019-04-26 23:00:00	25.5	1.5	100	79		25.7	1.8	80	71.1			2019-04-26 23:00:00	25.7
2019-04-27	24.8	5.1	80	84		24.6	4.9	67.2	81.5			2019-04-27	24.7	3.5	70	81		25	3.3	57.1	80.2			2019-04-27	22.7	3	57	91		23.7	2.2	64.1	83.6			2019-04-27	25.3	1.6	50	79		25.6	1.9	71.6	73.1			2019-04-27	-999.7
2019-04-27 01:00:00	24.2	5.7	80	83		24.4	4.7	74.5	82.5			2019-04-27 01:00:00	24.2	3.9	60	80		24.7	3.6	58.3	80.8			2019-04-27 01:00:00	22.5	3.3	40	90		23.2	2.9	62.6	87.3			2019-04-27 01:00:00	25.3	1.9	50	77		25.5	2.3	69.6	76.1			2019-04-27 01:00:00	25
2019-04-27 02:00:00	23.9	4.9	70	83		24.3	3.7	70.3	82.1			2019-04-27 02:00:00	24.1	3.5	60	79		24.6	2.9	61.4	80.8			2019-04-27 02:00:00	22	3.3	46	90		23	1.8	55.9	88.5			2019-04-27 02:00:00	24.9	3.4	50	77		25.1	3.3	61.9	78.6			2019-04-27 02:00:00	24.6
2019-04-27 03:00:00	24.1	4.3	80	82		24	4.2	68.4	82			2019-04-27 03:00:00	23.9	3.7	70	79		24.3	3.3	68.4	80.5			2019-04-27 03:00:00	21.9	3.5	42	89		22.5	3.1	57.9	89.5			2019-04-27 03:00:00	24.6	2.9	70	77		24.8	3.1	58.9	79.1			2019-04-27 03:00:00	24.8
2019-04-27 04:00:00	24.2	3.3	90	82		24	3.6	79.4	81.9			2019-04-27 04:00:00	24.1	3.4	60	77		24.3	3.3	71.4	79.8			2019-04-27 04:00:00	21.7	3.3	48	89		22.3	3.2	60.8	89.5			2019-04-27 04:00:00	24.5	1.9	30	76		24.5	2.4	63.6	79.3			2019-04-27 04:00:00	24.4
2019-04-27 05:00:00	23.8	4.8	90	82		23.8	4.6	70	82.5			2019-04-27 05:00:00	23.8	4	70	77		24.3	3.8	75.4	80.5			2019-04-27 05:00:00	21.8	4.3	36	88		22.3	3.9	53.5	88.8			2019-04-27 05:00:00	24.4	2	20	76		24.6	2.5	57.3	77.3			2019-04-27 05:00:00	24.3
2019-04-27 06:00:00	23.5	4.5	70	84		24.2	4.3	76.5	80			2019-04-27 06:00:00	23.7	3.3	70	78		24.2	3.4	69	80.7			2019-04-27 06:00:00	21.6	3.6	36	87		22.5	3.6	53.2	88			2019-04-27 06:00:00	24.3	2.1	40	75		24.8	2.6	62.9	76.5			2019-04-27 06:00:00	24.4
2019-04-27 07:00:00	23.6	4.1	90	81		24.7	4.4	74.3	74.6			2019-04-27 07:00:00	23.7	3.3	60	77		24.7	3.4	74.4	75.5			2019-04-27 07:00:00	22.4	3.6	34	85		23.3	4.6	58.3	83.1			2019-04-27 07:00:00	24.6	2.8	60	74		25.6	3.4	55.8	72.9			2019-04-27 07:00:00	24.3
2019-04-27 08:00:00	24.1	4.4	80	79		25	4.5	77.9	70.9			2019-04-27 08:00:00	23.8	3.1	60	79		24.9	3.3	76.6	72			2019-04-27 08:00:00	22.9	2.4	48	81		23.7	3.8	62.6	80.5			2019-04-27 08:00:00	25.5	2.1	50	71		26.6	2.7	59.3	68			2019-04-27 08:00:00	24.6
2019-04-27 09:00:00	23.7	4.8	90	79		25.5	5	75.2	67.6			2019-04-27 09:00:00	23.9	4.3	60	77		25.2	3.9	80.1	69.1			2019-04-27 09:00:00	22.9	3.9	34	84		24	4.4	69.6	75.9			2019-04-27 09:00:00	26.6	4.1	60	67		27.5	4.4	61	62.9			2019-04-27 09:00:00	25.6
2019-04-27 10:00:00	23.2	5.9	100	79		25.8	5.7	79.6	65.5			2019-04-27 10:00:00	23.4	4.3	60	77		25.8	4.2	74.3	66.1			2019-04-27 10:00:00	23.2	4.1	41	82		24.8	4.1	67.7	72.5			2019-04-27 10:00:00	27.2	3.3	60	67		28.4	3.9	61.9	59.5			2019-04-27 10:00:00	27.1
2019-04-27 11:00:00	22.8	3.1	80	83		26	4	78.5	65.6			2019-04-27 11:00:00	23	5	70	78		26.1	4.6	82.1	65.6			2019-04-27 11:00:00	23	4.3	42	81		25.6	5.3	68.1	70.1			2019-04-27 11:00:00	26.6	3.9	60	66		29.1	4.3	58.7	56.9			2019-04-27 11:00:00	27.8
2019-04-27 12:00:00	23.3	6	100	76		26	5.8	76	67.4			2019-04-27 12:00:00	23	5.2	60	78		26.4	4.9	69	65.6			2019-04-27 12:00:00	22.1	4.2	35	83		26	5.1	68.7	69.6			2019-04-27 12:00:00	26.4	3	40	66		29.8	3.7	58.2	54.6			2019-04-27 12:00:00	28
2019-04-27 13:00:00	23	4.4	100	81		25.6	4.9	77.8	70.1			2019-04-27 13:00:00	23	4.1	60	78		26	4.1	73.9	68.5			2019-04-27 13:00:00	23	3.9	49	80		25.6	4.4	68.9	72.8			2019-04-27 13:00:00	27	3.8	50	64		29.9	4.6	52.9	56			2019-04-27 13:00:00	28.1
2019-04-27 14:00:00	23.8	6.1	80	73		26.1	5.9	72.1	70.5			2019-04-27 14:00:00	24	5.3	70	77		26.5	5.1	64.3	68.3			2019-04-27 14:00:00	23.1	3.8	57	81		25.3	5.9	71.9	73.4			2019-04-27 14:00:00	27.7	3.8	70	64		29.4	4.4	60.6	57.6			2019-04-27 14:00:00	-999.7
2019-04-27 15:00:00	23.8	5	100	79		25.8	4.9	76.7	72.8			2019-04-27 15:00:00	24.2	4.5	60	76		26.8	4.7	65.8	68.1			2019-04-27 15:00:00	23.7	3.3	54	79		26.5	4.7	69.1	68.6			2019-04-27 15:00:00	27.1	3.1	60	64		29.8	3.7	59.8	55.8			2019-04-27 15:00:00	-999.7
2019-04-27 16:00:00	23.8	5.1	80	79		25.5	5.2	74.4	76			2019-04-27 16:00:00	24.9	3.8	60	74		26.2	4.3	62.5	72.5			2019-04-27 16:00:00	23.6	3.3	51	79		26.3	4.2	65.7	69.9			2019-04-27 16:00:00	27	2.4	30	65		30.5	3	56.9	52.7			2019-04-27 16:00:00	28
2019-04-27 17:00:00	23.4	5.8	80	83		25.3	5.7	73.4	77			2019-04-27 17:00:00	23.9	4.9	50	76		26	4.3	69.2	73.8			2019-04-27 17:00:00	22.9	4.2	32	81		25.1	4.1	68.6	76			2019-04-27 17:00:00	26.4	3.3	50	67		29.1	4	56.1	59.1			2019-04-27 17:00:00	27.1
2019-04-27 18:00:00	23.2	4.1	80	87		25.3	4.3	77.6	78			2019-04-27 18:00:00	23.4	4.1	50	80		25.7	3.4	72.1	76.7			2019-04-27 18:00:00	22.2	2.9	43	85		24.8	2.5	70.6	75.8			2019-04-27 18:00:00	25.6	2.4	40	69		27.9	2.9	65.6	64.3			2019-04-27 18:00:00	26.4
2019-04-27 19:00:00	23.2	4.6	80	88		25	4.3	74.2	80.5			2019-04-27 19:00:00	23.5	3.5	50	81		25.5	3.4	61.3	78.5			2019-04-27 19:00:00	21.9	2.1	23	87		24.2	2.5	64.7	77.5			2019-04-27 19:00:00	24.3	2.1	20	76		27.3	2.6	67.2	65.5			2019-04-27 19:00:00	24.9
2019-04-27 20:00:00	23.3	3.7	90	89		25.1	3.8	82.1	81.8			2019-04-27 20:00:00	23.4	2.7	60	83		25.7	2.7	73.4	75.8			2019-04-27 20:00:00	21.6	1.8	51	91		24.1	2.4	71.2	80			2019-04-27 20:00:00	24	2.4	20	77		27	2.4	80.8	64.7			2019-04-27 20:00:00	24.4
2019-04-27 21:00:00	23.4	3.5	70	90		25.2	3.8	83.3	83			2019-04-27 21:00:00	23.5	4.1	60	83		25.8	3	47.6	77.7			2019-04-27 21:00:00	21.7	0.5	41	91		24.5	1.4	78.4	79.3			2019-04-27 21:00:00	24.1	0.9	40	78		26.7	1.2	90.4	67.2			2019-04-27 21:00:00	23.8
2019-04-27 22:00:00	23.5	3.2	80	90		25.5	3.2	85.4	75.5			2019-04-27 22:00:00	23.7	2.8	60	83		25.8	2.7	57.5	71.5			2019-04-27 22:00:00	21.5	2	73	94		24.7	1.4	68.9	74.7			2019-04-27 22:00:00	23.8	1.1	70	80		26.9	1.2	104.9	66.1			2019-04-27 22:00:00	23.7
2019-04-27 23:00:00	23.7	3.7	90	91		25.4	3.2	76.5	73.7			2019-04-27 23:00:00	23.8	2.9	60	84		26	1.9	44.5	68.9			2019-04-27 23:00:00	21.6	1.3	29	95		24.5	0.7	79.7	73.8			2019-04-27 23:00:00	23.9	1.5	30	81		27.1	0.5	62.5	65.8			2019-04-27 23:00:00	23.5
2019-04-28	23.9	3.8	80	91		25.3	3.6	74.8	77.9			2019-04-28	24	2.9	60	84		25.8	1.9	23.7	73.7			2019-04-28	21.8	1.3	62	95		24.4	0.5	102.1	74.7			2019-04-28	23.3	1	10	84		26.6	1	155.7	68			2019-04-28	23.1
2019-04-28 01:00:00	24.2	4	80	90		25.4	2.6	73.1	80.7			2019-04-28 01:00:00	24.2	2.5	60	84		25.6	1.4	45.6	77.7			2019-04-28 01:00:00	21.8	0.9	75	96		24.1	0.4	107.4	75.9			2019-04-28 01:00:00	23.5	0.9	60	84		26.1	1	187	72.6			2019-04-28 01:00:00	23
2019-04-28 02:00:00	24.3	3.5	90	91		25.8	3	76.5	75.6			2019-04-28 02:00:00	24.4	1.5	60	83		25.8	0.9	358.8	76.6			2019-04-28 02:00:00	21.8	0.5	204	96		24.1	0.3	134.4	76.7			2019-04-28 02:00:00	23.6	0.2	0	84		25.5	0.3	183.3	79			2019-04-28 02:00:00	22.7
2019-04-28 03:00:00	24.2	2	120	92		25.7	2	73.5	71.9			2019-04-28 03:00:00	24.2	1	50	83		25.7	0.7	355.3	76			2019-04-28 03:00:00	21.5	0.3	175	97		24.3	0.6	172	76.4			2019-04-28 03:00:00	23.6	0.8	110	84		24.9	1	195	86			2019-04-28 03:00:00	23.2
2019-04-28 04:00:00	24	1.4	140	93		25.6	1.4	75.2	69.9			2019-04-28 04:00:00	23.4	0.4	200	87		25.4	0.1	184.5	75			2019-04-28 04:00:00	21.1	0.2	0	97		24.1	0.8	197.8	80.6			2019-04-28 04:00:00	23.7	0	0	83		24.8	1	203	86.3			2019-04-28 04:00:00	23.3
2019-04-28 05:00:00	23.9	0.3	130	91		25.5	0.3	62	70.3			2019-04-28 05:00:00	23.4	0.4	40	87		25.4	0.5	295.3	73.1			2019-04-28 05:00:00	21.9	0	0	93		23.8	1.1	219.8	83			2019-04-28 05:00:00	23.7	0	0	84		24.9	0.9	198.6	85.3			2019-04-28 05:00:00	23.1
2019-04-28 06:00:00	24.1	1.1	220	90		25.7	1	218	69.4			2019-04-28 06:00:00	23	1.4	190	87		25.5	1	242.1	71.5			2019-04-28 06:00:00	21.8	0.3	213	95		23.7	0.6	204.1	85.5			2019-04-28 06:00:00	24	0.1	0	83		25	0.3	235.1	89.5			2019-04-28 06:00:00	23.1
2019-04-28 07:00:00	24.6	1.5	240	84		26.5	1.5	253.5	69.7			2019-04-28 07:00:00	24	1.4	200	85		26.3	1.4	220.6	74			2019-04-28 07:00:00	23.2	1.1	225	86		24.8	2.2	229.4	81.4			2019-04-28 07:00:00	24.2	0.9	170	82		26	1.1	248.6	79.1			2019-04-28 07:00:00	23.7
2019-04-28 08:00:00	25.9	1.4	220	71		27.4	1	219.2	68.9			2019-04-28 08:00:00	25.6	1.5	220	79		28.1	1.6	228.3	67.4			2019-04-28 08:00:00	24.2	1.1	225	83		25.9	1.7	238.9	78.4			2019-04-28 08:00:00	24.9	0.3	260	81		26.4	0.4	263.3	79.4			2019-04-28 08:00:00	24.5
2019-04-28 09:00:00	27.9	2.3	250	62		28.9	1.5	200.9	62			2019-04-28 09:00:00	27.4	1.9	210	71		29.4	1.9	226.2	62			2019-04-28 09:00:00	23.9	1.3	239	86		27	1.7	251.1	71.7			2019-04-28 09:00:00	23.6	2	350	86		27.2	2.3	268.2	73.5			2019-04-28 09:00:00	23.6
2019-04-28 10:00:00	27	3	300	74		30.4	1.9	270.7	56			2019-04-28 10:00:00	26.5	1.8	270	77		30.6	1.9	266.3	55.9			2019-04-28 10:00:00	21.5	0.8	326	98		27.6	1.3	292.1	69.2			2019-04-28 10:00:00	23	2.7	10	89		26.9	2.8	294.8	74.9			2019-04-28 10:00:00	23
2019-04-28 11:00:00	25.6	3.1	320	73		29	3.7	321.5	65.4			2019-04-28 11:00:00	24.3	2	30	83		29.5	2.6	295.5	62.5			2019-04-28 11:00:00	21	0.3	334	98		27.5	3	294.5	67.7			2019-04-28 11:00:00	23.8	1.6	20	86		26.9	2	308.6	72.6			2019-04-28 11:00:00	23.4
2019-04-28 12:00:00	26.2	0.9	270	69		28.3	1.2	320	66.3			2019-04-28 12:00:00	24.6	0.8	250	81		29.2	0.9	299.4	62.2			2019-04-28 12:00:00	21.2	0.9	25	98		27.5	0.7	299.8	66			2019-04-28 12:00:00	24.5	1.7	10	82		26.9	1.9	318.6	71			2019-04-28 12:00:00	24.3
2019-04-28 13:00:00	26	2	270	71		28.2	2.1	320.9	66.9			2019-04-28 13:00:00	25.3	1.5	240	79		29.1	1.4	301	61.8			2019-04-28 13:00:00	22	0.5	23	95		27.7	0.6	296	64			2019-04-28 13:00:00	25.4	2.9	30	81		26.9	2.7	312.5	69.1			2019-04-28 13:00:00	25.3
2019-04-28 14:00:00	26.8	1.7	230	71		28.2	2	319.9	65.6			2019-04-28 14:00:00	25.8	2.3	220	78		29.1	2.1	309.1	60.6			2019-04-28 14:00:00	24	0.8	169	84		27.5	0.9	302	64			2019-04-28 14:00:00	27.5	0.3	360	71		27.1	0.4	309.6	68			2019-04-28 14:00:00	27.3
2019-04-28 15:00:00	27.2	1.6	250	70		27.8	2	322.7	66.3			2019-04-28 15:00:00	26.4	3	220	74		28.3	2.4	323.3	63.6			2019-04-28 15:00:00	24.4	0.3	165	84		27.2	1.4	308.7	64.8			2019-04-28 15:00:00	27.3	1.6	340	69		27.2	1.9	322	67			2019-04-28 15:00:00	28
2019-04-28 16:00:00	27.2	0.6	280	71		26.4	0.8	125.3	67.2			2019-04-28 16:00:00	27	1.9	230	70		27.4	0.6	110.4	65.9			2019-04-28 16:00:00	24.4	0	0	81		26.8	0.8	334.4	66.3			2019-04-28 16:00:00	26.2	1.4	30	70		27.7	1.4	348.6	64.3			2019-04-28 16:00:00	26.4
2019-04-28 17:00:00	27.3	0.8	250	70		27.1	1.1	159.5	64.6			2019-04-28 17:00:00	27.1	0.9	220	66		27.4	1.2	102.6	64.8			2019-04-28 17:00:00	24.9	0.2	0	79		27	1	319.3	64.4			2019-04-28 17:00:00	26.9	1.3	50	66		28.5	1.1	317.3	59.4			2019-04-28 17:00:00	27.4
2019-04-28 18:00:00	27.1	0.7	170	69		26.9	0.8	152.6	64.3			2019-04-28 18:00:00	26.8	0.1	0	67		27.7	0.2	52.9	61.8			2019-04-28 18:00:00	24.2	0	0	84		26	0.9	114.4	73			2019-04-28 18:00:00	26.8	0.9	50	70		28.5	0.3	295.6	60			2019-04-28 18:00:00	27
2019-04-28 19:00:00	26.8	0.2	0	72		27.1	0.3	102.3	61.7			2019-04-28 19:00:00	25.1	0	0	75		27.5	0.2	136.8	61.9			2019-04-28 19:00:00	23.5	0	0	88		26.2	0.7	132.1	70.5			2019-04-28 19:00:00	26.3	0.5	60	74		27.8	0.6	358.3	64.8			2019-04-28 19:00:00	26.3
2019-04-28 20:00:00	26.4	1.6	200	75		26.7	1.6	121	62.7			2019-04-28 20:00:00	25	0.3	310	77		27.1	0.4	37.6	62.3			2019-04-28 20:00:00	23.4	0	0	85		26.1	0.6	115.9	67.1			2019-04-28 20:00:00	26	0.9	30	73		27.6	1.1	130.2	66.6			2019-04-28 20:00:00	25.9
2019-04-28 21:00:00	25.8	0.8	160	76		26.6	1	71	62.3			2019-04-28 21:00:00	24.5	0.9	220	81		26.8	1	346.8	64.9			2019-04-28 21:00:00	22.8	0.3	198	89		25.4	0.5	341	67.1			2019-04-28 21:00:00	25.4	1	50	77		27.2	0.5	53.5	66.9			2019-04-28 21:00:00	25.5
2019-04-28 22:00:00	25.2	1.2	130	80		25.7	1	66.2	73.2			2019-04-28 22:00:00	23.7	0.2	0	83		26.6	0.3	29.7	64.1			2019-04-28 22:00:00	22.5	0.9	214	86		25.2	0.4	100.1	66.9			2019-04-28 22:00:00	24.6	1.1	50	83		26.9	0.5	131.8	68.1			2019-04-28 22:00:00	24.7
2019-04-28 23:00:00	24.8	2.8	130	85		25.1	1.5	72.6	79.6			2019-04-28 23:00:00	23.8	0.5	60	81		26.1	0.6	283	65.6			2019-04-28 23:00:00	21.6	0.7	214	91		25	0.8	183.7	70.6			2019-04-28 23:00:00	23.9	1.3	60	83		26.3	1.4	179.6	69.2			2019-04-28 23:00:00	24.4
2019-04-29	24.4	1.6	110	88		25.2	1	144.8	69.2			2019-04-29	23.9	0.8	80	79		25.7	0.9	277.4	66.7			2019-04-29	21.8	0	0	88		24.8	0.8	266.1	70.4			2019-04-29	23.7	1.2	100	83		25.6	0.7	260.8	76.7			2019-04-29	23.9
2019-04-29 01:00:00	24.1	1.3	120	89		25	1.1	60.3	69.2			2019-04-29 01:00:00	23.9	1.7	60	78		25.3	1.6	282.4	67.7			2019-04-29 01:00:00	21.2	0.4	184	92		23.9	0.9	292.5	79.7			2019-04-29 01:00:00	23.5	0.7	100	82		25.2	0.8	0.8	84.3			2019-04-29 01:00:00	23.5
2019-04-29 02:00:00	23.7	0.9	130	90		24.6	0.7	87.1	75.9			2019-04-29 02:00:00	23	0.3	70	83		25.1	0.4	265.1	69.9			2019-04-29 02:00:00	21.5	0.5	215	90		23.3	0.4	277.9	88.9			2019-04-29 02:00:00	23.5	0.8	90	81		24.8	0.8	81.5	78.6			2019-04-29 02:00:00	23.4
2019-04-29 03:00:00	24	0.9	130	90		24.1	0.4	38.1	80.7			2019-04-29 03:00:00	22.6	1.1	210	86		24.6	0.5	286.6	72.8			2019-04-29 03:00:00	21.3	0.3	214	92		23.1	0.6	296	90.8			2019-04-29 03:00:00	23.3	0	0	84		24.6	0.2	313.7	80.8			2019-04-29 03:00:00	23.2
2019-04-29 04:00:00	24	1.3	140	88		23.4	1.3	78	87			2019-04-29 04:00:00	22.3	0.8	210	86		24.5	0.6	159.2	73.5			2019-04-29 04:00:00	21.3	0	0	93		22.6	0.2	345.8	93.8			2019-04-29 04:00:00	23.4	0.3	80	82		24.1	0.2	155.9	83.4			2019-04-29 04:00:00	23.2
2019-04-29 05:00:00	23.5	0.7	200	89		23.4	0.9	72.7	87.1			2019-04-29 05:00:00	22.4	1	210	84		23.9	0.8	290	78			2019-04-29 05:00:00	21	0	0	94		22.3	0.7	310.9	95.5			2019-04-29 05:00:00	23.1	1.4	60	84		23.7	1.1	68.7	81.4			2019-04-29 05:00:00	23.2
2019-04-29 06:00:00	23.6	1.6	180	85		23.5	0.8	92.4	85.6			2019-04-29 06:00:00	22.5	0.8	200	84		23.9	0.5	285.5	80.4			2019-04-29 06:00:00	21.7	0	0	89		22.5	0.2	308.6	93.8			2019-04-29 06:00:00	23.3	0	0	84		24	0.1	304.8	79.1			2019-04-29 06:00:00	23.2
2019-04-29 07:00:00	24.4	1.4	160	80		24.4	0.8	276.9	80.8			2019-04-29 07:00:00	23.8	0.4	230	82		24.7	0.3	21.4	77.7			2019-04-29 07:00:00	22.7	0	0	91		23.8	0.6	292.8	86.2			2019-04-29 07:00:00	24	0.8	60	83		25	0.2	204.2	77.9			2019-04-29 07:00:00	24.1
2019-04-29 08:00:00	26	1.7	120	69		25.4	1.4	310.4	75.3			2019-04-29 08:00:00	25.6	0.9	50	74		26	0.8	32	72.6			2019-04-29 08:00:00	26	0.4	102	75		25.2	0.8	303.6	75.6			2019-04-29 08:00:00	25.7	0.3	60	77		26.2	0.4	181	72			2019-04-29 08:00:00	26.8
2019-04-29 09:00:00	27.7	0.5	170	58		27	0.5	340.9	67.1			2019-04-29 09:00:00	27.5	0.9	290	67		27.7	0.6	291.9	65.1			2019-04-29 09:00:00	26.5	0.8	39	75		26.8	0.6	235	65.5			2019-04-29 09:00:00	28	0.2	0	68		27.8	0.3	217.4	63.5			2019-04-29 09:00:00	27.7
2019-04-29 10:00:00	30	0.8	260	50		28.8	0.7	214.2	58.2			2019-04-29 10:00:00	28.8	1.1	230	62		29.4	1.2	309.2	55.8			2019-04-29 10:00:00	28.2	0.7	208	64		28	1.5	265.4	55			2019-04-29 10:00:00	28.6	1.1	270	65		28.9	1.4	255.3	54.5			2019-04-29 10:00:00	27.7
2019-04-29 11:00:00	31.4	0.4	240	46		30.4	0.6	213.7	50.7			2019-04-29 11:00:00	31	1.5	190	59		31	0.9	324.2	49.2			2019-04-29 11:00:00	28.3	0.6	231	62		29.1	0.5	286.8	50.7			2019-04-29 11:00:00	29.5	1.8	300	66		29.2	2	261.6	54.2			2019-04-29 11:00:00	29.5
2019-04-29 12:00:00	32.2	0.7	230	46		31.3	0.9	282.5	49.4			2019-04-29 12:00:00	31.9	1.5	230	54		30.4	1.5	340.2	56.4			2019-04-29 12:00:00	29.6	1	238	63		29.7	0.9	271.4	51.4			2019-04-29 12:00:00	30	2.1	300	65		29.3	2.3	272.2	56.1			2019-04-29 12:00:00	29.6
2019-04-29 13:00:00	32.6	1.2	320	51		30.4	1.6	332.7	53.6			2019-04-29 13:00:00	31	1.7	70	61		30.9	1.9	314.9	53.9			2019-04-29 13:00:00	27.7	0.8	331	71		29.2	1.9	287.6	55			2019-04-29 13:00:00	29.9	2.3	300	67		29.2	2.7	266.8	57.3			2019-04-29 13:00:00	30.1
2019-04-29 14:00:00	31.2	1.7	310	56		30	2	343.8	55.8			2019-04-29 14:00:00	31.6	2.4	250	60		30.9	2.1	320	53.2			2019-04-29 14:00:00	27.9	0.6	271	64		28.9	1	282.8	58.4			2019-04-29 14:00:00	29.4	1.5	300	66		29.1	1.8	261.4	58			2019-04-29 14:00:00	30
2019-04-29 15:00:00	30.4	0.9	350	61		29	1.2	54.6	63.7			2019-04-29 15:00:00	30.1	1.9	260	59		30.3	2.2	347.1	55.5			2019-04-29 15:00:00	28.3	1.3	232	61		28.8	2	285.6	58.7			2019-04-29 15:00:00	29.1	1.4	280	62		28.9	1.8	261.4	59			2019-04-29 15:00:00	29
2019-04-29 16:00:00	29.7	0.3	999.9	63		29.6	0.4	325.8	59.4			2019-04-29 16:00:00	29.9	2.2	240	60		30	1.9	358.7	56.4			2019-04-29 16:00:00	27.2	1	237	67		28.5	1.1	287.6	58.9			2019-04-29 16:00:00	28.7	1.5	300	68		28.8	1.8	257.9	59.3			2019-04-29 16:00:00	-999.7
2019-04-29 17:00:00	29.1	1.9	10	67		29.5	1.1	323	55.6			2019-04-29 17:00:00	29.2	2	250	62		29.7	1.8	355.7	58			2019-04-29 17:00:00	26.7	0.7	242	70		27.9	1.7	276.9	60.8			2019-04-29 17:00:00	27.4	1.5	290	69		28.8	1.7	242.4	59			2019-04-29 17:00:00	28.8
2019-04-29 18:00:00	28.9	0.6	210	70		28.6	0.7	30.8	63.9			2019-04-29 18:00:00	28.2	1.3	260	66		29.2	1.3	354.1	60.2			2019-04-29 18:00:00	26	0.6	243	73		27.7	0.7	242	61.2			2019-04-29 18:00:00	26.8	0.3	310	73		28.5	0.4	225.7	59.6			2019-04-29 18:00:00	26.9
2019-04-29 19:00:00	28.1	0.5	70	73		27.6	0.7	78	71.6			2019-04-29 19:00:00	27.5	0.2	0	67		28.8	0.3	50.4	61.4			2019-04-29 19:00:00	25.2	0.9	221	76		27.4	1.2	226	65.6			2019-04-29 19:00:00	26.7	1.2	310	72		28.1	1.3	217.5	62.9			2019-04-29 19:00:00	26.3
2019-04-29 20:00:00	27.6	0.2	0	76		27.2	0.3	82.4	74.7			2019-04-29 20:00:00	26.1	0.2	0	74		27.8	0.3	89.2	72.3			2019-04-29 20:00:00	23.9	0	0	85		26.9	0.4	244.1	65.8			2019-04-29 20:00:00	26.4	0.7	250	74		27.9	0.8	214.4	65.5			2019-04-29 20:00:00	26.3
2019-04-29 21:00:00	27.6	0.8	210	75		27.4	0.6	71.7	73.9			2019-04-29 21:00:00	26.4	0.7	220	74		27.7	0.7	17.7	74.1			2019-04-29 21:00:00	23.6	0.5	190	86		26.3	0.8	250.9	67.9			2019-04-29 21:00:00	25.9	0.5	90	79		27.5	0.6	207.7	68			2019-04-29 21:00:00	25.6
2019-04-29 22:00:00	27.1	0.7	190	79		27.4	0.6	188.4	73.9			2019-04-29 22:00:00	25.5	0.6	210	79		27.4	0.8	265.4	74.7			2019-04-29 22:00:00	24	0.7	221	84		25.7	1.8	234.7	73.7			2019-04-29 22:00:00	25.6	0.8	90	81		27.3	1	211.7	68.6			2019-04-29 22:00:00	25.7
2019-04-29 23:00:00	26.4	0.9	200	83		27.2	0.9	223.3	75			2019-04-29 23:00:00	24.9	1.3	190	82		27	1.2	240.7	75.6			2019-04-29 23:00:00	23.6	1.4	210	88		25.5	1.3	235.2	74.8			2019-04-29 23:00:00	24.9	1.2	80	84		27.3	1.1	244.7	68.6			2019-04-29 23:00:00	25.9
2019-04-30	25.9	1.1	170	84		26.9	1	195.5	75.3			2019-04-30	24.5	1.5	210	83		26.9	1.5	239.7	73.1			2019-04-30	23.5	0.7	216	89		25.4	1.1	214.3	74.6			2019-04-30	25	1.3	100	83		26.6	0.7	284.3	72.6			2019-04-30	26.3
2019-04-30 01:00:00	25.7	1.1	150	84		26.6	0.8	197.2	74.8			2019-04-30 01:00:00	24.7	0.4	210	82		26.6	0.6	252	71.5			2019-04-30 01:00:00	23.2	0.8	213	89		25.1	1	239.9	75.9			2019-04-30 01:00:00	24.8	1.1	100	81		26.6	1	210.4	72.7			2019-04-30 01:00:00	26.6
2019-04-30 02:00:00	25.3	1.1	180	87		26.1	1.1	181.1	74.9			2019-04-30 02:00:00	24.2	0.6	220	85		26.5	0.8	215.3	71.5			2019-04-30 02:00:00	22.8	1.1	216	90		24.9	1.3	182.3	77.2			2019-04-30 02:00:00	24.7	1.3	100	78		26.2	1.3	224.3	75.4			2019-04-30 02:00:00	26.5
2019-04-30 03:00:00	25	2.2	180	87		25.8	1.3	159.2	76			2019-04-30 03:00:00	23.9	1.3	200	86		26.1	1.4	275.4	73			2019-04-30 03:00:00	22.8	1	216	87		24.3	0.8	210.3	79.6			2019-04-30 03:00:00	24.3	0.7	80	79		26	0.8	227.5	81			2019-04-30 03:00:00	26.5
2019-04-30 04:00:00	24.9	1.4	170	87		25.5	1.1	168.8	76.6			2019-04-30 04:00:00	23.5	0.5	200	87		25.7	0.6	251.8	74.5			2019-04-30 04:00:00	22	0.4	206	88		24.5	0.5	199.6	80			2019-04-30 04:00:00	24.1	1.1	110	77		26	0.5	229.7	86.4			2019-04-30 04:00:00	26.5
2019-04-30 05:00:00	24.4	1.5	170	88		25.2	1.6	156.8	77.4			2019-04-30 05:00:00	23.4	0.9	210	87		25.7	0.8	171.1	74.5			2019-04-30 05:00:00	21.6	0	0	91		25.1	1	190.5	79.1			2019-04-30 05:00:00	24	1.5	110	77		26.1	1.4	240.1	83.1			2019-04-30 05:00:00	26.4
2019-04-30 06:00:00	24.7	0.8	180	86		25.5	0.8	163.8	75.7			2019-04-30 06:00:00	23.5	0.7	200	87		25.8	0.5	323.1	74.1			2019-04-30 06:00:00	22.8	1.2	217	79		24.9	0.7	239.9	83			2019-04-30 06:00:00	23.8	1.5	100	79		25.9	1.5	206.4	79.5			2019-04-30 06:00:00	25.9
2019-04-30 07:00:00	25.5	0.9	160	79		26.7	0.5	159.7	69.9			2019-04-30 07:00:00	24.5	1.3	200	84		26.9	0.7	133.5	69.7			2019-04-30 07:00:00	24	0.8	203	76		25.5	1.4	240.8	77.6			2019-04-30 07:00:00	25.4	1.9	120	70		26.9	2.2	208.3	73.2			2019-04-30 07:00:00	27
2019-04-30 08:00:00	27.1	1.2	200	64		28	0.6	298.9	66			2019-04-30 08:00:00	26.3	1.1	230	76		28.5	1.3	263.5	65.2			2019-04-30 08:00:00	26.9	0.6	144	69		26.8	1	236.1	69.9			2019-04-30 08:00:00	27.5	0.3	120	63		28.9	0.6	220.2	61.3			2019-04-30 08:00:00	28.9
2019-04-30 09:00:00	29.7	0.7	230	53		29.3	0.8	340.6	60.4			2019-04-30 09:00:00	28.8	0.4	120	66		29.7	0.5	291.6	58.7			2019-04-30 09:00:00	27.3	1.8	222	68		28.4	1.6	229.5	61.8			2019-04-30 09:00:00	30.5	0.8	280	66		29.9	1.1	226.9	58.4			2019-04-30 09:00:00	29.9
2019-04-30 10:00:00	31.5	0.5	200	49		30.7	0.2	301.4	53.1			2019-04-30 10:00:00	31.6	2.1	220	54		31	0.6	95.8	51.4			2019-04-30 10:00:00	29.1	1.1	211	66		29.5	2.4	237.6	54.6			2019-04-30 10:00:00	31.6	1.8	240	59		29.9	2.3	247.7	62.8			2019-04-30 10:00:00	30.3
2019-04-30 11:00:00	32.7	2	230	43		32.1	1	295.5	46.3			2019-04-30 11:00:00	32.4	1.8	240	53		32.3	1.5	161.7	44.9			2019-04-30 11:00:00	30.9	1.7	229	58		29.4	1.6	257.2	61.1			2019-04-30 11:00:00	30.3	5.3	280	71		29.6	5.5	250.8	64.7			2019-04-30 11:00:00	29.1
2019-04-30 12:00:00	33	0.9	280	50		32.2	1.2	45.6	52.4			2019-04-30 12:00:00	31.6	2	280	60		33.4	1.8	229.3	41.9			2019-04-30 12:00:00	29.2	1.4	236	70		29	3	257.3	67.4			2019-04-30 12:00:00	28.9	4.3	280	77		29.2	5.1	253.5	67.5			2019-04-30 12:00:00	28.9
2019-04-30 13:00:00	32.1	2.6	300	59		30.6	2.9	60.3	63			2019-04-30 13:00:00	31.8	3.8	230	63		32.2	4	262.8	55			2019-04-30 13:00:00	29	1.8	237	73		28.7	4	257.8	66.2			2019-04-30 13:00:00	28.8	4.1	270	75		29.1	4.8	252	66.3			2019-04-30 13:00:00	28.6
2019-04-30 14:00:00	31.8	2.5	280	58		27.9	2.9	60.6	72.5			2019-04-30 14:00:00	31.4	3.1	270	65		31.9	2.9	260.9	53.8			2019-04-30 14:00:00	27	1.3	240	80		28.3	3.1	254.6	66.3			2019-04-30 14:00:00	28.4	5.8	280	76		29.3	6.1	248.9	64.8			2019-04-30 14:00:00	29
2019-04-30 15:00:00	30.5	2.3	280	66		28.3	2.7	68.7	71.9			2019-04-30 15:00:00	29.6	2.5	270	69		28.6	1.7	72.2	70.3			2019-04-30 15:00:00	26.4	1.4	235	80		28.1	2.3	255.2	67.8			2019-04-30 15:00:00	28.1	3	280	75		29	3.7	247.4	66.7			2019-04-30 15:00:00	28.9
2019-04-30 16:00:00	29.3	2.1	290	70		27.5	2.5	82.8	69.1			2019-04-30 16:00:00	28.7	3.6	230	68		27.7	3.2	79	70.1			2019-04-30 16:00:00	26.5	1.1	237	78		27.7	3.2	255.1	68.7			2019-04-30 16:00:00	28.9	3	280	72		28.6	3.7	246.3	69.1			2019-04-30 16:00:00	28.5
2019-04-30 17:00:00	29.2	2.2	290	67		28.5	2.4	145.8	65.6			2019-04-30 17:00:00	28.5	2.6	240	66		27.9	1.2	108.4	68.2			2019-04-30 17:00:00	26.5	1.6	235	75		27	2.6	255.2	72.8			2019-04-30 17:00:00	27.8	4.6	280	74		28.1	5.4	246.9	72.4			2019-04-30 17:00:00	28.4
2019-04-30 18:00:00	28.8	2.4	300	69		27.2	2.1	120.1	69.4			2019-04-30 18:00:00	27.8	2.3	270	70		27	1.7	144.3	71.3			2019-04-30 18:00:00	26.1	1.2	232	76		26.2	2.6	254.4	76.4			2019-04-30 18:00:00	27.9	2.3	280	71		27.2	3	243.7	76.2			2019-04-30 18:00:00	27.8
2019-04-30 19:00:00	28.3	1.4	280	70		26.7	1.6	77.5	78.9			2019-04-30 19:00:00	27.4	2.6	260	69		27.4	0.8	4.4	71.2			2019-04-30 19:00:00	26	1.4	240	72		25.7	2.5	245	78.6			2019-04-30 19:00:00	28	3	280	63		27.1	3.6	235.2	75.7			2019-04-30 19:00:00	27.4
2019-04-30 20:00:00	27.2	1.8	310	77		26.7	1.2	19.6	80.1			2019-04-30 20:00:00	26.9	3.2	270	75		27.8	2.3	268.4	69			2019-04-30 20:00:00	25.8	1.2	251	72		25.8	1.1	224.8	76.2			2019-04-30 20:00:00	27.9	3.4	280	66		27.3	3.8	238.7	71.9			2019-04-30 20:00:00	28.1
2019-04-30 21:00:00	27	0.9	330	76		26.3	1	265.9	82.3			2019-04-30 21:00:00	26.4	1.5	270	74		26.8	1.4	287.7	78.1			2019-04-30 21:00:00	23.7	0.4	254	88		25.4	1	297	82.8			2019-04-30 21:00:00	26.2	2	310	81		27.3	2.3	246.2	71.9			2019-04-30 21:00:00	27.9
2019-04-30 22:00:00	27	0.5	200	75		26.1	0.7	287.9	81.1			2019-04-30 22:00:00	26	1.4	240	76		26.6	1.2	295.2	78.5			2019-04-30 22:00:00	23.1	0.4	1	93		25.3	0.9	281.8	81.6			2019-04-30 22:00:00	27.8	1.4	290	63		27.1	1.6	250.8	73.7			2019-04-30 22:00:00	27.9
2019-04-30 23:00:00	26.8	0.9	50	76		25.7	1	330.8	82.1			2019-04-30 23:00:00	26	1	210	77		26.5	0.9	327.4	79			2019-04-30 23:00:00	23.1	0.3	177	94		25.3	0.9	268	80.6			2019-04-30 23:00:00	26.3	1.5	310	77		26.8	1.7	248.6	76			2019-04-30 23:00:00	28.2
2019-05-01	24.7	2.6	90	89		25.8	2.1	323	81.9			2019-05-01	25.3	0.7	230	81		26.5	0.7	308.2	79.8			2019-05-01	22.9	0.5	58	96		25	0.5	269.5	82.2			2019-05-01	25.5	3.2	290	81		26.8	2.3	247.1	73.6			2019-05-01	26
2019-05-01 01:00:00	24.1	1.9	110	93		25.6	2	313.5	82.8			2019-05-01 01:00:00	24.7	0.6	999.9	84		26.2	0.8	316.2	81.4			2019-05-01 01:00:00	22.5	0	0	96		24.8	0.9	271.1	85.3			2019-05-01 01:00:00	25	1.4	310	87		26.7	1.6	257.4	72.4			2019-05-01 01:00:00	27.4
2019-05-01 02:00:00	24.3	0.6	30	95		25.3	0.7	332.7	82.6			2019-05-01 02:00:00	24.1	0.2	0	88		26	0.3	323.5	81.2			2019-05-01 02:00:00	22.9	0.3	232	95		25.2	0.6	186.6	79.2			2019-05-01 02:00:00	24.2	1.1	310	90		26.5	1.3	230.6	72.3			2019-05-01 02:00:00	23.8
2019-05-01 03:00:00	24.3	0.6	90	94		24	0.8	79.9	86.9			2019-05-01 03:00:00	24.3	0.9	230	85		25.2	0.9	47.7	83			2019-05-01 03:00:00	21.8	0.8	234	98		24.8	1.3	221.1	80			2019-05-01 03:00:00	23.1	0.7	290	91		25.1	0.9	241.2	77.4			2019-05-01 03:00:00	24.6
2019-05-01 04:00:00	23.7	1.5	160	97		23.5	1.9	78.7	88.7			2019-05-01 04:00:00	23.8	1.8	210	90		24.1	1.3	80.8	87			2019-05-01 04:00:00	21.8	0.5	233	96		23.7	1	206.6	86.5			2019-05-01 04:00:00	23.4	1.3	330	92		25.4	1.7	206.8	77.5			2019-05-01 04:00:00	24.7
2019-05-01 05:00:00	23.7	1.5	210	99		23.5	2.1	67.5	87.5			2019-05-01 05:00:00	23.2	2.1	210	91		23.9	2.1	56.3	87			2019-05-01 05:00:00	21.3	0.4	321	98		23.5	2.8	59.1	93.3			2019-05-01 05:00:00	22.8	2.5	360	94		26.6	3.1	205.2	67			2019-05-01 05:00:00	23.1
2019-05-01 06:00:00	23.5	1	360	100		22.6	1.3	311	96.2			2019-05-01 06:00:00	22	3.5	40	88		22.3	2.5	16.2	93.8			2019-05-01 06:00:00	19.7	2.2	14	98		21.7	1.3	329.1	97.7			2019-05-01 06:00:00	22.1	2.6	340	92		22.5	2.8	348.2	95.9			2019-05-01 06:00:00	22.9
2019-05-01 07:00:00	21.6	2	160	99		22.3	2.1	44.3	92.4			2019-05-01 07:00:00	20.9	2.2	40	88		22.1	2.1	20.2	93.5			2019-05-01 07:00:00	19.4	0.9	9	98		21.3	4.2	356.4	98			2019-05-01 07:00:00	21.4	2.5	30	91		22	3.1	341.7	91.7			2019-05-01 07:00:00	22.1
2019-05-01 08:00:00	20.8	1.5	80	99		21.9	1	35.4	93.2			2019-05-01 08:00:00	20.5	1.9	20	89		21.5	2.1	350.7	87.9			2019-05-01 08:00:00	18.7	1.2	12	98		19.9	1.1	7.5	94.7			2019-05-01 08:00:00	20.9	1.6	20	91		21.7	1.9	12.4	84.7			2019-05-01 08:00:00	21.2
2019-05-01 09:00:00	20.4	1.3	100	99		21.2	1.3	305.2	90.2			2019-05-01 09:00:00	19.9	2.2	30	90		20.9	2.1	347.5	87.6			2019-05-01 09:00:00	18.3	1.5	25	98		19.4	0.7	5	93			2019-05-01 09:00:00	20.1	2	30	91		21.5	2	20.2	83.7			2019-05-01 09:00:00	20.4
2019-05-01 10:00:00	20.6	1.4	160	99		21.4	1.6	274	83.7			2019-05-01 10:00:00	19.7	2.5	30	89		20.5	3.1	350.9	86.8			2019-05-01 10:00:00	18	1.9	20	98		19.1	3	349.1	93.1			2019-05-01 10:00:00	19.8	2.5	30	92		20.9	2.7	25.4	85.9			2019-05-01 10:00:00	20.2
2019-05-01 11:00:00	20.2	0.8	40	99		20.6	1.2	293.3	87.3			2019-05-01 11:00:00	19.7	2.6	20	88		20.4	3	352.9	87.7			2019-05-01 11:00:00	17.7	1.1	18	98		19	2.4	21	91.6			2019-05-01 11:00:00	19.7	2.1	30	91		21.1	2.4	15.7	82			2019-05-01 11:00:00	19.9
2019-05-01 12:00:00	20.3	0.3	150	99		20.6	0.5	341.9	85.1			2019-05-01 12:00:00	19.6	1.8	40	89		20.9	1.9	4.2	81.8			2019-05-01 12:00:00	17.5	0.9	16	98		19.1	1.4	6.9	91.1			2019-05-01 12:00:00	19.7	2	30	91		21	2.4	32.7	81.8			2019-05-01 12:00:00	19.5
2019-05-01 13:00:00	20.6	0.8	270	99		21.3	0.5	321.7	79.2			2019-05-01 13:00:00	19.5	0.1	0	90		21	0.4	350.9	81.9			2019-05-01 13:00:00	17.7	0.8	49	98		19.5	0.5	10.8	86.2			2019-05-01 13:00:00	19.4	1.5	80	92		21.4	1.6	29.9	77.6			2019-05-01 13:00:00	19.3
2019-05-01 14:00:00	20.7	1.4	260	97		20.8	1.5	322.4	81.5			2019-05-01 14:00:00	19.8	1.9	230	90		20.5	1.7	354.1	85			2019-05-01 14:00:00	18.1	0.5	84	98		18.9	0.7	358.7	91.4			2019-05-01 14:00:00	19.8	1.1	110	92		20.4	1.3	10.8	85.5			2019-05-01 14:00:00	19.5
2019-05-01 15:00:00	21	0.7	60	96		20.5	0.9	328.4	83.4			2019-05-01 15:00:00	20.2	1.1	230	89		20.3	1.1	355.2	86.6			2019-05-01 15:00:00	18.1	0.7	172	98		18.6	0.5	348.5	93.7			2019-05-01 15:00:00	19.8	1	90	93		20.2	1.2	19.6	87.3			2019-05-01 15:00:00	20
2019-05-01 16:00:00	20.9	1	150	96		20.3	1.3	316.9	81.4			2019-05-01 16:00:00	20.7	1.7	20	82		19.8	1.5	1.5	86.7			2019-05-01 16:00:00	17.9	0.6	131	98		18.3	1.3	16.2	91.7			2019-05-01 16:00:00	19.9	1.4	60	91		19.8	1.7	25.8	86.6			2019-05-01 16:00:00	20.3
2019-05-01 17:00:00	21	2	30	93		21	1.5	304.9	78			2019-05-01 17:00:00	20.7	1.3	20	83		20.8	1.4	356.3	79.5			2019-05-01 17:00:00	17.9	0.8	92	98		18.4	0.6	25.9	93.5			2019-05-01 17:00:00	20.3	1.3	60	88		20.1	1.5	60.3	86			2019-05-01 17:00:00	19.9
2019-05-01 18:00:00	20.1	1.7	70	97		20.4	0.8	297.2	80.4			2019-05-01 18:00:00	20.7	1.6	50	83		19.5	1.3	338.6	83.5			2019-05-01 18:00:00	17.8	1.2	46	98		18.5	0.8	46.5	92.5			2019-05-01 18:00:00	20	2.1	80	89		20.2	2.2	84.8	85.3			2019-05-01 18:00:00	19.9
2019-05-01 19:00:00	20.6	1.5	140	95		20	1.4	172.5	84.3			2019-05-01 19:00:00	20.6	1.1	60	82		20.1	0.8	209.2	82.6			2019-05-01 19:00:00	17.9	1.3	76	97		18.3	1.9	62.4	89.7			2019-05-01 19:00:00	20.3	2.1	70	86		19.8	2.5	64.9	87.6			2019-05-01 19:00:00	20
2019-05-01 20:00:00	20.7	2.4	130	95		20.2	1.7	181.5	81.8			2019-05-01 20:00:00	20.2	1.9	60	84		20.1	1.1	187.5	82.2			2019-05-01 20:00:00	17.9	1.6	68	96		18.4	0.9	80	87.8			2019-05-01 20:00:00	20.2	3	60	84		20.4	3.2	60.5	78.3			2019-05-01 20:00:00	20.1
2019-05-01 21:00:00	20.8	1.9	110	94		20.5	1.6	158.1	79.2			2019-05-01 21:00:00	20.6	2.1	60	81		20.6	1	129.7	78			2019-05-01 21:00:00	18.1	2	62	92		18.4	1.2	55.8	87.6			2019-05-01 21:00:00	20.3	2.7	80	81		20.8	2.9	66.4	75.2			2019-05-01 21:00:00	20.2
2019-05-01 22:00:00	20.7	2.5	120	88		20.9	1.8	102.2	75.4			2019-05-01 22:00:00	20.8	3.2	60	77		20.8	2.1	97	75.4			2019-05-01 22:00:00	18.3	3.6	46	88		18.9	1.8	51	84.7			2019-05-01 22:00:00	20.5	2.7	50	76		21.2	2.9	59.8	71.9			2019-05-01 22:00:00	20.3
2019-05-01 23:00:00	20.6	3.5	120	83		21.1	2.8	88.6	72.8			2019-05-01 23:00:00	20.8	2.9	60	74		20.9	2.3	81.1	75			2019-05-01 23:00:00	18.1	3.6	46	85		18.7	2.6	59	84.3			2019-05-01 23:00:00	20.2	2.6	40	76		20.9	3.2	53.5	73.3			2019-05-01 23:00:00	20
2019-05-02	20.2	2.3	140	85		20.7	2.3	104.9	72.8			2019-05-02	20.5	2.1	60	74		21	1.9	82.4	73			2019-05-02	18.3	3.8	29	81		18.5	2	57.3	84.8			2019-05-02	20.2	2.2	50	74		20.6	2.7	48.3	74			2019-05-02	-999.7
2019-05-02 01:00:00	20.7	2.9	130	78		20.5	2.3	98.6	72.3			2019-05-02 01:00:00	20.7	2.2	60	73		20.7	2	84.1	72.1			2019-05-02 01:00:00	18.8	3	47	72		18.4	2.5	49.9	82.4			2019-05-02 01:00:00	21.2	3	50	63		20.6	3.3	43.5	72			2019-05-02 01:00:00	19.8
2019-05-02 02:00:00	20.9	2.8	130	76		20.5	2.4	101.8	70			2019-05-02 02:00:00	20.9	2	60	72		20.7	1.8	90.2	70.4			2019-05-02 02:00:00	18.9	3	36	71		18.3	3	50	80.3			2019-05-02 02:00:00	22.1	3.9	50	54		20.6	4.1	44.3	69.4			2019-05-02 02:00:00	20.2
2019-05-02 03:00:00	21.4	1.9	120	74		20.5	2	99.1	68.9			2019-05-02 03:00:00	20.9	2.2	60	72		20.5	2.1	86.2	69.6			2019-05-02 03:00:00	19.3	2.2	49	66		18.6	2.6	49.8	78.1			2019-05-02 03:00:00	22.1	2.7	50	55		20.7	3.1	43.9	66.8			2019-05-02 03:00:00	20.6
2019-05-02 04:00:00	21.2	2.9	140	75		20.6	2.5	100.8	68			2019-05-02 04:00:00	20.8	2.1	60	72		20.7	2	89.9	68.3			2019-05-02 04:00:00	19.6	3.4	40	66		18.7	2.2	49.3	74.8			2019-05-02 04:00:00	22.4	4.2	70	52		21	4.2	47.4	63.7			2019-05-02 04:00:00	20.6
2019-05-02 05:00:00	21.4	2.4	140	75		20.8	2.2	105.7	68.4			2019-05-02 05:00:00	21.4	2.3	50	68		21	2	83.1	67.1			2019-05-02 05:00:00	19.5	3.1	33	68		19	2.3	50.1	74.2			2019-05-02 05:00:00	22.2	2.3	40	56		21.3	2.8	52.1	60.8			2019-05-02 05:00:00	19.9
2019-05-02 06:00:00	21.7	2	80	73		21.3	2.1	102.8	64			2019-05-02 06:00:00	21.5	1.8	60	70		21.6	1.8	94.2	63.2			2019-05-02 06:00:00	19.5	2.8	49	73		19.5	2.2	51.2	67.7			2019-05-02 06:00:00	22.1	2.6	30	62		21.8	3.1	57.8	57.9			2019-05-02 06:00:00	19.8
2019-05-02 07:00:00	21.8	2.4	110	74		22.8	2.7	91.8	57.5			2019-05-02 07:00:00	21	2.4	60	73		22.8	2.5	79.9	57.6			2019-05-02 07:00:00	19.6	4.3	38	72		20.7	3	60.1	66.1			2019-05-02 07:00:00	22	2.9	30	66		22.3	3.6	58.1	58.4			2019-05-02 07:00:00	19.6
[truncated: 70 more columns]

## Sheet: Fig.S5、S6
	Zhongshan																						Banqiao																						Pingzhen
	OBS.										MOD.												OBS.										MOD.												OBS.
	PM2.5	PM10	SO2	NO	NO2	CO	O3	NH3	NMHC		PM2.5	PM10	SO2	NO	NO2	CO	O3	NH3	NMHC				PM2.5	PM10	SO2	NO	NO2	CO	O3	NH3	NMHC		PM2.5	PM10	SO2	NO	NO2	CO	O3	NH3	NMHC				PM2.5	PM10	SO2	NO	NO2
	μg m-3	μg m-3	ppb	ppb	ppb	ppm	ppb	ppb	ppm		μg m-3	μg m-3	ppb	ppb	ppb	ppm	ppb	ppb	ppm				μg m-3	μg m-3	ppb	ppb	ppb	ppm	ppb	ppb	ppm		μg m-3	μg m-3	ppb	ppb	ppb	ppm	ppb	ppb	ppm				μg m-3	μg m-3	ppb	ppb	ppb
2024-04-01	11	22	3	1	8.3	0.28	52.9		0.06		12.0601	20.7525	1.163	0.19	3.257	0.18454	42.905	5.289	0.03149			2024-04-01											13.3939	24.0887	0.707	0.045	3.89	0.17483	43.235	7.414	0.03213			2024-04-01	11	23	1.6	0.4	5.8
2024-04-01 01:00:00	19	18	2	0.6	7.2	0.24	52.9		0.05		10.9723	18.6974	1.055	0.171	2.443	0.1613	43.375	5.829	0.01038			2024-04-01 01:00:00											11.4747	20.3942	1.163	0.038	2.939	0.15384	43.575	7.645	0.01508			2024-04-01 01:00:00	12	20	1.7	0.6	5.5
2024-04-01 01:59:59	14	16	2.4	0.7	6.9	0.24	52		0.05		11.075	19.221	1.057	0.242	3.331	0.16913	43.384	6.807	0.01046			2024-04-01 01:59:59											13.2196	22.8197	1.051	0.055	3.732	0.15766	44.276	8.428	0.01321			2024-04-01 01:59:59	6	17	2.1	0.7	4.5
2024-04-01 02:59:59	20	26	2.3	0.4	7.2	0.22	51.1		0.05		9.38783	17.3194	0.471	0.467	4.725	0.18001	42.676	6.65	0.01333			2024-04-01 02:59:59											12.3176	21.0974	1.001	0.114	6.611	0.17413	44.07	8.558	0.01922			2024-04-01 02:59:59	10	19	2.4	0.7	4.5
2024-04-01 03:59:59	14	24	1.8	0.8	7	0.23	50.2		0.05		6.67887	11.8284	0.324	1.236	10.225	0.28437	38.913	6.914	0.02524			2024-04-01 03:59:59											9.72073	16.7105	0.82	0.274	13.101	0.23147	42.061	8.175	0.02508			2024-04-01 03:59:59	10	17	2.1	1.3	4.8
2024-04-01 04:59:59	8	18	1.2	0.6	8.4	0.27	51.7		0.06		6.5812	9.16057	0	2.4	18.666	0.49541	31.976	6.143	0.04853			2024-04-01 04:59:59											5.91579	9.77304	0.753	0.445	23.022	0.3508	38.311	8.37	0.03673			2024-04-01 04:59:59	13	23	1.7	0.8	5.8
2024-04-01 05:59:59	5	15	1.2	1.8	17.9	0.35	42.9		0.07		7.41006	11.1097	3.047	3.081	22.133	0.51118	28.884	6.842	0.07129			2024-04-01 05:59:59											8.5067	14.4703	3.67	0.675	30.97	0.36689	34.643	8.306	0.05127			2024-04-01 05:59:59	13	15	1.9	1.5	10.7
2024-04-01 06:59:59	5	18	2.3	7	34	0.67	26.6		0.14		4.28515	8.21528	2.179	4.086	24.583	0.48318	24.743	3.767	0.11078			2024-04-01 06:59:59											6.96974	15.6225	1.362	1.014	32.675	0.35417	30.574	3.726	0.08338			2024-04-01 06:59:59	12	14	2.2	3.1	17.4
2024-04-01 07:59:59	9	14	2.8	12.9	40.5	0.9	20		0.22		4.24036	18.1446	1.983	3.086	18.661	0.42209	31.906	6.557	0.10001			2024-04-01 07:59:59											3.91694	13.5297	2.137	1.496	26.183	0.36606	34.834	8.873	0.09728			2024-04-01 07:59:59	3	17	2.6	2.6	17.7
2024-04-01 08:59:59	7	22	2.5	13.1	41	0.69	19.9		0.17		6.20463	24.9515	1.787	3.546	17.659	0.47047	28.939	4.71	0.12848			2024-04-01 08:59:59											6.87165	21.8502	1.092	1.58	11.02	0.31556	34.066	5.934	0.10337			2024-04-01 08:59:59	1	20	2.3	2.8	17
2024-04-01 09:59:59	10	26	3.8	8.1	34.8	0.54	25.2		0.13		11.7238	34.344	4.235	4.736	19.167	0.45438	26.393	5.416	0.14183			2024-04-01 09:59:59											8.09896	25.439	0.765	1.811	13.058	0.30317	31.198	5.03	0.10901			2024-04-01 09:59:59
2024-04-01 10:59:59	6	24	3.4	5.9	26.1	0.45	35.1		0.12		9.37576	30.1991	1.521	4.016	15.819	0.40116	28.013	0.036	0.13331			2024-04-01 10:59:59											7.33061	24.8422	0	2.348	12.137	0.29431	31.435	3.776	0.11917			2024-04-01 10:59:59	4	21	2.4	3.7	14.7
2024-04-01 11:59:59	10	21	2.8	5.1	24.4	0.44	37.3		0.1		5.24365	23.9744	3.565	3.024	12.459	0.37884	33.862	4.139	0.12168			2024-04-01 11:59:59											6.06522	23.9026	1.077	2.09	8.616	0.27202	35.473	5.055	0.11018			2024-04-01 11:59:59	4	14	2.5	3.1	14.2
2024-04-01 12:59:59	8	24	3.1	4.6	25.3	0.45	36.1		0.11		5.09878	20.1992	3.172	2.578	12.051	0.38487	36.822	3.849	0.08953			2024-04-01 12:59:59											4.98723	18.8988	1.332	1.409	9.199	0.28274	38.357	4.968	0.08838			2024-04-01 12:59:59	9	20	2.2	2.1	12.1
2024-04-01 13:59:59	17	31	3.1	7.5	32.3	0.52	29.5		0.16		6.29985	20.2869	2.018	2.539	13.326	0.40852	34.764	4.106	0.11753			2024-04-01 13:59:59											4.43996	16.1327	1.027	1.141	9.801	0.30042	38.302	5.588	0.09694			2024-04-01 13:59:59	9	29	2.8	2.1	15.7
2024-04-01 14:59:59	14	33	3.2	7.7	34.3	0.53	28.8		0.15		9.24462	28.017	0	3.002	14.796	0.42485	30.013	1.769	0.11539			2024-04-01 14:59:59	8	19	1	3	25.1	0.4	35				6.37727	23.1742	0.147	1.475	10.468	0.31709	33.947	5.609	0.10974			2024-04-01 14:59:59	13	23	2.4	2.3	16.8
2024-04-01 15:59:59	11	41	2.7	8.3	36.8	0.57	25.7		0.17		9.87597	34.8427	2.137	4.259	17.813	0.48872	28.143	4.413	0.13174			2024-04-01 15:59:59	9	22	1	2.7	25.5	0.44	32.4		0.19		7.58841	29.4919	0.583	1.621	11.12	0.32503	33.092	6.188	0.11442			2024-04-01 15:59:59	10	31	2	2.4	15.1
2024-04-01 16:59:59	10	48	3.2	7.7	38	0.7	26		0.18		12.0809	40.227	4.999	4.394	23.884	0.57549	24.332	5.179	0.16476			2024-04-01 16:59:59	8	31	1	1.7	23.6	0.51	33.4		0.18		8.94291	33.558	1.364	1.882	14.581	0.34544	31.215	6.549	0.13856			2024-04-01 16:59:59	10	28	1.8	2.3	13.5
2024-04-01 17:59:59	14	42	3.2	7	38.1	0.77	28.8		0.19		17.0278	47.1726	6.138	3.347	23.398	0.55345	26.827	4.64	0.11668			2024-04-01 17:59:59	5	34	1	1.7	22.9	0.57	34.4		0.16		13.3701	37.9787	1.924	1.702	16.901	0.38038	30.803	6.866	0.1302			2024-04-01 17:59:59	11	40	1.8	1.9	14.1
2024-04-01 18:59:59	20	47	3.5	5.2	37.8	0.7	29.5		0.18		20.5505	49.4101	6.493	4.025	27.15	0.70206	24.75	4.957	0.13928			2024-04-01 18:59:59	9	32	1.1	0.9	17.6	0.48	42.6		0.12		16.3715	36.2385	1.653	1.554	15.248	0.37865	33.12	5.797	0.12239			2024-04-01 18:59:59	20	34	2	1.6	11.8
2024-04-01 19:59:59	14	44	2.7	2.5	28.6	0.56	39.1		0.15		21.1083	46.2887	4.97	3.11	24.902	0.73252	26.66	5.195	0.12981			2024-04-01 19:59:59	13	36	1	0.5	14.2	0.42	49.2		0.1		16.5748	32.7864	1.375	0.926	10.705	0.34841	38.273	5.26	0.09479			2024-04-01 19:59:59	18	30	2.3	1.4	9.8
2024-04-01 20:59:59	16	46	3	2.6	32.9	0.63	35.7		0.16		21.4478	46.5565	3.223	1.926	20.356	0.65148	31.618	5.568	0.11938			2024-04-01 20:59:59	12	36	0.9	0.6	13.2	0.4	51.9		0.09		16.8808	33.0695	1.033	0.636	8.383	0.32577	41.373	5.409	0.08574			2024-04-01 20:59:59	19	29	2.5	1.2	9
2024-04-01 21:59:59	13	48	2.3	1	19.7	0.48	50.2		0.11		21.3711	45.5031	3.091	1.24	16.37	0.56751	34.942	6.586	0.11643			2024-04-01 21:59:59	14	37	0.9	0.8	11.2	0.37	54.1		0.08		17.6809	34.2748	1.099	0.463	7.142	0.30028	42.342	6.025	0.07926			2024-04-01 21:59:59	8	28	2.3	1.3	6.8
2024-04-01 22:59:59	21	39	2.1	1.4	18	0.43	50.7		0.1		20.6613	41.1528	1.211	0.456	9.058	0.42226	41.016	6.321	0.0812			2024-04-01 22:59:59	16	40	0.7	0.4	9.6	0.36	54.8		0.05		17.7824	33.1114	0.819	0.18	3.758	0.25689	45.687	6.011	0.0622			2024-04-01 22:59:59	14	27	2.4	1.1	5.7
2024-04-01 23:59:59	15	45	2.1	1.1	11.7	0.38	57.7		0.08		20.1524	37.7943	0.835	0.326	7.099	0.34705	42.542	7.766	0.06438			2024-04-01 23:59:59	19	39	1.3	0.4	7	0.32	57.2		0.05		17.8726	31.9499	0.747	0.098	2.224	0.21721	47.305	6.15	0.03872			2024-04-01 23:59:59	16	30	2.7	1	5.4
2024-04-02 00:59:59	15	46	1.9	0.4	7.6	0.31	60.5		0.07		19.1188	34.6235	0.842	0.218	5.409	0.26088	43.536	6.795	0.02207			2024-04-02 00:59:59	17	41	1.3	0.7	7	0.27	56.3		0.06		17.7129	30.435	0.646	0.087	2.289	0.21453	46.502	7.377	0.02863			2024-04-02 00:59:59	19	32	2.6	1	6.3
2024-04-02 01:59:59	16	43	2.1	0.4	6.8	0.29	61.1		0.05		19.1032	33.266	0.819	0.253	5.439	0.25689	43.343	6.397	0.01829			2024-04-02 01:59:59	12	42	1.3	0.8	6.3	0.26	55.6		0.05		17.6431	29.2467	0.583	0.101	2.676	0.21704	45.426	7.044	0.02239			2024-04-02 01:59:59	19	41	2.6	1.1	5.9
2024-04-02 02:59:59	19	43	1.9	0.5	6.5	0.28	60.7		0.05		19.412	33.3555	0.869	0.472	8.046	0.28661	40.759	6.085	0.0217			2024-04-02 02:59:59	12	42	1.3	1	6.3	0.26	55.6		0.06		18.2586	29.474	0.562	0.188	4.234	0.23539	43.958	6.6	0.02615			2024-04-02 02:59:59	20	40	2.5	1.2	6.3
2024-04-02 03:59:59	22	42	2	0.3	7.5	0.28	59.8		0.05		20.0139	34.3278	0.94	1.19	14.932	0.42248	35.104	5.582	0.03249			2024-04-02 03:59:59	17	38	1.2	1	6.7	0.25	54.7		0.05		18.8062	30.0131	0.59	0.48	9.664	0.32166	38.968	7.388	0.03676			2024-04-02 03:59:59	17	38	2.7	0.7	6.6
2024-04-02 04:59:59	22	35	2.6	0.5	11.2	0.31	53.1		0.05		19.6294	33.9243	0.916	2.851	25.274	0.74025	26.798	5.253	0.05962			2024-04-02 04:59:59	19	36	1	0.6	8.4	0.27	50.2		0.07		17.1945	27.2468	0.551	1.029	18.482	0.50769	31.488	7.821	0.05662			2024-04-02 04:59:59	10	38	2.8	1.2	7.8
2024-04-02 05:59:59	26	32	2.7	1.9	21.7	0.43	42.5		0.07		19.2116	34.4155	3.95	3.249	29.385	0.73987	23.354	4.966	0.07899			2024-04-02 05:59:59	17	33	1.1	0.8	13.7	0.35	44.5		0.08		14.84	24.0912	1.687	1.721	26.921	0.58923	24.049	8.069	0.07706			2024-04-02 05:59:59	13	27	2.8	1.7	12.8
2024-04-02 06:59:59	23	37	2.8	4	28.9	0.63	34.9		0.12		18.7009	37.1567	5.042	5.535	32.846	0.74009	18.784	5.695	0.12848			2024-04-02 06:59:59	19	29	1.2	1.8	23	0.56	36.4		0.15		13.3255	24.6106	1.878	2.989	24.408	0.51779	25.67	7.04	0.09968			2024-04-02 06:59:59	13	28	2.9	2.8	20.4
2024-04-02 07:59:59	21	34	3.3	9	40.2	0.92	23.1		0.21		11.2452	17.7094	2.797	5.781	23.613	0.61128	26.616	5.327	0.11427			2024-04-02 07:59:59	17	34	1.5	2.9	32.6	0.72	28.3		0.21		10.1676	15.2033	1.184	3.274	18.129	0.4674	31.454	6.934	0.10263			2024-04-02 07:59:59	19	24	3.5	2.5	22.6
2024-04-02 08:59:59	18	34	3.3	7.3	39.8	0.77	22.5		0.19		8.58942	12.798	0.831	6.795	21.471	0.58432	27.597	4.001	0.14423			2024-04-02 08:59:59	15	37	1.4	3.6	33.8	0.67	26		0.23		9.91668	14.0751	0.42	5.957	18.634	0.62074	31.373	4.901	0.26652			2024-04-02 08:59:59	10	33	3.8	3.6	26.7
2024-04-02 09:59:59	18	27	3.6	8.2	35.9	0.66	25.7		0.18		9.0468	12.9641	0.736	6.655	18.507	0.49641	32.113	3.359	0.13609			2024-04-02 09:59:59	17	26	1.3	4	29	0.53	29.8		0.19		11.995	16.823	1.984	8.026	16.768	0.54268	35.314	4.466	0.25474			2024-04-02 09:59:59	18	36	4	4.6	25.4
2024-04-02 10:59:59	13	28	4	9.8	37.2	0.67	22.6		0.18		10.8586	14.938	0.78	7.96	13.004	0.42878	41.771	2.579	0.12342			2024-04-02 10:59:59			1.7	4.8	29	0.55					13.0827	18.3199	2.512	6.442	12.029	0.44762	45.942	3.445	0.22863			2024-04-02 10:59:59	10	33	3.4	4	23
2024-04-02 11:59:59	6	23	4.2	8.4	31.8	0.59	27.9		0.15		12.1274	17.0368	0.749	5.771	12.819	0.42275	46.482	2.565	0.12471			2024-04-02 11:59:59	14	15					29.1		0.28		13.9704	19.9986	1.647	2.846	7.71	0.37781	52.847	3.142	0.20669			2024-04-02 11:59:59	9	31	4	4.3	21.9
2024-04-02 12:59:59	8	23	4.1	9.3	31.7	0.66	27.6		0.17		12.9387	18.457	0.683	4.411	12.515	0.41859	47.267	2.558	0.09846			2024-04-02 12:59:59	14	18	1.9	4.8	24.7	0.58	32.5		0.19		12.12	17.1217	1.906	2.987	10.581	0.43235	53.25	3.631	0.1999			2024-04-02 12:59:59	13	29	3.5	3	19.6
2024-04-02 13:59:59	12	21	4.5	11.6	39.3	0.76	19.6		0.21		10.5357	15.6197	0.558	5.071	12.519	0.44342	47.36	3.018	0.12449			2024-04-02 13:59:59	13	22	1.5	4.7	33	0.67	24.3		0.24		6.92434	9.82269	0.78	2.194	5.716	0.34563	54.052	3.053	0.16496			2024-04-02 13:59:59	26	58	4.8	2.3	28.4
2024-04-02 14:59:59	16	34	4.7	22.7	50.5	1.02	8.9		0.31		9.69478	14.954	0.332	4.927	13.025	0.48082	44.652	3.022	0.13102			2024-04-02 14:59:59	16	28	1.5	6.4	45.6	0.9	12.7		0.37		9.4459	14.3578	0.17	2.302	6.654	0.38449	51.296	2.956	0.17772			2024-04-02 14:59:59	37	67	4.9	1.9	30.9
2024-04-02 15:59:59	14	35	4.9	21.3	48.1	1.08	9.9		0.31		7.29266	11.4679	0.313	5.787	15.567	0.52879	40.412	3.202	0.13975			2024-04-02 15:59:59	17	46	2.8	34.2	57.8	1.35	3.1		0.69		9.34355	15.3191	0.09	2.625	8.764	0.43532	49.713	3.595	0.21367			2024-04-02 15:59:59	43	70	5.3	1.4	29.5
2024-04-02 16:59:59	13	28	4.7	21	44.5	1.02	13.9		0.28		5.44549	9.8068	0.889	5.236	22.054	0.62116	31.728	4.131	0.17754			2024-04-02 16:59:59	25	59	3.2	22.3	58.3	1.2	2.7		0.77		8.83771	15.4743	1.758	3.018	14.387	0.48157	43.331	4.281	0.26649			2024-04-02 16:59:59	40	63	3.5	1.4	23.7
2024-04-02 17:59:59	13	39	5.4	32.8	53.9	1.4	2.9		0.42		5.88623	11.3547	1.812	5.214	31.475	0.78733	21.413	5.836	0.19704			2024-04-02 17:59:59	34	47	2.8	17.4	52.3	1.42	6		0.71		10.1174	18.362	4.098	2.673	23.987	0.62499	32.682	5.837	0.32136			2024-04-02 17:59:59	42	61	4.4	1.4	27.3
2024-04-02 18:59:59	16	53	7	53.3	57.2	1.86	1.9		0.76		8.09047	14.7121	1.989	7.65	37.265	0.99659	14.002	7.042	0.23027			2024-04-02 18:59:59	32	60	2.6	16.1	51.9	1.42	4.6		0.67		11.1754	18.1767	5.088	3.381	27.866	0.74359	26.883	8.506	0.38068			2024-04-02 18:59:59	43	57	3.7	1.5	27.9
2024-04-02 19:59:59	19	46	7.1	45.8	51.7	1.43	1.4		0.48		11.256	19.439	1.508	8.305	39.698	1.20364	10.424	7.667	0.2544			2024-04-02 19:59:59	25	37	1.9	11	46.2	1.36	4.4		0.62		14.6999	21.8787	4.89	2.89	29.715	0.88827	23.509	10.037	0.41379			2024-04-02 19:59:59	44	43	3.4	1.6	26.3
2024-04-02 20:59:59	28	41	6.9	35.1	49.1	1.4	2.3		0.46		13.8066	22.999	1.327	8.535	41.569	1.26905	7.874	9.879	0.29952			2024-04-02 20:59:59	22	46	1.9	17.8	43.9	1.31	2.4		0.59		19.4461	27.8637	4.287	2.851	33.028	1.00108	18.398	13.46	0.51241			2024-04-02 20:59:59	37	66	3.3	2	32.5
2024-04-02 21:59:59	23	38	7.1	50.8	46.8	1.86	1.6		0.53		18.2021	28.7476	1.527	8.166	44.103	1.4794	5.796	14.206	0.38641			2024-04-02 21:59:59	23	51	2.4	31.2	47.1	1.69	2.2		0.74		23.3011	32.3745	4.986	2.603	36.146	1.06436	15.964	15.172	0.59782			2024-04-02 21:59:59	34	43	2.6	1.2	18.8
2024-04-02 22:59:59	26	54	8	38.9	50.1	1.69	1.5		0.6		23.8104	34.584	1.74	2.916	40.573	1.42216	9.182	17.531	0.449			2024-04-02 22:59:59	33	64	5.6	24.2	48.2	1.6	2.3		0.82		25.8532	34.2124	3.225	0.851	30.335	0.93216	19.461	15.155	0.54753			2024-04-02 22:59:59	27	34	2.6	0.9	17.6
2024-04-02 23:59:59	19	64	5.2	26.2	50.1	1.55	1.6		0.66		30.2426	40.1343	2.2	1.271	34.588	1.14032	14.597	16.481	0.43167			2024-04-02 23:59:59	42	74	5.8	10.5	42.9	1.08	5.5		0.55		26.5341	36.3606	1.376	0.333	18.315	0.621	31.228	11.809	0.31016			2024-04-02 23:59:59	26	35	3.8	1.5	12.6
2024-04-03 00:59:59	29	80	5	8.9	40.1	1.06	3.6		0.58		40.8274	52.5833	2.406	1.166	29.995	0.88272	16.852	16.88	0.3516			2024-04-03 00:59:59	44	67	3.4	1.5	24.2	0.64	12.9		0.43		34.3145	52.4103	1.405	0.271	13.243	0.47007	38.92	10.4	0.15082			2024-04-03 00:59:59	18	30	2	2	9.6
2024-04-03 01:59:59	33	59	2.8	2	21	0.57	26.4		0.17		46.424	66.6994	1.993	0.838	23.025	0.65112	26.626	11.59	0.20694			2024-04-03 01:59:59	36	55	2.8	0.7	15	0.37	28.1		0.15		38.7963	60.0483	1.588	0.33	12.689	0.43672	41.019	8.975	0.1191			2024-04-03 01:59:59	13	35	1.4	1.8	8.3
2024-04-03 02:59:59	35	36	1	1	9	0.3	42.2		0.08		38.3149	60.7744	1.253	1.023	19.388	0.54014	35.543	7.074	0.12101			2024-04-03 02:59:59	22	34	2	1.2	6.8	0.24	39.7		0.09		32.5144	51.3822	1.225	0.557	13.18	0.42705	42.403	6.86	0.12103			2024-04-03 02:59:59	14	31	1.6	2	8.4
2024-04-03 03:59:59	19	22	0.1	1.3	8.2	0.33	42.2		0.08		30.5615	48.9572	0.98	2.902	29.957	0.73284	26.941	8.124	0.12298			2024-04-03 03:59:59	13	30	2.4	1	8.7	0.28	34		0.13		30.2741	47.182	0.956	1.361	19.645	0.55537	37.336	7.538	0.12219			2024-04-03 03:59:59	14	27	1.5	2.3	10.4
2024-04-03 04:59:59	8	22		1.7	12.6	0.42	35.1		0.1		24.1074	36.9998	1.008	9.492	45.498	1.30817	11.713	7.518	0.17398			2024-04-03 04:59:59	14	23	3.2	1	12.9	0.36	26.8		0.14		28.8003	43.1877	0.906	3.347	31.709	0.93641	24.849	7.756	0.15902			2024-04-03 04:59:59	20	21	1.6	2.4	14.5
2024-04-03 05:59:59	6	27	0.6	2.4	20.3	0.48	26.1		0.17		18.5599	27.4592	2.586	18.178	50.746	1.42912	4.151	6.824	0.21759			2024-04-03 05:59:59	17	29	3.2	1.4	21.3	0.44	20.9		0.17		25.6709	38.0374	3.777	6.874	40.034	1.01893	14.343	6.504	0.19132			2024-04-03 05:59:59	14	24	2	2.7	25.7
2024-04-03 06:59:59	12	39	2	11.2	34.3	0.88	12.1		0.28		14.0655	20.8053	3.63	25.022	48.319	1.32226	3.152	6.81	0.27737			2024-04-03 06:59:59	20	32	2.5	3.1	27.4	0.67	17.4		0.24		19.199	28.1928	3.833	9.408	39.086	0.92378	12.195	5.912	0.26641			2024-04-03 06:59:59	11	29	1.5	3.3	27.2
2024-04-03 07:59:59	13	48	2.7	15.4	39.5	1.22	12.2		0.37		9.26895	18.2319	2.39	18.388	41.135	1.07845	6.143	6.225	0.2713			2024-04-03 07:59:59	20	47	2.7	6.1	31.5	0.83	17.2		0.31		8.74732	14.0172	2.463	8.344	30.651	0.7841	16.983	5.434	0.26422			2024-04-03 07:59:59	11	30	1.9	4.4	28.8
2024-04-03 08:59:59	14	56	3.3	17.6	43.9	1.11	10.9		0.4		9.36119	20.2554	1.405	5.863	25.443	0.65858	19.711	4.644	0.24588			2024-04-03 08:59:59	19	54	4	7.5	35.9	0.68	14.3		0.37		8.53667	14.4701	0.881	5.492	18.155	0.37015	27.12	3.301	0.17268			2024-04-03 08:59:59	13	28	2.1	4.5	30.1
2024-04-03 09:59:59									0.5		11.1389	21.3321	2.544	4.806	21.87	0.55288	24.476	4.055	0.22874			2024-04-03 09:59:59	21	56	3.6	5.9	31.9	0.6	18.5		0.42		11.1364	19.5303	2.983	4.669	17.592	0.34688	29.529	3.578	0.16824			2024-04-03 09:59:59	13	29	1.9	3.5	23.1
2024-04-03 10:59:59	7	57		13.6	45.4	0.92	10				17.529	27.6403	2.655	7.328	11.859	0.41299	38.981	2.625	0.16948			2024-04-03 10:59:59	17	49	3.2	4.1	28.1	0.53	21.5		0.32		13.2734	21.8903	3.899	4.508	14.089	0.32159	36.83	3.229	0.15937			2024-04-03 10:59:59	9	35	1.8	3.1	23.9
2024-04-03 11:59:59	14	53	2.3			0.92	12.2		0.38		20.525	31.6774	2.348	4.725	11.265	0.4239	43.93	2.92	0.17714			2024-04-03 11:59:59	13	42	2.6	3	28.1	0.56	22.2		0.35		17.2633	25.9924	2.399	4.52	8.491	0.30085	47.147	2.735	0.13924			2024-04-03 11:59:59	12	37	1.7	3.9	24.8
2024-04-03 12:59:59	16	49	2.2	32.9	44.4	1.06	9		0.4		20.3133	31.852	2.198	4.294	9.472	0.43662	49.793	2.785	0.14827			2024-04-03 12:59:59		29	2.7	3	24.3	0.48	25.8		0.21		15.3962	22.6056	2.203	2.778	8.271	0.3021	51.533	2.955	0.12172			2024-04-03 12:59:59	14	32	1.3	4.2	30.4
2024-04-03 13:59:59	23	45	3.2	29.6	45.3	1.12	9.7		0.46		15.8115	24.3176	1.56	1.972	12.03	0.46266	47.937	3.188	0.1756			2024-04-03 13:59:59	12	32	3.3	2.7	20.1	0.39	30.7		0.22		11.1668	16.272	1.569	1.533	9.276	0.29412	50.372	2.904	0.1357			2024-04-03 13:59:59	13	34	1.3	6.4	24.2
2024-04-03 14:59:59	16	52	3.4	16	34.1	0.77	23.1		0.33		9.15603	18.0193	0.877	1.524	15.567	0.55366	42.251	3.606	0.20646			2024-04-03 14:59:59	13	32	3.4	2.3	16.6	0.37	36.1		0.19		9.33038	14.0621	0.468	1.341	11.061	0.32311	46.958	3.335	0.14895			2024-04-03 14:59:59	16	32	1.6	4.1	16.1
2024-04-03 15:59:59	26	58	3.1	24.9	45.6	1.13	13.8		0.43		11.7018	25.6141	0.724	1.936	18.032	0.62459	37.943	4.206	0.22509			2024-04-03 15:59:59	16	35	2.9	3	27.5	0.56	27.7		0.31		7.46151	12.1903	0.288	2.944	10.34	0.32783	46.559	3.432	0.14857			2024-04-03 15:59:59	13	37	1.6	3	20.5
2024-04-03 16:59:59	23	60	4.5	29	52.6	1.48	6.9		0.6		13.492	33.6656	2.473	2.835	22.259	0.79968	33.189	5.364	0.29658			2024-04-03 16:59:59	17	46	4.6	3.4	36.1	0.77	20		0.45		6.34133	13.422	3.163	2.462	18.636	0.3742	35.762	4.252	0.20435			2024-04-03 16:59:59	25	37	1.3	2.6	21.8
2024-04-03 17:59:59	29	62	4.8	66.3	58.4	2.19	1.9		0.73		17.1202	39.9625	4.728	2.056	30.088	1.00288	23.682	6.651	0.31805			2024-04-03 17:59:59	19	51	5.6	2.3	42.6	1.06	13.6		0.55		7.2045	15.9946	6.642	2.871	26.751	0.46449	26.504	5.968	0.24132			2024-04-03 17:59:59	16	48	3.4	3.5	35
2024-04-03 18:59:59	18	69	4.8	58.2	55.1	1.83	1.5		0.67		16.1652	32.5344	1.863	1.984	28.429	1.07119	23.319	0.586	0.30249			2024-04-03 18:59:59	23	61	5.9	20.7	54.6	1.79	3.8		0.89		8.09524	16.8008	7.967	3.358	30.184	0.55213	22.759	7.465	0.27402			2024-04-03 18:59:59	26	50	2.2	13.8	44.3
2024-04-03 19:59:59	24	71	4.4	52.4	47.4	1.65	1		0.61		22.135	47.508	5.047	2.837	36.38	1.37398	15.477	7.92	0.37553			2024-04-03 19:59:59	25	63	4.5	29.7	51.2	1.55	2.2		0.77		9.80068	20.2898	7.937	2.724	31.272	0.61397	21.067	8.265	0.29624			2024-04-03 19:59:59	18	45	2.7	11	43.1
2024-04-03 20:59:59	22	58	4	49.6	49.8	1.52	1.3		0.59		25.5559	55.9046	5.234	2.409	38.637	1.57993	13.142	10.971	0.43228			2024-04-03 20:59:59	27	61	4.1	41.8	49.2	1.78	2.2		0.82		12.6996	23.8448	8.218	3.627	38.988	0.77023	12.33	12.384	0.42564			2024-04-03 20:59:59	24	42	4.7	13.2	45
2024-04-03 21:59:59	25	59	4.7	90.6	47.4	2.09	1.5		0.71		30.3858	70.3868	6.204	2.45	39.11	1.8617	12.072	18.068	0.55627			2024-04-03 21:59:59	24	49	3.2	39.1	43	1.71	2.2		0.81		16.7965	30.7814	9.453	4.867	43.342	0.91506	7.025	18.56	0.5597			2024-04-03 21:59:59	22	45	4.6	16.3	40.8
2024-04-03 22:59:59	21	40	3.2	23.3	33	0.98	11.1		0.32		23.3348	48.8802	2.535	1.006	38.15	1.2856	9.376	13.939	0.35688			2024-04-03 22:59:59	19	45	3	26	39.2	1.3	3.5		0.5		22.7714	41.3693	2.865	1.734	38.222	1.00018	10.941	19.378	0.5762			2024-04-03 22:59:59	18	38	4.2	5.2	34.6
2024-04-03 23:59:59	17	18	0.8	1	13.3	0.39	38.3		0.09		13.7034	31.9753	0.631	0.217	16.534	0.51778	27.787	10.727	0.13531			2024-04-03 23:59:59	11	25	1.4	1.5	17.5	0.47			0.13		19.2036	29.2498	0.838	0.332	20.257	0.63387	23.314	15.662	0.25722			2024-04-03 23:59:59	25	44	4.1	8.7	43
2024-04-04 00:59:59	11	24	0.8	0.4	6.7	0.32	44.1		0.06		8.14358	18.075	1.538	0.17	11.193	0.35099	33.93	10.265	0.05762			2024-04-04 00:59:59	4	23	1.4	1.9	8.4	0.29			0.07		14.2247	19.446	0.629	0.183	8.876	0.32881	34.132	12.784	0.11664			2024-04-04 00:59:59	20	21	1.9	1.3	10
2024-04-04 01:59:59	11	27	0.4		5.5	0.29	45.6		0.05		3.95487	11.5157	0	0.176	7.523	0.26435	37.394	8.244	0.02979			2024-04-04 01:59:59	5	25	2	2	8.9	0.28			0.11		12.6699	17.5024	0.383	0.161	5.421	0.25258	41.085	7.77	0.06859			2024-04-04 01:59:59	25		1.4	1.6	8.4
2024-04-04 02:59:59	7	21	0.1		4.8	0.26	46.8		0.05		6.56831	17.0625	0.271	0.511	15.128	0.40706	29.741	15.159	0.04341			2024-04-04 02:59:59	8	16	2.4	1.6	6.9	0.25			0.11		13.6637	18.5626	0.209	0.309	6.636	0.25656	41.185	8.363	0.08527			2024-04-04 02:59:59	14	22	1.7	1.8	7.4
2024-04-04 03:59:59	7	15	1.1	0.2	4.3	0.26	47.4		0.04		12.2354	22.5295	1.072	1.37	23.534	0.61466	20.337	11.629	0.06135			2024-04-04 03:59:59	6	14	1.9	1.8	8.4	0.26			0.12		12.1862	18.3566	0.33	0.848	15.413	0.39957	30.606	13.462	0.10385			2024-04-04 03:59:59	9	12	1.9	1.6	7.2
2024-04-04 04:59:59	5	18	1.7	0.2	7.3	0.33	41.8		0.06		13.3762	23.2947	0.332	1.628	24.204	0.95795	27.085	7.596	0.08296			2024-04-04 04:59:59	1	13	1.9	1.7	7.9	0.29			0.12		14.7065	22.0703	0.274	3.405	34.611	0.82866	15.433	13.53	0.13449			2024-04-04 04:59:59	3	22	1.5	1.7	14.8
2024-04-04 05:59:59	9	15	1.7	1.7	18.3	0.46	32.1		0.08		8.80033	17.6559	2.841	3.538	33.513	1.14593	16.27	7.804	0.12868			2024-04-04 05:59:59	1	11	2.2	2	12.8	0.37	34.7		0.13		10.9855	16.6633	5.147	10.642	44.595	0.99119	4.901	13.726	0.19021			2024-04-04 05:59:59	10	18	1.4	3	18.3
2024-04-04 06:59:59	7	17	1.9	4.4	21.2	0.55	27.6		0.1		4.61252	10.3985	2.343	4.895	17.644	0.64172	32.033	4.5	0.1088			2024-04-04 06:59:59	2	13	1.7	3.9	19	0.47	29.3		0.17		7.86626	12.1207	4.987	13.555	30.66	0.70912	18.426	8.933	0.20535			2024-04-04 06:59:59	11	19	1.6	2.8	13.6
2024-04-04 07:59:59	11	21	1.9	7	22.2	0.57	27.1		0.11		6.53775	20.3555	1.279	5.622	12.56	0.52302	34.086	4.141	0.09908			2024-04-04 07:59:59	9	15	1.4	5	17.8	0.51	30.7		0.19		7.41762	11.1119	2.402	8.494	18.204	0.5283	31.887	7.157	0.18462			2024-04-04 07:59:59	11	21	1.4	3.9	12.1
2024-04-04 08:59:59	10	20	1.7	4.2	12.8	0.44	37.2		0.08		9.67254	27.9032	1.033	7.219	13.343	0.47187	35.498	7.843	0.1208			2024-04-04 08:59:59	9	14	1	5	16.3	0.49	33.6		0.21		12.0135	17.8904	0.635	1.727	5.416	0.33705	53.482	8.696	0.16983			2024-04-04 08:59:59	1	23	1.2	4.4	9.9
2024-04-04 09:59:59	9	18	1.7	4.6	13.8	0.48	39.6		0.09		15.1451	33.0426	2.021	5.138	12.101	0.46685	50.28	9.742	0.1569			2024-04-04 09:59:59	5	20	1	3.5	14.6	0.51	42.3		0.22		18.3518	26.5754	1.429	1.402	4.887	0.33296	64.583	7.749	0.15582			2024-04-04 09:59:59	10	26	1.6	2.9	7.6
2024-04-04 10:59:59	11	35	2.4	7.6	23.8	0.73	48.5		0.18		19.3693	38.8158	3.083	3.159	10.104	0.45846	71.501	7.35	0.16015			2024-04-04 10:59:59	11	34	2.2	2.9	12.6	0.47	49.4		0.21		18.0449	26.3365	1.79	1.333	4.923	0.34037	71.281	7.052	0.13582			2024-04-04 10:59:59	24	26	1.9	2.9	8.4
2024-04-04 11:59:59	18	43	3.4	4.6	24.3	0.69	57.6		0.18		11.1012	25.4541	3.128	4.4	12.366	0.51717	65.845	6.106	0.17622			2024-04-04 11:59:59	18	33	2.2	2.5	10.6	0.44	56.8		0.18		15.265	22.4357	1.528	1.053	4.469	0.33437	79.614	6.844	0.12791			2024-04-04 11:59:59	35	36	2	2.6	7.3
2024-04-04 12:59:59	29	53	3.5	4.5	25.3	0.67	56		0.18		8.97138	19.7862	1.825	2.81	7.011	0.3601	59.205	4.312	0.08268			2024-04-04 12:59:59	20	37	2.1	2.1	11.5	0.43	61.3		0.18		6.57114	12.3416	1.695	0.955	3.294	0.22425	65.18	4.383	0.09153			2024-04-04 12:59:59	25	30	1.7	2.2	7
2024-04-04 13:59:59	32	53	3.2	2.8	22.1	0.62	61.5		0.16		7.31885	17.26	1.139	2.923	6.597	0.34615	51.536	3.987	0.08718			2024-04-04 13:59:59	18	45	2.2	2	13.3	0.44	63.3		0.2		4.67846	9.25059	1.255	0.982	3.128	0.21915	57.377	4.145	0.09068			2024-04-04 13:59:59	11	32	1.7	1.7	7
2024-04-04 14:59:59	29	51	2.9	3	22.7	0.56	54.3		0.17		7.54682	19.457	0.706	3.486	8.09	0.41734	48.996	4.333	0.09668			2024-04-04 14:59:59	16	42	2.3	2	13.2	0.43	61.6		0.2		4.89896	10.1915	0.868	1.041	3.54	0.25111	55.684	4.31	0.09631			2024-04-04 14:59:59	8	31	1.7	2.3	9.1
2024-04-04 15:59:59	24	42	2.3	5	20.8	0.55	36.6		0.15		7.80221	21.2215	0.565	3.291	8.996	0.43004	46.571	4.317	0.09705			2024-04-04 15:59:59	17	38	1.7	2.6	15.8	0.41	41.6		0.21		5.50095	11.8646	0.682	0.772	4.516	0.25418	52.557	4.134	0.10122			2024-04-04 15:59:59	8	36	1.4	1.4	8.4
2024-04-04 16:59:59	20	32	1.8	5.4	20.7	0.63	32.9		0.14		10.0687	26.6468	1.989	2.969	11.791	0.47877	43.646	4.702	0.11417			2024-04-04 16:59:59	15	35	0.6	1.9	12.8	0.38	40.4		0.16		7.72821	15.4032	1.624	0.627	6.363	0.27309	50.048	4.255	0.12341			2024-04-04 16:59:59	18	34	1.1	1.7	11.1
2024-04-04 17:59:59	21	39	1.8	3.9	23.1	0.7	38.2		0.14		12.1661	31.4929	3.664	2.269	17.905	0.62003	37.435	5.91	0.11919			2024-04-04 17:59:59	9	28	0.6	1.8	10.4	0.32	46.7		0.13		11.2327	20.1867	2.465	0.263	8.21	0.29224	47.616	4.267	0.11865			2024-04-04 17:59:59	10	26	0.9	2.1	11.5
2024-04-04 18:59:59	22	38	1.8	5.7	25.6	0.73	36.3		0.16		13.6175	31.67	3.752	2.42	18.994	0.68882	35.689	6.367	0.13153			2024-04-04 18:59:59	9	27	1.2	1.6	11.6	0.35	44.5		0.17		14.604	25.4637	2.962	0.284	9.413	0.30727	45.258	4.819	0.12827			2024-04-04 18:59:59	16	22	0.9	1.6	8.3
2024-04-04 19:59:59	21	35	1.9	4.7	24.8	0.66	34.7		0.15		16.4295	35.9166	3.112	2.09	18.292	0.7404	35.772	6.771	0.13034			2024-04-04 19:59:59	12	29	1.9	1.5	12.5	0.38	39.2		0.17		17.096	28.5836	2.382	0.207	8.376	0.30126	45.369	5.486	0.12062			2024-04-04 19:59:59	6	25	0.8	1.4	8.9
2024-04-04 20:59:59	19	39	3.1	4.5	27.1	0.74	27.8		0.18		16.342	40.0579	2.083	1.537	16.874	0.6679	37.701	6.926	0.12738			2024-04-04 20:59:59	15	34	2.4	1.8	18.4	0.5	31.2		0.25		17.2776	28.5768	1.423	0.149	7.214	0.29131	46.024	6.003	0.11775			2024-04-04 20:59:59	12	28	1.2	1.7	9.2
2024-04-04 21:59:59	16	45	3.6	5.5	25.8	0.75	26.1		0.2		15.2059	38.9772	1.857	0.979	14.319	0.6104	41.575	8.29	0.1299			2024-04-04 21:59:59	15	22	0.9	1.6	14.9	0.44	34.8		0.21		17.499	29.0316	1.493	0.116	6.722	0.29072	46.545	8.484	0.12131			2024-04-04 21:59:59	11	22	0.8	1.4	7.6
2024-04-04 22:59:59	24	38	3.1	2.7	22.6	0.67	30.6		0.16		16.1524	37.8223	0.64	0.429	9.912	0.51827	46.699	9.959	0.11513			2024-04-04 22:59:59	13	30	2.5	1.5	11.8	0.39	36.1		0.17		19.5551	32.2408	0.547	0.055	5.323	0.26984	46.82	9.661	0.10482			2024-04-04 22:59:59	17	32	1	1.4	8.7
2024-04-04 23:59:59	17	39	2.2	1.2	13	0.48	45.5		0.08		15.1005	31.0402	0.237	0.29	7.813	0.39104	48.579	10.183	0.08566			2024-04-04 23:59:59	17	33	5.7	1.2	11.3	0.35	37.3		0.16		20.848	34.304	0.436	0.039	5.096	0.25515	45.389	13.506	0.08927			2024-04-04 23:59:59	16	33	1.1	1.5	7.2
2024-04-05 00:59:59	20	35	1.5	1	13.3	0.43	44.5		0.07		13.9198	26.5656	0.225	0.239	5.714	0.29853	48.628	9.005	0.03237			2024-04-05 00:59:59	17	34	7.1	0.5	8.5	0.28	40.4		0.13		22.5943	36.1338	0.571	0.037	5.342	0.24396	43.162	14.341	0.06195			2024-04-05 00:59:59	13	42	1.8	0.6	7
2024-04-05 01:59:59	14	44	1.4	0.8	10.9	0.38	45.6		0.08		17.1716	31.0714	0.435	0.328	5.695	0.2939	44.439	8.64	0.01775			2024-04-05 01:59:59	16	42	5.7	0.4	9	0.26	39.6		0.07		23.0952	35.9914	0.603	0.044	5.6	0.24434	42.798	14.365	0.05715			2024-04-05 01:59:59	6	42	1.8	0.3	7.1
2024-04-05 02:59:59	21	37	1	0.4	5.8	0.27	52.7		0.05		18.7638	33.3523	0.417	0.613	8.405	0.33505	42.018	8.687	0.0233			2024-04-05 02:59:59	19	52	6.7		8.4	0.25	39		0.08		25.0475	38.2513	0.507	0.086	6.108	0.25539	42.042	15.187	0.0714			2024-04-05 02:59:59	1	42	2	0.4	6.5
2024-04-05 03:59:59	17	38	1	0.4	8	0.3	49.1		0.07		14.5015	27.228	0.398	1.537	15.14	0.494	35.906	8.428	0.0381			2024-04-05 03:59:59	20	40	2.8	0.3	6.7	0.25	40.1		0.08		26.6479	39.9627	0.415	0.194	7.931	0.30215	40.56	15.377	0.08444			2024-04-05 03:59:59	4	47	2	0.4	9.1
2024-04-05 04:59:59	18	43	1	0.7	10.2	0.4	45.6		0.08		17.3926	31.3467	0.416	3.679	24.753	0.88092	26.547	7.967	0.06578			2024-04-05 04:59:59	16	38	2		6.8	0.26	43.3		0.07		19.3568	28.5141	0.474	0.332	11.226	0.39556	38.65	15.835	0.09982			2024-04-05 04:59:59	21	50	2.2	0.9	10.4
2024-04-05 05:59:59	13	38	1.1	4.3	19.3	0.54	37.5		0.1		21.1302	36.4041	3.337	5.023	29.234	0.97031	22.688	7.937	0.09872			2024-04-05 05:59:59	17	38	2.2	0.5	9.2	0.29	39.7		0.07		11.3051	15.6482	1.767	0.449	13.397	0.3894	38.686	7.477	0.09593			2024-04-05 05:59:59	24	48	2	0.8	13.7
2024-04-05 06:59:59	17	39	1.2	4.3	19.3	0.59	35.7		0.11		21.4224	43.1698	4.169	6.557	31.221	0.92838	21.092	7.372	0.14942			2024-04-05 06:59:59	20	35	1.9	0.1	9.5	0.33	41.5		0.08		18.4527	27.0233	2.6	1.437	12.764	0.3729	42.015	8.066	0.13076			2024-04-05 06:59:59	26	37	2	1	14.8
2024-04-05 07:59:59	14	33	1.2	7.5	24	0.63	32		0.14		15.7234	25.6551	2.401	6.512	27.803	0.83809	25.75	7.63	0.16084			2024-04-05 07:59:59	17	31	1.7	0.1	11.1	0.34	39.9		0.09		20.4626	30.5758	1.609	1.78	10.127	0.35143	45.329	7.069	0.12439			2024-04-05 07:59:59	14	31	1.8	1.3	14.5
2024-04-05 08:59:59	18	42	1.5	6.9	22.5	0.64	33.3		0.14		16.6023	23.7842	0.588	6.04	13.471	0.44464	41.687	1.39	0.11598			2024-04-05 08:59:59	17	33	1.6	0.8	11.9	0.36	38.6		0.11		21.2594	31.1987	0.574	1.676	7.174	0.31084	50.382	2.514	0.08939			2024-04-05 08:59:59	25	38	2	1.1	13.5
2024-04-05 09:59:59	16	35	1.5	6.8	21.9	0.64	35.7		0.15		16.5536	23.8616	1.08	2.755	12.237	0.4052	46.366	0.501	0.10416			2024-04-05 09:59:59	20	38	2.2	1	12.8	0.41	38.5		0.13		14.4427	19.8295	1.553	1.537	9.127	0.31702	52.1	1.218	0.09604			2024-04-05 09:59:59	33	38	2.3	1.2	9.5
2024-04-05 11:00:00	23	35	1.6	5.1	17.6	0.55	47.5		0.14		17.7254	24.9779	1.666	1.842	10.944	0.37815	50.051	0.274	0.10123			2024-04-05 11:00:00	25	40	3.3	1.8	14.2	0.48	39.9		0.14		14.2845	19.41	2.391	0.646	9.107	0.32001	52.325	0.694	0.09774			2024-04-05 11:00:00	36	33	2.3	1	9.2
2024-04-05 12:00:00	18	30	1.6	3.7	16.1	0.49	52.1		0.11		19.5992	26.1708	1.315	1.485	8.66	0.37267	55.1	0.273	0.09254			2024-04-05 12:00:00	31	51	3.5	1.6	14.9	0.46	46.5		0.14		16.8974	21.9184	1.56	0.489	4.939	0.30589	59.444	0.076	0.08318			2024-04-05 12:00:00	28	26	2.3	1	8.7
2024-04-05 13:00:00	11	25	1.3	5.4	18.3	0.58	48		0.12		20.6757	26.1995	1.41	1.379	9.99	0.42439	54.554	0.782	0.07934			2024-04-05 13:00:00	29	33	2.5	0.9	10.9	0.43	52.2		0.11		17.5042	21.2731	1.331	0.839	3.63	0.32064	61.662	0.1	0.05915			2024-04-05 13:00:00	14	24	2.8	0.8	9.3
2024-04-05 14:00:00	14	30	1.2	1.7	12.6	0.45	55.2		0.08		19.664	23.7623	1.028	1.697	6.628	0.4063	62.306	0.682	0.06903			2024-04-05 14:00:00	19	16	1.6	0.8	9.2	0.4	50.7		0.09		19.8376	23.7369	1.036	0.389	3.476	0.33577	64.361	0.274	0.06333			2024-04-05 14:00:00	9	21	2.2	1.4	10.7
2024-04-05 15:00:00	14	26	1.2	2.5	16	0.46	48		0.09		16.7569	20.7734	0.553	1.658	7.639	0.43344	69.337	0.856	0.07505			2024-04-05 15:00:00	9	17	1.4	0.6	9.5	0.43	49.1		0.09		18.3346	22.1015	0.72	0.42	3.705	0.35721	71.082	0.512	0.06768			2024-04-05 15:00:00	9	21	2.9	1.4	11.6
2024-04-05 16:00:00	13	14	1.1	2.2	14.5	0.41	47.2		0.08		15.949	20.7416	0.675	1.512	10.635	0.44203	64.132	1.2	0.08892			2024-04-05 16:00:00	13	26	1.5	2.4	20.1	0.49	40.1		0.14		16.0719	20.2925	0.582	0.496	4.753	0.35629	71.549	0.67	0.07556			2024-04-05 16:00:00	9	23	3.3	1.2	12.5
2024-04-05 17:00:00	9	21	1.1	2.1	18	0.48	46.4		0.09		14.3772	18.6793	1.497	2.674	16.008	0.4943	53.691	1.847	0.11556			2024-04-05 17:00:00	17	16	1.7	1.4	18	0.46	43.2		0.11		16.7618	21.2234	1.43	0.668	7.271	0.38727	70.089	1.563	0.10599			2024-04-05 17:00:00	5	20	2.5	0.9	11.7
2024-04-05 18:00:00	12	19	1.4	1.9	21.7	0.53	43		0.1		13.0443	17.2654	2.377	1.662	22.305	0.53041	40.688	1.982	0.10961			2024-04-05 18:00:00	14	17	2.3	0.8	21.5	0.49	38.7		0.12		16.8045	21.1743	2.757	0.112	13.048	0.46716	57.709	3.351	0.14912			2024-04-05 18:00:00	3	25	2.9	1.3	21.7
2024-04-05 19:00:00	19	16	1.2	1.8	22.2	0.51	44.2		0.1		11.538	16.2102	2.701	1.807	22.202	0.56563	39.276	2.261	0.11165			2024-04-05 19:00:00	11	15	1.1	1	19.1	0.47	42.3		0.1		14.9617	18.8049	3.2	0.121	12.003	0.45518	53.648	3.159	0.13734			2024-04-05 19:00:00	9	25	2.7	1	18
2024-04-05 20:00:00	11	22	1.5	1.1	22.3	0.47	42		0.09		10.4823	14.9263	2.87	1.416	19.164	0.55297	41.003	2.344	0.10093			2024-04-05 20:00:00	9	11	1.2	0.8	20.9	0.49	39.7		0.11		13.2766	17.115	2.902	0.09	9.914	0.4293	53.122	2.825	0.1115			2024-04-05 20:00:00	8	23	3	1	17
2024-04-05 21:00:00	12	18	2.2	1.3	21.6	0.51	40.2		0.1		11.1327	15.6404	2.292	1.157	16.697	0.51698	42.154	2.485	0.09803			2024-04-05 21:00:00	9	15	1.1	0.9	21.3	0.54	37.7		0.13		13.093	16.9966	2.157	0.083	9.074	0.41445	50.629	3.11	0.10988			2024-04-05 21:00:00	14	18	2.1	0.7	14.3
2024-04-05 22:00:00	5	19	1.7	1.3	19.1	0.51	41.3		0.09		10.8092	14.8522	2.268	0.905	14.487	0.47945	42.061	2.521	0.09577			2024-04-05 22:00:00	5	11	0.8	0.6	20.2	0.52	36.9		0.12		12.5452	17.033	1.658	0.075	9.359	0.41274	46.958	3.851	0.11538			2024-04-05 22:00:00	8	16	2.4	0.9	14.4
2024-04-05 23:00:00	12	19	1.7	0.8	17.9	0.48	39		0.1		9.76478	13.4127	1.429	0.45	10.082	0.43958	45.529	2.868	0.08089			2024-04-05 23:00:00	3	12	0.7	0.4	15.9	0.48	36.4		0.11		11.8296	16.322	0.919	0.034	6.933	0.36594	48.563	3.726	0.09286			2024-04-05 23:00:00	8	19	2.6	0.7	15.1
2024-04-06	4	20	3.1	0.9	16.9	0.46	34.7		0.1		9.17192	14.0951	1.277	0.204	5.534	0.30923	48.13	2.913	0.04802			2024-04-06	8	11	1.7	0.3	13.8	0.47	35.2		0.12		11.722	16.2671	0.671	0.016	4.277	0.30213	50.543	4.01	0.06328			2024-04-06		12	2.3	0.8	14.7
2024-04-06 01:00:00	2	16	3.3	0.7	14.3	0.42	34.6		0.11		9.69309	15.9229	1.2	0.25	6.55	0.30469	46.093	4.703	0.03538			2024-04-06 01:00:00	7	13	1.2	0.7	13.1	0.41	31.8		0.14		13.5755	18.3838	0.267	0.019	3.136	0.27188	50.004	4.167	0.04486			2024-04-06 01:00:00	1	18	1.7	1.1	10.8
2024-04-06 02:00:00		20	4	0.3	13.1	0.36	34.7		0.09		9.8751	16.1151	0.863	0.338	8.279	0.32135	43.768	5.663	0.03571			2024-04-06 02:00:00	5	12	1.4	0.6	11.2	0.36	31.8		0.13		14.1717	19.2201	0.172	0.028	3.726	0.28027	47.382	6.446	0.05026			2024-04-06 02:00:00	1	24	2.1	0.8	9.6
2024-04-06 03:00:00	3	16	3.5	0.3	12.5	0.37	32.9		0.11		10.2925	16.9105	0.931	0.651	12.829	0.37332	39.368	6.057	0.0427			2024-04-06 03:00:00	2	13	1.5	0.8	10.6	0.33	32.2		0.13		13.9718	18.7289	0.192	0.047	5.165	0.30443	45.168	8.145	0.06559			2024-04-06 03:00:00	1	22	2.6	1	9.3
2024-04-06 04:00:00	1	17	2.7	0.5	13.1	0.4	32		0.13		11.1633	18.4927	0.807	1.877	26.102	0.57517	26.735	7.362	0.06726			2024-04-06 04:00:00	1	10	1.7	0.5	8.7	0.32	31.8		0.13		14.6841	19.4714	0.183	0.099	8.308	0.38046	42.737	9.224	0.08394			2024-04-06 04:00:00		11	1.5	1	7.7
2024-04-06 05:00:00	7	20	2.5	4.1	23.6	0.59	14.6		0.17		12.2766	20.2514	0.703	8.924	46.433	0.94347	7.444	9.227	0.11061			2024-04-06 05:00:00	4	15	1.5	0.8	14.6	0.43	17.9		0.23		16.1468	21.0406	0.22	0.195	16.051	0.56056	37.56	12.179	0.12254			2024-04-06 05:00:00		21	1.4	1	8.2
2024-04-06 06:00:00	2	27	2.9	19.3	30.3	0.82	8.8		0.23		13.2178	21.1445	3.577	29.492	54.187	1.25616	0.691	11.305	0.19248			2024-04-06 06:00:00	4	19	1.6	3.4	18.3	0.51	10.4		0.24		17.5639	22.0724	3.66	0.38	24.793	0.6959	29.439	14.213	0.17593			2024-04-06 06:00:00	6	26	1.7	3.1	16.2
2024-04-06 07:00:00	9	24	3.5	21	31.4	0.96	13.1		0.26		12.4978	19.7491	3.708	20.916	39.565	0.95705	14.86	7.598	0.20229			2024-04-06 07:00:00	3	13	2.3	7	16.8	0.53	13.4		0.17		17.3588	21.4452	3.639	3.608	18.241	0.5992	36.538	9.118	0.18526			2024-04-06 07:00:00	14	30	1.6	8.7	17.5
2024-04-06 08:00:00	4	25	4	14.7	29.4	0.84	24.3		0.22		12.6638	22.0356	2.332	11.315	24.759	0.69158	32.024	5.173	0.16518			2024-04-06 08:00:00	4	27	2.1	7.1	17.7	0.58	21.3		0.18		16.8447	22.7142	2.33	4.04	13.218	0.53932	44.925	6.871	0.17643			2024-04-06 08:00:00	14	27	2.7	8.3	18.3
2024-04-06 09:00:00	12	29	3.3	9.5	29.4	0.78	35.2		0.2		14.8728	24.0518	1.645	10.69	22.415	0.80492	39.459	5.34	0.17657			2024-04-06 09:00:00	8	31	2.4	6.1	22.1	0.67	35		0.21		12.8626	18.7463	1.463	6.114	15.852	0.68855	48.801	5.748	0.19293			2024-04-06 09:00:00	13	24	4.1	4.2	13.9
2024-04-06 10:00:00	14	30	2.9	3	19.9	0.63	56.8		0.14		14.9703	22.5657	2.505	7.45	18.747	0.66424	52.362	3.972	0.1581			2024-04-06 10:00:00	13	30	3.6	2.9	16.6	0.6	53		0.16		12.7522	17.7671	1.579	2.887	8.905	0.46295	66.419	3.037	0.10894			2024-04-06 10:00:00	17	26	3.1	2.7	10.4
2024-04-06 11:00:00	16	36	3.3	5.2	25.8	0.75	61.3		0.16		16.2665	23.2563	3.264	3.079	10.483	0.48921	75.521	3.289	0.11685			2024-04-06 11:00:00	15	38	3.5	1.5	14.8	0.51	59.1		0.14		16.2593	22.1881	2.515	2.2	7.787	0.4449	78.451	3.681	0.11287			2024-04-06 11:00:00	26	32	3.9	1.8	10.2
2024-04-06 12:00:00	19	30	2.8	3.3	16.5	0.53	61.7		0.11		14.5303	20.8426	3.144	2.055	10.538	0.49875	78.333	2.609	0.11669			2024-04-06 12:00:00	16	43	3.8	1.3	13.1	0.48	60.8		0.11		17.6234	23.6356	3.118	1.664	7.181	0.4392	94.018	3.388	0.12153			2024-04-06 12:00:00	18	26	2.4	1.3	7.5
2024-04-06 13:00:00	13	26	2.7	3.5	20.3	0.6	50.9		0.11		13.6942	18.9101	2.29	1.455	5.63	0.40146	86.81	1.805	0.07118			2024-04-06 13:00:00	16	33	4	0.9	14.8	0.48	59.1		0.11		19.1573	25.5536	3.139	1.342	6.308	0.41323	98.134	3.015	0.09603			2024-04-06 13:00:00	14	26	2.6	1.1	6.8
2024-04-06 14:00:00	17	31	3.1	5.2	26.2	0.73	44.3		0.14		13.9305	20.0571	1.601	1.73	6.264	0.41048	79.519	1.8	0.07504			2024-04-06 14:00:00	15	26	4.5	1.4	16.4	0.51	52.5		0.13		17.9832	24.7664	2.229	1.435	6.377	0.40667	89.082	2.581	0.09376			2024-04-06 14:00:00	5	21	2.5	1.4	6.8
2024-04-06 15:00:00	11	36	3.2	5	27.1	0.72	45.5		0.17		14.568	23.2023	1.013	1.009	10.47	0.47075	69.25	2.028	0.09039			2024-04-06 15:00:00	18	43	3.6	1	13.4	0.47	56.3		0.11		19.2916	27.6992	1.063	1.135	9.673	0.42901	73.896	1.77	0.10094			2024-04-06 15:00:00	14	32	2.8	1.2	6.9
2024-04-06 16:00:00	19	63	2.5	4.8	25.5	0.73	54.4		0.17		16.4072	26.6396	0.962	1.08	13.72	0.52794	63.197	1.999	0.10406			2024-04-06 16:00:00	27	59	3.7	0.7	14.3	0.49	55.5		0.11		21.7217	31.0664	0.813	0.696	12.114	0.46843	71.446	2.143	0.11672			2024-04-06 16:00:00	12	20	2.3	0.8	8.1
2024-04-06 17:00:00	27	75	2.9	5.7	33.2	0.99	47.6		0.22		21.6569	34.9934	2.089	2.346	18.24	0.62051	61.141	2.349	0.13072			2024-04-06 17:00:00	38	69	2.7	0.7	18.6	0.61	52.4		0.17		21.6524	31.0775	2.195	1.694	15.191	0.52597	69.989	2.846	0.1385			2024-04-06 17:00:00	22	46	2.2	1.3	12.9
2024-04-06 18:00:00	36	80	3.5	4.5	38.6	1.1	37.7		0.28		27.3535	45.1991	3.996	1.623	31.49	0.8537	51.511	3.434	0.16482			2024-04-06 18:00:00	45	71	3.4	0.9	21.2	0.66	47.5		0.18		23.143	33.8287	3.938	1.125	23.229	0.61194	59.302	3.707	0.15643			2024-04-06 18:00:00	26	54	2.1	1.2	15.7
2024-04-06 19:00:00	37	74	3.6	1.9	34.4	0.94	38.7		0.25		32.3272	55.0849	6.113	2.545	43.055	1.10703	37.953	5.241	0.20461			2024-04-06 19:00:00	38	60	3.1	0.8	20.2	0.65	46.4		0.16		28.3254	42.0374	4.658	1.4	26.98	0.69895	52.425	5.022	0.18967			2024-04-06 19:00:00	32	42	2	1	15.5
2024-04-06 20:00:00	37	65	3.5	1	32.8	0.92	36.1		0.24		36.4776	65.9157	5.832	2.369	42.253	1.19057	37.002	5.786	0.21002			2024-04-06 20:00:00	33	59	2.7	1.3	34.8	0.95	30.2		0.29		33.0264	50.5817	4.999	1.361	30.905	0.88435	47.072	6.519	0.24883			2024-04-06 20:00:00	29	58	1.7	1.3	18.1
2024-04-06 21:00:00	42	70	3	1	44.3	1.07	16.1		0.32		24.5502	49.2469	5.011	2.722	45.722	1.29093	27.005	6.199	0.24788			2024-04-06 21:00:00	34	67	3.3	2.2	41.5	1.11	19.8		0.37		28.5528	44.3444	3.639	1.261	32.583	0.969	42.962	8.66	0.27668			2024-04-06 21:00:00	36	65	1.6	1.1	19.1
2024-04-06 22:00:00	49	64	2.9	1	32	0.85	27.8		0.22		11.7093	29.2843	2.9	2.55	32.416	0.94703	25.199	8.1	0.18576			2024-04-06 22:00:00	30	51	2.7	2	30.6	0.91	18.1		0.27		17.4932	29.127	2.924	1.331	29.418	0.87193	37.808	10.604	0.26783			2024-04-06 22:00:00	44	60	1.5	1.3	16.5
2024-04-06 23:00:00	43	59	2.7	0.9	25.6	0.75	29.1		0.19		12.535	30.3943	1.198	1.567	26.562	0.9246	26.587	9.727	0.16449			2024-04-06 23:00:00	28	58	4.2	8.5	38.4	1.3	7.7		0.46		15.6075	25.6042	1.062	0.537	18.574	0.66259	41.422	9.636	0.18602			2024-04-06 23:00:00	49	72	1.8	1.6	34.4
2024-04-07	33	51	2	2.9	34.3	1.02	14.2		0.27		15.1527	34.2462	0.667	0.69	24.578	0.89126	27.12	13.481	0.16358			2024-04-07	33	67	2.7	14.6	41.9	1.54	2.8		0.63		19.9083	33.024	0.816	0.255	16.158	0.61413	41.627	11.811	0.17622			2024-04-07	46	78	3	1.6	17
2024-04-07 01:00:00	21	42	1.4	2.7	21.6	0.76	12.1		0.21		17.5896	34.9818	0.524	0.646	25.489	0.91078	25.374	16.039	0.14251			2024-04-07 01:00:00	37	52	2.6	3.9	31.2	1.01	4.6		0.4		25.6229	41.1005	1.195	0.229	18.896	0.688	37.283	13.491	0.17863			2024-04-07 01:00:00	50	91	3.2	0.5	14.7
2024-04-07 02:00:00	19	49	1.8	2.8	27.6	0.89	6.3		0.31		17.9296	31.865	0.316	0.562	22.449	0.76462	28.432	15.529	0.11539			2024-04-07 02:00:00	36	58	1.9	9.2	30.4	1.02	2.6		0.4		29.4545	46.1017	1.461	0.271	19.821	0.73649	34.176	13.245	0.17941			2024-04-07 02:00:00	63	76	2.4	0.2	11.9
2024-04-07 03:00:00	25	47	1.8	2.4	17.5	0.66	14		0.22		19.9546	32.7739	0.292	0.874	22.156	0.67083	29.081	14.575	0.10663			2024-04-07 03:00:00	32	53	2	4.3	28.7	0.95	3.1		0.42		32.9631	51.1541	1.413	0.626	23.496	0.83288	28.779	14.432	0.19683			2024-04-07 03:00:00	51	73	2.3	0.7	10.6
2024-04-07 04:00:00	26	41	1.6	1.7	10.9	0.51	17.9		0.13		21.891	34.4276	0.351	1.824	28.644	0.7772	22.742	13.803	0.11977			2024-04-07 04:00:00	29	52	1.7	2.5	22.2	0.79	5.1		0.35		35.9179	55.4458	1.613	1.621	32.409	1.0179	18.704	15.063	0.22561			2024-04-07 04:00:00	51	78	2.9	0.2	10.9
2024-04-07 05:00:00	21	41	1.4	2.1	8.3	0.47	17.6		0.12		22.3145	34.5167	0.381	3.923	35.704	0.90563	15.57	11.866	0.13641			2024-04-07 05:00:00	28	49	1.6	4.3	21.9	0.77	3.9		0.33		37.9142	57.5425	1.489	4.881	42.657	1.23438	7.813	16.021	0.24509			2024-04-07 05:00:00	38	65	2.5	0.5	9.1
2024-04-07 06:00:00	20	32	1.2	5.7	12.7	0.57	14.3		0.14		23.8678	36.2194	3.534	4.606	37.185	0.86607	15.864	9.162	0.15438			2024-04-07 06:00:00	33	58	2.2	5.1	22.5	0.82	7.1		0.32		38.1853	57.1112	5.372	17.28	49.466	1.44662	1.082	15.414	0.27822			2024-04-07 06:00:00	49	72	2.3	0.4	9.6
2024-04-07 07:00:00	17	30	1.1	3.7	13.8	0.52	14.8		0.13		27.425	42.4549	4.704	10.032	32.246	0.88392	24.985	7.289	0.17799			2024-04-07 07:00:00	33	39	1.5	10	23	0.88	7.3		0.32		35.8159	53.4402	5.241	13.836	37.099	1.16475	19.314	7.847	0.25336			2024-04-07 07:00:00	44	61	2.9	0.6	10.4
2024-04-07 08:00:00	21	45	1.7	14	24.2	0.84	12.9		0.23		30.653	49.1872	3.607	10.419	27.496	0.92189	36.999	6.206	0.17553			2024-04-07 08:00:00	30	53	0.8	7.8	25.4	0.96	14.6		0.34		36.7839	62.5404	3.683	9.309	26.465	0.99625	38.886	5.943	0.22555			2024-04-07 08:00:00	42	59	3.4	0.7	11.9
2024-04-07 09:00:00	26	70	3.7	9.2	27.6	0.88	35.6		0.21		33.877	55.3593	2.017	5.963	18.194	0.77784	53.999	5.794	0.17444			2024-04-07 09:00:00	35	71	1.5	3.8	21.4	0.85	37.2		0.26		34.8651	62.0004	1.515	4.489	14.555	0.77123	58.917	5.683	0.19251			2024-04-07 09:00:00	45	52	2.7	0.7	9
2024-04-07 10:00:00	41	79	3.1	9.8	28	0.94	45		0.22		35.6269	58.2873	2.594	3.299	11.314	0.60092	70.781	5.447	0.14251			2024-04-07 10:00:00	41	62	0.3	2.2	10.8	0.53	55.4		0.12		36.6052	64.7631	1.374	2.512	8.53	0.55656	73.581	5.594	0.13632			2024-04-07 10:00:00	37	52	2.7	0.2	7.2
2024-04-07 11:00:00	48	72	3.3	5.8	24.1	0.83	62.1		0.2		38.8232	62.4922	3.269	2.281	8.768	0.52425	81.753	5.05	0.12658			2024-04-07 11:00:00	40	59	0.1	1.8	9.2	0.47	64.9		0.1		37.3447	64.9119	1.506	1.858	7.031	0.50801	83.874	5.401	0.12411			2024-04-07 11:00:00	35	48	3	0.1	7.2
2024-04-07 12:00:00	40	61	2.3	4.4	21	0.72	72.3		0.16		34.5928	52.7286	2.884	1.086	5.122	0.47587	95.431	4.697	0.10863			2024-04-07 12:00:00	33	56		1.4	8	0.44	73.2		0.1		39.6719	68.3726	1.582	1.078	4.884	0.47895	94.279	5.362	0.1176			2024-04-07 12:00:00	33	48	2.8	0.5	6.3
2024-04-07 13:00:00	36	53	2.3	5.1	21.8	0.74	66.7		0.16		29.715	41.9427	1.96	0.502	3.779	0.38896	85.247	3.808	0.0612			2024-04-07 13:00:00	29	51		1.3	8.4	0.43	71		0.08		39.5391	59.9255	1.841	0.873	4.41	0.46467	98.752	5.268	0.10178			2024-04-07 13:00:00	29	48	3	0.8	6.3
2024-04-07 14:00:00	29	52	2.2	6.2	22.5	0.74	63.1		0.14		28.8693	39.8157	1.46	0.856	3.72	0.38448	85.098	3.704	0.06654			2024-04-07 14:00:00	26	47		1.6	8.3	0.43	69.9		0.08		33.9891	48.9005	1.321	0.877	3.881	0.41221	88.116	4.48	0.08806			2024-04-07 14:00:00	33	57	2.6	0.7	6.8
2024-04-07 15:00:00	33	64	2	6.3	28	0.85	60.9		0.17		20.1733	28.1711	0.904	1.03	4.607	0.37676	78.45	2.958	0.06683			2024-04-07 15:00:00	30	57		1.5	7.7	0.43	72.8		0.08		22.8881	35.9715	0.802	0.948	4.108	0.38838	78.872	3.037	0.08014			2024-04-07 15:00:00	24	55	2.3	0.6	6.8
2024-04-07 16:00:00	32	77	2.4	3.3	20.1	0.63	63.8		0.13		18.2249	26.9559	0.631	1.022	5.788	0.36921	66.831	2.273	0.06885			2024-04-07 16:00:00	36	65		1.6	10.5	0.51	68.6		0.12		19.0042	33.1881	0.409	1.109	5.003	0.36407	66.713	2.045	0.08106			2024-04-07 16:00:00	32	58	2.6	0.1	9
2024-04-07 17:00:00	42	72	2.5	3.9	30	0.83	51.4		0.18		20.6101	31.6323	1.505	1.314	8.574	0.42779	60.172	2.379	0.09011			2024-04-07 17:00:00	40	65		1.5	15.7	0.63	61.5		0.16		22.0525	41.1804	0.645	1.608	9.905	0.41177	59.999	2.175	0.10618			2024-04-07 17:00:00	29	63	2.7	0.6	10.1
2024-04-07 18:00:00	40	68	2.3	3.8	25.8	0.79	55		0.19		24.1367	42.8295	2.621	0.885	13.522	0.51115	53.36	3.129	0.10276			2024-04-07 18:00:00	39	67	0.3	1.4	18.7	0.75	55.5		0.2		25.8368	56.0434	1.044	1.229	15.541	0.4692	52.01	2.73	0.11396			2024-04-07 18:00:00	40	62	3.6	0.3	13.8
2024-04-07 19:00:00	35	74	2.5	4.2	29.6	0.87	48.9		0.2		26.1288	52.1984	3.829	1.065	19.429	0.62137	46.73	4.302	0.1333			2024-04-07 19:00:00	41	66		1.5	21.1	0.85	49.9		0.23		29.0074	66.7451	0.973	1.513	18.967	0.55098	46.823	3.924	0.14628			2024-04-07 19:00:00	37	57	2.8	0.6	17.8
2024-04-07 20:00:00	36	84	3.4	4.5	31.2	0.91	46.5		0.21		28.814	59.9467	4.003	0.994	23.795	0.75006	41.294	6.232	0.16388			2024-04-07 20:00:00	45	67	0.3	1.3	19	0.79	51.4		0.21		30.9827	69.903	1.126	1.199	22.445	0.66673	41.479	6.255	0.1776			2024-04-07 20:00:00	41	52	2.3	0.4	12.2
2024-04-07 21:00:00	37	70	2.7	3.3	24.6	0.83	54.5		0.16		30.7906	62.6764	3.443	0.917	23.885	0.82655	38.53	7.182	0.18213			2024-04-07 21:00:00	43	76	0.3	1.4	22.5	0.86	44.9		0.23		35.5834	83.2887	0.873	1.065	23.211	0.72565	40.74	6.18	0.20501			2024-04-07 21:00:00	37	61	2.1		11.9
2024-04-07 22:00:00	44	72	2.5	3.1	21.4	0.79	58.1		0.15		35.1759	72.154	3.473	0.941	24.194	0.88458	36.217	8.629	0.19966			2024-04-07 22:00:00	38	79	2.6	1.2	24.4	0.84	38.3		0.23		42.2979	99.0967	1.296	1.379	30.664	0.92949	30.667	9.673	0.25739			2024-04-07 22:00:00	37	62	2.3	0.4	13.5
2024-04-07 23:00:00	34	74	2.3	2.7	27.6	0.9	46.2		0.19		38.3066	77.9728	2.768	0.816	29.378	1.03751	28.885	12.71	0.23138			2024-04-07 23:00:00	38	86	1.2	2	37.9	1.24	20		0.42		40.1983	90.4338	1.179	0.84	28.973	0.98692	29.332	11.255	0.26997			2024-04-07 23:00:00	32	63	2.4	0.6	13
2024-04-08	36	60	2.3	3.2	23.9	0.79	37.5		0.16		34.6686	69.2274	2.225	0.141	20.633	0.86206	33.185	14.9	0.20036			2024-04-08	45	81	5.7	1.6	34.1	1.12	14.7		0.45		29.6174	65.2808	0.959	0.12	18.612	0.74264	37.035	12.508	0.20633			2024-04-08	36	54	2.3	1.2	13
2024-04-08 01:00:00	30	59	2.3	1.5	29.4	0.8	17.5		0.22		33.5382	68.0517	1.641	0.113	13.706	0.67897	38.825	18.263	0.14708			2024-04-08 01:00:00	44	67	2.3	0.6	23.9	0.83	13.6		0.33		25.7864	50.2323	0.583	0.098	10.34	0.49944	42.961	17.567	0.14139			2024-04-08 01:00:00	41	82	4.2	1.1	17.4
2024-04-08 02:00:00	35	66	2.4	2.4	29.5	0.82	6.6		0.29		33.8184	68.2605	1.283	0.16	13.614	0.64992	37.576	22.406	0.13279			2024-04-08 02:00:00	39	62	2	1	22.9	0.84	12		0.36		25.8985	47.7179	0.489	0.173	9.113	0.46527	40.611	19.428	0.13239			2024-04-08 02:00:00	42	79	3.9	1.6	18.3
2024-04-08 03:00:00	23	62	2.6	2.7	22.5	0.68	12.7		0.25		32.2488	63.9596	1.021	0.403	16.629	0.65392	33.306	23.181	0.12654			2024-04-08 03:00:00	44	77	3.3	0.7	25.1	0.86	8.2		0.43		23.5159	41.7338	0.41	0.399	10.481	0.46205	37.597	19.483	0.13644			2024-04-08 03:00:00	53	76	2.3	1.7	11.8
2024-04-08 04:00:00	19	47	2.1	1.1	10.9	0.47	19.8		0.14		33.4509	64.8004	0.804	1.702	27.713	0.81468	21.524	23.854	0.13588			2024-04-08 04:00:00	44	71	3.3	1.5	21.5	0.76	5.1		0.38		25.2722	44.1036	0.332	1.232	18.408	0.62767	29.713	17.885	0.14529			2024-04-08 04:00:00	44	70	1.6	1.2	10.1
2024-04-08 05:00:00	17	52	1.9	1.5	11	0.51	11.8		0.18		36.6887	69.7719	0.767	11.729	46.429	1.40752	2.951	26.181	0.18969			2024-04-08 05:00:00	37	57	2.3	1.3	17.4	0.64	7.4		0.27		31.4033	54.1331	0.255	4.024	35.026	1.07303	14.37	18.364	0.17236			2024-04-08 05:00:00	37	70	1.9	1.3	15.4
2024-04-08 06:00:00	20	45	2	5.2	14.6	0.58	10.8		0.17		37.3882	65.9769	3.447	29.568	50.47	1.78585	0.073	24.365	0.2422			2024-04-08 06:00:00	33	58	2.5	5.3	18.4	0.67	7.7		0.26		36.7112	61.8628	0.366	16.468	49.016	1.46881	1.648	19.205	0.22834			2024-04-08 06:00:00	32	66	3.9	3.3	20.8
2024-04-08 07:00:00	18	48	2.3	8	17.9	0.67	14.3		0.19		35.9723	59.0801	4.359	31.305	42.824	1.5483	9.261	17.832	0.24575			2024-04-08 07:00:00	31	61	2.2	10.9	24.2	0.92	10.7		0.29		35.71	60.531	0.658	18.461	37.65	1.20249	15.057	13.245	0.24294			2024-04-08 07:00:00	37	62	1.9	9.8	25.9
2024-04-08 08:00:00	25	73	3.4	31.6	36.4	1.92	16.2		0.42		35.4197	57.7932	3.296	24.996	36.484	1.25412	18.998	13.689	0.22821			2024-04-08 08:00:00	37	63	2.3	11.9	33.2	1.23	22.4		0.36		35.1418	58.8986	0.62	9.836	24.811	0.8595	34.755	7.458	0.20964			2024-04-08 08:00:00	52	62	3.3	3.8	19.1
2024-04-08 09:00:00	35	72	4.7	19.4	45.1	1.49	30.7		0.37		35.4426	56.5314	2.636	12.609	26.426	0.95755	35.67	10.595	0.22162			2024-04-08 09:00:00	44	69	2.5	3.4	23.7	1.01	51.2		0.28		40.5925	66.7799	0.813	4.832	15.612	0.69537	55.313	5.762	0.24567			2024-04-08 09:00:00	51	58	4.2	3.9	19.7
2024-04-08 10:00:00	43	71	4.1	7.7	33.1	0.85	55.9		0.22		41.1985	62.7531	3.119	6.456	17.718	0.72569	53.027	7.914	0.19024			2024-04-08 10:00:00	45	62	0.3	2.3	22.3	0.86	71.3		0.23		48.3922	81.0229	1.298	3.417	12.573	0.62127	69.852	4.929	0.22917			2024-04-08 10:00:00	45	58	4.9	2.7	14.7
2024-04-08 11:00:00	35	67	4.2	5.3	29.4	0.78	72.3		0.24		49.1031	69.5059	3.553	2.29	8.861	0.52319	75.479	5.807	0.15446			2024-04-08 11:00:00	40	63	0.2	1.6	21.3	0.75	81.6		0.25		53.2034	83.5512	1.704	2.403	10.238	0.5652	82.428	4.155	0.20725			2024-04-08 11:00:00	51	60	4.5	2	13.1
2024-04-08 12:00:00	36	70	5.1	4.7	29.3	0.83	82.5		0.22		43.9142	59.6692	3.527	0.754	7.573	0.54075	86.825	4.067	0.15045			2024-04-08 12:00:00	40	74	1.9	1.2	20.3	0.69	90.1		0.21		62.227	87.6251	2.541	2.09	9.988	0.58905	91.427	3.514	0.20583			2024-04-08 12:00:00	41	56	4.5	1.6	12.6
2024-04-08 13:00:00	40	73	4.9	4.2	29.6	0.93	80.2		0.22		18.9381	28.6285	3.792	0.256	4.719	0.37222	69.034	2.734	0.09123			2024-04-08 13:00:00	46	71	2.1	1.3		0.61	89.9		0.15		43.4406	61.8313	2.465	0.209	9.654	0.48265	80.992	2.899	0.14918			2024-04-08 13:00:00	49	59	4.3	1.8	10.1
2024-04-08 14:00:00	44	75	5	2.9	22	0.7	85.1		0.18		25.4136	40.0321	2.938	0.58	6.293	0.38889	62.345	3.346	0.12406			2024-04-08 14:00:00	45	68	1.8			0.58	81.7		0.16		23.0346	37.9946	1.631	0.632	10.643	0.45437	65.279	2.187	0.18769			2024-04-08 14:00:00	43	51	3.4	1.7	9.4
2024-04-08 15:00:00	49	66	4.7	3.9	24.6	0.72	74.5		0.18		32.6767	51.4781	1.957	0.268	9.953	0.4623	60.365	3.99	0.14214			2024-04-08 15:00:00	45	64	1.6			0.56	76.3		0.17		28.7402	56.0555	0.785	0.55	11.198	0.45812	60.141	3.132	0.21582			2024-04-08 15:00:00	42	65	3.4	1.6	14.3
2024-04-08 16:00:00	47	70	4.5	7.2	37	0.93	57.8		0.25		30.8266	51.8521	1.584	1.596	10.504	0.5574	58.677	4.754	0.16995			2024-04-08 16:00:00	42	66	1.2			0.63	61.1		0.23		40.0568	71.951	0.869	1.092	15.715	0.59747	59.83	3.952	0.23608			2024-04-08 16:00:00	48	65	4.8	1.8	17.4
2024-04-08 17:00:00	54	72	4.8	10.4	46.9	1.36	44.5		0.35		22.7898	42.3738	4.785	1.579	12.634	0.53528	50.229	5.292	0.16729			2024-04-08 17:00:00	37	70	1.7			0.78	53		0.31		39.7431	81.1074	1.778	2.075	19.732	0.61561	55.503	3.942	0.25237			2024-04-08 17:00:00	59	78	5.6	2.4	23.3
2024-04-08 18:00:00	41	72	5.5	18.8	61.9	1.83	25.7		0.49		18.88	39.372	6.302	0.604	14.624	0.56712	38.646	5.566	0.15804			2024-04-08 18:00:00	41	80	4.3			1.11	34.2		0.66		35.9246	85.0789	2.881	0.759	28.059	0.70246	43.092	5.803	0.29469			2024-04-08 18:00:00	63	86	4.6	1.5	22.9
2024-04-08 19:00:00	43	84	5.9	20.8	63.4	1.73	17.5		0.5		19.3632	41.2273	7.281	0.898	18.269	0.68599	31.096	6.613	0.18493			2024-04-08 19:00:00	47	79	9.6			1.05	23.2		0.72		37.3249	87.5667	3.342	1.188	34.837	0.85255	32.2	7.05	0.35478			2024-04-08 19:00:00	60	70	3.2	1.4	16.1
2024-04-08 20:00:00	36	76	5.7	19.2	59.7	1.57	14.4		0.43		19.9688	44.3221	6.18	0.902	19.129	0.7853	26.574	7.67	0.20126			2024-04-08 20:00:00	51	125	24.3			1.16	18.7		0.69		31.4736	69.1475	3.299	1.132	34.487	0.97027	27.986	9.519	0.41414			2024-04-08 20:00:00	51	75	3.4	1.4	19.8
2024-04-08 21:00:00	41	71	5.5	23.9	55.2	1.61	4.9		0.46		24.0992	56.5124	5.896	1.155	24.067	1.01759	19.526	11.779	0.27875			2024-04-08 21:00:00	52	118	16.7			1.51	6.1		0.93		33.7954	71.5018	2.793	0.965	29.498	0.8809	26.33	12.075	0.40186			2024-04-08 21:00:00	56	72	4.1	1.3	22.8
2024-04-08 22:00:00	31	42	4.3	34	36.6	1.18	1.1		0.35		26.8928	62.698	6.282	1.131	26.667	1.02131	14.37	15.371	0.29172			2024-04-08 22:00:00	55	117	10			1.68	2.2		1.05		40.4652	81.9824	3.35	0.828	28.628	0.83069	22.189	14.724	0.39612			2024-04-08 22:00:00	46	70	3.5	4.3	41.4
2024-04-08 23:00:00	30	55	4.7	17	39.6	1.08	1.5		0.38		28.2665	62.6705	3.796	0.634	26.385	1.10166	13.663	26.977	0.3564			2024-04-08 23:00:00	59	105	5.4			1.26	2.9		0.74		48.7077	94.7564	3.422	0.387	26.922	0.82616	20.568	17.432	0.42509			2024-04-08 23:00:00	50	78	5.3	2.9	35.9
2024-04-09	24	32	1.7	4.8	26	0.6	6.5		0.19		26.5297	52.2997	1.124	0.141	13.705	0.59933	25.314	18.883	0.19346			2024-04-09	49	77	4.3			0.81	7.4		0.4		53.9556	101.134	3.197	0.169	21.516	0.73553	23.892	16.597	0.33252			2024-04-09	43	71	5.8	1.8	26.6
2024-04-09 01:00:00	29	57	3.6	17.2	39.3	1.36	3.6		0.41		34.2319	65.5705	0.972	0.132	13.335	0.56903	26.575	21.515	0.17432			2024-04-09 01:00:00	42	75	2.9			0.65	8		0.39		59.0024	109.054	3.062	0.184	20.058	0.7383	26.053	19.499	0.26303			2024-04-09 01:00:00	52	75	5	1.2	27.7
2024-04-09 02:00:00	29	68	4.4	4.6	33.7	0.9	3.6		0.33		40.613	75.9513	1.087	0.189	15.691	0.65164	23.271	26.45	0.18976			2024-04-09 02:00:00	38	66	3			0.59	7.6		0.35		59.4524	107.611	2.191	0.242	21.712	0.77644	23.57	24.493	0.25187			2024-04-09 02:00:00	52	78	5.5	2.3	30.2
2024-04-09 03:00:00	31	72	4.2	1.7	24	0.64	8.5		0.32		46.6227	84.4711	1.047	0.526	20.158	0.76969	18.502	32.815	0.20363			2024-04-09 03:00:00	36	66	4.6			0.55	9.9		0.3		62.7596	110.666	1.758	0.638	28.452	0.90524	18.578	28.639	0.29667			2024-04-09 03:00:00	52	57	5	1.3	19.7
2024-04-09 04:00:00	28	46	2.3	0.8	12.5	0.42	12.9		0.19		52.2849	88.8267	0.86	1.741	28.574	0.97829	10.807	33.514	0.21086			2024-04-09 04:00:00	37	66	4.4			0.58	8.8		0.33		52.541	83.3768	1.099	1.598	35.03	1.02991	13.609	26.627	0.30469			2024-04-09 04:00:00	42	75	3.2	0.9	15.6
2024-04-09 05:00:00	26	39	1.9	1	12.3	0.4	8.9		0.16		63.1968	97.7584	0.821	11.243	41.33	1.60923	0.761	33.73	0.28011			2024-04-09 05:00:00	36	70	4.2			0.66	3.6		0.41		57.2785	82.8526	0.517	3.992	41.521	1.22282	8.297	24.405	0.29396			2024-04-09 05:00:00	34	53	1.7	1.3	12
2024-04-09 06:00:00	19	39	1.4	4.4	14	0.47	8.3		0.16		62.3252	90.6699	6.432	23.988	43.832	1.90822	0.021	28.214	0.34662			2024-04-09 06:00:00	36	61	4.7			0.9	3.7		0.49		70.9151	102.194	3.178	12.404	59.594	1.59733	1.771	24.212	0.38008			2024-04-09 06:00:00	27	53	1.6	1.7	18
2024-04-09 07:00:00	17	49	1.7	15.6	19.3	0.78	7.2		0.22		62.3873	90.4916	7.552	23.232	35.767	1.53388	9.729	20.516	0.33865			2024-04-09 07:00:00	37	69	5.9			1.24	4.9		0.58		67.066	97.9119	3.806	19.509	48.671	1.48474	16.293	16.683	0.41679			2024-04-09 07:00:00	32	54	2.1	8.4	25.6
2024-04-09 08:00:00	19	71	3	15.7	27	1.07	15.3		0.29		58.5353	85.3045	5.838	14.754	27.988	1.22373	22.935	14.418	0.28316			2024-04-09 08:00:00	41	71	4.1			1.28	14.1		0.51		50.1958	72.0394	2.123	9.567	25.936	0.95043	33.887	9.755	0.31197			2024-04-09 08:00:00	29	50	3	3.9	18
2024-04-09 09:00:00	31	79	3.6	24	41.6	1.48	20.4		0.38		52.2959	75.8421	3.044	12.128	25.182	1.05599	35.29	12.11	0.27922			2024-04-09 09:00:00	42	74	3.8			1.02	35.9		0.39		42.9462	61.3502	1.998	5.399	14.641	0.58437	47.314	9.717	0.22633			2024-04-09 09:00:00	42	57	2.9	3.3	16.5
2024-04-09 10:00:00	40	84	2.9	10.2	42.3	1.12	38		0.32		43.9001	65.1661	2.176	6.978	19.378	0.80925	55.167	9.9	0.24741			2024-04-09 10:00:00	43	79	3.7			0.86	63.7		0.35		35.0701	51.2903	5.325	3.748	11.231	0.45596	60.508	8.511	0.18693			2024-04-09 10:00:00	45	56	2.4	1.3	10.5
2024-04-09 11:00:00	45	75	2.8	4.6	32.7	0.87	69.9		0.26		40.7441	60.6012	2.423	4.688	16.082	0.64539	71.208	8.646	0.23589			2024-04-09 11:00:00	41	71	4.6			0.58	85.1		0.26		32.4613	48.1668	7.831	2.593	9.168	0.39322	73.152	7.468	0.17308			2024-04-09 11:00:00	50	67	4.3	1.4	13.5
2024-04-09 12:00:00	43	77	3.2	2.2	25.5	0.81	109.4		0.27		51.7572	72.939	2.168	3.013	12.993	0.58648	88.387	7.131	0.21353			2024-04-09 12:00:00	33	65	3.4			0.47	88.1		0.18		41.2548	60.7452	6.092	1.677	7.926	0.40442	92.033	6.734	0.16618			2024-04-09 12:00:00	42	66	4.9	1.4	13.2
2024-04-09 13:00:00	44	90	3.1	2	24.5	0.65	89		0.19		54.3962	75.0462	2.151	1.707	9.289	0.53644	104.233	6.341	0.16214			2024-04-09 13:00:00	37	74	3.5			0.56	84.7		0.18		49.2213	71.8238	4.369	1.15	6.553	0.40234	104.232	6.158	0.12808			2024-04-09 13:00:00	38	57	3.7	1.1	9.6
2024-04-09 14:00:00	40	78	2.5	2.6	22.7	0.54	51.6		0.16		42.7255	58.9679	1.639	1.519	7.215	0.39369	88.418	4.663	0.11267			2024-04-09 14:00:00			5.5			0.44	63.1		0.19		52.3351	72.3847	2.841	1.107	7.244	0.41348	109.691	5.664	0.12528			2024-04-09 14:00:00	32	51	2.8	1.7	7.9
2024-04-09 15:00:00	37	88	3	3.3	31.2	0.66	43.9		0.19		33.7061	49.0029	1.838	1.738	7.735	0.3518	70.819	3.785	0.09915			2024-04-09 15:00:00	24	44	5.1			0.36	48.9		0.15		44.3711	61.8732	1.601	1.371	8.713	0.42191	94.195	5.878	0.13781			2024-04-09 15:00:00	29	47	2.6	1.8	10
2024-04-09 16:00:00	35	78	3	13.8	40	0.89	24.6		0.29		34.0574	51.2723	1.774	1.951	10.599	0.41347	69.519	4.466	0.11942			2024-04-09 16:00:00	25	53	5.1			0.43	36.4		0.2		42.6404	63.1861	1.645	1.281	10.169	0.44298	88.207	6.186	0.14994			2024-04-09 16:00:00	29	42	2	1.3	9.2
2024-04-09 17:00:00	36	54	2.6	19.7	30.3	1.11	12.5		0.34		29.5526	48.2418	2.343	1.823	16.139	0.47889	58.593	5.4	0.15168			2024-04-09 17:00:00	27	50	6.6			0.44	21.7		0.22		36.3071	56.7651	5.529	1.193	15.262	0.48501	80.653	7.399	0.18192			2024-04-09 17:00:00	30	37	2.3	1.5	9.3
2024-04-09 18:00:00	38	61	3.4	25.3	29	1.31	8.8		0.39		30.55	51.94	3.366	1.328	23.475	0.56042	45.397	6.665	0.15783			2024-04-09 18:00:00	21	46	7.7			0.45	18.3		0.19		28.2383	47.3499	9.773	1.005	18.061	0.33888	46.671	5.881	0.13472			2024-04-09 18:00:00	21	42	2.2	1.1	10
2024-04-09 19:00:00	35	62	4	14.9	26.3	0.96	7.8		0.31		33.2227	56.7685	4.059	1.623	29.014	0.7455	40.413	8.145	0.20501			2024-04-09 19:00:00	17	50	7.5			0.52	12.9		0.2		34.8693	58.1745	11.157	1.947	31.299	0.46969	29.418	12.867	0.1872			2024-04-09 19:00:00	21	44	2.3	0.8	11.2
2024-04-09 20:00:00	29	63	4.7	22.1	25.3	1.01	6.4		0.31		35.0175	60.1265	3.738	2.058	32.447	0.95875	32.903	9.57	0.24632			2024-04-09 20:00:00	20	51	8.1			0.52	11.5		0.2		38.5777	64.3667	11.726	1.436	32.799	0.65339	30.939	13.833	0.24324			2024-04-09 20:00:00	21	42	2.1	0.8	10.7
2024-04-09 21:00:00	26	63	4.1	15.4	25.6	0.93	4.7		0.3		36.3853	62.252	3.04	1.923	31.307	0.99191	27.574	10.604	0.26253			2024-04-09 21:00:00	23	58	9.5			0.5	9.2		0.21		39.5434	66.5644	7.354	1.091	29.993	0.78554	31.849	13.847	0.26679			2024-04-09 21:00:00	29	36	1.9	1	9
2024-04-09 22:00:00	27	54	3.2	14.2	25	0.93	2.8		0.26		34.8025	60.9028	3.009	1.362	27.614	0.92037	26.325	12.094	0.2661			2024-04-09 22:00:00	15	49	8.6			0.5	7.4		0.21		41.1887	67.9075	7.197	1.151	31.559	0.85099	24.233	18.756	0.28848			2024-04-09 22:00:00	16	40	2	1.3	8.2
2024-04-09 23:00:00	27	51	3.8	9.1	22.9	0.79	3.7		0.25		33.84	60.5904	2.109	0.538	22.872	0.86494	27.083	14.952	0.24739			2024-04-09 23:00:00	11	45	6.8			0.42	7		0.17		41.9636	66.3268	3.51	0.341	23.637	0.71323	28.154	18.978	0.26495			2024-04-09 23:00:00	17	36	2	1	8.5
2024-04-10	27	43	4	6.5	18.9	0.66	6		0.22		37.0436	62.4527	1.703	0.338	19.951	0.77134	28.043	18.469	0.23064			2024-04-10	13	39	1.8			0.36	7.5		0.16		34.6215	55.0736	2.677	0.195	16.052	0.50195	31.572	17.148	0.18107			2024-04-10	9	31	1.9	0.9	8.9
2024-04-10 01:00:00	21	55	2.2	1.7	17	0.48	7.4		0.18		39.5966	63.516	1.587	0.31	17.371	0.67918	31.224	20.594	0.18527			2024-04-10 01:00:00	9	38	3.7			0.38	6		0.19		28.4456	45.4981	1.876	0.249	10.938	0.31615	33.347	17.42	0.09081			2024-04-10 01:00:00	14	31	2	0.7	9.1
2024-04-10 02:00:00	22	56	1.5	0.9	12.6	0.46	12.2		0.16		36.3748	58.2972	1.371	0.705	19.03	0.59803	25.951	31.719	0.13723			2024-04-10 02:00:00	12	42	3.9			0.38	6.4		0.21		26.87	41.5884	1.428	0.298	10.176	0.28908	34.796	21.596	0.07654			2024-04-10 02:00:00	5	27	1.9	0.1	9.6
2024-04-10 03:00:00	18	51	1.6	2.6	15.1	0.58	8.2		0.21		31.3495	49.883	1.138	1.472	22.649	0.56868	20.013	30.118	0.1105			2024-04-10 03:00:00	21		3.3			0.5	10.8		0.23		25.3325	39.5111	1.225	0.652	12.975	0.30417	29.319	23.628	0.09297			2024-04-10 03:00:00	8	30	2.4	0.8	12.1
2024-04-10 04:00:00	21	50	1.9	1.6	15.1	0.49	7.1		0.21		30.9091	48.196	0.983	4.241	28.756	0.73683	13.224	24.923	0.12021			2024-04-10 04:00:00	24	46	3.6			0.41	15.6		0.23		25.6672	39.0403	1.226	2.436	22.898	0.42944	17.162	29.891	0.12208			2024-04-10 04:00:00	9	29	3.2	1.1	15.2
2024-04-10 05:00:00	15	54	1.6	1.7	12.3	0.44	3.3		0.2		29.8079	46.1394	0.869	19.531	41.843	1.4899	2.12	27.081	0.20756			2024-04-10 05:00:00	25	48	4.1			0.55	7.3		0.39		22.7499	33.9917	1.282	10.559	36.007	0.7484	4.804	34.435	0.16811			2024-04-10 05:00:00	10	36	2.3	1.3	13.3
2024-04-10 06:00:00	23	53	1.8	14.1	15.8	0.7	4.8		0.24		23.289	36.3136	3.516	32.813	42.164	1.64406	0.271	26.707	0.2699			2024-04-10 06:00:00	30	56	5.6			0.78	4.6		0.41		16.3522	24.796	13.776	12.067	36.744	0.66126	4.309	25.122	0.17056			2024-04-10 06:00:00	22	41	2.6	5	14.8
2024-04-10 07:00:00	24	52	2.1	15.8	18.9	0.79	9		0.23		17.097	27.7687	3.614	25.781	31.713	0.98679	9.651	16.469	0.22666			2024-04-10 07:00:00	27	53	5.1			1.04	8.1		0.47		10.4627	17.4092	9.715	11.171	22.145	0.4117	17.867	12.083	0.1354			2024-04-10 07:00:00	19	37	2.4	6.7	12.7
2024-04-10 08:00:00	30	52	3.5	32.7	22.5	1.32	9.9		0.34		16.5961	32.0365	3.02	25.369	26.325	0.7646	14.467	12.591	0.20718			2024-04-10 08:00:00	30	54	5.3			0.88	18.6		0.33		13.2533	42.9429	4.57	10.001	15.791	0.38582	23.555	8.592	0.12573			2024-04-10 08:00:00	28	39	2.6	6.7	13.1
2024-04-10 09:00:00	29	60	3.6	16.5	24	0.79	18.7		0.27		16.8349	27.3289	1.389	16.675	18.728	0.59353	21.133	11.295	0.22308			2024-04-10 09:00:00	32	59	5.3			0.67	27.4		0.3		15.47	48.6344	1.127	9.173	13.634	0.39262	27.435	10.49	0.1389			2024-04-10 09:00:00	13	44	3.8	6.6	12.7
2024-04-10 10:00:00	32	63	3.6	19.7	26.6	0.81	19.6		0.28		20.3695	29.7501	2.235	11.751	15.47	0.43288	28.291	9.592	0.18554			2024-04-10 10:00:00	21		2.4			0.35	29.2				20.7402	52.9524	4.256	7.785	11.935	0.31984	31.8	9.04	0.12621			2024-04-10 10:00:00	20	41	2.6	3.3	10.5
2024-04-10 11:00:00	32	58	2.7	13	22.4	0.67	26.7		0.23		22.8762	33.1847	4.431	8.754	12.906	0.35203	33.919	8.275	0.16275			2024-04-10 11:00:00		44	3.4			0.31					25.0986	55.2044	6.467	5.551	9.894	0.26913	39.321	7.813	0.12127			2024-04-10 11:00:00	27	40	2.3	1.6	8.2
2024-04-10 12:00:00	29	42	2.4	9.2	18.1	0.56	32.1		0.18		15.0891	23.9286	4.58	5.579	10.3	0.32733	43.09	7.257	0.14502			2024-04-10 12:00:00	3	42	2.4			0.3			0.12		19.0215	46.9629	6.676	3.013	6.841	0.24282	49.405	6.719	0.10963			2024-04-10 12:00:00	26	30	2.9	1.6	8.9
2024-04-10 13:00:00	36	65	1.4	4.8	10.6	0.38	29.2		0.09		8.34299	17.1412	1.634	4.553	7.693	0.26022	39.548	6.284	0.08679			2024-04-10 13:00:00	8	45					33.2		0.12		9.30054	28.5378	4.295	2.075	4.842	0.19713	50.188	6.405	0.08227			2024-04-10 13:00:00	28	29	2.6	2.1	9.7
2024-04-10 14:00:00	28	53	0.8	4.6	10.5	0.37	30.7		0.09		9.30722	18.4581	0.576	3.806	5.014	0.25635	33.038	4.705	0.08884			2024-04-10 14:00:00	19	51	2.6			0.33	27.5				8.12659	25.3668	2.377	4.299	6.971	0.1971	35.217	5.602	0.07722			2024-04-10 14:00:00	26	41	2.6	2.2	12.6
2024-04-10 15:00:00	32	42	0.8	7.2	13.5	0.47	29.7		0.11		13.4705	23.7864	0.425	3.809	6.654	0.31582	39	3.977	0.09961			2024-04-10 15:00:00	25	44					29.6		0.11		12.1866	40.9496	0.461	3.121	5.652	0.20363	35.721	4.34	0.0712			2024-04-10 15:00:00	33	63	2.4	2.4	16.6
2024-04-10 16:00:00	14	35	0.6	6.2	20.8	0.58	26.2		0.14		13.8961	25.851	0.426	4.169	9.22	0.42059	40.393	4.888	0.11875			2024-04-10 16:00:00	19	36	3.1			0.49			0.14		13.9858	52.0764	0.393	2.719	7.497	0.2661	41.202	4.248	0.07866			2024-04-10 16:00:00	29	44	2.5	2	17.1
2024-04-10 17:00:00	17	30	0.6	4.7	22.6	0.65	27.9		0.16		11.9748	24.9998	0.953	4.888	17.459	0.50817	32.807	7.568	0.15691			2024-04-10 17:00:00	16		4.4		20.7	0.55	27				14.0917	57.3905	3.547	2.485	12.231	0.35368	38.751	6.819	0.12697			2024-04-10 17:00:00	16	40	2.6	2	21.8
2024-04-10 18:00:00	10	21	0.7	5.1	25	0.71	29.4		0.17		10.1434	21.9968	1.073	2.937	21.148	0.60346	37.547	7.51	0.11928			2024-04-10 18:00:00	14		8.1	0.6	27.5	0.6	23.5		0.16		12.1363	49.0268	6.276	1.241	19.349	0.45792	41.172	10.842	0.15183			2024-04-10 18:00:00	22	38	4.1	2.5	26.1
2024-04-10 19:00:00	12	20	0.7	3.9	22.1	0.57	32.2		0.12		10.7681	21.9586	0.977	2.596	21.095	0.63891	43.527	7.067	0.12213			2024-04-10 19:00:00	10		7.3	0.3	23.9	0.54	27.5		0.13		12.9342	39.4304	5.475	0.991	16.255	0.42959	47.543	9.215	0.12492			2024-04-10 19:00:00	13	24	5.5	1.9	20.7
2024-04-10 20:00:00	6	18	0.7	3.2	19.4	0.49	37		0.11		9.15634	18.119	0.681	1.979	16.892	0.63797	46.948	6.941	0.10914			2024-04-10 20:00:00	6		4.6		19.5	0.48	32.8		0.11		11.1958	30.7763	3.768	0.645	12.896	0.42794	51.342	8.755	0.1036			2024-04-10 20:00:00	13	14	4.4	1.1	18.4
2024-04-10 21:00:00	8	13	1.1	2.4	18.1	0.47	38.7		0.1		7.89055	15.9055	0.412	1.321	11.697	0.52268	51.174	6.35	0.09126			2024-04-10 21:00:00	6		4.1		14.9	0.42	38.1		0.09		9.80841	28.0145	2.197	0.476	9.558	0.38262	53.809	8.474	0.08858			2024-04-10 21:00:00	5	13	3	0.9	15.2
2024-04-10 22:00:00	12	13	1.6	1.9	16.9	0.46	39.7		0.09		4.51025	9.71161	0.763	0.967	9.811	0.46523	51.164	7.508	0.09175			2024-04-10 22:00:00	6		3.6		13.5	0.4	39.7		0.08		6.05257	20.8088	2.936	0.413	8.313	0.34834	52.974	9.893	0.08219			2024-04-10 22:00:00	14	9	3	0.7	12
2024-04-10 23:00:00	14	9	2.5	1.4	12.9	0.36	45.2		0.06		3.3828	7.00945	0.863	0.39	5.69	0.35716	53.041	7.537	0.06091			2024-04-10 23:00:00	2		3.2		9.3	0.32	45		0.06		4.47023	15.4473	0.889	0.171	5.076	0.29312	53.513	10.459	0.06476			2024-04-10 23:00:00	22		2.6	0.3	11
2024-04-11	6	10	4.8	1	10	0.32	48.2		0.06		3.82882	7.44248	0.975	0.247	3.954	0.26703	54.4	7.765	0.03659			2024-04-11	1		2.6		7.6	0.3	46.4		0.06		4.28757	13.4198	0.815	0.097	3.166	0.23864	54.535	10.335	0.03708			2024-04-11	22		2.5	0.3	9.4
2024-04-11 01:00:00		13	3.6	0.4	7.6	0.29	51		0.05		4.00965	7.47087	1.295	0.255	4.512	0.24757	54.125	9.371	0.01666			2024-04-11 01:00:00	1		2	1.3	6.4	0.26	47.9		0.05		3.94113	11.6656	0.731	0.1	2.748	0.22297	55.399	11.635	0.02117			2024-04-11 01:00:00	13	6	2.4		7.1
2024-04-11 02:00:00		11	1.8	0.5	5.9	0.27	52.8		0.05		4.51201	8.11606	2.006	0.286	5.543	0.24234	53.264	9.595	0.01549			2024-04-11 02:00:00	4		1.9	1.6	6.8	0.26	46.1		0.04		3.23122	9.25509	0.725	0.123	2.827	0.21912	55.225	11.416	0.01867			2024-04-11 02:00:00	5	4	2.5		7
2024-04-11 03:00:00		9	1.8	0.4	5.5	0.26	52.7		0.05		6.7499	11.4698	1.725	0.562	7.575	0.27098	51.211	9.531	0.01927			2024-04-11 03:00:00	3		1.9	1.3	6.3	0.25	46.4		0.04		4.05942	10.6567	0.481	0.219	3.887	0.23202	53.873	11.773	0.02498			2024-04-11 03:00:00	8	7	2.9		7.6
2024-04-11 04:00:00		8	3.1	0.7	6.9	0.27	51.2		0.05		8.04918	13.1957	1.624	1.438	13.893	0.39887	45.045	9.002	0.0317			2024-04-11 04:00:00	1		1.9	1.5	6.2	0.25	46.4		0.03		5.04846	12.883	0.453	0.534	8.175	0.29879	49.691	12.769	0.03565			2024-04-11 04:00:00	8	7	3		7.3
2024-04-11 05:00:00	2	5	2	0.7	9.9	0.32	45.9		0.06		7.57021	12.1687	1.476	3.533	25.363	0.74498	34.279	10.005	0.06541			2024-04-11 05:00:00	1		1.9	1.6	7.2	0.28	43.6		0.05		4.28712	13.1015	0.398	1.077	14.598	0.44264	43.676	13.89	0.05558			2024-04-11 05:00:00	8	5	2.1	0.3	7.3
2024-04-11 06:00:00	8	11	1.6	1.8	19.9	0.42	36.9		0.08		7.59627	12.3148	1.828	5.103	31.989	0.81193	27.233	10.519	0.09912			2024-04-11 06:00:00	1		2.1	2.1	17.9	0.37	33.9		0.07		5.18233	16.7715	6.425	1.905	22.501	0.5259	36.052	15.333	0.08353			2024-04-11 06:00:00	1	3	2.1		11.7
2024-04-11 07:00:00	10	15	2.1	4.6	29.9	0.68	27.9		0.14		8.45123	14.9624	1.66	7.12	33.01	0.73068	25.882	10.215	0.14564			2024-04-11 07:00:00	1		2.1	3.6	24.5	0.59	28.7		0.13		7.05441	25.7069	6.041	2.898	24.698	0.52017	33.553	14.785	0.13065			2024-04-11 07:00:00	3	7	2.5	1	17.8
2024-04-11 08:00:00	9	18	2.2	9	33.4	0.95	23.5		0.21		6.83911	13.762	0.917	6.412	28.803	0.66692	29.18	10.292	0.14824			2024-04-11 08:00:00	4		2.2	5.8	31.8	0.77	21.8		0.23		6.13195	13.5523	3.06	2.474	19.768	0.48858	37.11	14.57	0.14413			2024-04-11 08:00:00	5	20	3	3.1	20.8
2024-04-11 09:00:00	6	21	2.4	10.5	30.4	0.75	26.2		0.19		7.22723	16.956	1.595	4.367	24.38	0.56467	33.7	6.853	0.15644			2024-04-11 09:00:00	3		2.4	8.4	28.4	0.65	24.7		0.24		6.22168	15.035	0.436	3.461	21.547	0.50096	34.692	10.124	0.18444			2024-04-11 09:00:00	19	20	2.9	4	19.7
2024-04-11 10:00:00	8	19	2.4	6.9	22.6	0.51	33.6		0.15		8.4864	22.8048	3.68	5.92	25.418	0.5575	32.971	7.947	0.18021			2024-04-11 10:00:00	3		2.5			0.58	28.6		0.23		6.68668	17.8511	2.829	5.925	23.893	0.49592	32.74	11.531	0.21532			2024-04-11 10:00:00	20	31	3.1	2.9	19.8
2024-04-11 11:00:00	8	13	2.3	7	25.7	0.59	33.5		0.18		8.13833	21.259	5.537	5.808	25.391	0.55021	34.601	7.86	0.19784			2024-04-11 11:00:00	4	29	1.9			0.47	33.9		0.21		7.91669	18.8706	4.992	7.451	24.311	0.48943	33.363	12.463	0.24913			2024-04-11 11:00:00	24	39	3.1	1.2	14.7
2024-04-11 12:00:00	10	25	2.1	5.5	23.2	0.58	38		0.18		13.4306	28.0787	4.142	6.777	16.2	0.49623	46.383	7.894	0.18452			2024-04-11 12:00:00	10	33	2.3	3.7	19.8	0.48	37.4		0.22		12.7571	26.0962	3.243	4.27	15.503	0.39194	42.035	9.547	0.19351			2024-04-11 12:00:00	17	36	4	0.9	15
2024-04-11 13:00:00	12	49	3.8	8.4	35.2	0.8	33.4		0.32		16.2317	30.4618	4.116	7.099	17.958	0.60246	53.928	8.767	0.21613			2024-04-11 13:00:00	17	36	3.8	3.1	26	0.55	37.6		0.24		9.5929	21.0449	3.036	3.365	15.286	0.39993	41.866	7.756	0.16299			2024-04-11 13:00:00	12	29	3.5	0.8	16.1
2024-04-11 14:00:00	17	57	3.9	10	34.7	0.83	30.4		0.22		13.9958	23.7087	2.673	2.661	16.574	0.49401	47.807	5.704	0.16009			2024-04-11 14:00:00	17	41	3.7	2.5	22.2	0.47	38.7		0.22		5.17814	11.8798	2.899	3.191	23.963	0.42913	32.61	6.306	0.18089			2024-04-11 14:00:00	12	36	2.4	0.4	12.9
2024-04-11 15:00:00	21	28	2.5	7.5	26.2	0.64	35.1		0.18		14.6984	25.464	1.405	2.23	17.567	0.55049	47.504	5.564	0.16584			2024-04-11 15:00:00	6	7	2.1	2.4	11.5	0.31	45		0.09		6.35533	13.6632	1.312	2.469	20.28	0.37589	40.795	5.31	0.14594			2024-04-11 15:00:00	5	16	1.8	1	16.7
2024-04-11 16:00:00	14	31	2.3	9.8	32.5	0.75	27.6		0.22		17.6382	29.5654	0.758	2.45	15.761	0.5034	44.546	4.271	0.14729			2024-04-11 16:00:00	1	9	2.4	2.8	16.6	0.35	36.9		0.16		13.9688	25.4264	0.966	2.815	19.579	0.34582	36.792	4.376	0.13891			2024-04-11 16:00:00	10	33	1.8	1.4	19.6
2024-04-11 17:00:00	11	17	2.4	4.5	30.6	0.61	26		0.18		18.3189	33.6446	2.18	2.956	19.733	0.56502	41.408	3.688	0.17631			2024-04-11 17:00:00	1	9	1.8	2.6	13.9	0.36	39.5		0.08		15.332	29.7421	2.97	3.673	23.562	0.36568	34.636	3.137	0.14958			2024-04-11 17:00:00	4	11	2.2	0.9	21.2
2024-04-11 18:00:00	6	13	2.3	5.6	31.4	0.68	25.4		0.18		14.2309	29.031	3.503	2.552	22.407	0.63496	36.573	5.044	0.16104			2024-04-11 18:00:00	1	9	1.9	3.2	28.2	0.73	25.2		0.23		13.2033	29.5003	4.81	3.406	28.727	0.42102	27.632	4.986	0.16019			2024-04-11 18:00:00	4	19	2.4	1.1	26.4
2024-04-11 19:00:00	12	18	2.3	6.5	32.6	0.66	24.7		0.18		13.1161	25.3046	4.159	3.102	25.789	0.78154	30.815	6.332	0.18089			2024-04-11 19:00:00	1	12	2.1	3.7	31.8	0.68	18.2		0.27		7.72199	16.1959	5.502	4.013	31.446	0.47627	22.538	6.064	0.17642			2024-04-11 19:00:00		13	2.1	0.9	21.1
2024-04-11 20:00:00	12	8	2.2	5	29.8	0.54	24		0.13		8.7085	18.5321	3.415	2.762	25.533	0.86367	28.89	7.171	0.18011			2024-04-11 20:00:00	3	13	2.5	3.5	27.3	0.58	20.3		0.35		3.84638	8.67065	2.554	3.669	30.347	0.51351	18.302	2.611	0.17639			2024-04-11 20:00:00	3	17	2.5	1.3	31.3
2024-04-11 21:00:00	9	11	2.2	3.5	30	0.58	22.1		0.17		7.50619	16.9523	2.454	1.841	19.868	0.75866	33.333	8.416	0.1606			2024-04-11 21:00:00	7	9	1.8	3.4	26.2	0.59	21.4		0.23		3.067	6.12277	2.647	2.199	25.971	0.4781	21.962	6.349	0.16028			2024-04-11 21:00:00	11	15	2.2	1.9	29.9
2024-04-11 22:00:00	2	9	2.3	3.3	27.8	0.55	23.2		0.15		6.3083	14.0211	1.556	1.264	19.261	0.70343	30.915	8.418	0.16178			2024-04-11 22:00:00	2	11	1.6	3.6	27	0.61	21.9		0.19		2.64981	5.83217	1.557	1.135	16.462	0.37317	33.604	6.114	0.10989			2024-04-11 22:00:00	11	14	2.9	1.2	22.6
2024-04-11 23:00:00		10	2.1	1.3	17.8	0.39	35.4		0.09		1.77659	6.80951	0.209	0.466	10.357	0.48266	39.31	8.659	0.10243			2024-04-11 23:00:00	1	9	1.5	2.8	15.9	0.38	31.8		0.11		2.17257	4.50328	0.178	0.432	10.984	0.3406	36.982	7.949	0.10292			2024-04-11 23:00:00	8	12	2.1	0.3	12.2
2024-04-12		9	1.4	0.8	10	0.32	44.3		0.07		1.07768	4.81048	0.031	0.275	3.803	0.29782	47.633	7.952	0.0444			2024-04-12	1	7	1.3	2.4	11.8	0.31	36		0.09		0.72631	2.94883	0.018	0.28	7.48	0.30934	40.395	10.821	0.0801			2024-04-12		8	2		11.8
2024-04-12 01:00:00	10	13	1.2	0.3	6.4	0.29	49.2		0.06		0.84979	3.64778	0.017	0.245	3.255	0.24302	48.915	7.181	0.01546			2024-04-12 01:00:00	1	11	1.8	1	8.9	0.25	39.1		0.07		0.76678	2.97193	0.024	0.219	3.259	0.22722	47.874	10.262	0.02384			2024-04-12 01:00:00		16	1.5	0.2	9.3
2024-04-12 02:00:00	9	11	1.2	0.4	7	0.33	46.5		0.07		0.74467	3.01648	0.02	0.291	3.702	0.24341	48.515	7.369	0.01372			2024-04-12 02:00:00	3	12	1.8	0.7	8.5	0.27	39.4		0.08		0.54947	1.73339	0.022	0.271	3.776	0.22588	48.068	10.045	0.01805			2024-04-12 02:00:00		18	2	0.6	10.2
2024-04-12 03:00:00	6	19	1.1	0.3	6.9	0.31	47		0.06		0.93386	3.32725	0.029	0.53	6.095	0.27761	46.681	7.946	0.0175			2024-04-12 03:00:00	5	14	1.7	0.9	6.8	0.27	39.8		0.1		0.41245	1.02706	0	0.5	5.643	0.24328	46.253	9.452	0.02704			2024-04-12 03:00:00	8	20	2.2	0.2	12.1
2024-04-12 04:00:00	6	23	1.1	0.3	7.1	0.32	49.1		0.06		1.25797	3.90059	0.086	1.316	13.213	0.42687	41.206	7.889	0.03077			2024-04-12 04:00:00	6	18	1.5	1.1	6.3	0.28	41		0.07		0.86745	1.81737	0.055	1.23	11.806	0.31856	39.994	10.829	0.03835			2024-04-12 04:00:00	8	29	2.1	0.2	12
2024-04-12 05:00:00	3	26	0.9	0.4	9.7	0.39	45.2		0.07		2.21292	5.72967	0.143	2.4	18.178	0.63353	37.874	6.149	0.04868			2024-04-12 05:00:00	8	21	1.8	0.9	7.2	0.29	44.7		0.06		1.5155	3.51366	0.355	2.321	18.593	0.4477	33.911	10.631	0.05207			2024-04-12 05:00:00	9	30	1.7	0.8	12.3
2024-04-12 06:00:00	12	26	1	2.2	20.4	0.52	36.8		0.1		4.17881	10.2599	2.524	3.007	22.75	0.71748	33.438	6.672	0.07694			2024-04-12 06:00:00	9	28	1.8	1.4	15.1	0.4	38.4		0.09		2.96638	6.33216	2.58	3.208	24.146	0.51795	30.09	8.302	0.06803			2024-04-12 06:00:00	3	25	2.1	1.5	18.5
2024-04-12 07:00:00	10	37	1.3	5.4	31	0.75	29.8		0.14		6.13304	12.7315	3.568	3.945	26.361	0.70336	31.68	5.894	0.11743			2024-04-12 07:00:00	8	31	2	2.8	24.3	0.58	32.7		0.14		5.38616	10.2191	3.272	4.107	26.293	0.51268	28.15	8.586	0.10801			2024-04-12 07:00:00	12	33	2.4	3.2	24.9
2024-04-12 08:00:00	20	37	1.8	10.6	38.4	1	24.3		0.22		7.18065	15.285	1.684	3.439	18.741	0.60216	39.757	5.15	0.10193			2024-04-12 08:00:00	9	35	2.6	5.8	32.6	0.68	27.3		0.21		4.84397	10.7005	1.939	3.687	20.677	0.49502	35.838	7.456	0.11519			2024-04-12 08:00:00	18	40	2.8	5.2	30.2
2024-04-12 09:00:00	20	38	1.9	7.5	32.6	0.72	30.1		0.16		9.9988	19.0746	0.714	3.542	10.574	0.4562	49.136	2.749	0.1135			2024-04-12 09:00:00	17	38	2.6	5.2	30.9	0.56	30.9		0.16		9.4121	17.3989	0.586	2.741	7.959	0.36222	53.278	3.968	0.08983			2024-04-12 09:00:00	24	35	3	3.5	20.1
2024-04-12 10:00:00			1.7	5.5	25.7	0.53					14.1619	24.8059	1.748	3.286	9.557	0.40601	53.373	1.832	0.1026			2024-04-12 10:00:00	19	36	4	6.6	28.4	0.46	34.4		0.14		14.4396	24.2654	3.546	1.244	9.639	0.35254	55.018	2.768	0.09593			2024-04-12 10:00:00	25	29	2	2.5	16.7
2024-04-12 11:00:00	18	39	1.9	6.3	27.7	0.54	34.2				17.3874	29.4566	2.916	2.805	9.77	0.37695	54.118	1.055	0.10334			2024-04-12 11:00:00	19	39	3.7	4.3	21.3	0.41	41.2		0.13		17.3562	28.3622	4.529	1.718	8.551	0.32693	57.468	2.027	0.09855			2024-04-12 11:00:00	21	32	2	2.1	14.3
2024-04-12 12:00:00	20	40	2.9	4.6	24.7	0.49	39.6		0.11		19.9274	33.2912	2.372	2.184	9.101	0.37185	55.564	0.75	0.10332			2024-04-12 12:00:00	18	35	2.6	3	17.9	0.4	45.2		0.11		19.3257	31.3899	3.429	1.46	7.677	0.3184	59.536	1.648	0.10172			2024-04-12 12:00:00	19	35	2.6	2.7	15
2024-04-12 13:00:00	15	37	2.2	5.1	23.9	0.47	40		0.11		21.6764	35.8042	2.62	2.488	9.124	0.36492	55.705	0.833	0.08132			2024-04-12 13:00:00	15		2.4	3.5	17.3	0.35	45.5		0.09		18.3676	30.6148	2.765	1.23	6.348	0.2995	60.57	1.679	0.07696			2024-04-12 13:00:00	8	35	2.3	2	14.6
2024-04-12 14:00:00	21	39	1.7	5.1	26.2	0.48	38.3		0.13		20.0166	34.1616	2.417	1.951	9.529	0.34024	51.588	0.777	0.09083			2024-04-12 14:00:00	13		2.6	3.9	19.8	0.34	41.6		0.09		15.0096	26.5221	1.37	0.842	5.728	0.27569	56.878	2.186	0.07445			2024-04-12 14:00:00	3	32	1.9	2.3	12.8
2024-04-12 15:00:00	14	41	2	7	34.1	0.54	29.4		0.18		19.1002	34.5513	1.765	3.381	8.782	0.3489	49.311	1.567	0.09355			2024-04-12 15:00:00	13		2.5	3.8	21.5	0.34	40.1		0.08		15.1786	28.2243	0.195	1.146	5.605	0.26863	53.61	2.56	0.07896			2024-04-12 15:00:00	5	33	1.9	2	15
2024-04-12 16:00:00	18	39	2	7.4	37.7	0.59	25.5		0.19		18.7541	36.3471	1.671	3.093	10.689	0.36189	44.758	1.789	0.10099			2024-04-12 16:00:00	10		2.3	2.9	20.1	0.37	41.3		0.1		14.9976	29.8959	0.108	1.295	6.125	0.26525	50.737	2.875	0.08359			2024-04-12 16:00:00	11	34	2	2.1	18.2
2024-04-12 17:00:00	21	37	2.2	8.4	39.2	0.75	24.8		0.2		19.1967	39.005	2.366	2.708	14.744	0.40696	39.923	2.627	0.12657			2024-04-12 17:00:00	5		2.2	2.9	25	0.47	37.2		0.13		16.2997	33.6578	2.583	0.983	9.967	0.2771	46.415	3.345	0.10719			2024-04-12 17:00:00	14	30	2.3	1.9	21.2
2024-04-12 18:00:00	21	36	2.2	8.3	39.7	0.78	22.2		0.21		20.2865	41.8725	3.494	2.82	19.49	0.47756	34.473	3.521	0.12319			2024-04-12 18:00:00	8	23	2.5	2.8	23.7	0.51	36.8		0.13		19.5044	38.0335	4.461	0.666	12.264	0.28404	43.996	3.986	0.10357			2024-04-12 18:00:00	16	38	2	1.8	20.7
2024-04-12 19:00:00	21	37	2.5	6.9	36.2	0.69	23.7		0.18		21.2628	42.0626	2.657	3.32	21.841	0.54636	30.598	2.407	0.13999			2024-04-12 19:00:00	10	24	2.2	2.6	22.3	0.43	36.9		0.11		21.0975	37.6643	1.922	0.698	12.357	0.28493	42.462	0.068	0.10781			2024-04-12 19:00:00	11	33	1.9	1.7	16.3
2024-04-12 20:00:00	16	39	2.1	4.4	30.6	0.53	28.3		0.13		18.2991	37.1749	2.677	2.442	19.22	0.52948	30.912	4.272	0.12712			2024-04-12 20:00:00	9	29	1.9	2	17	0.35	39.9		0.08		14.5311	30.2291	2.949	0.448	9.238	0.26444	42.789	4.154	0.08798			2024-04-12 20:00:00	10	29	2.1	1.2	13.5
2024-04-12 21:00:00	17	37	2	3.5	27.1	0.51	30.9		0.13		17.6245	35.8422	2.025	1.857	15.881	0.4689	33.462	4.15	0.11687			2024-04-12 21:00:00	9	15	1.7	2.1	17	0.37	39.2		0.09		14.571	29.8885	1.997	0.422	10.659	0.2876	40.45	5.179	0.09876			2024-04-12 21:00:00	10	26	2	1.2	13.9
2024-04-12 22:00:00	17	31	1.8	2.8	22.5	0.47	36.2		0.11		12.5847	25.6884	1.132	1.243	11.951	0.4092	37.176	4.23	0.10762			2024-04-12 22:00:00	9	24	1.7	2.3	15.7	0.36	40.4		0.09		11.0312	22.2998	1.973	0.356	10.266	0.28385	39.386	5.577	0.09458			2024-04-12 22:00:00	11	21	2.3	0.9	9.7
2024-04-12 23:00:00	14	30	1.6	1.3	18.1	0.42	40.6		0.08		9.0183	16.5347	0.169	0.525	6.017	0.31641	41.893	4.367	0.0721			2024-04-12 23:00:00	9	23	1.8	2	14.1	0.31	39.9		0.07		5.51546	11.512	0.224	0.162	7.141	0.26121	41.284	5.933	0.07634			2024-04-12 23:00:00	17	26	2.1	1	10
2024-04-13	12	23	1.4	0.4	12.1	0.34	45.7		0.07		5.76494	10.0988	0	0.272	3.979	0.2158	43.134	3.47	0.04089			2024-04-13	9	21	1.7	1.8	13	0.29	39.6		0.07		2.41752	5.46937	0	0.069	3.721	0.19453	43.001	6.098	0.04303			2024-04-13	9	26	2.2	1.1	10.2
2024-04-13 01:00:00	7	17	1.3	1.7	7.5	0.28	49.1		0.07		2.84656	5.98821	0.007	0.278	3.867	0.20541	43.471	5.087	0.02115			2024-04-13 01:00:00	4		0.8	0.8	11.6	0.26	38		0.08		1.63532	4.51561	0	0.065	2.915	0.179	43.937	6.833	0.02928			2024-04-13 01:00:00	18	19	3.6	0.7	10.8
2024-04-13 02:00:00	7	10	1.5	1.9	6.5	0.26	50.1		0.05		2.89035	7.00333	0	0.379	5.29	0.23306	43.798	6.472	0.02378			2024-04-13 02:00:00	2	16	0.6	0.4	9.3	0.21	41.1		0.06		1.40281	4.73543	0	0.083	3.373	0.20736	48.242	7.669	0.03204			2024-04-13 02:00:00	11	15	3.1	0.6	10.4
2024-04-13 03:00:00	5	11	1.2	1.8	7.1	0.27	49.5		0.05		5.03037	13.6177	0.141	0.683	9.568	0.29259	40.99	7.41	0.03336			2024-04-13 03:00:00	4	11	0.9	0.5	11.6	0.22	38.8		0.07		2.22556	7.95734	0.035	0.143	6.274	0.2636	51.265	8.94	0.04879			2024-04-13 03:00:00	11	17	2.9		9.8
2024-04-13 04:00:00	8	11	1.1	1.5	7.2	0.28	47.9		0.07		9.91093	26.8908	0.437	4.727	35.381	0.79575	15.679	17.742	0.10333			2024-04-13 04:00:00	3	11	0.6		11.4	0.26	37		0.13		5.01083	16.8777	0.165	0.502	20.743	0.41103	37.248	15.169	0.08897			2024-04-13 04:00:00	4	24	2.3	0.8	13
2024-04-13 05:00:00	6	17	1.3	1.7	11	0.34	38.4		0.11		10.6603	27.265	0.503	13.932	46.573	1.10186	5.079	14.605	0.13916			2024-04-13 05:00:00	1	15	1	0.1	15.9	0.38	28.7		0.2		5.76532	16.8178	0.392	1.371	43.041	0.67102	19.923	24.821	0.14824			2024-04-13 05:00:00	4	25	2	1.7	20.2
2024-04-13 06:00:00	10	21	1.6	7.5	23.4	0.58	25.7		0.16		10.7974	26.4997	4.114	18.867	49.117	1.14044	2.924	13.807	0.19961			2024-04-13 06:00:00	1	16	1.7	5.4	29.5	0.59	16.2		0.28		4.95742	12.5996	7.999	1.58	38.203	0.59761	22.811	16.494	0.14186			2024-04-13 06:00:00	16	20	3.3	1.5	18.1
2024-04-13 07:00:00	8	20	1.9	9.6	25.4	0.65	27.2		0.14		11.3984	27.9102	4.539	16.638	33.376	0.829	19.528	9.843	0.21694			2024-04-13 07:00:00	3	16	2.1	3.8	20.9	0.53	25.3		0.2		5.35768	13.7062	7.239	6.329	24.684	0.4972	35.581	11.754	0.157			2024-04-13 07:00:00	14	23	3.7	2.6	17.8
2024-04-13 08:00:00	11	17	1.6	6.2	18.5	0.49	38.2		0.1		9.34296	19.5467	2.532	10.01	21.47	0.64264	34.634	7.741	0.19102			2024-04-13 08:00:00	5	12	2.2	5.4	26.2	0.64	20.9		0.24		5.04716	9.52208	4.101	5.827	16.842	0.44608	43.587	10.094	0.16338			2024-04-13 08:00:00	14	28	3.1	2.3	16
2024-04-13 09:00:00	4	21	1.8	9.6	26.7	0.67	30.1		0.15		7.0226	12.6825	1.207	6.228	14.694	0.53909	46.811	9.759	0.11038			2024-04-13 09:00:00	9	22	1.9	6.2	29.9	0.81	26.4		0.29		4.60839	7.58414	0.856	6.542	14.621	0.50843	46.175	10.647	0.18041			2024-04-13 09:00:00	11	25	3.1	2.4	18.7
2024-04-13 10:00:00	10	20	2	12.9	29.5	0.76	30.5		0.2		6.79521	11.3987	1.884	6.521	15.542	0.5397	51.908	11.092	0.11586			2024-04-13 10:00:00	13	29	1.7	5.1	31.4	0.8	32.8		0.27		5.33978	8.63245	1.923	7.673	17.313	0.55966	51.11	11.058	0.19731			2024-04-13 10:00:00	18	29	2.9	4.5	26.7
2024-04-13 11:00:00	14	30	3	24.5	39.5	1.03	19.9		0.3		8.47844	13.8297	2.964	5.564	14.38	0.53901	58.78	11.02	0.11982			2024-04-13 11:00:00	14	30	2.2	3.5	30.6	0.78	41.6		0.34		6.92615	11.2726	3.31	8.841	21.217	0.61339	55.547	11.312	0.22304			2024-04-13 11:00:00	24	43	4	3.1	24.6
2024-04-13 12:00:00	16	24	3.2	9.3	26	0.68	31.2		0.19		13.7136	21.0003	3.076	3.804	11.327	0.5886	70.606	10.364	0.13			2024-04-13 12:00:00	12	27	3.6	4.3	27.3	0.58	26.8		0.23		9.42208	14.9281	3.418	7.84	22.075	0.63286	64.706	10.438	0.24801			2024-04-13 12:00:00	20	28	4.2	1.7	21.2
2024-04-13 13:00:00	17	34	3.1	11.4	32	0.74	26.1		0.19		16.3257	25.5216	2.858	2.997	10.855	0.52673	82.068	9.038	0.13372			2024-04-13 13:00:00	18	28	3.1	1.8	25.4	0.51	28.7		0.2		14.023	20.7482	3.223	4.707	16.311	0.53783	78.097	8.134	0.21367			2024-04-13 13:00:00	10	12	2.2	1.2	18.2
2024-04-13 14:00:00	14	32	3	10.6	32.1	0.71	26		0.21		20.5424	30.0124	1.765	1.888	8.169	0.45439	88.432	6.371	0.10979			2024-04-13 14:00:00	17	26	2.7	2.4	27.6	0.48	26.3		0.21		18.7919	27.1686	2.56	3.247	14	0.43541	75.999	4.958	0.16536			2024-04-13 14:00:00			2.4	1.2	18.7
2024-04-13 15:00:00	22	39	3.2	10.3	38.4	0.82	22		0.26		26.2187	36.0196	1.255	0.946	14.985	0.51943	73.592	5.278	0.12573			2024-04-13 15:00:00	15	31	4.9	3.4	36.1	0.63	18.1		0.32		21.6561	31.6907	1.328	1.478	16.206	0.42228	65.809	3.962	0.16405			2024-04-13 15:00:00	11	21	1.7	1.8	24.3
2024-04-13 16:00:00	19	41	3.1	12.3	33.9	0.77	24.9		0.25		25.8099	35.2425	1.014	1.72	20.924	0.58852	63.661	5.661	0.14976			2024-04-13 16:00:00	19	36	5	3.4	38.9	0.65	14.6		0.4		24.7883	35.9282	0.924	2.402	18.081	0.43681	62.442	4.339	0.17723			2024-04-13 16:00:00	14	22	1.9	1.9	20.1
2024-04-13 17:00:00	22	44	4.4	5.9	42.8	0.82	14.1		0.38		27.4494	39.2209	2.411	3.235	31.031	0.7217	49.786	7.124	0.18667			2024-04-13 17:00:00	19	33	4.6	3	39.8	0.69	13		0.33		26.0291	37.0062	2.48	3.361	25.603	0.4885	57.508	5.677	0.21499			2024-04-13 17:00:00	5	31	2.1	1.9	28.4
2024-04-13 18:00:00	21	40	4.1	5.1	39.6	0.88	15.3		0.32		32.248	47.9283	4.06	1.651	49.039	0.93839	30.548	10.581	0.22509			2024-04-13 18:00:00	20	41	3.7	3.8	42.9	0.85	8.4		0.41		29.4747	42.0552	4.724	1.622	40.708	0.63751	47.198	8.564	0.26765			2024-04-13 18:00:00	9	32	1.7	1.4	27.8
2024-04-13 19:00:00	24	45	4.2	20	49.1	1.11	4.3		0.38		40.5174	60.2291	5.599	2.004	54.135	1.1247	23.962	12.122	0.27413			2024-04-13 19:00:00	21	42	4	2.7	40	0.91	10.3		0.44		32.7374	46.8858	6.535	2.417	49.099	0.78369	37.51	10.378	0.32131			2024-04-13 19:00:00	20	27	1.8	2.7	30.4
2024-04-13 20:00:00	29	59	5	35.3	46.8	1.41	1.7		0.5		46.6643	68.443	6.033	1.99	55.204	1.23825	20.426	12.338	0.29943			2024-04-13 20:00:00	25	48	3.5	15.5	42.7	1.1	3		0.54		36.5304	52.751	6.745	2.966	54.331	0.89347	26.724	13.397	0.35751			2024-04-13 20:00:00	29	44	2.6	1.2	25
2024-04-13 21:00:00	28	54	4.6	10.3	38.3	0.95	6.2		0.35		49.9636	74.4758	5.94	3.749	65.277	1.44451	8.205	17.297	0.34563			2024-04-13 21:00:00	30	49	4.8	16.6	39	1.01	2.4		0.52		40.5313	58.3135	5.575	2.824	54.25	0.92955	21.797	14.666	0.37647			2024-04-13 21:00:00	26	46	2.4	0.9	23.3
2024-04-13 22:00:00	26	54	4.7	21.2	40.7	1.11	1.9		0.39		52.2476	78.8552	5.926	4.391	67.048	1.50489	3.611	18.528	0.37758			2024-04-13 22:00:00	30	65	5.4	17.8	40	1.21	2.4		0.54		44.2077	63.4971	4.977	1.847	48.217	0.85469	25.497	15.085	0.36497			2024-04-13 22:00:00	26	59	2.6	3.2	30.2
2024-04-13 23:00:00	23	55	4.5	25.9	37.3	1.17	1.7		0.41		54.7009	81.9236	4.642	2.316	61.083	1.47622	4.707	20.76	0.37468			2024-04-13 23:00:00	28	67	3.3	10.7	38.3	1.09	2.9		0.46		53.3775	77.5248	3.524	1.172	45.583	0.90515	20.24	19.676	0.38907			2024-04-13 23:00:00	19	37	3.4	1.2	21.4
2024-04-14	21	51	2.3	3.8	31.5	0.77	4.5		0.28		59.4793	87.3886	3.616	0.733	50.996	1.30756	8.986	20.85	0.32976			2024-04-14	25	45	2.4	4.6	34.8	0.87	4.2		0.38		57.8633	85.436	3.009	0.499	42.859	0.90274	17.805	20.632	0.3801			2024-04-14	24	33	2.4	0.2	13.8
2024-04-14 01:00:00	22	56	1.8	3.7	29.3	0.77	2		0.27		60.1982	91.8548	2.382	0.37	36.515	0.96071	15.977	17.491	0.27521			2024-04-14 01:00:00	22		2.8	3.5	26.5	0.72	11.2		0.39		56.2929	84.2274	2.107	0.336	32.23	0.72681	22.566	14.355	0.31069			2024-04-14 01:00:00	11	27	2	1	12.2
2024-04-14 02:00:00	19	52	2.1	4.8	31.6	0.8	2.6		0.3		43.947	70.6187	1.145	0.314	27.182	0.74549	20.593	12.736	0.23123			2024-04-14 02:00:00	17		2.8			0.3	34.7		0.1		46.2735	70.0002	1.767	0.379	23.858	0.52389	24.833	11.39	0.21932			2024-04-14 02:00:00	9	20	1.6	1.1	12.5
2024-04-14 03:00:00	24	57	1.8	2.3	25.5	0.69	5.4		0.27		29.4054	46.8249	0.439	0.421	17.135	0.50844	28.584	11.788	0.1437			2024-04-14 03:00:00	13		2.7		16.2	0.45	21.5		0.2		31.2353	48.3015	1.595	0.713	21.831	0.43479	22.596	10.272	0.17592			2024-04-14 03:00:00	9	17	1.7	1.1	10.6
2024-04-14 04:00:00	26	47	1.5	0.4	15.4	0.52	13.9		0.19		30.8188	46.7587	0.118	1.062	25.482	0.68144	18.869	17.176	0.17072			2024-04-14 04:00:00	13		2.7		17.6	0.48	16.3		0.24		24.3755	37.4069	1.176	1.426	22.087	0.4246	21.458	11.295	0.14291			2024-04-14 04:00:00	10	21	1.9	1	11.8
2024-04-14 05:00:00	27	49	1.2	0.2	14.1	0.5	18.1		0.19		32.7635	49.5408	0.129	3.099	31.863	0.79874	10.343	20.432	0.19223			2024-04-14 05:00:00	9		2.3		12.9	0.36	30.5		0.15		17.3201	27.3139	0.988	3.048	27.029	0.47315	16.935	12.475	0.12599			2024-04-14 05:00:00	9	23	2	0.7	13.6
2024-04-14 06:00:00	25	38	1.2	2.4	16.2	0.53	19.1		0.18		26.957	40.7739	2.084	4.058	34.54	0.77496	7.516	19.453	0.17195			2024-04-14 06:00:00	12		2.5		15.7	0.45	27		0.2		11.7484	19.2038	3.475	5.116	33.427	0.50762	12.837	12.178	0.11784			2024-04-14 06:00:00	3	27	2.9	2.4	20.8
2024-04-14 07:00:00	23	45	1.1	3.4	14.5	0.54	25		0.16		20.6258	30.5244	2.796	11.578	37.648	0.82263	5.12	19.597	0.17552			2024-04-14 07:00:00	18		2.4	1.6	19.4	0.55	27.2		0.23		8.40238	13.5961	3.63	7.768	35.838	0.53619	11.27	11.221	0.14994			2024-04-14 07:00:00	21	27	3.2	2.9	15.1
2024-04-14 08:00:00	26	36	1.1	5.6	21	0.62	26.6		0.16		17.7721	32.5225	1.578	13.812	27.773	0.74231	16.541	15.404	0.15232			2024-04-14 08:00:00	21		2.4	2.3	18.5	0.63	31.9				9.81771	16.2475	2.294	7.915	29.09	0.55024	17.766	10.678	0.17108			2024-04-14 08:00:00	33	30	3.2	2.7	15.3
2024-04-14 09:00:00	21	40	1.3	5.8	19.3	0.63	28.5		0.15		17.6324	34.6092	0.343	11.591	24.629	0.66302	24.471	14.925	0.18999			2024-04-14 09:00:00	22		2.6	1.8	17.8	0.6	35.4		0.2		11.7746	20.6259	0.928	6.23	12.718	0.3892	36.299	8.94	0.15327			2024-04-14 09:00:00	40		3.4	2.7	12.6
2024-04-14 10:00:00	21	37	1.3	7.5	19.1	0.58	40.7		0.12		17.3757	33.7768	0.342	10.742	18.694	0.596	36.104	13.085	0.18648			2024-04-14 10:00:00	22		2.5	2.4	14.6	0.55	45.1		0.17		14.0442	25.9239	3.577	5.276	11.016	0.37634	43.752	9.239	0.16531			2024-04-14 10:00:00	25	35	3.3	2.7	14.8
2024-04-14 11:00:00	21	37	1.2	2.9	15.5	0.46	53.5		0.11		11.1842	21.6049	0.992	2.817	6.846	0.32488	55.059	7.77	0.12527			2024-04-14 11:00:00	24		1.7	1.4	12.4	0.51	56.4		0.15		12.1504	23.2078	5.011	3.159	8.086	0.31922	55.592	7.81	0.15221			2024-04-14 11:00:00	16	26	3.2	3	13.5
2024-04-14 12:00:00	28	32	1	1.8	13.8	0.4	55.5		0.09		8.78017	16.9209	1.082	1.72	4.495	0.25356	58.313	6.045	0.09174			2024-04-14 12:00:00	21		2.5	1.2	11.7	0.43	56.8		0.13		10.3962	18.4334	4.168	1.595	4.925	0.24012	64.189	6.344	0.1221			2024-04-14 12:00:00	20	31	3.5	2.7	14.8
2024-04-14 13:00:00	20	28	0.5	1.9	11.5	0.36	52.1		0.08		8.42907	17.1987	0.777	1.224	7.419	0.27363	53.921	7.383	0.08561			2024-04-14 13:00:00	14	24	2.5	1.3	8	0.31	54		0.09		10.1796	17.6096	3.657	1.213	3.728	0.21803	62.378	5.288	0.08684			2024-04-14 13:00:00	16	26	1.9	2.2	10.4
2024-04-14 14:00:00	14	30	0.4	1.9	14.3	0.38	45.5		0.08		9.27919	18.5703	0.614	1.629	4.181	0.23764	52.785	6.416	0.07108			2024-04-14 14:00:00	14	21	2.5	1	7.8	0.29	50.7		0.08		9.37777	16.7906	2.068	1.057	3.107	0.209	56.514	4.893	0.07945			2024-04-14 14:00:00	14	25	1.6	1.5	10.4
2024-04-14 15:00:00	7	24	0.1	1.9	14.6	0.37	44.7		0.09		10.1551	20.1432	0.337	1.366	7.166	0.27798	50.635	7.26	0.08182			2024-04-14 15:00:00	14	19	2.6	0.7	11.9	0.37	46.8		0.12		12.385	20.8724	0.702	1.207	3.913	0.24869	56.451	6.251	0.09508			2024-04-14 15:00:00	9	20	1.8	1.7	10.2
2024-04-14 16:00:00	13	26	0.1	0.8	11.2	0.3	49.8		0.06		10.895	21.4934	0.255	2.528	8.716	0.31371	48.656	6.455	0.08114			2024-04-14 16:00:00	14	21	3.3	1.3	16.8	0.44	40		0.14		13.8452	22.9246	0.293	1.517	6.41	0.30743	55.676	9.06	0.12635			2024-04-14 16:00:00	13	26	1.8	1.4	14.1
2024-04-14 17:00:00	12	25	0.1	0.7	17.5	0.43	40.9		0.1		11.9261	24.5926	0.305	1.247	13.471	0.37069	44.563	7.227	0.1035			2024-04-14 17:00:00	16	23	2.7	0.9	15.8	0.47	41.5		0.15		14.7404	26.6502	3.365	0.86	10.77	0.32544	47.29	10.958	0.15055			2024-04-14 17:00:00	16	23	2	1.6	15.5
2024-04-14 18:00:00	19	23	0.3	1.6	17.5	0.44	42.8		0.08		12.283	27.1046	0.52	1.178	15.694	0.39753	42.2	8.406	0.09354			2024-04-14 18:00:00	15	16	2.7	0.5	11.3	0.43	44.5		0.12		13.811	25.4691	5.162	0.682	14.023	0.33847	42.318	10.665	0.13368			2024-04-14 18:00:00	13	23	2	1.3	13.5
2024-04-14 19:00:00	12	24	0.2	2.7	22.9	0.5	35.8		0.11		11.9701	28.3291	0.514	1.199	17.335	0.44969	41.386	9.719	0.10716			2024-04-14 19:00:00	10	16	2.4	0.5	16	0.47	37.4		0.14		13.2644	23.4996	4.806	0.624	12.329	0.34685	44.585	10.095	0.12098			2024-04-14 19:00:00	10	16	1.4	1.4	11.4
2024-04-14 20:00:00	8	15		0.9	18.5	0.43	39.6		0.09		10.7596	23.39	0.412	0.807	14.633	0.44326	43.353	9.847	0.09396			2024-04-14 20:00:00	13	21	2.2	0.8	19.8	0.52	30.5		0.16		13.241	23.3806	4.668	0.459	13.799	0.39885	43.232	11.887	0.13427			2024-04-14 20:00:00	9	21	1.4	1.3	13.6
2024-04-14 21:00:00	7	37	0.1	0.8	20.7	0.54	58.7		0.12		10.3726	21.54	0.175	0.667	10.722	0.37933	45.475	8.973	0.07869			2024-04-14 21:00:00	15	24	2.4	1	21.6	0.53	39.5		0.17		11.8924	20.797	2.193	0.35	10.435	0.34785	45.385	10.772	0.10587			2024-04-14 21:00:00	9	37	1.4	1.3	13.8
2024-04-14 22:00:00	16	55	0.5	0.8	21.6	0.56	57.5		0.11		9.45563	19.8947	0.125	0.609	9.955	0.35787	45.394	8.775	0.07327			2024-04-14 22:00:00	24	48	2.8	0.5	18.2	0.5	55.5		0.14		11.1798	20.1907	1.768	0.324	8.412	0.30928	46.37	10.544	0.09008			2024-04-14 22:00:00	19	61	2.4	1.1	16.1
2024-04-14 23:00:00	20	40	0.3	0.2	13.5	0.4	61.7		0.09		9.04834	18.1194	0.045	0.36	6.217	0.31089	48.736	8.216	0.05072			2024-04-14 23:00:00	33	51	4.5	0.5	16	0.45	51.7		0.13		10.0907	18.4566	0.193	0.208	6.247	0.28625	48.026	10.612	0.07367			2024-04-14 23:00:00	37	41	1.8	1.2	10
2024-04-15	19	37	2	0.2	11.2	0.33	61.7		0.08		14.8261	25.4774	0.035	0.078	2.132	0.23572	56.264	7.406	0.02818			2024-04-15	23	32	3.9	0.5	8.7	0.32	57.7		0.07		14.705	24.4455	0.059	0.038	2.277	0.22325	55.278	9.771	0.03837			2024-04-15	40	40	2.3	1	9.8
2024-04-15 01:00:00	14	38	1.6	0.3	8.5	0.26	62.4		0.07		22.9674	35.7389	0.119	0.067	1.784	0.25687	57.232	6.429	0.01496			2024-04-15 01:00:00	16	36	3.3	1.5	6.7	0.25	57.6		0.07		21.7134	33.5076	0.158	0.033	1.511	0.23913	57.361	9.139	0.02152			2024-04-15 01:00:00	27	39	2.1	0.4	7.3
2024-04-15 02:00:00	21	46	1.6		6.8	0.25	61.1		0.05		26.485	40.9056	0.269	0.109	2.371	0.29109	57.16	6.103	0.01518			2024-04-15 02:00:00	16	37	2.3	1.4	5.5	0.23	56.6		0.05		26.5817	40.1527	0.363	0.059	1.982	0.27016	56.44	8.577	0.02143			2024-04-15 02:00:00	18	37	2.2		6.5
2024-04-15 03:00:00	18	55	1.6	0.3	5.7	0.25	65.7		0.05		25.3187	40.6199	0.355	0.221	4.157	0.29502	56.709	6.912	0.01671			2024-04-15 03:00:00	17	45	2.8	1.2	5.4	0.23	54.4		0.04		27.4061	41.8279	0.521	0.128	3.471	0.2898	54.887	9.053	0.0305			2024-04-15 03:00:00	17	42	2.2	0.6	5.7
2024-04-15 04:00:00	22	55	1.5		5.9	0.28	67		0.06		25.6396	42.8674	0.396	0.481	9.115	0.35711	53.728	7.316	0.02517			2024-04-15 04:00:00	20	44	3.7	1.7	5.3	0.24	54.6		0.05		24.9175	38.4303	0.637	0.262	6.903	0.33559	52.901	9.912	0.03932			2024-04-15 04:00:00	20	45	2.5	0.1	6.7
2024-04-15 05:00:00	18	56	1.5		9.8	0.34	60.3		0.07		26.5346	46.5461	0.57	1.009	18.12	0.54147	48.339	8.728	0.04768			2024-04-15 05:00:00	18	50	2.8	1.3	7.5	0.27	52.7		0.06		23.2097	35.8398	0.708	0.475	11.544	0.41311	49.486	10.228	0.05081			2024-04-15 05:00:00	18	51	2.5	0.5	8.1
2024-04-15 06:00:00	21	58	1.7	1.6	24.2	0.5	46.3		0.1		26.635	45.8422	0.748	1.402	23.142	0.55464	45.526	9.135	0.06638			2024-04-15 06:00:00	18	47	2.7	2.1	16.5	0.35	46.3		0.07		23.6077	37.0829	4.953	0.709	16.251	0.43612	47.137	10.731	0.06652			2024-04-15 06:00:00	26	54	2.5	0.7	12.7
2024-04-15 07:00:00	21	62	1.8	5	33.6	0.81	39.1		0.16		25.0263	42.8932	0.874	2.177	19.525	0.44372	48.813	6.705	0.07833			2024-04-15 07:00:00	22	50	2.5	3.3	23.7	0.54	40.9		0.12		26.1343	41.3722	4.782	1.439	15.114	0.38691	49.598	8.835	0.09171			2024-04-15 07:00:00	28	55	2.5	2	18.7
2024-04-15 08:00:00	22	54	3.5	8.3	36.2	0.91	33.5		0.2		24.0341	39.3741	0.905	2.532	10.119	0.3468	55.69	4.64	0.05441			2024-04-15 08:00:00	26	51		3.5	27	0.6	39.7		0.15		24.0519	40.8219	2.247	1.9	8.175	0.31755	56.409	6.122	0.07519			2024-04-15 08:00:00	27	55	2.3	1.7	17.2
2024-04-15 09:00:00	25	51	3.5	6.8	33.6	0.66	34.3		0.16		26.1815	41.6168	1.699	1.975	9.366	0.38299	53.507	2.679	0.11687			2024-04-15 09:00:00	24	49	1.7	4.4	27.9	0.5	38.3		0.13		25.3736	43.7569	0.69	2.482	7.724	0.30382	57.037	3.092	0.08707			2024-04-15 09:00:00	26	55	2.5	1.8	17.2
2024-04-15 10:00:00	23	42	3.6	4.9	27.1	0.51	40.5		0.13		27.6503	43.2841	2.811	1.602	7.786	0.36995	51.973	1.982	0.10087			2024-04-15 10:00:00	21	51	2.5	4.4	23.1	0.42	40.9		0.11		28.2162	47.6745	3.107	2.72	8.949	0.31716	53.846	2.383	0.08649			2024-04-15 10:00:00	24	44	3.1	1.8	15.4
2024-04-15 11:00:00	21	51	4.4	4	24.9	0.48	43.4		0.12		27.7426	43.334	3.902	1.922	6.712	0.38941	50.492	1.54	0.09837			2024-04-15 11:00:00	18	49	3.2	3.5	21.6	0.41	43		0.12		28.9562	48.1154	4.905	3.104	9.007	0.3516	50.852	2.018	0.09577			2024-04-15 11:00:00	19	49	2.1	1.6	14.8
2024-04-15 12:00:00	18	58	4.3	4.4	24.5	0.47	43.9		0.1		29.1194	44.2162	3.693	2.076	5.546	0.40279	51.536	1.217	0.09814			2024-04-15 12:00:00	13	49	4.2	3.7	19.3	0.41	45.4		0.1		29.87	48.8361	3.727	2.399	6.523	0.36148	51.103	1.634	0.09369			2024-04-15 12:00:00	19	51	2.1	1.8	13.4
2024-04-15 13:00:00	17	56	3.4	4.2	22.2	0.46	50.2		0.09		28.8906	43.3529	3.5	1.665	6.974	0.41536	51.608	1.305	0.08345			2024-04-15 13:00:00	14	51	3.9	4.2	17	0.38	47.9		0.1		29.5668	47.1767	3.503	1.728	7.388	0.3722	50.002	1.283	0.0839			2024-04-15 13:00:00	16	37
2024-04-15 14:00:00	18	50	2.4	4.2	20.8	0.44	51.8		0.09		26.5776	40.5604	3.074	1.398	7.967	0.41206	48.512	1.551	0.1034			2024-04-15 14:00:00	17	52	3.8	3.6	16.2	0.37	50.6		0.1		27.4436	44.6383	2.237	2.122	5.839	0.36383	49.628	1.228	0.08137			2024-04-15 14:00:00	25	39	2.2	1	10.9
2024-04-15 15:00:00	21	55	2.5	3.7	24.6	0.47	47.7		0.11		24.9166	38.6659	1.688	1.387	7.81	0.39908	48.776	1.209	0.09804			2024-04-15 15:00:00	17	53	4.2	2.7	17.9	0.4	48.5		0.1		25.3615	42.928	1.071	1.667	7.809	0.36988	47.272	1.77	0.09273			2024-04-15 15:00:00	14	44	2.2	0.9	14.7
2024-04-15 16:00:00	20	55	3.3	3.4	28.2	0.5	42		0.11		23.3094	36.5246	1.667	2.221	7.918	0.38842	48.92	1.397	0.09928			2024-04-15 16:00:00	17	48	4.6	2.9	20.9	0.4	44.5		0.11		23.5672	40.3381	0.856	2.228	7.147	0.35454	48.487	1.99	0.09162			2024-04-15 16:00:00	18	71	2.2	1.4	17.4
2024-04-15 17:00:00	21	48	2.2	5.8	38.3	0.71	29.5		0.19		21.9677	34.6779	3.039	1.645	10.637	0.39241	46.483	2.01	0.11851			2024-04-15 17:00:00	15	37	10.9	3	23.3	0.52	39.9		0.15		22.3984	38.6533	3.497	2.384	11.347	0.34469	45.47	2.176	0.11324			2024-04-15 17:00:00	21	46	2.4	1.5	20
2024-04-15 18:00:00	19	42	2.5	7.8	42.3	0.84	24.9		0.21		22.6942	35.217	4.421	0.751	14.539	0.42532	41.377	2.473	0.11577			2024-04-15 18:00:00	16	36	14	2.5	23.4	0.54	40.9		0.14		22.7858	38.8215	5.21	1.271	14.835	0.34139	41.916	2.412	0.10894			2024-04-15 18:00:00	19	38	2.4	1.4	19.9
2024-04-15 19:00:00	19	37	2.6	6.5	39.6	0.73	25.5		0.18		22.9425	34.8608	4.199	0.861	15.483	0.44702	38.08	2.101	0.12143			2024-04-15 19:00:00	17	34	12.7	2.2	18.9	0.45	44.6		0.1		22.8567	37.0819	5.531	1.483	16.067	0.34792	38.337	2.437	0.11439			2024-04-15 19:00:00	21	40	2.5	1.2	15.5
2024-04-15 20:00:00	20	40	2.5	3.9	33	0.58	29.6		0.14		20.5693	31.1018	3.492	0.813	15.509	0.49916	37.399	3.08	0.13042			2024-04-15 20:00:00	13	34	12.8	1.9	15.5	0.38	47.2		0.08		20.78	33.0679	4.192	1.064	12.887	0.35031	40.648	2.757	0.10182			2024-04-15 20:00:00	14	40	2.2	0.8	13.4
2024-04-15 21:00:00	19	36	2.2	2.3	27.2	0.53	35.9		0.12		14.7458	22.4724	2.276	0.57	11.93	0.43688	40.039	3.545	0.11634			2024-04-15 21:00:00	12	37	10.3	2.1	12.9	0.35	48.8		0.07		16.073	26.3032	2.732	0.816	11.546	0.33706	40.887	3.904	0.09996			2024-04-15 21:00:00	19	34	2.1	0.7	13.8
2024-04-15 22:00:00	21	30	2	1.9	24.3	0.48	39.5		0.1		14.7224	22.1347	1.927	0.368	8.89	0.37861	43.286	3.747	0.10589			2024-04-15 22:00:00	13	45	6.8	3.6	20	0.37	40.4		0.1		13.9164	22.2275	2.6	0.616	10.26	0.31515	41.487	4.831	0.09341			2024-04-15 22:00:00	11	33	2.4	0.8	12.2
2024-04-15 23:00:00	19	35	1.8	0.5	15.3	0.36	48.6		0.08		15.8103	23.1806	0.931	0.136	4.634	0.30249	46.886	3.475	0.06832			2024-04-15 23:00:00	15	34	6	4.4	19.9	0.34	38.4		0.08		14.6478	22.0156	0.726	0.255	6.406	0.2856	44.858	4.946	0.07635			2024-04-15 23:00:00	4	31	2.3	0.5	10.7
2024-04-16	21	24	1.4	0.3	9.9	0.33	53.8		0.07		15.1131	21.1706	0.594	0.094	3.936	0.28062	47.819	5.117	0.05646			2024-04-16	15	31	1.5	4.5	19	0.32	38.2		0.09		14.9529	21.5701	0.387	0.157	4.689	0.25622	46.5	6.064	0.05271			2024-04-16	3	39	3	0.5	9.2
2024-04-16 01:00:00	17	30	1.6	0.4	9.7	0.33	51.1		0.07		15.8804	22.2322	0.676	0.099	4.229	0.26145	46.749	6.109	0.02795			2024-04-16 01:00:00	12	29	0.2	2.6	18	0.3	37.9		0.1		15.1295	22.3425	0.289	0.176	4.799	0.24742	45.677	7.21	0.03515			2024-04-16 01:00:00	5	21	2.3	0.7	11.2
2024-04-16 02:00:00	17	28	1.9	0.3	9.3	0.28	46.7		0.08		17.829	28.5237	0.706	0.137	5.948	0.28053	44.07	8.289	0.0283			2024-04-16 02:00:00	11	34	0.5	1.8	16.4	0.3	36.1		0.1		15.7505	25.1018	0.245	0.234	6.291	0.25429	43.454	10.781	0.03844			2024-04-16 02:00:00	14	31	2.6	0.9	18.9
2024-04-16 03:00:00	16	33	2.4	0.3	12.7	0.34	40.9		0.11		18.5815	31.4427	0.591	0.337	10.046	0.34665	41.232	11.075	0.04039			2024-04-16 03:00:00	12	30	1.3	0.5	12.7	0.33	32.7		0.13		15.6314	25.7056	0.248	0.594	10.073	0.27853	39.91	14.115	0.05695			2024-04-16 03:00:00	12	30	3.2	0.7	14
2024-04-16 04:00:00	19	27	1.8	0.2	9.4	0.28	42.6		0.1		18.5386	30.9503	0.607	0.825	17.287	0.46456	35.145	11.661	0.06266			2024-04-16 04:00:00	14	36	1.6	0.7	15.1	0.35	22.2		0.16		15.3116	26.3418	0.441	1.722	22.871	0.37987	29.23	18.634	0.08688			2024-04-16 04:00:00	17	35	3.2	0.7	15.1
2024-04-16 05:00:00	12	27	1.6	0.2	11.5	0.33	32.3		0.14		18.7327	30.7134	0.49	1.832	31.02	0.81675	25.224	14.415	0.12655			2024-04-16 05:00:00	15	34	0.4	0.9	18.2	0.38	20.6		0.17		15.8331	27.1744	1.718	4.99	43.456	0.60566	13.94	19.939	0.13841			2024-04-16 05:00:00	11	28	2.5	0.5	13.5
2024-04-16 06:00:00	11	18	1.6	1.1	15.1	0.39	27.7		0.14		17.9052	29.5037	3.867	4.921	50.85	1.06969	9.628	18.807	0.22529			2024-04-16 06:00:00	17	31	1.9	2.4	25.9	0.5	16.4		0.19		10.606	17.4282	8.265	7.333	44.05	0.58418	11.341	12.578	0.15547			2024-04-16 06:00:00	12	31	2.5	2.2	21
2024-04-16 07:00:00	10	23	2	17.9	27.3	0.94	19.4		0.24		14.9509	23.8746	6.154	7.48	51.378	0.99494	10.428	15.522	0.30888			2024-04-16 07:00:00	15	25	3.3	4.7	31.4	0.76	12.9		0.3		15.5411	26.2616	8.906	9.516	42.944	0.55242	11.059	10.229	0.20097			2024-04-16 07:00:00	17	36	2.7	9.9	34.4
2024-04-16 08:00:00	11	26	3.1	27.2	41.4	1.34	10.1		0.36		9.71331	18.2212	3.047	9.281	48.428	0.8872	9.289	8.577	0.34188			2024-04-16 08:00:00	13	23	3.5	6.1	35.1	1.04	13.4		0.37		10.3583	17.6974	2.858	8.155	41.143	0.54359	9.322	4.89	0.23108			2024-04-16 08:00:00	21	36	3.6	11.7	41.3
2024-04-16 09:00:00	17	40	3.7	31.4	44.9	1.31	10.2		0.39		6.67948	17.7286	0	39.594	51.133	1.27347	1.281	11.706	0.51421			2024-04-16 09:00:00	17	32	2.3	14.3	43.4	1.18	9.6		0.44		9.98717	19.0979	0	5.711	32.063	0.81555	14.35	10.85	0.43063			2024-04-16 09:00:00	26	34	3.1	5	34.6
2024-04-16 10:00:00	19	41	4.1	32.3	49.9	1.31	8.8		0.49		31.4505	61.3192	4.439	42.135	46.653	1.253	5.203	13.704	0.5399			2024-04-16 10:00:00	23	38	3.8	17.7	44.4	0.96	8.8		0.53		13.3991	31.3759	3.946	8.292	36.673	0.75776	9.89	7.786	0.39549			2024-04-16 10:00:00	18	30	2.6	6.2	35.5
2024-04-16 11:00:00	28	44	4.6	18	48	1.04	12.5		0.52		31.7087	63.5499	2.996	38.653	40.409	1.1463	6.673	1.609	0.54047			2024-04-16 11:00:00	23	27	3.8	9.5	40.5	0.73	9.3		0.55		12.541	29.8986	4.671	3.343	21.03	0.5781	29.613	2.132	0.32165			2024-04-16 11:00:00	17	32	3.5	5.1	37.7
2024-04-16 12:00:00	20	33	3.5	11.1	34.5	0.74	29		0.27		17.9933	37.637	1.742	14.06	37.796	0.86848	10.857	3.49	0.43483			2024-04-16 12:00:00	18	27	2.9	9	37	0.67	12.7		0.51		12.5476	38.1471	5.935	2.818	19.43	0.53741	32.676	7.51	0.32724			2024-04-16 12:00:00	9	10	3.3	3.7	28.5
2024-04-16 13:00:00	20	36	3.2	17.3	39.4	0.81	23.8		0.26		19.0859	43.3159	4.404	9.089	19.41	0.55173	31.621	8.275	0.23389			2024-04-16 13:00:00	14	20	2.8	6.1	33.7	0.58	18.6		0.4		16.3618	31.9681	5.208	2.831	16.376	0.50168	38.077	7.589	0.27502			2024-04-16 13:00:00	19	12	2	1.9	24.4
2024-04-16 14:00:00	12	31	3	13.2	36.6	0.75	28.3		0.25		16.5751	33.45	0.751	3.888	24.935	0.57808	27.625	4.709	0.24645			2024-04-16 14:00:00	9	19	2	1.7	20.5	0.35	37.3		0.17		13.456	24.3985	0.437	1.035	16.886	0.52644	36.997	3.486	0.30432			2024-04-16 14:00:00	14	11	2.1	1.7	21.3
2024-04-16 15:00:00	17	38	3.1	17.8	39.2	0.79	26.4		0.26		17.2956	33.0495	0.885	5.946	17.272	0.54626	40.416	7.176	0.20488			2024-04-16 15:00:00	9	21	2	1.6	24.4	0.39	33.7		0.22		20.4853	45.53	0.398	1.446	15.882	0.52776	43.863	7.559	0.27829			2024-04-16 15:00:00	14	11	2.8	1.5	21.6
2024-04-16 16:00:00	18	44	3.1	11.3	39.6	0.73	27.6		0.25		14.5366	32.5906	0.648	4.338	19.355	0.54507	33.618	6.927	0.19084			2024-04-16 16:00:00	13	27	2.2	1.4	24.1	0.42	35.7		0.22		22.7804	57.7805	0.665	0.809	15.959	0.4942	42.265	6.863	0.25121			2024-04-16 16:00:00	9	47	2.3	1.8	26.2
2024-04-16 17:00:00	24	65	3.3	16.9	46.9	1.03	24.7		0.3		15.2779	36.4799	3.542	4.445	22.25	0.57615	29.885	6.535	0.20397			2024-04-16 17:00:00	17	44	2.3	1.3	25.4	0.55	37.8		0.26		19.6021	41.7339	2.246	1.094	18.973	0.50575	34.98	0.924	0.28931			2024-04-16 17:00:00	18	53	2.4	1.5	24.8
2024-04-16 18:00:00	27	65	3.4	14.1	43.2	1.12	28.3		0.3		17.2931	47.2209	6.439	4.938	27.95	0.69515	26.402	7.61	0.1942			2024-04-16 18:00:00	24	54	2.7	1.2	29	0.69	33.2		0.27		24.9806	58.2029	4.503	1.124	19.631	0.56045	32.331	0.432	0.2763			2024-04-16 18:00:00	28	63	2.6	1.2	30.3
2024-04-16 19:00:00	35	58	3.4	11.4	42	1.01	26.2		0.28		23.6209	58.3474	7.963	5.927	32.584	0.84818	22.627	8.878	0.23698			2024-04-16 19:00:00	28	64	4.1	1.3	33.6	0.81	26.8		0.35		20.8547	54.1419	10.049	1.072	22.412	0.61213	33.839	7.153	0.28795			2024-04-16 19:00:00	37	52	2.8	0.7	21.3
2024-04-16 20:00:00	36	58	3.7	14.5	43.3	1.04	22		0.3		25.6702	61.5124	7.152	5.754	34.99	1.00912	20.209	10.465	0.26359			2024-04-16 20:00:00	31	77	6.8	1.2	33.7	0.75	21.3		0.37		23.6888	55.4164	9.25	0.812	23.026	0.64093	32.012	9.75	0.2869			2024-04-16 20:00:00	42	67	3.7	1.1	24.1
2024-04-16 21:00:00	32	43	3.2	4	30.1	0.73	36		0.21		24.457	56.7684	4.691	4.344	32.059	0.93681	22.497	11.177	0.26268			2024-04-16 21:00:00	33	65	4.9	2	27.6	0.6	28.4		0.32		26.7952	57.9888	6.599	0.659	22.437	0.64438	31.443	11.975	0.311			2024-04-16 21:00:00	44	52	4.6	1.4	28.5
2024-04-16 22:00:00	23	49	3.3	5.1	31.3	0.86	32.2		0.27		21.6704	50.0395	4.036	2.265	23.786	0.72679	29.835	11.266	0.22564			2024-04-16 22:00:00	27	43	3.5	1.1	24.6	0.6	29.1		0.23		28.0844	54.6889	6.714	0.463	19.607	0.54935	32.36	13.266	0.29583			2024-04-16 22:00:00	34	46	3.3	0.9	31.5
2024-04-16 23:00:00	27	44	3	3.4	28.2	0.73	33.8		0.18		19.8091	43.2661	1.331	0.675	13.97	0.55897	38.745	11.922	0.16906			2024-04-16 23:00:00	23	48	3.4	0.8	19.4	0.48	33		0.19		28.4977	53.1256	3.06	0.144	12.954	0.41024	36.062	12.392	0.23111			2024-04-16 23:00:00	36	44	3.7	1.2	29.1
2024-04-17	22	37	1.6	0.7	14.8	0.49	46.4		0.13		15.4607	32.1218	0.388	0.421	7.662	0.31977	44.603	11.037	0.09013			2024-04-17	21	38	2.5	0.4	14.9	0.37	35.3		0.13		22.1944	40.7743	1.907	0.092	9.158	0.29517	39.582	11.347	0.14651			2024-04-17	26	40	6.5	0.9	23
2024-04-17 01:00:00	22	38	1	1.7	13	0.39	47.3		0.12		13.449	25.2248	0.134	0.387	5.82	0.25193	46.649	10.403	0.02544			2024-04-17 01:00:00	14	41	3.1		12.8	0.33	36.6		0.12		17.1843	31.5108	1.028	0.082	5.635	0.22295	45.241	11.32	0.05371			2024-04-17 01:00:00	24	39	3.7	0.9	19.4
2024-04-17 02:00:00	12	32	0.9	2	12.1	0.36	46.8		0.1		16.7598	27.9551	0.139	0.41	6.397	0.26874	47.571	10.245	0.01839			2024-04-17 02:00:00	20	53	4.4	0.3	16.2	0.39	26.6		0.23		14.8537	25.8171	0.343	0.091	4.38	0.22647	47.503	10.656	0.0299			2024-04-17 02:00:00	9	39	3.5	1.2	18.1
2024-04-17 03:00:00	14	27	1	1.9	10.9	0.3	45.4		0.11		22.358	35.3234	0.324	0.791	11.641	0.36147	45.595	11.353	0.029			2024-04-17 03:00:00	29	62	5.5	0.2	18.1	0.39	20.6		0.23		18.7129	29.5111	0.37	0.17	6.137	0.28752	48.08	11.702	0.04886			2024-04-17 03:00:00	14	40	4.2	1.4	14.9
2024-04-17 04:00:00	14	32	1.4	2.3	14.8	0.41	39.2		0.14		27.0979	42.4755	0.616	2.379	23.076	0.61184	34.347	12.713	0.05702			2024-04-17 04:00:00	29	58	5.2	0.1	15.7	0.37	24.2		0.24		25.0274	35.202	0.735	0.362	10.251	0.45089	47.356	10.881	0.06462			2024-04-17 04:00:00	20	41	2.8	0.8	17.6
2024-04-17 05:00:00	16	30	1.5	1.5	14.1	0.38	36.4		0.14		28.272	46.2677	0.823	8.634	41.978	1.23134	16.169	14.448	0.12798			2024-04-17 05:00:00	30	50	6.7	0.1	18	0.41	22.5		0.24		22.7776	31.167	1.004	0.672	16.331	0.768	43.723	10.789	0.09714			2024-04-17 05:00:00	25	41	2.7	1.3	21.4
2024-04-17 06:00:00	21	45	2.1	2.8	23	0.53	25		0.25		19.3951	32.8391	7.013	12.978	47.697	1.31554	11.481	15.059	0.17909			2024-04-17 06:00:00	31	45	7.4	2.3	27.1	0.52	14.7		0.27		18.8123	26.5219	8.024	1.177	21.899	0.85082	38.642	10.397	0.13332			2024-04-17 06:00:00	24	41	4	2	23.2
2024-04-17 07:00:00	21	42	2.6	12.1	28.7	0.87	24.5		0.29		15.1951	27.7215	5.365	7.979	27.634	0.77227	31.316	8.893	0.15259			2024-04-17 07:00:00	37	62	8	5.8	31.1	0.8	16.3		0.32		17.5739	26.5076	7.761	2.144	18.773	0.71529	43.173	8.714	0.16994			2024-04-17 07:00:00	27	49	4.2	5	24.4
2024-04-17 08:00:00	22	38	2.7	11.4	30.9	1	33.4		0.28		12.7571	23.8408	2.798	6.688	16.911	0.60242	42.778	7.187	0.12897			2024-04-17 08:00:00	32	34	6	3.4	21.2	0.71	34.9		0.2		14.9406	28.4024	4.47	3.489	13.602	0.62545	49.612	7.233	0.17008			2024-04-17 08:00:00	19	30	4.7	5.5	22.4
2024-04-17 09:00:00	21	46	3.1	17.1	39.2	1.13	35.6		0.3		11.9615	21.3198	1.124	2.944	8.157	0.46385	56.378	3.404	0.13218			2024-04-17 09:00:00	17	25	3.8	2.9	17.2	0.59	46.7		0.16		13.2946	30.1291	1.853	3.596	13.247	0.49271	51.217	3.526	0.15625			2024-04-17 09:00:00	17	21	4.4	4.6	15.7
2024-04-17 10:00:00	21	41	2.7	7	26.4	0.77	57.6		0.19		13.3281	22.9785	1.912	2.447	6.686	0.42903	61.523	2.428	0.1168			2024-04-17 10:00:00	8	23	2.6	1.3	10.4	0.44	56.1		0.12		13.1203	28.907	3.81	2.998	7.98	0.40777	60.019	2.15	0.10668			2024-04-17 10:00:00
2024-04-17 11:00:00	23	32	1.9	3.5	17.7	0.59	70.5		0.14		15.8621	27.3168	2.906	2.327	6.26	0.42022	64.153	2.136	0.11847			2024-04-17 11:00:00	7	25	2.6	1.2	10.7	0.4	63		0.12		14.2779	29.3025	5.875	2.678	7.056	0.40965	65.23	1.753	0.10883			2024-04-17 11:00:00	5	20	3.4	3	13.2
2024-04-17 12:00:00	23	34	1.3	4.6	20.5	0.54	62.8		0.13		14.2197	26.4816	2.992	1.724	7.715	0.43664	65.916	2.443	0.13911			2024-04-17 12:00:00	8	29	3	0.8	12.5	0.45	69.6		0.14		14.8665	30.8025	5.094	2.104	7.158	0.40467	67.857	1.901	0.12183			2024-04-17 12:00:00	5	18	3.9	3	14.8
2024-04-17 13:00:00	21	34	1	5	20.1	0.51	59.1		0.12		11.3541	20.2278	2.367	1.82	6.62	0.4182	66.299	2.122	0.10118			2024-04-17 13:00:00	12	33	2.5	1.4	16.1	0.5	69.5		0.13		13.7874	27.0351	5.073	1.891	8.472	0.40477	67.073	1.951	0.11179			2024-04-17 13:00:00	6	29	3.8	2.6	12.8
2024-04-17 14:00:00	20	51	0.9	4.7	19.6	0.48	61.7		0.12		11.1074	19.1872	1.419	1.793	5.454	0.3905	65.171	1.689	0.09318			2024-04-17 14:00:00	15	35	2.3	1.9	17.7	0.47	65.7		0.12		13.5423	25.3871	2.818	1.761	7.605	0.40243	68.728	2.125	0.11376			2024-04-17 14:00:00	14	29	4.1	2.9	15.4
2024-04-17 15:00:00	16	48	0.9	5.6	23.5	0.54	56.2		0.13		12.5699	22.5953	0.831	1.697	5.868	0.39566	66.23	1.597	0.09006			2024-04-17 15:00:00	11	46	2.5	2.3	20.8	0.49	59.9		0.14		15.0992	30.1754	0.964	1.607	7.601	0.42486	71.339	2.806	0.13253			2024-04-17 15:00:00	13	39	3.4	3	16
2024-04-17 16:00:00	15	37	0.7	4.8	24.8	0.58	52		0.15		13.4297	24.9532	0.994	1.836	7.782	0.42582	64.644	1.736	0.10358			2024-04-17 16:00:00	14	43	3.1	2.7	24.8	0.51	52.8		0.15		15.7896	32.2564	0.603	1.514	7.36	0.41205	70.091	2.801	0.13033			2024-04-17 16:00:00	16	46	2.3	2.3	14.9
2024-04-17 17:00:00	18	34	2.1	5.2	32.8	0.74	46.6		0.18		13.9507	27.2915	2.162	1.634	10.993	0.46373	59.387	1.978	0.12874			2024-04-17 17:00:00	17	37	5.7	1.4	27.4	0.63	48.7		0.18		15.9058	34.2064	4.394	1.616	11.98	0.43563	62.2	2.963	0.15659			2024-04-17 17:00:00	17	47	2.5	2	22.3
2024-04-17 18:00:00	22	37	8.5	8	47.3	0.92	30.8		0.23		14.8214	29.7325	4.243	0.617	16.587	0.52637	52.037	2.454	0.12569			2024-04-17 18:00:00	15	40	7.2	1.5	35.4	0.79	38.3		0.22		16.0138	35.3034	8.12	0.581	17.529	0.47568	52.935	3.359	0.16107			2024-04-17 18:00:00	21	49	4.2	1.9	31.7
2024-04-17 19:00:00	24	41	8.2	5.3	41.8	0.75	32.5		0.18		15.5975	30.1689	5.643	0.79	20.729	0.60917	45.902	2.921	0.15045			2024-04-17 19:00:00	17	40	6	0.8	27.1	0.65	42.8		0.17		13.453	27.9905	8.16	0.745	19.675	0.52146	46.323	3.471	0.17221			2024-04-17 19:00:00	24	52	4.7	1.9	27
2024-04-17 20:00:00	16	43	5.7	3.4	33.9	0.61	40.4		0.15		16.23	29.7785	3.679	0.755	22.793	0.73276	41.568	3.449	0.18136			2024-04-17 20:00:00	22	33	4.1	0.9	25.7	0.61	41.4		0.16		11.0921	22.2309	5.416	0.55	15.468	0.53095	45.938	3.745	0.17232			2024-04-17 20:00:00	20	41	3.6	1.3	23.8
2024-04-17 21:00:00	21	42	2.1	2.7	28.6	0.61	44.8		0.15		16.383	31.0212	2.468	0.585	20.701	0.7032	43.044	3.799	0.18575			2024-04-17 21:00:00	19	38	3.4	0.8	26.4	0.64	39.4		0.18		12.9425	25.5322	3.33	0.448	15.412	0.54748	44.87	4.55	0.18642			2024-04-17 21:00:00	17	39	4.1	1.2	19.5
2024-04-17 22:00:00	17	39	1.1	2.4	29.4	0.69	42.5		0.15		16.9638	36.9657	1.832	0.36	15.767	0.5902	46.931	4.142	0.1718			2024-04-17 22:00:00	17	39	3	0.3	23.9	0.63	39.6		0.16		13.8801	27.3217	3.241	0.347	14.207	0.52178	44.927	4.953	0.18184			2024-04-17 22:00:00	19	39	2.9	1.4	17.8
2024-04-17 23:00:00	20	35	1	2.2	21.9	0.57	48.5		0.13		17.4784	42.5673	0.646	0.151	11.05	0.55364	51.178	5.512	0.16123			2024-04-17 23:00:00	17	39	3.7	0.6	23.6	0.62	38		0.17		13.7226	31.1347	0.491	0.139	9.402	0.4492	48.059	5.513	0.16491			2024-04-17 23:00:00	24	37	2.4	1.7	20
2024-04-18	8	35	1.5	1.6	21.5	0.62	44.1		0.16		17.4409	42.2875	0.277	0.095	8.378	0.44401	53.051	7.389	0.12677			2024-04-18	18	32	3.3	0.4	21.6	0.58	37		0.17		12.9454	32.2455	0.129	0.075	6.183	0.36003	50.525	7.136	0.11971			2024-04-18	29	42	2.1	1.2	19.3
2024-04-18 01:00:00	14	36	1.5	0.5	25.3	0.72	36.8		0.17		16.8115	39.3045	0.306	0.095	8.227	0.38363	52.476	8.473	0.06843			2024-04-18 01:00:00	16	30	1.3	0.6	17.6	0.48	36.1		0.16		13.279	33.5539	0.113	0.091	6.887	0.34019	49.815	10.302	0.086			2024-04-18 01:00:00	21	40	3.6	0.9	18.9
2024-04-18 02:00:00	14	37	1.7	1	35.9	0.77	20.6		0.26		16.317	37.3549	0.301	0.112	8.867	0.37749	50.881	9.1	0.05302			2024-04-18 02:00:00	15	36	1.8	0.8	24.8	0.61	18.5		0.33		13.8277	31.6461	0.147	0.122	8.914	0.34959	47.235	12.705	0.07501			2024-04-18 02:00:00	18	37	3.8	0.9	17.2
2024-04-18 03:00:00	18	36	2.3	8.3	40.2	0.82	16.1		0.32		17.8941	41.8211	0.284	0.286	14.376	0.46114	44.993	11.487	0.06744			2024-04-18 03:00:00	17	39	4	1.7	34.2	0.62	5.9		0.38		16.0191	34.0104	0.22	0.285	13.271	0.39676	41.989	15.139	0.10326			2024-04-18 03:00:00	19	38	5.4	1	23.5
2024-04-18 04:00:00	14	33	2.1	1.8	17.1	0.47	31.2		0.15		22.4171	54.5309	0.342	1.854	39.974	1.01143	22.803	18.347	0.14761			2024-04-18 04:00:00	25	42	5.6	1.7	28.6	0.55	6.5		0.39		21.1178	46.329	0.445	1.274	32.138	0.67332	25.782	19.095	0.16179			2024-04-18 04:00:00	20	41	5.2	1.4	27.6
2024-04-18 05:00:00	11	30	2	0.6	17.3	0.52	19		0.24		23.5594	52.4538	0.518	8.893	60.821	1.86918	6.213	19.429	0.26997			2024-04-18 05:00:00	26	39	5.1	7.1	28.7	0.67	4.7		0.42		26.002	54.7896	1.148	8.661	59.32	1.28149	4.48	21.121	0.2526			2024-04-18 05:00:00	16	67	5	2.4	29
2024-04-18 06:00:00	10	37	2.5	5.7	23.3	0.7	14.9		0.3		24.0377	47.8377	4.38	15.391	60.459	1.7987	5.979	16.196	0.30602			2024-04-18 06:00:00	24	46	5.1	21.3	31.9	0.87	5.1		0.46		27.9882	54.7308	14.59	23.462	64.788	1.44227	3.107	17.42	0.29047			2024-04-18 06:00:00	32	82	5	4	23.5
2024-04-18 07:00:00	14	28	2.8	15.6	23.4	0.91	16.9		0.23		23.3913	46.6906	5.017	18.12	44.167	1.31492	20.529	10.628	0.32332			2024-04-18 07:00:00	30	53	5.6	19	41.3	1.16	12		0.53		27.3552	54.0935	16.362	25.943	52.546	1.21657	16.338	11.865	0.32413			2024-04-18 07:00:00	46	82	4.9	4.7	24.6
2024-04-18 08:00:00	21	59	4.6	20.9	35.6	1.37	24.8		0.35		26.2652	52.3455	3.969	13.114	33.049	1.00987	35.165	8.034	0.28733			2024-04-18 08:00:00	38	63	5.3	9.6	36.1	1.12	30.2		0.42		25.0607	50.2095	9.836	16.631	38.359	0.94704	32.494	8.306	0.29693			2024-04-18 08:00:00	50	69	3.9	2.8	16.8
2024-04-18 09:00:00	27	73	5.3	7.9	32.5	1.09	54		0.3		28.7103	55.3869	2.91	10.201	26.839	0.81951	46.314	6.918	0.25828			2024-04-18 09:00:00	36	61	4.5	2.9	20.8	0.69	52.7		0.24		24.8761	47.1709	2.415	6.495	19.243	0.66802	53.038	6	0.26301			2024-04-18 09:00:00	38	52	4	3.1	15.9
2024-04-18 10:00:00	33	67	5	4.2	34.1	0.94	75.2		0.27		32.6254	57.257	2.732	4.234	14.147	0.57275	65.969	5.088	0.1928			2024-04-18 10:00:00	35			1.9	18	0.6	70		0.24		30.3575	55.8461	2.918	2.971	10.282	0.46803	68.084	4.685	0.17622			2024-04-18 10:00:00	36	48	4.1	2.1	15
2024-04-18 11:00:00							94				40.0875	64.3499	3.664	2.434	10.032	0.50717	83.107	4.869	0.17637			2024-04-18 11:00:00			4	1	14.1	0.49	75.1		0.18		35.1386	64.4607	3.939	1.644	6.955	0.43301	83.32	4.527	0.172			2024-04-18 11:00:00	42	51	4.1	1.3	11.1
2024-04-18 12:00:00	43	61	3.3	1.5	24.6	0.67	97.2		0.21		40.0947	60.8476	3.698	1.547	7.649	0.52004	96.595	3.45	0.17379			2024-04-18 12:00:00	21	38	3.8	0.5	13.4	0.49	85.5		0.17		41.4624	70.2586	3.951	1.243	6.314	0.46321	96.252	4.115	0.19319			2024-04-18 12:00:00	40	51	4.2	1.1	10.5
2024-04-18 13:00:00	40	57	3.2	2	27.2	0.7	87.1		0.18		29.5664	46.9322	3.555	1.182	5.702	0.44489	92.17	2.892	0.11582			2024-04-18 13:00:00	25	55	3.8	1	19.3	0.59	81.3		0.21		39.0688	60.4447	4.583	1.304	7.306	0.47811	103.122	2.842	0.16426			2024-04-18 13:00:00	34	44	4	1.2	10.9
2024-04-18 14:00:00	41	66	4.7	2.7	28.6	0.73	89.4		0.21		18.4842	29.9212	2.165	1.185	5.178	0.39915	80.683	2.507	0.1			2024-04-18 14:00:00	31	69	3.9	1.4	19.4	0.48	84.8		0.2		14.2796	21.8767	3.611	1.292	7.603	0.44613	89.451	2.31	0.14291			2024-04-18 14:00:00	29	43	3.6	1.5	10.6
2024-04-18 15:00:00	37	66	5.8	3	34.1	0.81	84.5		0.22		12.4973	23.6624	0.66	0.506	10.695	0.48007	71.861	1.609	0.14447			2024-04-18 15:00:00	35	63	4.4	1	19.4	0.49	91.1		0.18		12.7164	26.2143	0	0.336	13.059	0.56221	77.098	2.674	0.24421			2024-04-18 15:00:00	32	33	3.6	1.4	13.7
2024-04-18 16:00:00	34	51	4.7	6	42.1	0.95	59.6		0.28		9.04257	21.8403	0.485	1.244	10.148	0.47592	60.824	3.041	0.13803			2024-04-18 16:00:00	32	57	5.6	1	25.4	0.62	70.2		0.27		11.9158	31.6095	0	0.835	13.784	0.55278	64.453	3.677	0.23426			2024-04-18 16:00:00	29	58	4.9	1.3	18.7
2024-04-18 17:00:00	27	45	3.8	9.3	51.5	1.31	37.2		0.35		16.0354	38.5318	0.913	0.871	17.761	0.60442	54.417	2.13	0.20993			2024-04-18 17:00:00	25	52	6.6	1.5	34.2	0.85	51.3		0.33		17.259	51.752	3.346	1.791	15.393	0.53941	60.576	4.123	0.25443			2024-04-18 17:00:00	37	52	5	1.5	21.1
2024-04-18 18:00:00	28	40	4.1	13.7	52.9	1.33	26.3		0.36		20.6334	53.6249	5.216	0.721	19.227	0.60406	49.946	4.684	0.17567			2024-04-18 18:00:00	24	48	6.6	1.2	42.9	1.14	41.7		0.41		25.9254	76.1375	7.731	0.685	26.212	0.71017	49.843	6.294	0.30678			2024-04-18 18:00:00	38	56	5.2	0.9	31.1
2024-04-18 19:00:00	30	42	3.6	11.9	48.9	1.14	15.5		0.31		20.9047	59.9999	6.599	1.318	25.778	0.73987	35.021	6.186	0.20489			2024-04-18 19:00:00	22	48	5.9	1.4	40.3	1.21	32		0.4		25.3373	67.7794	10.105	0.995	31.59	0.84769	38.33	9.775	0.37782			2024-04-18 19:00:00	35	70	5.6	1.9	48.2
2024-04-18 20:00:00	32	45	3	9.6	46.5	0.96	13.9		0.26		17.7753	51.5007	5.04	1.569	24.675	0.86451	28.532	8.239	0.22765			2024-04-18 20:00:00	19	40	4.8	2.4	37.7	0.87	23.3		0.35		16.1016	41.2925	7.034	1.005	22.484	0.7027	33.155	10.322	0.34388			2024-04-18 20:00:00	29	75	6.6	2.2	49.2
2024-04-18 21:00:00	29	46	3.1	10.9	44.7	0.97	13.9		0.24		16.987	51.0553	3.358	1.263	22.172	0.81795	29.366	9.072	0.22775			2024-04-18 21:00:00	17	39	4.6	2.1	37.7	0.96	18.5		0.32		14.5534	40.1251	3.707	0.744	15.878	0.58541	36.142	9.285	0.29124			2024-04-18 21:00:00	29	70	10.1	7.1	55.7
2024-04-18 22:00:00	24	37	3	11.8	45.2	1.06	12.2		0.26		14.1547	44.4832	2.85	0.747	17.581	0.68991	31.822	9.92	0.2167			2024-04-18 22:00:00	17	48	5.8	28.7	46.9	1.54	11.6		0.62		14.68	43.2594	4.074	0.622	16.579	0.57285	33.675	10.938	0.31248			2024-04-18 22:00:00	44	60	7.3	8.7	48.7
2024-04-18 23:00:00	22	44	2.9	8.3	45.1	1.01	8.5		0.25		9.62486	32.1416	0.772	0.266	10.253	0.52553	37.708	9.632	0.15553			2024-04-18 23:00:00	22	60	8	14.1	49.2	1.23	3.3		0.7		10.611	33.3661	0.705	0.197	9.131	0.44368	39.494	9.977	0.23639			2024-04-18 23:00:00	44	61	8.1	2	39.5
2024-04-19	16	42	1.7	2.1	35.8	0.86	12.6		0.27		7.21907	24.4981	0.152	0.171	6.428	0.37094	39.887	9.912	0.10199			2024-04-19	24	52	4.8	7.9	44.4	1.06	4.3		0.71		9.18492	27.1267	0.129	0.123	5.749	0.33339	41.55	11.479	0.1385			2024-04-19	44	59	4.8	1.7	27.2
2024-04-19 01:00:00	18	43	1.3	2.2	24.6	0.59	17.1		0.22		7.23558	22.829	0.097	0.197	6.006	0.31033	39.14	12.724	0.05885			2024-04-19 01:00:00	24	59	5.8	16	39.8	1.13	2.4		0.77		10.7994	28.0681	0.144	0.132	6.198	0.31242	39.242	15.421	0.09299			2024-04-19 01:00:00	35	50	3.2	0.5	23.4
2024-04-19 02:00:00	20	32	1.1	2.2	11.4	0.42	26.3		0.12		9.85794	27.7878	0.094	0.252	7.616	0.33307	36.333	18.043	0.05855			2024-04-19 02:00:00	24	54	6.1	6.2	30.7	0.73	4.1		0.5		14.6614	35.298	0.267	0.209	9.31	0.3635	34.935	20.941	0.10405			2024-04-19 02:00:00	29	42	2.3	0.9	15.4
2024-04-19 03:00:00	20	30	0.9	1.8	9.7	0.4	24.6		0.13		13.8172	35.5432	0.12	0.612	13.029	0.42199	30.091	23.856	0.07647			2024-04-19 03:00:00	25	46	5.5	3.3	24.4	0.57	6.5		0.39		19.1553	42.9126	0.386	0.608	16.488	0.49646	27.648	26.373	0.16365			2024-04-19 03:00:00	29	48	2.5	0.9	26.5
2024-04-19 04:00:00	19	32	0.8	1.7	9.1	0.37	23.5		0.13		23.0797	51.4084	0.215	3.511	32.035	0.82341	12.941	29.085	0.13579			2024-04-19 04:00:00	25	47	4.3	3.3	21.6	0.52	6.6		0.33		24.8007	51.2766	0.827	2.464	32.145	0.83558	15.009	29.014	0.23418			2024-04-19 04:00:00	29	46	2.8	0.7	27.6
2024-04-19 05:00:00	10	36	1	2.1	10.5	0.39	23.5		0.15		29.9944	59.725	0.418	23.846	49.104	1.73853	0.705	30.694	0.25589			2024-04-19 05:00:00	23	38	3.7	4.2	19.8	0.52	10.2		0.31		31.5795	59.9016	1.161	11.693	51.287	1.56759	2.727	29.766	0.32403			2024-04-19 05:00:00	28	34	2	1.1	16.2
2024-04-19 06:00:00	9	36	1.1	12.5	23.9	0.63	9.2		0.18		35.0142	64.3006	4.93	33.466	49.388	1.92751	2.2	26.388	0.32611			2024-04-19 06:00:00	21	32	2.2	8	24.6	0.6	13.5		0.3		34.8917	59.517	10.249	25.91	57.622	1.91131	3.076	25.831	0.39829			2024-04-19 06:00:00	21	37	2.1	1.6	15.4
2024-04-19 07:00:00	16	36	1.8	19.2	39.3	0.97	11.4		0.24		31.9427	63.9068	8.041	31.084	48.577	1.86123	5.471	24.328	0.40248			2024-04-19 07:00:00	15	35	2.3	11.6	31.3	1.08	11.2		0.32		29.6378	50.3882	10.007	13.739	43.92	1.2596	16.572	17.293	0.40023			2024-04-19 07:00:00	25	49	2.8	10.5	36.3
2024-04-19 08:00:00	23	44	2.3	23.9	42.9	1.39	14.1		0.36		35.0897	75.642	4.721	9.138	37.099	1.1339	21.416	14.089	0.2887			2024-04-19 08:00:00	19	49	3.6	14.2	40	1.33	15		0.5		34.5453	76.1617	5.977	4.797	31.677	0.94195	31.81	11.829	0.39004			2024-04-19 08:00:00	27	54	3.5	5.7	28.3
2024-04-19 09:00:00	32	65	5.1	27.6	49.6	1.6	17.5		0.5		42.9593	85.9253	2.553	14.45	29.067	1.05281	34.088	16.112	0.34418			2024-04-19 09:00:00	25	61	5.9	12.5	34.9	0.95	19.3		0.43		39.6863	87.8764	3.641	10.08	29.262	1.03227	40.261	14.739	0.44271			2024-04-19 09:00:00	35	56	4.6	5.5	27.7
2024-04-19 10:00:00									0.35		51.8434	100.709	4.339	10.167	25.126	0.84886	52.097	12.395	0.31811			2024-04-19 10:00:00	25	56	5.5	8.3	33.2	0.89	34.4		0.38		40.302	92.7155	7.105	7.406	22.156	0.78995	59.304	10.845	0.34261			2024-04-19 10:00:00	33	57	4.3	5.1	28.6
2024-04-19 11:00:00	29	64				0.95	49				72.85	138.416	7.407	7.967	25.271	0.90133	69.976	11.794	0.34897			2024-04-19 11:00:00	32	66	3.3	6.5	32.1	0.92	55.1		0.37		39.1583	85.0071	9.719	5.765	16.458	0.57638	66.928	8.982	0.28031			2024-04-19 11:00:00	30	54	5	4.2	27
2024-04-19 12:00:00	39	64				0.84	58.3		0.25		75.8908	137.066	8.246	4.296	22.154	0.95854	97.447	10.914	0.3842			2024-04-19 12:00:00	29	52	2	3.6	18.5	0.57	67.1		0.21		42.9343	93.1069	7.558	3.216	13.224	0.55258	76.28	8.959	0.27523			2024-04-19 12:00:00	35	49	4.8	2.5	20.8
2024-04-19 13:00:00	42	65	3.6	4.3	31.5	0.89	60.3		0.26		62.5157	94.7264	5.672	2.606	13.237	0.70033	104.638	7.737	0.2373			2024-04-19 13:00:00	26	62					59.1		0.21		51.99	96.8659	6.555	2.437	9.867	0.51419	88.896	8.161	0.2228			2024-04-19 13:00:00	33	57	4.9	1.2	20.7
2024-04-19 14:00:00	52	75	3.4	5.4	38	0.9	48.1		0.29		34.9784	60.2913	3.96	2.511	13.201	0.64692	92.378	7.015	0.19715			2024-04-19 14:00:00			2.5	3.6	29.2	0.65					60.1977	104.801	6.022	2.483	12.89	0.58266	100.856	7.858	0.25074			2024-04-19 14:00:00	43	76	5.1	1.6	32.4
2024-04-19 15:00:00	47	84	3.4	12.1	41.3	0.99	43.4		0.3		17.0475	41.9443	2.963	3.264	21.569	0.72693	56.253	8.435	0.21248			2024-04-19 15:00:00	39	64	3.8	3.1	25.7	0.6	53.2				26.9907	59.1028	2.222	1.051	21.755	0.77886	84.714	7.687	0.34003			2024-04-19 15:00:00	45	56	3.6	1.2	28.7
2024-04-19 16:00:00	49	102	2.9	8.7	43.6	0.94	39		0.33		24.4674	60.2075	2.031	6.575	21.884	0.72841	40.192	11.319	0.21665			2024-04-19 16:00:00	33	74		2.9	24.8	0.6	52.1		0.28		25.4391	74.3463	0.213	1.936	25.84	0.83963	58.189	14.371	0.44518			2024-04-19 16:00:00	46	69	4.1	1.4	31.3
2024-04-19 17:00:00	49	95	2.9	8.4	44.3	1.19	35.5		0.39		41.6835	95.1623	5.06	6.737	31.121	0.91886	33.428	13.692	0.30181			2024-04-19 17:00:00	35	78		2.9	32.4	0.84	39.9		0.41		33.4293	96.4055	7.31	4.483	33.653	0.87582	53.919	14.306	0.48977			2024-04-19 17:00:00	45	68	3.2	1.5	36.5
2024-04-19 18:00:00	51	87	3.4	15.6	52.8	1.61	21.6		0.5		69.0196	140.55	7.502	3.968	46.213	1.22553	29.053	12.614	0.37627			2024-04-19 18:00:00	32	66		3	31.8	0.9	34.2		0.49		54.2897	135.243	13.168	3.202	39.814	0.87897	38.423	10.679	0.43977			2024-04-19 18:00:00	45	71	3.2	1.7	37.4
2024-04-19 19:00:00	49	96	4.2	17.7	57.5	1.39	11.8		0.43		85.1366	163.3	8.453	5.129	47.934	1.43574	24.189	9.272	0.45239			2024-04-19 19:00:00	31	81		3.3	41	1.23	23.4		0.55		72.65	153.103	14.32	4.173	45.743	1.09667	31.1	9.307	0.53981			2024-04-19 19:00:00	54	82	3.8	1.6	41.2
2024-04-19 20:00:00	47	88	4.3	13.9	49.9	1.09	11.2		0.37		38.002	68.5552	1.045	3.747	36.728	1.24026	30.058	0.233	0.37672			2024-04-19 20:00:00	43	95	7.1	4.3	52.3	1.46	9.5		0.66		35.2532	66.7366	6.508	3.774	41.909	1.17439	29.208	0.493	0.53165			2024-04-19 20:00:00	67	82	3.2	2.6	48.8
2024-04-19 21:00:00	43	78	4.6	5.9	35.8	0.83	17.3		0.24		23.8485	61.4162	2.042	4.875	39.004	1.4601	19.62	9.595	0.3559			2024-04-19 21:00:00	55	113	10.2	6.3	48.1	1.4	7.1		0.87		35.4619	78.7211	7.077	4.133	44.087	1.25706	21.65	11.371	0.55353			2024-04-19 21:00:00	70	95	4.1	1.5	34.8
2024-04-19 22:00:00	40	76	3.7	9.6	36.1	1.07	14.1		0.29		37.9064	91.8557	6.762	3.878	37	1.26258	19.572	18.755	0.30721			2024-04-19 22:00:00	58	101	8.9	4.7	38.2	1.08	6.8		0.7		49.0867	96.497	6.853	3.612	40.59	1.25196	20.154	15.813	0.53942			2024-04-19 22:00:00	60	83	3.4	1.2	30.8
2024-04-19 23:00:00	35	73	3	11.5	38.8	1.11	4.8		0.34		51.3043	94.9336	5.173	1.859	32.307	1.22971	22.001	21.967	0.28729			2024-04-19 23:00:00	48	84	8.4	3.1	29.3	0.87	8.9		0.55		31.3931	60.0118	0	1.69	29.38	1.10228	23.263	14.886	0.47352			2024-04-19 23:00:00	44	62	2.5	0.9	29.1
2024-04-20	40	71	2.4	4.9	32.6	0.99	10.3		0.34		30.1767	54.7621	0	0.891	25.781	1.05758	23.127	24.036	0.27002			2024-04-20	40	74	6.7	3.1	25.3	0.79	10.6		0.44		13.1764	30.7225	0	0.61	19.882	0.83926	29.265	19.531	0.3061			2024-04-20	42	63	3.7	0.5	24.6
2024-04-20 01:00:00	48	87	3.3	3.9	33.4	1.04	7.2		0.38		16.1021	33.9032	0.021	0.768	19.164	0.83619	27.055	30.738	0.18843			2024-04-20 01:00:00	38	76	5.9	2.5	30	0.93	4.4		0.47		7.13473	19.5848	0	0.447	9.39	0.43198	40.772	22.41	0.14218			2024-04-20 01:00:00	41	63	3.1	0.8	19.1
2024-04-20 02:00:00	44	77	3.1	1.9	23.4	0.8	10.9		0.34		16.3465	32.6255	0.042	0.79	12.542	0.49454	32.742	21.956	0.09707			2024-04-20 02:00:00	39	82	6.6	2.3	27.6	0.85	6.6		0.47		8.14451	20.7078	0	0.598	8.659	0.36648	40.032	24.495	0.0962			2024-04-20 02:00:00	40	46	3.6	1	17.2
2024-04-20 03:00:00	42	69	2.7	1.2	18.3	0.67	13.5		0.28		15.8416	31.3672	0	1.869	18.623	0.57789	24.358	25.214	0.09078			2024-04-20 03:00:00	36	69	6.1	1	20.7	0.71	11.1		0.42		14.1563	29.9679	0.086	1.444	14.771	0.4975	29.095	29.571	0.15288			2024-04-20 03:00:00	27	38	4.1	0.9	16.9
2024-04-20 04:00:00	32	80	2.1	2.7	21.7	0.77	6.1		0.3		11.3289	24.2596	0	5.043	28.749	0.85127	12.72	29.657	0.11113			2024-04-20 04:00:00	26	67	6.9	1.7	23.5	0.76	8.3		0.46		11.5731	23.4507	0	5.112	28.036	0.77533	13.22	34.028	0.1981			2024-04-20 04:00:00	21	36	3.7	0.8	19.6
2024-04-20 05:00:00	36	68	2.3	8.2	24.1	0.95	4		0.35		18.2198	30.7593	0	18.216	40.304	1.36083	1.917	34.273	0.18663			2024-04-20 05:00:00	22	64	8.2	6.4	23.8	0.73	3.2		0.48		16.1998	30.205	0	7.854	34.239	0.78016	13.448	19.292	0.15398			2024-04-20 05:00:00	19	36	2.8	0.8	19.7
2024-04-20 06:00:00	29	43	2.1	5.4	22.1	0.73	5.8		0.3		23.097	41.423	1.857	41.573	44.552	1.82731	0.484	27.063	0.31178			2024-04-20 06:00:00	21	44	7.4	4.9	19	0.65	6.1		0.35		14.9629	30.2037	9.529	15.467	43.036	0.92913	7.749	13.727	0.19547			2024-04-20 06:00:00	22	52	3.9	2	23.6
2024-04-20 07:00:00	31	74	5.4	16.5	28.4	1.12	7.9		0.45		25.3833	52.4504	9.701	31.289	46.863	1.5804	7.726	23.709	0.36824			2024-04-20 07:00:00	24	53	8.9	10.5	21.5	0.84	6.9		0.37		14.1119	34.0178	13.106	19.755	35.203	0.93791	18.702	16.328	0.31282			2024-04-20 07:00:00	28	41	3.3	4.3	21.7
2024-04-20 08:00:00	33	78	9.1	19.7	35.4	1.32	13.7		0.43		13.5987	24.1951	5.609	13.726	27.314	1.00189	32.293	13.558	0.27036			2024-04-20 08:00:00	27	49	8.3	7.2	22.4	0.84	17		0.32		7.85291	13.6474	5.16	7.911	17.342	0.65789	39.219	10.904	0.22968			2024-04-20 08:00:00	34	34	3	2.7	16.9
2024-04-20 09:00:00	36	59	4.1	12.3	32.4	0.87	22.3		0.23		11.7593	15.8588	1.442	7.594	15.333	0.4959	43.708	6.618	0.12603			2024-04-20 09:00:00	21	40	8.3	2.8	20.2	0.63	28.1		0.27		9.11472	11.9359	0.829	2.387	7.271	0.45479	50.506	5.181	0.12317			2024-04-20 09:00:00	30	30	2.6	2.6	14.5
2024-04-20 10:00:00	28	47	2.5	8	24.3	0.6	38.1		0.15		10.9709	13.7814	1.777	6.718	14.606	0.42971	48.156	4.866	0.11024			2024-04-20 10:00:00	17	36	7.3	2.3	14.8	0.51	40.1		0.17		11.159	13.6291	5.975	2.763	7.335	0.44023	57.904	4.79	0.12952			2024-04-20 10:00:00	24	26	2.6	1.8	12.3
2024-04-20 11:00:00	22	42	2.1	6.3	21.8	0.59	49.1		0.15		9.13776	11.942	2.143	4.79	11.483	0.37685	56.777	3.915	0.0949			2024-04-20 11:00:00	17	31	6.2	1.7	11.6	0.45	52.7		0.14		9.70542	11.8671	7.547	2.393	7.003	0.40378	64.113	4.112	0.12379			2024-04-20 11:00:00	19	27	2.9	1.6	10.9
2024-04-20 12:00:00	21	40	2.3	4.2	17.8	0.48	61.7		0.11		9.25022	12.4593	1.678	3.844	9.537	0.35504	64.122	3.632	0.08003			2024-04-20 12:00:00	18	35	4.6	1.2	10.8	0.43	58.4		0.13		9.1798	12.4873	4.939	1.269	4.342	0.3382	70.411	3.557	0.10915			2024-04-20 12:00:00	13	24	2.5	1.7	10.1
2024-04-20 13:00:00	22	32	2	2.7	14	0.45	67.1		0.1		7.41715	9.99149	1.685	3.486	9.012	0.34018	65.648	3.375	0.06491			2024-04-20 13:00:00	20	34	3	0.8	9.8	0.44	61.6		0.12		9.20499	11.6296	4.8	1.093	3.997	0.3328	73.576	3.402	0.09227			2024-04-20 13:00:00	14	27	2.4	1.3	10.5
2024-04-20 14:00:00	24	37	1.6	3.8	17.2	0.54	63.7		0.14		7.91661	10.8268	1.353	3.31	8.833	0.32812	63.751	2.87	0.06745			2024-04-20 14:00:00	20	35	2.9	0.8	12.2	0.47	58.3		0.13		8.58751	11.3121	3.359	1.023	3.967	0.32949	74.098	3.211	0.09517			2024-04-20 14:00:00	14	28	2.7	1.1	11.3
2024-04-20 15:00:00	30	43	1.7	3.3	21.1	0.61	60.4		0.15		10.2448	14.0975	0.743	2.729	15.909	0.40847	54.698	3.658	0.0802			2024-04-20 15:00:00	19	40	3.5	1	15.4	0.52	53.7		0.18		8.87215	11.79	1.018	1.022	5.353	0.36873	70.824	4.066	0.10743			2024-04-20 15:00:00	21	39	3.1	1.4	14.7
2024-04-20 16:00:00	31	35	2.2	3.5	27.6	0.61	40		0.14		11.0416	15.4314	0.737	4.365	14.763	0.40845	54.56	3.599	0.07892			2024-04-20 16:00:00	21	41	4.4	1.1	16.8	0.52	49.2		0.18		7.37567	9.8793	0.871	1.234	6.051	0.36259	63.946	4.252	0.10946			2024-04-20 16:00:00	19	39	3.9	1.4	15.5
2024-04-20 17:00:00	28	34	2.2	4.1	27.8	0.66	40.1		0.14		12.7403	18.4065	2.149	3.958	24.841	0.53363	41.733	4.912	0.11765			2024-04-20 17:00:00	22	39	5	1.5	24.3	0.73	40.4		0.23		6.6402	9.69691	5.697	1.274	8.519	0.37068	55.954	4.412	0.12512			2024-04-20 17:00:00	20	34	4.3	1.4	23.5
2024-04-20 18:00:00	21	39	1.7	3	30.2	0.72	35.3		0.16		15.0233	21.5768	4.476	3.796	39.677	0.76543	27.916	8.087	0.16558			2024-04-20 18:00:00	18	38	6.5	1.2	32.3	0.76	29.5		0.24		11.0868	15.7261	12.065	0.572	16.688	0.53689	48.316	6.648	0.17371			2024-04-20 18:00:00	20	38	3.9	1.4	22.4
2024-04-20 19:00:00	22	40	3.2	3.2	29.8	0.66	32.3		0.15		16.7649	24.0632	6.038	4.478	43.158	0.92344	23.016	9.73	0.18313			2024-04-20 19:00:00	23	40	6.8	1.3	32.7	0.77	25.4		0.23		15.809	21.1518	14.045	0.702	28.397	0.78422	38.949	10.941	0.26156			2024-04-20 19:00:00	26	34	4.3	1.5	27
2024-04-20 20:00:00	29	44	3.6	2.3	26.5	0.58	34.3		0.14		18.9988	27.0501	5.201	4.226	42.608	1.00871	23.733	9.696	0.1647			2024-04-20 20:00:00	30	46	8	1.4	29.6	0.74	24.3		0.23		19.9465	26.2179	15.044	0.573	27.133	0.88613	38.576	11.726	0.27745			2024-04-20 20:00:00	21	31	4.2	1.3	31.6
2024-04-20 21:00:00	28	48	2.3	3.9	29.3	0.67	24		0.15		23.0466	32.037	4.432	3.838	42.324	1.00728	21.604	11.164	0.17146			2024-04-20 21:00:00	28	40	6.6	1.4	25.9	0.73	25.5		0.22		26.8403	34.2291	11.621	0.609	33.791	1.05265	30.209	13.927	0.31652			2024-04-20 21:00:00	24	25	2.4	1.4	24.5
2024-04-20 22:00:00	30	39	1.4	4.6	30.7	0.78	20		0.21		31.3934	41.4995	4.256	4.187	45.483	1.11058	15.63	12.672	0.20178			2024-04-20 22:00:00	22	49	5.3	1.4	30	0.81	17.3		0.26		35.747	44.6507	12.327	0.581	36.26	1.14805	24.695	13.888	0.33591			2024-04-20 22:00:00	18	35	2.5	1.2	22.3
2024-04-20 23:00:00	21	24	1.2	2.5	27.2	0.62	25.6		0.15		41.9615	54.3647	3.261	2.377	41.441	1.11828	16.088	11.509	0.2211			2024-04-20 23:00:00	22	45	4.4	2.7	35.1	0.92	10.9		0.3		44.1322	56.0714	5.848	0.236	26.72	1.0395	30.653	8.748	0.31172			2024-04-20 23:00:00	18	28	2.7	1.4	20.3
2024-04-21	21	32	2	2.5	26.8	0.63	20		0.16		44.2093	58.7915	1.248	0.696	31.241	0.974	21.724	8.314	0.193			2024-04-21	18	37	3.6	1.3	26.8	0.78	15.8		0.26		48.8568	64.7262	3.024	0.072	19.54	0.90467	33.801	7.076	0.27246			2024-04-21	13	29	2.7	1.1	18.1
2024-04-21 01:00:00	17	41	2	1.9	26.6	0.59	14		0.22		28.5238	38.6874	0.339	0.418	18.214	0.71198	31.924	6.235	0.13183			2024-04-21 01:00:00	17	39	4.9	0.2	22.2	0.68	19		0.27		47.7725	66.3385	1.499	0.07	16.407	0.85104	32.89	8.148	0.2335			2024-04-21 01:00:00	20	33	1.6	0.6	14.5
2024-04-21 02:00:00	17	39	2.2	0.7	16.7	0.5	26.2		0.14		3.04315	3.79684	0.054	0.481	14.716	0.61478	33.738	8.387	0.11412			2024-04-21 02:00:00	22	42	4.9	0.3	23.8	0.72	15.3		0.29		25.8517	34.4991	0.917	0.085	12.406	0.71911	35.293	7.338	0.18656			2024-04-21 02:00:00	16	25	1.6	0.8	14.6
2024-04-21 03:00:00	23	28	1.7	0.9	18	0.55	18		0.18		3.84562	4.89445	0.02	0.993	16.625	0.61853	30.852	10.018	0.11493			2024-04-21 03:00:00	19	42	8.3		22.8	0.75	12.8		0.32		15.7034	18.9363	0.746	0.165	9.821	0.564	39.036	7.465	0.14743			2024-04-21 03:00:00	12	17	1.4	1.2	16.2
2024-04-21 04:00:00	20	28	2	1.8	20.7	0.66	12.7		0.25		9.01041	11.0524	0.046	2.247	23.25	0.73619	21.681	11.947	0.13448			2024-04-21 04:00:00	18	32	12.5	0.3	19.1	0.62	12.1		0.3		21.5948	26.8705	0.843	0.325	11.718	0.62612	36.391	9.359	0.14512			2024-04-21 04:00:00	6	8	1.3	0.7	5.2
2024-04-21 05:00:00	15	21	2.4	4.1	23.3	0.74	13.1		0.24		16.7038	20.7935	0.095	5.817	33.267	0.8744	10.583	13.238	0.14938			2024-04-21 05:00:00	14	18	12.6	0.4	16	0.57	19.5		0.26		23.1974	30.1051	0.393	0.6	16.056	0.74881	32.869	11.432	0.14896			2024-04-21 05:00:00	6	10	1.3	0.9	10.9
2024-04-21 06:00:00	7	14	2.8	7.3	26.6	0.83	17.4		0.23		22.2349	28.766	2.208	10.352	37.283	0.89112	7.881	11.458	0.15273			2024-04-21 06:00:00	6	11	12.1	0.9	17.3	0.56	23		0.25		25.0574	32.0964	10.771	1.556	22.101	0.83257	27.681	10.94	0.17242			2024-04-21 06:00:00	6	22	1.4	1	15.5
2024-04-21 07:00:00	7	18	3.4	10.5	27.7	0.97	24.8		0.23		26.3461	34.1399	2.793	17.851	33.373	0.93744	13.06	9.774	0.16976			2024-04-21 07:00:00	3	23	6.4	7	28	0.86	16.7		0.34		22.884	29.1544	12.047	4.359	21.917	0.83067	30.101	9.867	0.20918			2024-04-21 07:00:00	3	21	2	2.2	17.1
2024-04-21 08:00:00	13	19	3.1	5.1	21.5	0.64	36.1		0.16		28.6736	37.5597	2.69	19.154	33.023	1.02155	18.147	10.606	0.1852			2024-04-21 08:00:00	5	21	5	4.7	25	0.84	30.7		0.33		19.5551	27.9607	8.068	4.412	13.442	0.70195	43.886	8.931	0.20252			2024-04-21 08:00:00	11	15	2.6	1.5	12.7
2024-04-21 09:00:00	14	23	3.3	5.5	25.3	0.74	36.9		0.2		26.0182	34.6245	2.525	11.912	26.186	0.9356	31.607	7.95	0.21763			2024-04-21 09:00:00	9	12	5.1	2	15.6	0.54	38.2		0.17		16.6824	26.9818	2.71	2.899	15.569	0.7205	44.812	6.239	0.23046			2024-04-21 09:00:00	12	16	2.8	2.4	13.5
2024-04-21 10:00:00	15	29	3.8	5.2	28.1	0.8	43.5		0.22		21.1403	30.034	2.516	5.466	14.172	0.66492	55.38	5.809	0.1694			2024-04-21 10:00:00	14	19	8.2	1.3	13.3	0.51	43.3		0.16		14.9812	25.535	4.232	4.28	11.011	0.61289	56.431	4.679	0.17966			2024-04-21 10:00:00	16	20	3.1	2.4	15.3
2024-04-21 11:00:00	12	32	3.6	5.8	27	0.69	43.8		0.19		15.1407	22.7983	2.421	2.467	7.742	0.46774	70.291	3.533	0.12041			2024-04-21 11:00:00	15	26	5.9	1.9	15.8	0.55	40.3		0.17		12.0359	22.6639	5.423	2.435	7.7	0.42722	63.933	2.744	0.13667			2024-04-21 11:00:00	9	22	2.9	2.9	13
2024-04-21 12:00:00	19	32	3.8	4.9	17	0.49	44.7		0.11		10.0103	16.0062	1.443	1.802	5.561	0.33929	68.725	1.444	0.08909			2024-04-21 12:00:00	17	38	3.9	1.4	11.5	0.43	39		0.1		11.0189	22.8776	4.123	1.612	7.206	0.40653	63.551	0.799	0.15202			2024-04-21 12:00:00	18	21	2	2.2	11.9
2024-04-21 13:00:00	18	31	2.9	6	20.7	0.62	46.6		0.12		9.09884	14.7829	1.557	1.662	5.682	0.3557	75.178	1.149	0.0886			2024-04-21 13:00:00	15	30	3.2	1	12.1	0.47	45.7		0.11		7.13999	15.3589	3.574	1.538	5.257	0.38741	73.683	1.054	0.12295			2024-04-21 13:00:00	16	31	2.2	1.6	15.2
2024-04-21 14:00:00	29	34	2.9	4.8	19.5	0.6	44.9		0.13		7.20697	11.0283	1.673	1.977	7.323	0.41384	78.31	1.536	0.10743			2024-04-21 14:00:00	13	36	4.1	0.8	15.2	0.54	40.2		0.13		6.30432	12.4964	2.738	1.439	5.341	0.38824	73.487	1.481	0.12552			2024-04-21 14:00:00	24		2	1.7	10
2024-04-21 15:00:00	29	39	2.6	3.5	18.5	0.52	41.6		0.11		5.83141	9.25828	0.836	2.404	8.056	0.35883	63.201	1.51	0.09013			2024-04-21 15:00:00	17	31	7.5	1.1	16.8	0.47	32.4		0.14		6.82114	12.7632	0.911	1.763	6.275	0.37206	65.251	1.431	0.12436			2024-04-21 15:00:00	12	12	1.7	1.5	10.3
2024-04-21 16:00:00	32	41	2.5	4	24.2	0.63	31.9		0.16		6.63113	11.6882	0.713	2.143	8.06	0.3655	59.559	1.607	0.087			2024-04-21 16:00:00	7	25	9.3	0.9	15	0.44	26.6		0.14		7.20149	15.6361	0.553	1.666	6.69	0.37118	62.139	1.596	0.11448			2024-04-21 16:00:00	18	17	1.5	1.2	10.2
2024-04-21 17:00:00	25	35	2.4	4.6	24.8	0.64	26		0.16		7.7827	15.4327	1.682	2.17	12.525	0.43681	55.243	2.02	0.10718			2024-04-21 17:00:00	4	25	11.5	1.1	15.6	0.51	23.3		0.17		7.84343	21.6376	3.914	2.116	11.941	0.4479	54.518	2.009	0.14907			2024-04-21 17:00:00	9	14	1.2	0.9	10.5
2024-04-21 18:00:00	18	34	3.2	6	41.4	0.81	17.2		0.22		8.9766	19.32	3.363	1.161	22.014	0.56708	44.004	2.864	0.13045			2024-04-21 18:00:00	20	44	12.6	1.7	31.7	0.95	16.2		0.31		9.16609	26.8737	8.137	1.208	21.768	0.59186	42.817	2.894	0.18989			2024-04-21 18:00:00	9	21	1.5	1.7	17
2024-04-21 19:00:00	14	28	7.5	2.7	30.3	0.61	29.5		0.14		9.72865	19.7821	6.186	1.6	32.555	0.71407	31.727	3.708	0.14919			2024-04-21 19:00:00	23	35	13.5	1.7	39.7	0.87	16.9		0.32		9.35272	23.5738	9.528	1.358	25.033	0.67089	36.684	3.609	0.21389			2024-04-21 19:00:00	16	23	2.3	5.7	23.9
2024-04-21 20:00:00	13	30	3.5	2.3	28.5	0.59	28.8		0.15		9.05598	17.1931	4.821	1.191	25.326	0.61841	36.445	3.332	0.13549			2024-04-21 20:00:00	17	32	12.4	3.1	40.3	0.95	13.5		0.33		11.7744	26.0759	7.805	1.187	27.71	0.72767	33.414	4.437	0.20626			2024-04-21 20:00:00	26		1.9	1.3	13.7
2024-04-21 21:00:00	12	33	3.8	5.2	41	0.74	14.9		0.19		8.51098	17.0166	3.614	1.166	24.157	0.60678	35.417	3.621	0.12917			2024-04-21 21:00:00	20	38	13.1	4.7	40.6	1.03	8.8		0.36		10.6999	24.1688	6.276	1.22	29.665	0.80347	30.312	4.809	0.23169			2024-04-21 21:00:00	24	20	1.4	0.8	14.8
2024-04-21 22:00:00	11	33	3.7	5.5	41.4	0.82	10		0.22		8.47653	18.1364	3.383	1.163	24.381	0.62389	32.537	4.413	0.13396			2024-04-21 22:00:00	18	34	9.8	6.2	40.7	1.06	4.5		0.36		10.1641	24.2074	5.314	1.29	26.099	0.76236	28.36	5.477	0.21643			2024-04-21 22:00:00	18	22	1.7	5.9	28
2024-04-21 23:00:00	12	36	3.7	2.3	35.5	0.67	9.4		0.21		10.0812	22.3674	2.414	1.015	27.65	0.76392	27.362	6.115	0.14984			2024-04-21 23:00:00	17	34	11.6	5.6	33.1	0.98	3.4		0.32		11.2848	26.915	2.472	1.041	27.68	0.82838	23.907	7.424	0.23196			2024-04-21 23:00:00	10	41	2.9	5.4	31.7
2024-04-22	14	38	3.4	4.9	37.5	0.81	4.6		0.27		13.3702	26.1056	1.85	0.24	26.138	0.72617	25.301	7.841	0.15042			2024-04-22	17	23	5.3	5.5	25.6	0.88	3.8		0.29		12.1078	27.1498	1.481	0.184	23.631	0.72494	25.188	8.578	0.21828			2024-04-22	19	34	2.6	4.3	33.7
2024-04-22 01:00:00	16	38	3	4.4	33.6	0.77	3.6		0.3		16.2512	27.9112	1.435	0.242	21.304	0.62624	25.462	8.411	0.13603			2024-04-22 01:00:00	8	30	2.2	1.4	10.7	0.43	9.4		0.16		9.26856	19.1692	0.823	0.195	16.727	0.56721	27.17	8.878	0.17444			2024-04-22 01:00:00	24	41	2.6	5.6	32.9
2024-04-22 02:00:00	16	39	2.7	2.7	27.7	0.62	3.7		0.25		20.2751	30.9718	1.192	0.335	17.48	0.54609	26.155	7.708	0.11888			2024-04-22 02:00:00	10	36	2.9	5.1	15.9	0.61	6.7		0.31		8.35374	15.6678	0.335	0.275	8.434	0.33953	33.682	8.384	0.112			2024-04-22 02:00:00	19	35	1.8	2.4	18.9
2024-04-22 03:00:00	14	31	1.6	1.1	11.8	0.4	12		0.13		23.4933	32.9373	1.255	0.527	17.704	0.53403	24.43	5.442	0.10768			2024-04-22 03:00:00	16	36	3.8	13.1	23.6	0.89	2		0.5		9.36457	16.9457	0.293	0.399	9.953	0.3628	32.175	8.544	0.12412			2024-04-22 03:00:00	21	25	1.4	1.7	8.6
2024-04-22 04:00:00	14	34	1.1	0.9	7.5	0.33	14.6		0.11		23.7278	32.6653	1.187	1.698	23.215	0.59269	20.218	4.352	0.09813			2024-04-22 04:00:00	10	36	4.2	10.5	20.1	0.75	2.1		0.43		13.3066	23.1984	0.388	1.78	23.297	0.68957	20.015	9.57	0.15783			2024-04-22 04:00:00	12	28	1.5	1.7	8.9
2024-04-22 05:00:00	9	29	0.9	1.1	6.9	0.32	13.3		0.09		24.8376	34.2737	1.134	7.734	38.112	0.95498	6.348	4.974	0.12141			2024-04-22 05:00:00	9	36	4.2	14.1	17.9	0.74	2.6		0.5		17.4468	28.9153	0.568	10.556	40.457	1.34621	3.152	11.119	0.21676			2024-04-22 05:00:00	12	28	1.7	2.6	10.8
2024-04-22 06:00:00	11	30	1	10.8	12.6	0.63	10.2		0.16		28.7358	39.9785	4.165	30.441	41.692	1.31056	2.302	7.382	0.17228			2024-04-22 06:00:00	15	34	2.1	11.4	17.2	0.68	5.5		0.39		17.8152	27.8408	11.331	29.028	41.343	1.60719	2.559	10.59	0.27086			2024-04-22 06:00:00	4	32	2.4	14.7	17.7
2024-04-22 07:00:00	8	36	1.9	35.2	22.8	1.46	7.4		0.34		18.6474	27.2443	6.245	37.693	38.384	1.26163	8.949	7.277	0.20771			2024-04-22 07:00:00	17	32	1.5	15.5	21.8	0.84	9		0.31		13.3605	21.9948	10.852	18.391	34.113	1.06856	11.227	6.554	0.26666			2024-04-22 07:00:00	19	38	2.8	19.6	22.5
2024-04-22 08:00:00	20	32	3.1	28.6	32.4	1.44	13.7		0.36		17.5094	31.2812	3.878	15.355	26.867	0.73689	26.251	4.47	0.1553			2024-04-22 08:00:00	17	36		17	31.6	1.18	18.2		0.39		12.329	21.7022	4.653	9.25	18.934	0.66062	31.077	3.906	0.2092			2024-04-22 08:00:00	19	36	3	11.4	20.1
2024-04-22 09:00:00	14	36	3.9	14.9	27	0.98	29.8		0.24		18.6244	35.1752	2.203	14.739	25.679	0.71518	32.726	7.51	0.18873			2024-04-22 09:00:00	19	39		4.3	21.7	0.73	43.3		0.26		12.6614	23.4073	1.733	6.209	14.665	0.54374	44.032	7.431	0.23382			2024-04-22 09:00:00	28	24	3.3	6.5	14.4
2024-04-22 10:00:00	24	31	3	9.6	28.2	0.77	44.8		0.24		21.1102	38.5031	2.503	9.587	20.908	0.59394	45.786	6.883	0.18105			2024-04-22 10:00:00	17	30		2.3	12.7	0.4	48.6		0.16		16.2076	28.1791	4.832	4.645	12.291	0.44571	54.637	6.184	0.18217			2024-04-22 10:00:00	19	22	3.9	3.5	11
2024-04-22 11:00:00	21	44	3.5	6.1	23.2	0.54	48.4		0.2		16.7349	27.8777	3.379	6.348	16.597	0.49519	57.421	5.611	0.16093			2024-04-22 11:00:00	17	36		1.6	12.1	0.38	60.9		0.17		17.1763	28.1993	6.171	3.513	9.86	0.35135	60.878	5.01	0.13482			2024-04-22 11:00:00	25	25	3.2	3.4	10.4
2024-04-22 12:00:00	30	39	2.8	3.8	14.8	0.35	41.6		0.1		10.8043	18.1982	1.355	6.557	14.976	0.409	38.638	1.174	0.13987			2024-04-22 12:00:00	20	34		1.7	11.1	0.35	59.4		0.13		8.62604	15.839	6.583	5.504	14.171	0.44348	59.078	4.201	0.20646			2024-04-22 12:00:00	18	21	1.9	2.9	6.6
2024-04-22 13:00:00	22	42	2.7	5.3	17.2	0.37	35		0.11		6.91069	10.961	1.495	4.03	17.81	0.42542	34.498	2.682	0.11243			2024-04-22 13:00:00	23	34		1.4	8.8	0.26	51.1		0.11		10.0761	15.67	5.647	2.273	14.263	0.35288	45.12	2.626	0.13173			2024-04-22 13:00:00	17	31	2.8	2.9	7.3
2024-04-22 14:00:00	19	46	3.3	3.4	20.2	0.37	30.9		0.11		6.60574	12.5012	0.058	2.285	24.604	0.50684	35.652	1.079	0.1527			2024-04-22 14:00:00	19	37		2	19	0.41	36.7		0.19		5.55107	10.9005	1.34	2.754	18.35	0.45609	40.166	1.982	0.22284			2024-04-22 14:00:00	13	33	2.3	2.3	8.6
2024-04-22 15:00:00	20	42	2.7	3.8	21.9	0.44	25.6		0.15		10.7587	23.9753	0	5.525	35.139	0.74657	28.555	4.365	0.20968			2024-04-22 15:00:00	18	50		2.7	24	0.47	27.2		0.19		3.62508	10.3333	0	4.623	18.741	0.52175	42.783	6.615	0.2562			2024-04-22 15:00:00	26	44	2.5	2.7	11.9
2024-04-22 16:00:00	29	37	2.6	10.6	33	0.62	8.8		0.2		12.9248	27.6197	0	4.04	28.796	0.68334	38.055	4.444	0.18333			2024-04-22 16:00:00	18	43	6.3	3.1	26	0.51	20.9		0.22		10.2603	21.5493	0	2.689	28.751	0.68415	37.1	7.065	0.2612			2024-04-22 16:00:00	27	28	1.9	2.3	11
2024-04-22 17:00:00	31	32	3.9	14.3	37.2	0.78	5.7		0.24		18.6984	38.8029	0.077	9.895	35.415	0.80782	26.609	1.285	0.21538			2024-04-22 17:00:00	9	28	5.4	2.9	25	0.66	16		0.3		9.59758	22.1824	4.167	2.881	31.235	0.64316	30.589	3.203	0.26934			2024-04-22 17:00:00	38		2.1	2.2	13.3
2024-04-22 18:00:00	29	38	4.8	40.6	43.8	1.65	1.7		0.5		17.4942	48.6033	6.158	13.459	53.555	1.07309	9.658	7.684	0.25426			2024-04-22 18:00:00	7	29	5.7	5.6	30.2	0.81	10.4		0.3		11.6479	30.2044	13.265	4.314	40.1	0.74486	18.885	7.518	0.305			2024-04-22 18:00:00	21	26	2.2	2.2	13.4
2024-04-22 19:00:00	21	49	4.9	35.3	43.8	1.55	2.5		0.48		19.9548	54.3422	11.04	22.524	54.635	1.28346	4.206	13.106	0.2719			2024-04-22 19:00:00	14	33	6.1	14.8	36.7	1.19	2.8		0.51		21.6841	41.4503	17.092	7.544	45.947	0.85551	10.955	12.803	0.36928			2024-04-22 19:00:00	18	27	2.6	2.1	12.6
[truncated: 220 more rows]
[truncated: 175 more columns]

## Sheet: Fig.S7
	Banqiao																										Zhongming
[truncated: 746 more rows]

[truncated: 9 more sheets: Fig.S8, Fig.4、Fig.S10, Fig.S11, Fig.5, Fig.6, Fig.7、Fig.S12, Fig.8、Fig.S13, Fig.9、Fig.S14, Fig.10]
