# Supplementary material for: PM2.5 episodes in central Taiwan under weak southwesterly winds in spring
Source: Research Square preprint supplement (doi:10.21203/rs.3.rs-6798112/v1), 2025-06-16
Supplement: Supplementary file 2 [file b6c8aa2159e92b179a2e0710.docx]

Table S1 WRF and CMAQ model configurations

| WRF version 4.2.1 | Settings |
| --- | --- |
| Microphysics | WSM 6-class graupel scheme |
| Radiation Physics (lw) | RRTM scheme |
| Radiation Physics (sw) | Dudhia scheme |
| Surface Layer | Revised MM5 Monin-Obukhov scheme |
| Land/Water Surface | unified Noah land-surface model |
| PBL Physics | MYNN2 scheme |
| Cumulus Parameterization | Grell-Freitas ensemble scheme |
| CMAQ version 5.5 |  |
| The generalized-coordinate driver module | Yamartino scheme |
| The time-step initialization module | Yamartino scheme |
| Mass conservation error adjustment scheme | Yamartino scheme |
| Horizontal advection module | global mass-conserving scheme |
| Vertical advection module | global mass-conserving scheme |
| Horizontal diffusion module | diffusion coefficient based on local wind deformation |
| Vertical diffusion module | eddy diffusivity theory |
| Photolysis calculation module | In-line method and using ozone monitoring instrument (OMI) column data for photolysis input. |
| Gas-phase chemistry solver module | cb6r3 |
| aerosol module | Ae7_aq |
| aerosol deposition velocity module | second-generation CMAQ aerosol deposition velocity routine |
| cloud module | ACM cloud processor that uses the ACM methodology to  compute convective mixing |

Table S2 Formulas for statistical evaluation indices.

| **Statistical index** | **Formula** | **Variable** |
| --- | --- | --- |
| 1. Mean Bias |  | Temp, WS, RH (hour) |
| 2. Mean Average Gross Error |  | Temp, RH (hour) |
| 3. Root Mean Square Error |  | WS (hour) |
| 4. Index of agreement, IOA | IOA = 1 | Temp, WS, RH (hour), PM2.5, SO2, NO2 (day), NMHC, O3 (hour), |
| 5. Wind Normalized Mean Bias | WNMB = | WD (hour) |
| 6. Wind Normalized Mean Error | WNME = | WD (hour) |
| 7. Mean Fractional Bias |  | PM2.5, SO2, NO2 (day) |
| 8. Mean Fractional Error |  | PM2.5, SO2, NO2 (day) |
| 9. Mean Normalized Bias |  | NMHC, O3 (hour) |
| 10. Mean Normalized Error |  | NMHC, O3 (hour) |
| 11. Maximum Peak Normalized Bias |  | O3 (hour) |
| 12. Normalized Mean Bias |  | PM2.5, PM2.5 species (PM2.5 sampling days) |
| 13. Normalized Mean Error |  | PM2.5, PM2.5 species (PM2.5 sampling days) |
| 14. Fractional Bias |  | PM2.5, PM2.5 species (PM2.5 sampling days) |
| 15. Fractional Error |  | PM2.5, PM2.5 species (PM2.5 sampling days) |
| 16. Correlation coefficient (r) | r = ]  =  = | NMHC, O3 (hour) and PM2.5, SO2, NO2 (day) |

Note: Temp, WS, WD, RH represent Temperature, Wind Speed, Wind Direction, and Relative Humidity. PM2.5 species represent SO42-, NH4+, NO3-, OC, EC. PM2.5 sampling days (3, 9,15,21 and 27 April 2019).

Table S3 The performance of meteorological modeling results for domain 4 from 22 March to 30 April 2019.

|  | Temperature | | | | | Wind Speed | | | | | Wind Direction | | Relative Humidity | | | | |
| --- | --- | --- | --- | --- | --- | --- | --- | --- | --- | --- | --- | --- | --- | --- | --- | --- | --- |
|  | Avg  Mod | Avg  Obs | MB | MAGE | IOA | Avg  Mod | Avg  Obs | MB | RMSE | IOA | WNMB | WNME | Avg  Mod | Avg  Obs | MB | MAGE | IOA |
| Standard  Sta. | (°C) | (°C) | ±1.5 | <3 | >0.7 | (m s-1) | (m s-1) | ±1.5 | <3 | >0.6 | ±10% | <30% | (%) | (%) | - | - |  |
| KL | 22.1 | 22.1 | 0.0 | 0.5 | 0.99 | 2.2 | 2.6 | -0.4 | 0.7 | 0.94 | 1.7 | 11.2 | 81.3 | 81.2 | 0.1 | 3.7 | 0.91 |
| TP | 23.0 | 23.2 | -0.2 | 0.6 | 0.99 | 2.0 | 2.3 | -0.3 | 0.6 | 0.96 | -2.3 | 12.3 | 76.9 | 76.9 | -0.2 | 4.7 | 0.93 |
| ZZ | 17.6 | 18.6 | -0.9 | 1.2 | 0.96 | 2.4 | 1.9 | 0.5 | 0.9 | 0.93 | -3.1 | 14.4 | 92.4 | 87.2 | 5.2 | 7.5 | 0.68 |
| AB | 17.4 | 17.1 | 0.4 | 0.8 | 0.98 | 2.4 | 2.5 | -0.1 | 1.0 | 0.88 | -10.4 | 25.5 | 92.8 | 92.5 | 0.3 | 4.3 | 0.84 |
| FG | 20.5 | 20.2 | 0.3 | 0.7 | 0.98 | 2.1 | 2.0 | 0.1 | 0.5 | 0.95 | -1.0 | 11.0 | 86.6 | 91.6 | -5.0 | 6.6 | 0.76 |
| WL | 19.2 | 19.7 | -0.5 | 1.1 | 0.97 | 1.9 | 1.9 | 0.0 | 0.8 | 0.92 | -2.6 | 15.1 | 88.8 | 92.7 | -3.9 | 7.3 | 0.76 |
| TS | 22.2 | 22.1 | 0.1 | 0.8 | 0.97 | 1.8 | 1.5 | 0.2 | 0.5 | 0.95 | 1.8 | 13.8 | 82.2 | 84 | -1.8 | 4.8 | 0.87 |
| BQ | 23.2 | 22.8 | 0.4 | 0.7 | 0.99 | 1.7 | 1.9 | -0.2 | 0.5 | 0.96 | 1.1 | 14.1 | 75.7 | 77.5 | -1.7 | 4.0 | 0.94 |
| TY | 22.5 | 22.4 | 0.1 | 0.6 | 0.99 | 1.1 | 0.6 | 0.4 | 0.6 | 0.84 | -2.8 | 17.6 | 77.7 | 78.9 | -1.2 | 4.3 | 0.94 |
| XW | 22.0 | 22.2 | -0.2 | 0.8 | 0.97 | 4.2 | 4.5 | -0.3 | 0.8 | 0.98 | -1.6 | 7.9 | 84.5 | 81.6 | 2.8 | 4.5 | 0.87 |
| HC | 22.9 | 22.7 | 0.2 | 0.6 | 0.99 | 1.7 | 1.6 | 0.1 | 0.4 | 0.98 | -1.1 | 12.5 | 76.5 | 77.5 | -1.0 | 3.5 | 0.93 |
| ML | 22.9 | 22.9 | 0.1 | 0.5 | 0.99 | 2.0 | 1.9 | 0.1 | 0.4 | 0.98 | -3.4 | 11.0 | 77.7 | 79 | -1.2 | 4.7 | 0.92 |
| TC | 24.8 | 24.0 | 0.8 | 0.9 | 0.97 | 1.4 | 1.3 | 0.1 | 0.4 | 0.96 | 4.1 | 14.1 | 72.5 | 79.4 | -6.9 | 7.0 | 0.87 |
| WQ | 23.6 | 23.0 | 0.6 | 0.7 | 0.98 | 3.3 | 3.9 | -0.6 | 0.9 | 0.94 | 4.0 | 8.9 | 77.2 | 79.5 | -2.3 | 4.1 | 0.86 |
| FY | 23.6 | 22.7 | 0.9 | 1.0 | 0.97 | 1.5 | 1.3 | 0.2 | 0.3 | 0.94 | -0.7 | 10.9 | 76.5 | 84.8 | -8.4 | 9.5 | 0.82 |
| XT | 24.1 | 23.5 | 0.6 | 0.8 | 0.98 | 1.7 | 1.5 | 0.2 | 0.4 | 0.96 | 2.7 | 15.0 | 74.6 | 79.3 | -4.7 | 5.9 | 0.89 |
| DL | 25.2 | 24.9 | 0.3 | 0.6 | 0.99 | 1.4 | 1.4 | 0.0 | 0.3 | 0.96 | 2.5 | 13.8 | 70.9 | 75.7 | -4.7 | 6.0 | 0.90 |
| EL | 23.8 | 23.1 | 0.8 | 0.9 | 0.97 | 2.4 | 2.5 | -0.1 | 0.5 | 0.98 | -0.3 | 8.4 | 74.7 | 88.1 | -13.4 | 13.5 | 0.69 |
| LB | 23.5 | 23.2 | 0.3 | 0.8 | 0.97 | 2.1 | 2.0 | 0.2 | 0.4 | 0.98 | -2.4 | 9.2 | 77.3 | 85.5 | -8.2 | 8.5 | 0.83 |
| CY | 25.1 | 24.5 | 0.6 | 1.0 | 0.97 | 1.8 | 1.8 | 0.0 | 0.4 | 0.97 | -0.3 | 11.4 | 71.7 | 76.0 | -4.2 | 5.2 | 0.89 |
| AL | 13.8 | 11.3 | 2.5 | 2.5 | 0.78 | 1.5 | 1.4 | 0.1 | 0.4 | 0.89 | -8.8 | 22.6 | 73.3 | 80.0 | -6.7 | 9.8 | 0.90 |
| TN | 25.3 | 25.3 | 0.0 | 0.5 | 0.99 | 2.6 | 2.7 | -0.1 | 0.5 | 0.97 | 4.8 | 10.4 | 71.9 | 73.9 | -2.0 | 3.7 | 0.92 |
| YK | 25.5 | 25.0 | 0.5 | 0.7 | 0.98 | 2.5 | 2.6 | -0.1 | 0.5 | 0.97 | 0.9 | 8.8 | 71.0 | 74.9 | -3.9 | 4.7 | 0.87 |
| KS | 25.3 | 26.3 | -1.0 | 1.1 | 0.90 | 2.4 | 2.2 | 0.2 | 0.4 | 0.98 | -4.2 | 10.0 | 79.9 | 74.6 | 5.4 | 6.3 | 0.75 |
| HeC | 25.3 | 26.2 | -0.9 | 1.0 | 0.95 | 2.9 | 2.8 | 0.2 | 0.4 | 0.99 | 0.7 | 9.7 | 78.2 | 76.2 | 2.0 | 4.2 | 0.96 |
| YL | 22.7 | 22.9 | -0.2 | 0.6 | 0.99 | 1.6 | 1.9 | -0.2 | 0.6 | 0.94 | -4.3 | 16.9 | 82.6 | 83.6 | -0.9 | 3.7 | 0.87 |
| SA | 21.7 | 22.6 | -0.9 | 1.1 | 0.96 | 2.4 | 2.5 | -0.1 | 0.5 | 0.96 | -0.2 | 13.4 | 86.7 | 84.1 | 2.6 | 5.5 | 0.80 |
| HL | 23.5 | 23.8 | -0.4 | 0.6 | 0.98 | 2.3 | 2.9 | -0.6 | 1.0 | 0.89 | -6.9 | 14.9 | 77.9 | 75.9 | 1.9 | 3.7 | 0.85 |
| TT | 24.2 | 25.3 | -1.0 | 1.1 | 0.91 | 1.9 | 1.6 | 0.3 | 0.4 | 0.97 | 2.5 | 10.3 | 82.9 | 75.8 | 7.2 | 7.5 | 0.64 |
| CG | 24.1 | 24.0 | 0.1 | 0.7 | 0.97 | 2.8 | 2.7 | 0.1 | 0.5 | 0.97 | -0.7 | 10.3 | 80.8 | 80.7 | 0.2 | 3.8 | 0.84 |
| DW | 25.2 | 25.6 | -0.4 | 1.0 | 0.96 | 2.3 | 2.4 | -0.1 | 0.5 | 0.96 | 1.5 | 12.4 | 72.4 | 71.0 | 1.4 | 6.1 | 0.86 |
| LY | 23.7 | 23.1 | 0.6 | 0.7 | 0.96 | 6.9 | 7.2 | -0.4 | 0.9 | 0.98 | -2.0 | 6.0 | 89.6 | 93.9 | -4.3 | 5.3 | 0.82 |
| NT | 24.3 | 24.0 | 0.2 | 0.7 | 0.98 | 1.7 | 1.9 | -0.2 | 0.5 | 0.94 | -10.7 | 20.7 | 72.4 | 79.7 | -7.1 | 7.9 | 0.89 |
| RY | 21.1 | 19.8 | 1.3 | 1.5 | 0.93 | 1.2 | 1.3 | -0.1 | 0.5 | 0.88 | -3.8 | 18.4 | 78 | 79.0 | -1.0 | 4.6 | 0.92 |
| YS | 6.4 | 4.6 | 1.8 | 2.6 | 0.69 | 2.6 | 3.9 | -1.3 | 2.0 | 0.67 | -1.5 | 25.8 | 71.2 | 81.4 | -10.1 | 14.2 | 0.85 |
| MG | 23.2 | 23.8 | -0.6 | 0.8 | 0.93 | 5.2 | 3.4 | 1.8 | 2.3 | 0.77 | 0.0 | 4.9 | 87.6 | 84.7 | 2.9 | 4.0 | 0.81 |
| KM | 20.0 | 19.8 | 0.2 | 0.6 | 0.99 | 3.1 | 2.9 | 0.2 | 0.5 | 0.98 | -0.3 | 7.5 | 82.3 | 81.1 | 1.2 | 3.7 | 0.95 |
| MT | 17.3 | 16.9 | 0.4 | 0.8 | 0.98 | 3.2 | 3.2 | 0.1 | 0.4 | 0.99 | 1.3 | 9.5 | 86.7 | 85.8 | 0.9 | 3.9 | 0.89 |
| PJ | 22.2 | 21.6 | 0.6 | 1.0 | 0.96 | 6.8 | 7.1 | -0.3 | 1.6 | 0.91 | -1.2 | 4.8 | 81.1 | 82 | -0.9 | 3.5 | 0.93 |
| DG | 24.3 | 24.6 | -0.3 | 0.5 | 0.97 | 6.3 | 6.5 | -0.2 | 1.4 | 0.95 | -2.0 | 4.6 | 77.1 | 68.5 | 8.5 | 8.6 | 0.31 |
| Avg | 22.2 | 22.0 | 0.2 | 0.9 | 0.98 | 2.6 | 2.6 | 0.0 | 0.8 | 0.97 | -1.2 | 12.5 | 79.3 | 80.9 | -1.6 | 5.8 | 0.88 |
| Compliance rate |  |  | 95% | 100% |  |  |  | 98% | 100% |  | 95% | 100% |  |  |  |  |  |

Note：The above 40 weather monitoring sites in western-middle Taiwan are listed from north to south.

| station | Abbreviations | station | Abbreviations |
| --- | --- | --- | --- |
| Alishan | AL | Matsu | MT |
| Anbu | AB | Miaoli | ML |
| Banqiao | BQ | Nantou | NT |
| Chenggong | CG | Pengjiayu | PJ |
| Chiayi | CY | Riyuetan | RY |
| Dali | DL | Suao | SA |
| Dawu | DW | Taichung | TC |
| Dongjidao | DG | Tainan | TN |
| Erlin | EL | Taipei | TP |
| Fengyuan | FY | Taitung | TT |
| Fugueicape | FG | Tamsui | TS |
| Hengchun | HeC | Taoyuan | TY |
| Hsinchu | HC | Wanli | WL |
| Hualien | HL | Wuqi | WQ |
| Kaohsiung | KS | Xinwu | XW |
| Keelung | KL | Xitun | XT |
| Kinmen | KM | Yilan | YL |
| Lanyu | LY | Yongkang | YK |
| Lunbei | LB | Yushan | YS |
| Magong | MG | Zhuzihu | ZZ |

Note: The full names and their abbreviations are listed in order of starting alphabet from A to Z. The measurement brands for surface temperature, wind direction/speed, and relative humidity are R.M. Young 05103 Pt-Electrical Resistance Thermometer (R.M. Young Company), Propeller Wind Direction Anemometer (Komatsu Geophysical Instruments), and Isuzu Seisakusho 3-3122 Quartz Precision Thermo-Hygrograph (Isuzu Seisakusho Co., Ltd.), respectively.

Table S4 The performance of chemical modeling results for domain 4 from 01 April to 30 April 2019 (1/2)

| daily | PM2.5 | | | | | | SO2 | | | | | | NO2 | | | | | |
| --- | --- | --- | --- | --- | --- | --- | --- | --- | --- | --- | --- | --- | --- | --- | --- | --- | --- | --- |
| Standard  Sta. | Avg  Mod  (µg m-3) | Avg  Obs  (µg m-3) | r  (>0.5) | MFB  (±35) | MFE  (<55) | IOA | Avg  Mod  (ppb) | Avg  Obs  (ppb) | r  (>0.45) | MFB  (±65) | MFE  (<85) | IOA | Avg  Mod  (ppb3) | Avg  Obs  (ppb) | r  (>0.45) | MFB  (±65) | MFE  (<85) | IOA |
| FG | 12.9 | 16.2 | 0.88 | -22.2 | 25.1 | 0.87 | 0.7 | 0.8 | 0.62 | -12.2 | 40.9 | 0.78 | 2.7 | 3.3 | 0.83 | -27.0 | 33.7 | 0.87 |
| KE | 14.7 | 15.0 | 0.84 | -1.1 | 14.8 | 0.91 | 1.5 | 2.0 | 0.56 | -30.9 | 37.3 | 0.65 | 13.3 | 12.2 | 0.81 | 12.9 | 24.2 | 0.88 |
| YM | 11.1 | 11.7 | 0.83 | -3.3 | 28.9 | 0.91 | 1.5 | 1.7 | 0.43 | -17.7 | 25.5 | 0.63 | 3.9 | 2.3 | 0.53 | 47.4 | 57.2 | 0.53 |
| WH | 18.4 | 18.7 | 0.92 | -0.9 | 16.4 | 0.92 | 2.0 | 2.5 | 0.75 | -20.2 | 24.6 | 0.77 | 18.9 | 22.6 | 0.63 | -18.3 | 23.0 | 0.71 |
| ZS | 19.1 | 20.4 | 0.82 | -8.5 | 16.5 | 0.89 | 2.3 | 2.7 | 0.51 | -15.6 | 20.1 | 0.67 | 20.5 | 25.1 | 0.61 | -21.9 | 24.7 | 0.67 |
| GT | 20.1 | 23.1 | 0.85 | -14.5 | 18.4 | 0.90 | 1.9 | 2.1 | 0.89 | -11.4 | 15.2 | 0.91 | 17.9 | 19.7 | 0.77 | -10.7 | 17.5 | 0.85 |
| SS | 17.9 | 19.9 | 0.88 | -11.0 | 20.1 | 0.87 | 2.2 | 2.8 | 0.82 | -19.5 | 21.5 | 0.82 | 17.3 | 20.8 | 0.82 | -19.9 | 22.2 | 0.82 |
| SiL | 14.6 | 18.3 | 0.84 | -24.2 | 28.4 | 0.83 | 1.9 | 2.2 | 0.72 | -13.6 | 20.9 | 0.81 | 13.0 | 13.6 | 0.81 | -1.5 | 21.6 | 0.88 |
| TuC | 21.2 | 22.2 | 0.83 | -7.6 | 13.9 | 0.96 | 2.2 | 2.4 | 0.89 | -10.4 | 17.6 | 0.93 | 17.4 | 18.3 | 0.81 | -6.2 | 15.7 | 0.89 |
| LK | 16.0 | 16.1 | 0.92 | -0.4 | 23.2 | 0.94 | 2.0 | 2.6 | 0.75 | -28.3 | 29.7 | 0.75 | 14.8 | 13.0 | 0.53 | 15.3 | 28.4 | 0.71 |
| WL | 13.6 | 15.7 | 0.82 | -14.2 | 19.1 | 0.84 | 1.8 | 2.1 | 0.09 | -24.9 | 39.8 | 0.43 | 10.7 | 5.8 | 0.45 | 62.8 | 65.6 | 0.44 |
| XZ | 17.2 | 19.1 | 0.85 | -10.9 | 16.3 | 0.90 | 2.3 | 2.8 | 0.81 | -20.3 | 23.9 | 0.83 | 18.8 | 18.4 | 0.73 | 2.7 | 19.3 | 0.85 |
| TS | 16.4 | 15.8 | 0.88 | -1.3 | 18.9 | 0.92 | 1.7 | 2.1 | 0.41 | -21.7 | 32.9 | 0.60 | 10.5 | 9.7 | 0.47 | 8.6 | 29.8 | 0.68 |
| XD | 16.4 | 15.7 | 0.84 | 4.0 | 21.2 | 0.93 | 1.9 | 2.1 | 0.62 | -7.2 | 13.8 | 0.75 | 15.5 | 14.3 | 0.76 | 6.2 | 18.7 | 0.85 |
| XiZ | 18.0 | 17.5 | 0.83 | 2.4 | 15.7 | 0.94 | 2.9 | 3.2 | 0.90 | -10.7 | 11.7 | 0.92 | 17.1 | 18.4 | 0.68 | -6.7 | 19.9 | 0.80 |
| BQ | 18.5 | 18.4 | 0.92 | 1.1 | 17.4 | 0.93 | 3.4 | 4.3 | 0.77 | -19.4 | 26.3 | 0.81 | 16.9 | 20.6 | 0.77 | -22.9 | 24.3 | 0.77 |
| CL | 20.7 | 21.8 | 0.82 | -6.8 | 12.4 | 0.95 | 2.4 | 2.7 | 0.79 | -13.0 | 16.9 | 0.86 | 17.7 | 18.1 | 0.84 | -1.7 | 15.5 | 0.91 |
| TY | 19.3 | 21.0 | 0.85 | -10.8 | 19.2 | 0.93 | 3.9 | 4.7 | 0.77 | -19.3 | 23.5 | 0.82 | 13.3 | 16.8 | 0.65 | -20.6 | 25.9 | 0.67 |
| DY | 17.0 | 18.4 | 0.88 | -10.0 | 19.7 | 0.96 | 3.0 | 3.5 | 0.66 | -12.2 | 18.1 | 0.73 | 13.9 | 13.6 | 0.61 | 3.0 | 23.8 | 0.77 |
| GY | 15.8 | 15.6 | 0.84 | 0.6 | 19.2 | 0.96 | 2.8 | 3.3 | 0.78 | -15.4 | 19.5 | 0.81 | 12.3 | 8.1 | 0.77 | 43.7 | 43.7 | 0.66 |
| LT | 19.1 | 21.3 | 0.83 | -15.5 | 24.6 | 0.89 | 2.1 | 2.4 | 0.53 | -14.7 | 22.3 | 0.72 | 13.3 | 12.2 | 0.78 | 8.0 | 16.1 | 0.86 |
| PZ | 19.8 | 20.4 | 0.92 | -7.5 | 17.7 | 0.94 | 2.6 | 2.9 | 0.81 | -9.0 | 14.4 | 0.87 | 14.3 | 16.5 | 0.81 | -13.8 | 18.2 | 0.82 |
| HC | 17.7 | 16.2 | 0.82 | 5.6 | 21.6 | 0.84 | 2.0 | 2.2 | 0.75 | -7.0 | 14.7 | 0.85 | 9.0 | 12.3 | 0.55 | -30.7 | 30.8 | 0.58 |
| ZD | 16.7 | 16.4 | 0.85 | -2.5 | 19.8 | 0.89 | 1.7 | 1.7 | 0.86 | -2.5 | 13.2 | 0.92 | 10.5 | 9.0 | 0.48 | 15.4 | 25.6 | 0.64 |
| HK | 16.6 | 19.6 | 0.88 | -19.8 | 26.4 | 0.89 | 2.1 | 2.4 | 0.76 | -13.0 | 17.7 | 0.82 | 11.6 | 9.6 | 0.66 | 18.3 | 26.9 | 0.75 |
| ML | 19.9 | 23.7 | 0.84 | -20.6 | 24.0 | 0.85 | 1.9 | 2.3 | 0.82 | -17.6 | 20.5 | 0.86 | 12.5 | 11.7 | 0.77 | 5.1 | 18.5 | 0.82 |
| SY | 19.4 | 20.8 | 0.83 | -8.5 | 16.5 | 0.96 | 2.3 | 2.6 | 0.79 | -11.1 | 20.9 | 0.87 | 9.8 | 7.5 | 0.54 | 26.2 | 29.4 | 0.55 |
| TF | 17.1 | 14.2 | 0.92 | 19.9 | 27.6 | 0.89 | 1.3 | 1.5 | 0.56 | -18.6 | 36.6 | 0.73 | 13.3 | 11.9 | 0.40 | 8.9 | 25.2 | 0.61 |
| XT | 24.0 | 23.9 | 0.82 | -0.3 | 11.8 | 0.95 | 2.0 | 2.0 | 0.51 | -4.0 | 27.7 | 0.70 | 10.0 | 13.8 | 0.62 | -28.1 | 30.5 | 0.59 |
| ZM | 23.1 | 20.5 | 0.85 | 10.3 | 13.6 | 0.94 | 2.2 | 2.3 | 0.30 | -6.1 | 21.4 | 0.61 | 13.8 | 14.8 | 0.85 | -5.8 | 15.4 | 0.90 |
| FY | 20.6 | 23.2 | 0.88 | -15.6 | 20.1 | 0.92 | 1.4 | 2.3 | 0.79 | -24.4 | 24.4 | 0.74 | 8.8 | 11.1 | 0.76 | -23.0 | 25.3 | 0.75 |
| SaL | 18.3 | 15.3 | 0.84 | 18.4 | 25.9 | 0.89 | 2.2 | 2.0 | 0.48 | -0.6 | 33.5 | 0.67 | 11.7 | 12.6 | 0.79 | -7.5 | 16.4 | 0.87 |
| DL | 22.6 | 18.0 | 0.83 | 20.3 | 23.7 | 0.82 | 2.2 | 2.3 | 0.70 | -6.1 | 13.9 | 0.79 | 12.1 | 15.5 | 0.83 | -21.8 | 26.8 | 0.71 |
| CH | 22.5 | 22.9 | 0.92 | -3.0 | 13.1 | 0.95 | 2.4 | 2.8 | 0.52 | -12.5 | 32.5 | 0.70 | 9.8 | 12.9 | 0.81 | -27.0 | 28.4 | 0.78 |
| XX | 19.3 | 21.0 | 0.82 | -9.4 | 17.1 | 0.93 | 2.9 | 2.6 | 0.08 | 7.1 | 32.8 | 0.40 | 8.8 | 9.8 | 0.78 | -11.1 | 21.0 | 0.86 |
| EL | 22.5 | 22.2 | 0.85 | -1.2 | 13.7 | 0.90 | 2.1 | 3.1 | 0.27 | -40.0 | 45.7 | 0.52 | 10.6 | 8.0 | 0.48 | 26.6 | 33.4 | 0.59 |
| MaL | 19.5 | 18.6 | 0.88 | 4.1 | 12.6 | 0.95 | 1.6 | 1.9 | 0.66 | -16.7 | 25.2 | 0.77 | 10.4 | 8.3 | 0.62 | 22.0 | 26.4 | 0.65 |
| TX | 17.9 | 23.0 | 0.84 | -27.6 | 30.5 | 0.80 | 2.9 | 2.8 | 0.71 | -11.0 | 22.9 | 0.72 | 10.6 | 6.7 | 0.45 | 45.3 | 47.4 | 0.46 |
| LB | 23.7 | 24.5 | 0.83 | -5.0 | 13.9 | 0.94 | 1.9 | 2.4 | 0.52 | -18.5 | 22.5 | 0.62 | 13.3 | 8.2 | 0.08 | 44.0 | 47.4 | 0.32 |
| DoL | 28.5 | 26.6 | 0.92 | 2.8 | 17.6 | 0.88 | 2.2 | 2.4 | 0.89 | -7.1 | 16.8 | 0.90 | 12.6 | 11.0 | 0.57 | 16.4 | 24.3 | 0.71 |
| CY | 26.8 | 23.1 | 0.82 | 8.5 | 22.8 | 0.85 | 2.2 | 2.4 | 0.75 | -6.4 | 16.0 | 0.85 | 11.6 | 11.8 | 0.86 | -2.3 | 14.7 | 0.93 |
| XiG | 24.9 | 26.0 | 0.85 | -7.9 | 19.4 | 0.90 | 1.9 | 2.4 | 0.55 | -23.2 | 32.1 | 0.67 | 12.1 | 9.4 | 0.41 | 25.1 | 30.2 | 0.53 |
| PuZ | 20.6 | 21.6 | 0.88 | -11.2 | 26.9 | 0.86 | 2.0 | 2.6 | 0.00 | -25.0 | 29.1 | 0.39 | 9.5 | 8.1 | 0.38 | 16.1 | 25.7 | 0.54 |
| TN | 22.6 | 24.6 | 0.84 | -10.2 | 17.0 | 0.92 | 2.4 | 2.6 | 0.69 | -9.7 | 15.8 | 0.78 | 9.3 | 11.8 | 0.62 | -23.4 | 25.0 | 0.61 |
| XY | 24.5 | 19.4 | 0.83 | 19.2 | 23.5 | 0.82 | 2.1 | 2.3 | 0.79 | -6.9 | 13.9 | 0.86 | 9.0 | 10.9 | 0.67 | -19.8 | 23.6 | 0.70 |
| SH | 23.7 | 23.7 | 0.92 | -3.6 | 17.4 | 0.89 | 2.2 | 2.5 | 0.69 | -7.5 | 21.8 | 0.80 | 12.1 | 7.7 | 0.37 | 46.8 | 47.8 | 0.42 |
| AN | 22.4 | 23.8 | 0.82 | -8.2 | 19.4 | 0.88 | 2.1 | 2.3 | 0.35 | -13.9 | 23.1 | 0.59 | 9.0 | 11.5 | 0.45 | -24.0 | 26.6 | 0.56 |
| ZY | 19.0 | 20.4 | 0.85 | -13.4 | 21.5 | 0.92 | 2.5 | 2.7 | 0.70 | -10.5 | 13.0 | 0.78 | 9.7 | 10.9 | 0.82 | -10.2 | 19.2 | 0.84 |
| NZ | 24.2 | 26.4 | 0.88 | -10.9 | 16.5 | 0.91 | 2.5 | 2.4 | 0.54 | 1.1 | 18.6 | 0.72 | 14.1 | 12.1 | 0.73 | 15.6 | 18.2 | 0.78 |
| QJ | 19.9 | 22.4 | 0.84 | -14.8 | 20.8 | 0.94 | 2.1 | 2.5 | 0.64 | -20.1 | 23.6 | 0.70 | 12.8 | 11.0 | 0.75 | 18.6 | 24.8 | 0.79 |
| QZ | 19.1 | 19.0 | 0.83 | 1.1 | 18.3 | 0.95 | 2.1 | 2.6 | 0.60 | -21.8 | 27.5 | 0.70 | 16.8 | 16.6 | 0.80 | 1.8 | 11.3 | 0.88 |
| XG | 19.3 | 19.5 | 0.92 | -4.1 | 13.5 | 0.94 | 3.1 | 3.3 | 0.65 | -8.9 | 16.3 | 0.79 | 21.0 | 17.6 | 0.67 | 18.4 | 22.9 | 0.72 |
| LY | 17.5 | 21.4 | 0.82 | -22.0 | 24.4 | 0.89 | 2.5 | 3.1 | 0.66 | -24.8 | 33.1 | 0.73 | 9.8 | 9.9 | 0.76 | 0.1 | 27.3 | 0.87 |
| DaL | 21.1 | 28.1 | 0.85 | -31.9 | 32.4 | 0.81 | 2.6 | 4.5 | 0.62 | -52.4 | 53.0 | 0.56 | 12.1 | 14.0 | 0.74 | -16.2 | 21.7 | 0.79 |
| RW | 22.6 | 25.3 | 0.88 | -15.9 | 20.6 | 0.92 | 2.7 | 3.1 | 0.60 | -16.9 | 20.3 | 0.68 | 11.6 | 13.5 | 0.84 | -14.0 | 17.3 | 0.84 |
| QT | 24.6 | 29.4 | 0.84 | -18.2 | 20.9 | 0.88 | 2.0 | 2.3 | 0.66 | -14.8 | 21.4 | 0.73 | 9.8 | 11.4 | 0.74 | -13.6 | 17.3 | 0.79 |
| MN | 19.1 | 15.7 | 0.83 | 19.2 | 26.8 | 0.89 | 1.6 | 1.6 | 0.77 | -3.9 | 12.7 | 0.87 | 9.9 | 6.3 | 0.46 | 44.7 | 44.7 | 0.46 |
| PT | 23.1 | 24.4 | 0.92 | -8.6 | 17.1 | 0.92 | 2.0 | 2.2 | 0.73 | -8.4 | 15.5 | 0.80 | 7.9 | 10.8 | 0.42 | -31.2 | 32.2 | 0.51 |
| HeC | 8.4 | 11.6 | 0.82 | -32.6 | 34.4 | 0.68 | 1.3 | 1.4 | 0.80 | -9.7 | 18.3 | 0.87 | 5.2 | 2.1 | 0.25 | 81.2 | 81.2 | 0.24 |
| CZ | 19.9 | 23.9 | 0.85 | -21.0 | 24.9 | 0.87 | 1.8 | 2.2 | 0.66 | -20.4 | 23.9 | 0.76 | 10.4 | 8.4 | 0.51 | 22.1 | 26.6 | 0.62 |
| YL | 10.2 | 12.0 | 0.88 | -17.2 | 19.2 | 0.90 | 1.5 | 1.7 | 0.82 | -9.3 | 16.3 | 0.88 | 5.5 | 4.9 | 0.20 | 12.7 | 31.5 | 0.50 |
| DS | 10.4 | 12.7 | 0.84 | -21.6 | 25.1 | 0.84 | 1.6 | 1.8 | 0.91 | -12.8 | 13.2 | 0.90 | 10.1 | 6.4 | 0.47 | 43.7 | 46.8 | 0.48 |
| HL | 7.2 | 9.0 | 0.83 | -22.8 | 24.0 | 0.86 | 4.0 | 1.5 | -0.20 | -16.6 | 31.3 | 0.07 | 6.6 | 6.0 | 0.63 | 11.2 | 23.1 | 0.77 |
| TT | 9.6 | 10.9 | 0.92 | -14.9 | 18.9 | 0.93 | 1.2 | 1.2 | 0.47 | -3.2 | 15.7 | 0.65 | 9.9 | 4.6 | 0.16 | 70.4 | 70.4 | 0.20 |
| GS | 9.7 | 10.9 | 0.82 | -11.7 | 12.8 | 0.95 | 1.4 | 1.5 | 0.94 | -4.3 | 8.6 | 0.94 | 8.1 | 3.0 | 0.18 | 87.2 | 89.3 | 0.18 |
| NT | 25.8 | 24.7 | 0.85 | 4.7 | 17.6 | 0.91 | 1.7 | 1.9 | 0.69 | -13.3 | 20.0 | 0.77 | 14.2 | 13.2 | 0.82 | 10.1 | 18.2 | 0.88 |
| PL | 19.7 | 20.5 | 0.88 | -5.5 | 12.0 | 0.95 | 1.8 | 2.0 | 0.69 | -9.2 | 13.7 | 0.80 | 10.9 | 10.8 | 0.40 | 0.3 | 14.4 | 0.62 |
| ZuS | 26.7 | 25.5 | 0.84 | 2.6 | 17.5 | 0.90 | 1.9 | 2.2 | 0.73 | -12.6 | 20.0 | 0.79 | 13.2 | 10.2 | 0.36 | 27.7 | 36.0 | 0.56 |
| MG | 11.5 | 12.5 | 0.83 | -11.0 | 18.3 | 0.91 | 1.4 | 1.9 | 0.63 | -22.3 | 26.9 | 0.68 | 3.9 | - | - | - | - | - |
| Avg | 18.9 | 19.7 | 0.86 | -6.9 | 20.0 | 0.92 | 2.1 | 2.4 | 0.71 | -14.2 | 22.8 | 0.82 | 11.9 | 11.7 | 0.77 | 7.6 | 29.1 | 0.87 |
| Compliance rate |  |  | 100% | 100% | 100% |  |  |  | 87% | 100% | 100% |  |  |  | 82% | 96% | 99% |  |

Note：The above 69 air quality monitoring sites in western-middle Taiwan are listed from north to south.

| station | Abbreviations | station | Abbreviations | station | Abbreviations |
| --- | --- | --- | --- | --- | --- |
| Annan | AN | Lunbei | LB | Toufen | TF |
| Banqiao | BQ | Magong | MG | Tucheng | TuC |
| Cailiao | CL | Mailiao | MaL | Wanhua | WH |
| Changhua | CH | Meinong | MN | Wanli | WL |
| Chaozhou | CZ | Miaoli | ML | Xianxi | XX |
| Chiayi | CY | Nantou | NT | Xiaogang | XG |
| Dali | DL | Nanzi | NZ | Xindian | XD |
| Daliao | DaL | Pingtung | PT | Xingang | XiG |
| Dayuan | DY | Pingzhen | PZ | Xinying | XY |
| Dongshan | DS | Puli | PL | Xinzhuang | XiZ |
| Douliu | DoL | Puzi | PuZ | Xitun | XT |
| Erlin | EL | Qianjin | QJ | Xizhi | XZ |
| Fengyuan | FY | Qianzhen | QZ | Yangming | YM |
| Fugueicape | FG | Qiaotou | QT | Yilan | YL |
| Guanshan | GS | Renwu | RW | Zhongming | ZM |
| Guanyin | GY | Sanyi | SY | Zhongshan | ZS |
| Guting | GT | Shalu | SaL | Zhudong | ZD |
| Hengchun | HeC | Shanhua | SH | Zhushan | ZuS |
| Hsinchu | HC | Shilin | SiL | Zuoying | ZY |
| Hualien | HL | Songshan | SS |  |  |
| Hukou | HK | Tainan | TN |  |  |
| Keelung | KE | Taitung | TT |  |  |
| Linkou | LK | Taixi | TX |  |  |
| Linyuan | LY | Tamsui | TS |  |  |
| Longtan | LT | Taoyuan | TY |  |  |

Note: The full names and their abbreviations are listed in order of starting alphabet from A to Z. The measurement brands for PM2.5, SO2, NO/NO2, O3, NMHCs and NH3 are BAM-1020 VEREWA-F-701 (Met One Instruments Inc., Durag Group), EC9850 (Ecotech PVT Ltd.), EC9841 (Ecotech PVT Ltd.), EC9810 (Ecotech PVT Ltd.), Horiba-APHA 360 (Horiba Ltd.), and Serinus-44 (Ecotech PVT Ltd.), respectively.

Table S4 The performance of chemical modeling results for domain 4 from 01 April to 30 April 2019 (2/2)

| hourly | NMHC | | | | | | O3 all | | | | | | | O3 above 40ppb | | | | | | |
| --- | --- | --- | --- | --- | --- | --- | --- | --- | --- | --- | --- | --- | --- | --- | --- | --- | --- | --- | --- | --- |
| Standard  Sta. | Avg  Mod  (ppb) | Avg  Obs  (ppb-3) | r  (>0.35) | MNB  (-40  |  50) | MNE  (<80) | IOA | Avg  Mod  (ppb) | Avg  Obs  (ppb-3) | r | MNB | MNE | MPNB | IOA | Avg  Mod  (ppb) | Avg  Obs  (ppb) | r  (>0.45) | MNB  (±15) | MNE  (<35) | MPNB  (±10) | IOA |
| FG | 0.03 | 0.03 | 0.60 | 21.2 | 52.2 | 0.73 | 47.9 | 48.1 | 0.74 | 8.9 | 24.5 | -1.5 | 0.84 | 52.1 | 55.8 | 0.50 | -5.5 | 14.0 | -3.9 | 0.68 |
| KE | 0.08 | 0.11 | 0.55 | -9.2 | 47.7 | 0.70 | 37.2 | 37.4 | 0.75 | 41.5 | 73.9 | -1.2 | 0.86 | 48.5 | 56.0 | 0.47 | -12.8 | 20.2 | -7.3 | 0.60 |
| YM | - | - | - | - | - | - | 49.2 | 48.9 | 0.63 | 5.0 | 19.6 | 1.7 | 0.79 | 52.4 | 54.6 | 0.45 | -3.0 | 14.4 | 1.5 | 0.66 |
| WH | - | - | - | - | - | - | 38.9 | 31.9 | 0.77 | 202.5 | 217.2 | 13.7 | 0.85 | 55.3 | 53.6 | 0.60 | 4.0 | 20.6 | 9.8 | 0.75 |
| ZS | 0.15 | 0.19 | 0.76 | -19.4 | 30.6 | 0.81 | 37.0 | 31.6 | 0.75 | 115.4 | 135.1 | 13.0 | 0.85 | 54.3 | 53.3 | 0.58 | 2.8 | 19.9 | 8.1 | 0.74 |
| GT | 0.13 | 0.17 | 0.77 | -17.9 | 30.8 | 0.80 | 39.4 | 35.9 | 0.8 | 50.3 | 69.4 | 6.0 | 0.88 | 52.9 | 55.4 | 0.71 | -4.4 | 17.5 | 0.9 | 0.82 |
| SS | 0.10 | 0.15 | 0.69 | -19.3 | 35.9 | 0.75 | 38.7 | 33.8 | 0.75 | 63.7 | 83.8 | 5.3 | 0.85 | 53.1 | 54.7 | 0.65 | -2.8 | 18.0 | 0.5 | 0.77 |
| SiL | - | - | - | - | - | - | 41.6 | 41.8 | 0.72 | 60.2 | 87.0 | -4.4 | 0.83 | 50.5 | 59.2 | 0.53 | -13.7 | 20.5 | -6.3 | 0.65 |
| TuC | 0.15 | 0.18 | 0.65 | -13.6 | 36 | 0.79 | 38.0 | 35.3 | 0.78 | 71.2 | 98.1 | 5.9 | 0.88 | 53.0 | 56.7 | 0.68 | -6.3 | 19.7 | 2.5 | 0.80 |
| LK | - | - | - | - | - | - | 39.0 | 42.6 | 0.75 | 5.4 | 38.7 | -3.1 | 0.85 | 46.9 | 54.9 | 0.55 | -14.3 | 20.5 | -3.4 | 0.65 |
| WL | - | - | - | - | - | - | 39.6 | 46.5 | 0.71 | -5.7 | 33.7 | -11.3 | 0.81 | 47.5 | 60.3 | 0.51 | -20.7 | 23.6 | -12.1 | 0.58 |
| XZ | - | - | - | - | - | - | 34.6 | 33.3 | 0.78 | 46.6 | 82.3 | 5.8 | 0.88 | 50.6 | 54.5 | 0.65 | -7.8 | 20.5 | -0.6 | 0.74 |
| TS | - | - | - | - | - | - | 42.2 | 40.6 | 0.71 | 48.0 | 68.1 | -4.5 | 0.82 | 50.9 | 57.3 | 0.49 | -9.7 | 15.9 | -6.6 | 0.65 |
| XD | - | - | - | - | - | - | 39.5 | 36.2 | 0.78 | 43.9 | 68.2 | 10.2 | 0.88 | 55.0 | 56.3 | 0.72 | -2.3 | 18.1 | 5.6 | 0.83 |
| XiZ | - | - | - | - | - | - | 39.5 | 35.0 | 0.76 | 109.4 | 127.2 | 10.8 | 0.86 | 51.0 | 52.4 | 0.66 | -2.7 | 16.6 | 7.0 | 0.76 |
| BQ | 0.17 | 0.23 | 0.76 | -21.3 | 30.4 | 0.78 | 41.5 | 31.4 | 0.8 | 106.9 | 115.0 | 23.0 | 0.84 | 60.0 | 53.0 | 0.63 | 14.3 | 21.3 | 19.9 | 0.73 |
| CL | - | - | - | - | - | - | 39.6 | 34.9 | 0.78 | 67.2 | 85.7 | 17.0 | 0.87 | 52.6 | 52.0 | 0.62 | 1.2 | 18.2 | 15.5 | 0.75 |
| TY | 0.11 | 0.16 | 0.64 | -19.7 | 34.8 | 0.66 | 41.8 | 29.2 | 0.72 | 108.4 | 113.9 | 37.9 | 0.73 | 57.6 | 47.2 | 0.58 | 21.8 | 25.8 | 30.5 | 0.52 |
| DY | - | - | - | - | - | - | 38.4 | 43.0 | 0.74 | 0.7 | 32.9 | -4.2 | 0.84 | 46.2 | 55.2 | 0.60 | -16.3 | 21.0 | -6.3 | 0.65 |
| GY | - | - | - | - | - | - | 39.1 | 42.2 | 0.76 | 3.0 | 28.4 | -0.1 | 0.86 | 46.5 | 53.2 | 0.56 | -12.4 | 17.6 | -3.3 | 0.65 |
| LT | - | - | - | - | - | - | 41.3 | 39.0 | 0.74 | 24.0 | 42.0 | 5.4 | 0.85 | 50.7 | 54.1 | 0.67 | -6.0 | 17.7 | 5.2 | 0.78 |
| PZ | - | - | - | - | - | - | 40.7 | 37.2 | 0.75 | 41.9 | 57.9 | 11.8 | 0.85 | 51.4 | 53.1 | 0.62 | -2.9 | 17.7 | 10.1 | 0.75 |
| HC | 0.09 | 0.12 | 0.64 | -21.9 | 32.9 | 0.71 | 43.3 | 36.1 | 0.77 | 57.8 | 65.5 | 8.5 | 0.84 | 55.1 | 54.5 | 0.56 | 2.2 | 15.4 | 1.9 | 0.74 |
| ZD | - | - | - | - | - | - | 40.1 | 35.5 | 0.74 | 27.7 | 45.8 | 9.3 | 0.84 | 53.3 | 53.8 | 0.62 | -0.1 | 18.5 | 6.5 | 0.77 |
| HK | - | - | - | - | - | - | 40.2 | 41.6 | 0.82 | 9.9 | 31.8 | -0.5 | 0.90 | 49.6 | 56.0 | 0.67 | -11.2 | 17.1 | -3.4 | 0.75 |
| ML | - | - | - | - | - | - | 38.5 | 26.8 | 0.74 | 149.3 | 155.8 | 37.4 | 0.74 | 59.3 | 47.7 | 0.52 | 24.8 | 28.1 | 28.3 | 0.51 |
| SY | - | - | - | - | - | - | 40.3 | 36.1 | 0.74 | 22.6 | 38.0 | 14.3 | 0.84 | 53.2 | 51.9 | 0.62 | 2.7 | 19.7 | 10.2 | 0.74 |
| TF | 0.07 | 0.08 | 0.61 | -1.1 | 42.5 | 0.72 | 38.1 | 30.5 | 0.82 | 40.1 | 48.2 | 20.9 | 0.86 | 55.8 | 50.0 | 0.49 | 12.2 | 19.6 | 13.9 | 0.62 |
| XT | 0.10 | 0.15 | 0.56 | -17.0 | 36.2 | 0.58 | 43.6 | 33.4 | 0.79 | 74.5 | 79.6 | 18.5 | 0.83 | 58.3 | 54.2 | 0.68 | 8.3 | 17.9 | 15.0 | 0.79 |
| ZM | 0.10 | 0.14 | 0.66 | -18.8 | 34.7 | 0.67 | 39.7 | 31.0 | 0.78 | 84.5 | 93.0 | 21.4 | 0.84 | 58.8 | 54.5 | 0.71 | 8.6 | 17.8 | 15.1 | 0.81 |
| FY | 0.07 | 0.13 | 0.43 | -19.0 | 48.2 | 0.53 | 46.0 | 34.1 | 0.75 | 75.8 | 80.9 | 18.6 | 0.79 | 61.5 | 55.9 | 0.70 | 11.1 | 18.8 | 14.5 | 0.79 |
| SaL | - | - | - | - | - | - | 39.6 | 35.3 | 0.76 | 35.1 | 48.7 | 6.3 | 0.85 | 51.5 | 53.4 | 0.63 | -2.9 | 16.0 | 0.7 | 0.77 |
| DL | 0.11 | 0.17 | 0.62 | -23.9 | 38.2 | 0.60 | 42.9 | 28.8 | 0.76 | 279.9 | 283.7 | 28.6 | 0.79 | 64.6 | 58.4 | 0.72 | 12.5 | 18.8 | 16.0 | 0.81 |
| CH | 0.09 | 0.14 | 0.63 | -24.0 | 37.1 | 0.65 | 42.2 | 30.7 | 0.73 | 96.1 | 101.7 | 29.2 | 0.77 | 58.9 | 52.8 | 0.62 | 12.3 | 20.5 | 17.5 | 0.72 |
| XX | 0.05 | 0.21 | 0.24 | -7.3 | 65.5 | 0.28 | 41.5 | 38.2 | 0.78 | 26.9 | 39.9 | 5.9 | 0.87 | 52.0 | 55.6 | 0.69 | -6.2 | 15.7 | -1.6 | 0.80 |
| EL | - | - | - | - | - | - | 38.6 | 29.7 | 0.79 | 53.5 | 63.4 | 32.5 | 0.83 | 58.5 | 50.4 | 0.60 | 16.1 | 23.2 | 18.6 | 0.64 |
| MaL | 0.04 | 0.07 | 0.43 | -23.8 | 45.4 | 0.52 | 39.3 | 33.6 | 0.79 | 35.7 | 44.4 | 15.4 | 0.86 | 53.0 | 52.4 | 0.66 | 1.4 | 15.0 | 4.5 | 0.78 |
| TX | 0.03 | 0.04 | 0.29 | 31.3 | 77.4 | 0.46 | 38.6 | 41.2 | 0.77 | 5.3 | 33.6 | -2.8 | 0.87 | 48.4 | 57.1 | 0.61 | -14.7 | 19.6 | -10.0 | 0.68 |
| LB | - | - | - | - | - | - | 35.1 | 35.2 | 0.78 | 9.9 | 38.8 | 9.8 | 0.88 | 50.9 | 55.9 | 0.67 | -9.3 | 19.4 | 0.4 | 0.74 |
| DoL | - | - | - | - | - | - | 39.7 | 34.3 | 0.74 | 48.0 | 64.1 | 12.5 | 0.84 | 56.2 | 58.5 | 0.61 | -2.6 | 18.8 | 3.3 | 0.77 |
| CY | 0.08 | 0.11 | 0.77 | -15.7 | 32.2 | 0.80 | 39.8 | 31.4 | 0.8 | 56.1 | 65.2 | 20.2 | 0.85 | 59.9 | 56.1 | 0.59 | 7.7 | 18.4 | 11.6 | 0.74 |
| XiG | - | - | - | - | - | - | 36.4 | 30.1 | 0.84 | 37.2 | 51.8 | 30.6 | 0.89 | 58.3 | 53.0 | 0.60 | 10.6 | 20.3 | 17.0 | 0.71 |
| PuZ | - | - | - | - | - | - | 38.9 | 32.4 | 0.82 | 40.4 | 49.6 | 19.2 | 0.87 | 56.2 | 54.1 | 0.61 | 4.2 | 17.0 | 7.0 | 0.75 |
| TN | 0.08 | 0.11 | 0.71 | -20.1 | 32.1 | 0.74 | 39.4 | 36.7 | 0.81 | 22.7 | 37.2 | 1.3 | 0.88 | 53.0 | 57.5 | 0.63 | -6.7 | 15.4 | -5.1 | 0.76 |
| XY | 0.06 | 0.08 | 0.65 | -15.8 | 34.4 | 0.70 | 40.8 | 32.1 | 0.8 | 54.4 | 61.2 | 24.6 | 0.84 | 58.9 | 54.6 | 0.48 | 9.5 | 21.4 | 16.4 | 0.68 |
| SH | - | - | - | - | - | - | 37.1 | 32.4 | 0.82 | 47.2 | 59.3 | 7.9 | 0.89 | 54.1 | 57.3 | 0.66 | -4.9 | 15.3 | 3.8 | 0.79 |
| AN | 0.07 | 0.14 | 0.40 | -1.7 | 55.6 | 0.46 | 39.6 | 36.7 | 0.84 | 22.4 | 36.2 | 2.5 | 0.90 | 54.8 | 59.0 | 0.71 | -6.1 | 13.9 | -3.2 | 0.82 |
| ZY | 0.07 | 0.11 | 0.64 | -9.1 | 47.8 | 0.71 | 39.4 | 36.6 | 0.79 | 28.6 | 45.2 | 0.3 | 0.87 | 55.5 | 60.9 | 0.55 | -7.5 | 16.9 | -2.4 | 0.71 |
| NZ | 0.10 | 0.14 | 0.52 | -17.3 | 29.8 | 0.62 | 35.5 | 32.3 | 0.8 | 37.1 | 54.7 | 6.6 | 0.89 | 52.8 | 57.8 | 0.62 | -7.7 | 16.8 | 1.6 | 0.75 |
| QJ | 0.07 | 0.10 | 0.72 | -17.0 | 40.1 | 0.76 | 36.5 | 36.9 | 0.78 | 11.3 | 38.3 | -1.3 | 0.87 | 51.8 | 59.6 | 0.55 | -11.7 | 20.5 | -5.8 | 0.68 |
| QZ | 0.09 | 0.13 | 0.64 | -17.6 | 40.5 | 0.72 | 33.5 | 31.9 | 0.8 | 22.6 | 46.4 | 13.4 | 0.89 | 51.6 | 55.7 | 0.53 | -6.6 | 17.6 | 2.7 | 0.70 |
| XG | 0.10 | 0.14 | 0.64 | -21.4 | 36.4 | 0.68 | 30.0 | 30.2 | 0.77 | 10.0 | 47.8 | 11.9 | 0.87 | 48.2 | 55.0 | 0.64 | -12.9 | 19.8 | -5.7 | 0.69 |
| LY | 0.06 | 0.10 | 0.29 | 51.3 | 98.3 | 0.39 | 39.3 | 38.0 | 0.77 | 23.1 | 44.3 | 1.3 | 0.87 | 54.0 | 61.2 | 0.58 | -10.6 | 19.3 | -3.7 | 0.72 |
| DaL | 0.09 | 0.15 | 0.51 | -29.4 | 42.3 | 0.59 | 37.7 | 31.1 | 0.79 | 65.7 | 75.6 | 10.3 | 0.86 | 56.4 | 59.5 | 0.58 | -3.5 | 16.5 | 0.1 | 0.75 |
| RW | 0.08 | 0.12 | 0.68 | -10.2 | 44.1 | 0.72 | 38.2 | 33.8 | 0.81 | 33.0 | 46.9 | 8.2 | 0.88 | 55.4 | 57.7 | 0.63 | -2.9 | 15.0 | 2.6 | 0.78 |
| QT | - | - | - | - | - | - | 39.4 | 34.5 | 0.79 | 47.6 | 59.9 | 4.4 | 0.86 | 55.2 | 59.4 | 0.59 | -5.3 | 17.1 | -3.2 | 0.75 |
| MN | - | - | - | - | - | - | 36.9 | 29.9 | 0.84 | 35.5 | 53.6 | 19.7 | 0.88 | 58.5 | 53.6 | 0.63 | 9.8 | 19.9 | 16.3 | 0.74 |
| PT | 0.06 | 0.09 | 0.57 | -19.1 | 34.1 | 0.65 | 43.0 | 38.2 | 0.82 | 32.2 | 42.1 | -0.7 | 0.88 | 56.8 | 59.1 | 0.68 | -2.1 | 16.1 | -2.9 | 0.82 |
| HeC | - | - | - | - | - | - | 37.9 | 44.8 | 0.69 | -11.0 | 23.1 | -8.2 | 0.77 | 43.3 | 54.9 | 0.50 | -20.5 | 22.8 | -14.7 | 0.55 |
| CZ | - | - | - | - | - | - | 36.7 | 34.7 | 0.76 | 32.5 | 56.6 | -0.6 | 0.86 | 52.9 | 60.3 | 0.62 | -11.7 | 21.9 | -5.1 | 0.73 |
| YL | - | - | - | - | - | - | 45.1 | 37.7 | 0.78 | 36.0 | 40.4 | 9.9 | 0.79 | 52.2 | 51.1 | 0.44 | 3.0 | 11.8 | 6.8 | 0.67 |
| DS | - | - | - | - | - | - | 39.2 | 33.9 | 0.76 | 30.4 | 40.8 | 10.5 | 0.83 | 48.5 | 49.2 | 0.35 | -0.7 | 14.6 | 7.5 | 0.59 |
| HL | - | - | - | - | - | - | 41.9 | 35.1 | 0.64 | 42.9 | 51.1 | 5.9 | 0.73 | 49.2 | 51.6 | 0.17 | -3.6 | 14.3 | -0.6 | 0.50 |
| TT | - | - | - | - | - | - | 35.0 | 24.8 | 0.68 | 50.5 | 57.0 | 47.4 | 0.66 | 53.3 | 41.7 | -0.52 | 28.4 | 29.7 | 32.0 | 0.08 |
| GS | - | - | - | - | - | - | 35.4 | 26.6 | 0.65 | 53.0 | 63.0 | 38.2 | 0.72 | 45.2 | 42.8 | 0.14 | 5.8 | 17.7 | 14.0 | 0.28 |
| NT | 0.08 | 0.10 | 0.65 | 14.3 | 57.8 | 0.72 | 40.2 | 22.0 | 0.77 | 143.9 | 148.2 | 69.8 | 0.69 | 70.6 | 49.7 | 0.62 | 42.5 | 42.6 | 47.3 | 0.40 |
| PL | - | - | - | - | - | - | 47.7 | 34.5 | 0.83 | 78.7 | 82.7 | 23.4 | 0.83 | 66.4 | 59.0 | 0.65 | 15.1 | 20.4 | 16.7 | 0.76 |
| ZuS | - | - | - | - | - | - | 40.7 | 30.8 | 0.77 | 94.2 | 108.2 | 23.4 | 0.84 | 63.0 | 60.1 | 0.66 | 6.0 | 17.3 | 10.3 | 0.79 |
| MG | - | - | - | - | - | - | 46.1 | 50.3 | 0.79 | -3.1 | 19.2 | -6.0 | 0.85 | 52.1 | 59.3 | 0.53 | -10.9 | 15.9 | -10.4 | 0.65 |
| Avg | 0.09 | 0.13 | 0.53 | -12.5 | 42.1 | 0.61 | 39.6 | 35.2 | 0.75 | 51.0 | 67.5 | 11.6 | 0.85 | 57.3 | 57.0 | 0.51 | 2.3 | 15.8 | 6.5 | 0.72 |
| Compliance rate |  |  | 91% | 97% | 97% |  |  |  | 100% | 19% | 13% | 51% |  |  |  | 93% | 87% | 99% | 64% |  |

Note：The above 69 air quality monitoring sites in western-middle Taiwan are listed from north to south.

| station | Abbreviations | station | Abbreviations | station | Abbreviations |
| --- | --- | --- | --- | --- | --- |
| Annan | AN | Lunbei | LB | Toufen | TF |
| Banqiao | BQ | Magong | MG | Tucheng | TuC |
| Cailiao | CL | Mailiao | MaL | Wanhua | WH |
| Changhua | CH | Meinong | MN | Wanli | WL |
| Chaozhou | CZ | Miaoli | ML | Xianxi | XX |
| Chiayi | CY | Nantou | NT | Xiaogang | XG |
| Dali | DL | Nanzi | NZ | Xindian | XD |
| Daliao | DaL | Pingtung | PT | Xingang | XiG |
| Dayuan | DY | Pingzhen | PZ | Xinying | XY |
| Dongshan | DS | Puli | PL | Xinzhuang | XiZ |
| Douliu | DoL | Puzi | PuZ | Xitun | XT |
| Erlin | EL | Qianjin | QJ | Xizhi | XZ |
| Fengyuan | FY | Qianzhen | QZ | Yangming | YM |
| Fugueicape | FG | Qiaotou | QT | Yilan | YL |
| Guanshan | GS | Renwu | RW | Zhongming | ZM |
| Guanyin | GY | Sanyi | SY | Zhongshan | ZS |
| Guting | GT | Shalu | SaL | Zhudong | ZD |
| Hengchun | HeC | Shanhua | SH | Zhushan | ZuS |
| Hsinchu | HC | Shilin | SiL | Zuoying | ZY |
| Hualien | HL | Songshan | SS |  |  |
| Hukou | HK | Tainan | TN |  |  |
| Keelung | KE | Taitung | TT |  |  |
| Linkou | LK | Taixi | TX |  |  |
| Linyuan | LY | Tamsui | TS |  |  |
| Longtan | LT | Taoyuan | TY |  |  |

Note: The full names and their abbreviations are listed in order of starting alphabet from A to Z.

Table S5 Performance statistics for general air pollutants for CMAQ in domain 4 (69 stations) during 01 April to 30 April 2019.

|  |  | No. | Frequency | Metrics | | | | | | | | | |
| --- | --- | --- | --- | --- | --- | --- | --- | --- | --- | --- | --- | --- | --- |
|  |  |  |  | r | Obs | Mod | MB | MNB | MNE | MFB | MFE | MPNB | IOA |
|  |  |  |  |  |  |  |  | (%) | (%) | (%) | (%) | (%) |  |
| PM10 | µg m-3 | 2,139 | 24-hr | 0.87 | 37.5 | 33.2 | -4.3 | -10.3 | 17.8 | -13.1 | 19.4 | - | 0.91 |
| Benchmark |  |  |  | >0.5 | - | - | - | - | - | <±35 | <55 | - | - |
| PM2.5 | µg m-3 | 2,138 | 24-hr | 0.86 | 19.7 | 18.9 | -0.9 | -3.5 | 19.6 | -6.9 | 20.0 | - | 0.92 |
| Benchmark |  |  |  | >0.5 | - | - | - | - | - | <±35 | <55 | - | - |
| SO2 | ppb | 2,110 | 24-hr | 0.71 | 2.4 | 2.1 | -0.3 | -9.3 | 21.3 | -14.2 | 22.8 | - | 0.82 |
| Benchmark |  |  |  | >0.45 | - | - | - | - | - | <±65 | <85 | - | - |
| NO2 | ppb | 2,105 | 24-hr | 0.77 | 11.7 | 11.9 | 0.3 | 18.7 | 37.0 | 7.6 | 29.1 | - | 0.87 |
| Benchmark |  |  |  | >0.45 | - | - | - | - | - | <±65 | <85 | - | - |
| NO | ppb | 2,099 | 24-hr | 0.73 | 2.3 | 2.0 | -0.2 | 0.6 | 29.2 | -6.7 | 29.8 | - | 0.83 |
| O3 all | ppb | 50,647 | 1-hr | 0.75 | 35.2 | 39.6 | 4.4 | 51.0 | 67.5 | 16.4 | 37.6 | 11.6 | 0.85 |
| O3≥40 | ppb | 16,378 | 1-hr | 0.51 | 57.0 | 57.3 | 0.2 | 2.3 | 15.8 | 0.3 | 15.3 | 6.5 | 0.72 |
| Benchmark |  |  |  | >0.45 | - | - | - | <±15 | - | - | - | <±10 | - |
| NO2 | ppb | 49,316 | 1-hr | 0.54 | 11.6 | 12.0 | 0.4 | 32.4 | 74.3 | -3.7 | 53.7 | - | 0.72 |
| Benchmark |  |  |  | >0.45 | - | - | - | -40~50 | <80 | - | - | - | - |
| NO | ppb | 47,588 | 1-hr | 0.50 | 2.3 | 2.1 | -0.2 | 4.7 | 74.7 | -35.4 | 75.0 | - | 0.68 |
| NMHC | ppm | 22,509 | 1-hr | 0.53 | 0.13 | 0.09 | -0.04 | -12.5 | 42.1 | -27.9 | 46.3 | - | 0.61 |
| Benchmark |  |  |  | >0.45 | - | - | - | -40~50 | <80 | - | - | - | - |
| CO | ppb | 50,048 | 1-hr | 0.63 | 0.4 | 0.3 | -0.06 | -13.2 | 26.1 | -18.9 | 28.9 | - | 0.76 |
| NH3 | ppb | 2,781 | 1-hr | 0.75 | 19.1 | 16.4 | -2.8 | 1.0 | 53.9 | -22.2 | 56.0 | - | 0.86 |

Note: Only those pollutants listed in “Taiwan Air Quality Modeling Norm” have benchmark levels.

Table S6 The performance statistics for PM2.5 and PM2.5 species for CMAQ in domain 4 (6 stations) on PM2.5 sampling days on 03, 09, 15, 21, 27 April 2019.

|  | No. | Metrics | Values | Range | Benchmark level | | | |
| --- | --- | --- | --- | --- | --- | --- | --- | --- |
|  |  |  |  |  | criteria | | goal | |
|  |  |  |  |  | Emery et al. (2017) | Huang et al. (2021) | Emery et al. (2017) | Huang et al. (2021) |
| PM2.5 | 29 | r | 0.90 | 0.86~1.00 | >0.40 | >0.6a | >0.70 | >0.7a |
|  |  | NMB | -2.0% | -42.3%~16.1% | <±30% | <±20% | <±10% | <±10% |
|  |  | NME | 21.2% | 13.9%~42.3% | <50% | <45% | <35% | <35% |
|  |  | IOA | 0.91 | 0.69~0.91 | None | >0.7 | None | >0.8 |
|  |  | FB | -2.0% | -53.6%~14.9% | None | <±25% | None | <±15% |
|  |  | FE | 21.4% | 13.2%~53.6% | None | <55% | None | <40% |
| SO42- | 29 | r | 0.68 | 0.46~0.97 | >0.40 | >0.65 | >0.70 | >0.75 |
|  |  | NMB | -52.4% | -62.2%~ -42.1% | <±30% | <±45% | <±10% | <±20% |
|  |  | NME | 52.7% | 43.6%~62.2% | <50% | <55% | <35% | <45% |
|  |  | IOA | 0.51 | 0.42~0.60 | None | >0.65 | None | >0.75 |
|  |  | FB | -71.0% | -90.3%~ -53.4% | None | <±50% | None | <±40% |
|  |  | FE | 71.4% | 55.2%~90.3% | None | <75% | None | <65% |
| NH4+ | 29 | r | 0.66 | 0.17~0.85 | >0.40 | >0.65 | >0.70 | >0.75 |
|  |  | NMB | -30.7% | -73.0%~ -5.7% | <±30% | <±35% | <±10% | <±15% |
|  |  | NME | 44.2% | 31.7%~73.0% | <50% | <55% | <35% | <45% |
|  |  | IOA | 0.73 | 0.52~0.83 | None | >0.65 | None | >0.75 |
|  |  | FB | -36.3% | -115.0%~ -5.9% | None | <±45% | None | <±20% |
|  |  | FE | 52.2% | 32.6%~115.0% | None | <75% | None | <65% |
| NO3- | 29 | r | 0.81 | -0.44-0.99 | None | >0.60 | None | >0.70 |
|  |  | NMB | 39.7% | -47.6%~79.0% | <±65% | <±60% | <±15% | <±20% |
|  |  | NME | 72.3% | 32.2%~98.3% | <115% | <75% | <65% | <50% |
|  |  | IOA | 0.80 | 0.03~0.91 | None | >0.5 | None | >0.85 |
|  |  | FB | 33.2% | -62.5%~56.6% | None | <±75% | None | <±20% |
|  |  | FE | 60.3% | 32.8%~76.2% | None | <80% | None | <60% |
| OC | 29 | r | 0.63 | 0.03-0.85 | None | >0.55 | None | >0.65 |
|  |  | NMB | 17.7% | -65.0%~93.6% | <±50% | <±55% | <±15% | <±35% |
|  |  | NME | 56.5% | 39.0%~93.6% | <65% | <60% | <45% | <40% |
|  |  | IOA | 0.65 | 0.34~0.71 | None | >0.55 | None | >0.75 |
|  |  | FB | 16.3% | -96.4%~63.7% | None | <±45% | None | <±25% |
|  |  | FE | 51.9% | 32.6%~96.4% | None | <55% | None | <45% |
| EC | 29 | r | 0.44 | -0.88-0.83 | None | >0.45 | None | >0.65 |
|  |  | NMB | 21.7% | -36.5%~153.1% | <±40% | <±35% | <±20% | <±20% |
|  |  | NME | 94.7% | 62.8%~175.0% | <75% | <60% | <50% | <45% |
|  |  | IOA | 0.39 | 0.00~0.70 | None | None | None | None |
|  |  | FB | 19.6% | -44.6%~86.7% | None | <±55% | None | <±15% |
|  |  | FE | 85.5% | 57.0%~102.8% | None | <50% | None | <45% |

a.The values for 1-hr data is only for PM2.5, which is recommended by Huang et al. (2021).

b. References:

Emery, C., Liu, Z., Russell, A.G., Odman, M. T., Yarwood, G., Kumar, N., 2017. Recommendations on statistics and benchmarks to assess photochemical model performance, J. Air. Waste. Manage. Associa. 67:5, 582-598.

Huang, L., Zhu, Y., Zhai, H., Xue, S., Zhu, T., Shao, Y., Liu, Z., Emery, C., Yarwood, G., Wang, Y., Fu, J., Zhang, K., Li, L., 2021. Recommendations on benchmarks for numerical air quality model applications in China – Part 1: PM2.5 and chemical species. Atmos. Chem. Phys. 21, 2725-2743.

Table S7 Performance statistics of volatile organic compounds for CMAQ in domain 4.

|  | No. | Obs | Mod | r | MB | MNB | MNE | IOA |
| --- | --- | --- | --- | --- | --- | --- | --- | --- |
|  |  | (ppb) | (ppb) |  | (ppb) | (%) | (%) |  |
| ETHA | 8,235 | 2.9 | 2.3 | 0.71 | -0.6 | -17.5 | 33.6 | 0.81 |
| ISOP | 8,125 | 1.4 | 0.9 | 0.36 | -0.5 | -19.3 | 55.9 | 0.45 |
| PRPA | 8,220 | 2.2 | 1.5 | 0.43 | -0.7 | -18.7 | 43.0 | 0.58 |
| XYL | 7,378 | 1.2 | 0.8 | 0.26 | -0.4 | -17.9 | 43.9 | 0.26 |
| ETH | 6,811 | 0.2 | 0.1 | 0.40 | -0.06 | -19.7 | 66.3 | 0.54 |
| ETHY | 7,933 | 0.3 | 0.2 | 0.35 | -0.1 | -14.2 | 52.5 | 0.53 |
| TOL | 8,160 | 2.6 | 1.7 | 0.63 | -0.9 | -18.4 | 49.5 | 0.72 |
| BENZENE | 7,853 | 0.9 | 0.6 | 0.61 | -0.3 | -19.1 | 47.2 | 0.75 |

The data monitored at PAMS stations from 01 April to 30 April 2019. The frequency and unit are 1 hour and ppb, respectively. The 12 stations include Wangua, Tucheng, Pingzhen, Zhongming, Zhushan, Taixi, Puzi, Tainan, Qiaotou, Xiaogang, Chiaotou, Linyuan. The eight items include ethane (ETHA), isoprene (ISOP), propane (PRPA), xylenes (XYL), ethene (ETH), ethyne (ETHY), toluene (TOL), and Benzene (BENZENE).

(a) (b)


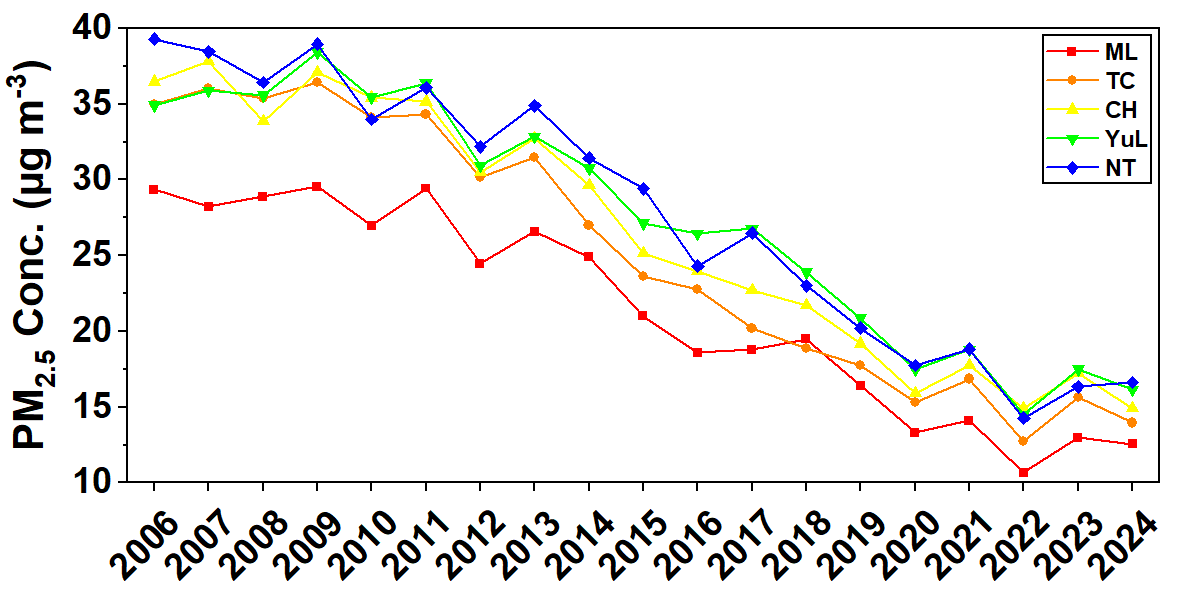

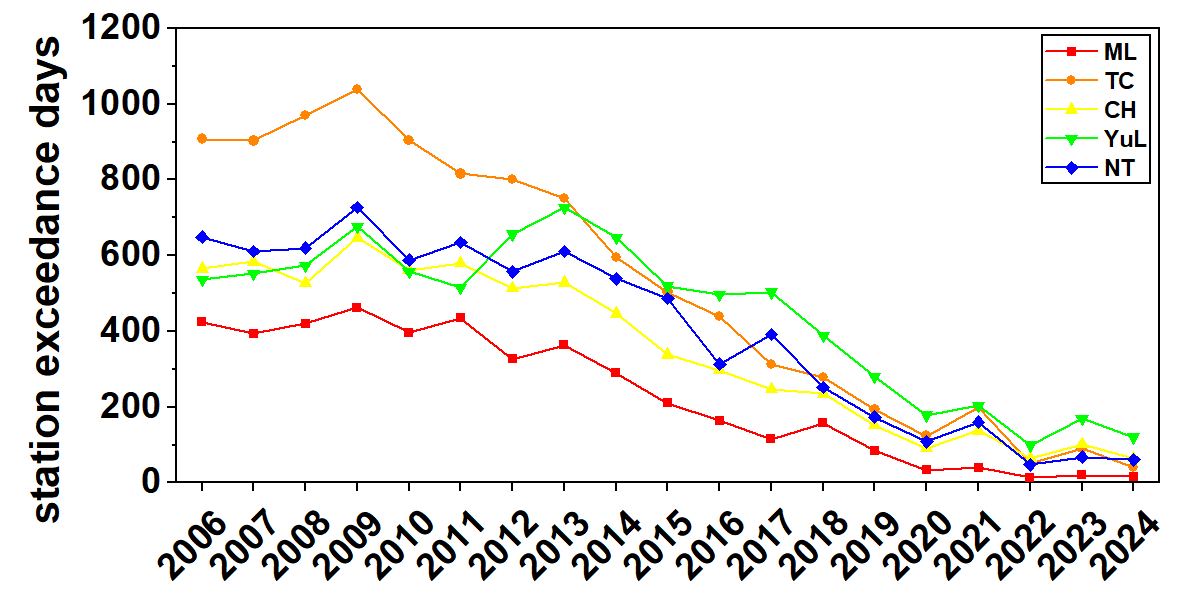


Fig. S1 The PM2.5 concentration (a) and the corresponding occurrence of station pollution (b) from 2006 to 2024 for Miaoli County (ML), Taichung City (TC), Changhua County (CH), Yunlin County (YuL), and Nantou County (NT).


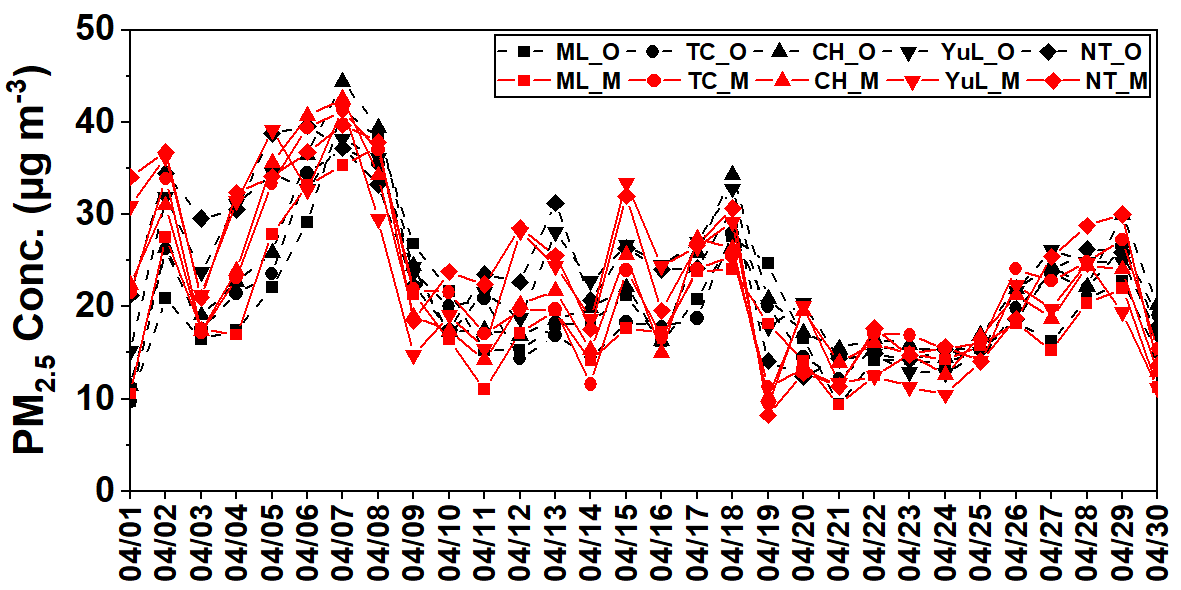


Fig. S2 The time series of modeled (M) and observed (O) PM2.5 concentration for Miaoli county (ML), Taichung City (TC), Changhua County (CH), Yunlin County (YuL), and Nantou County (NT) in central Taiwan from April 1 to April 30, 2019.


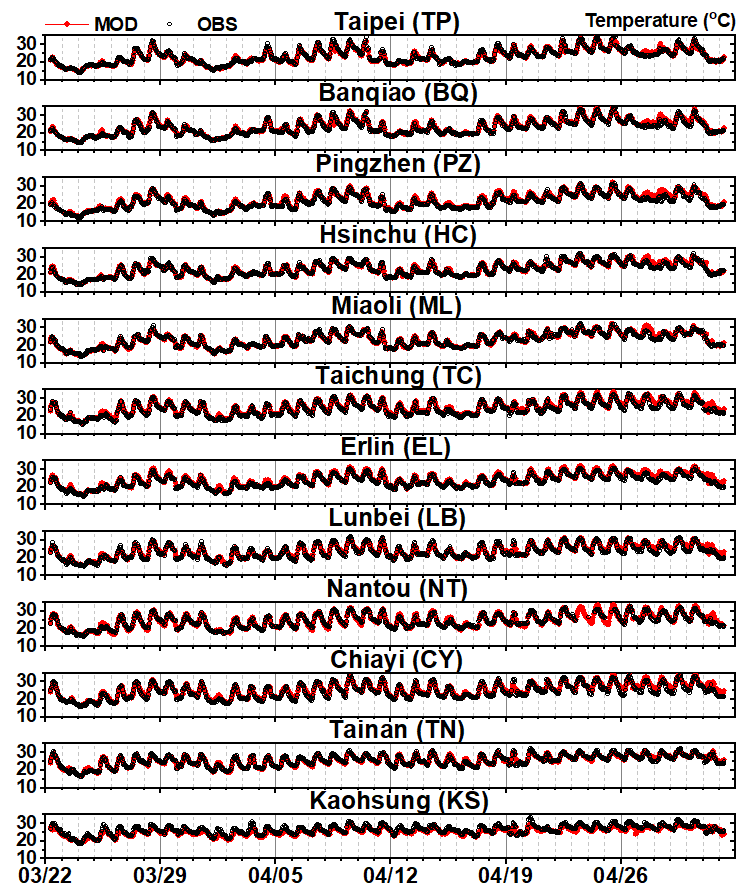

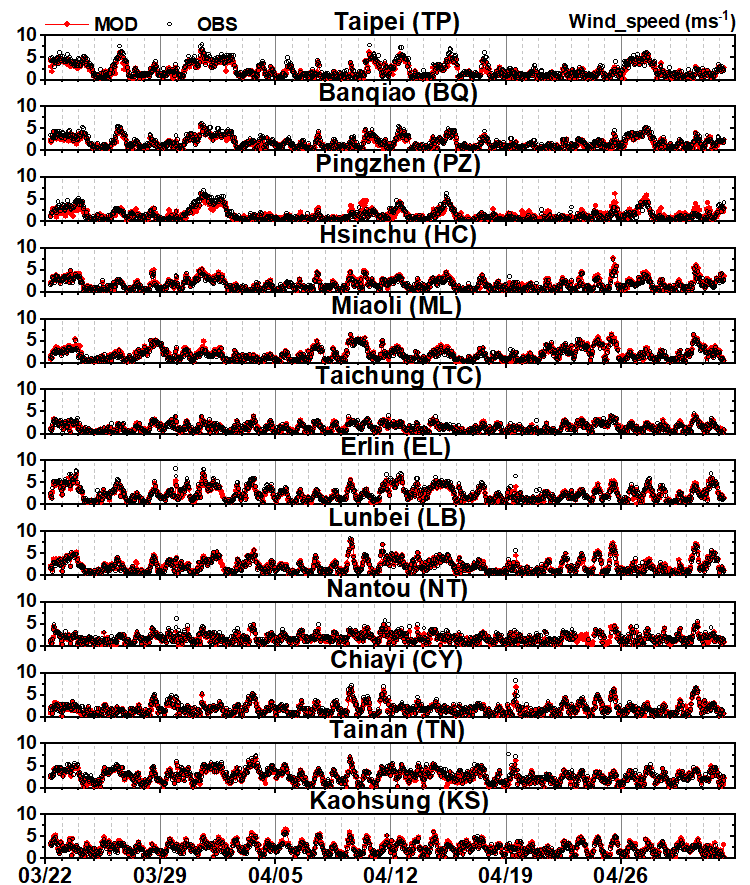


| Fig S3-1 The time series of modeled and observed temperatures at 12 representative sites in domain4. | Fig S3-2 The time series of modeled and observed wind speed at 12 representative sites in domain4. |
| --- | --- |


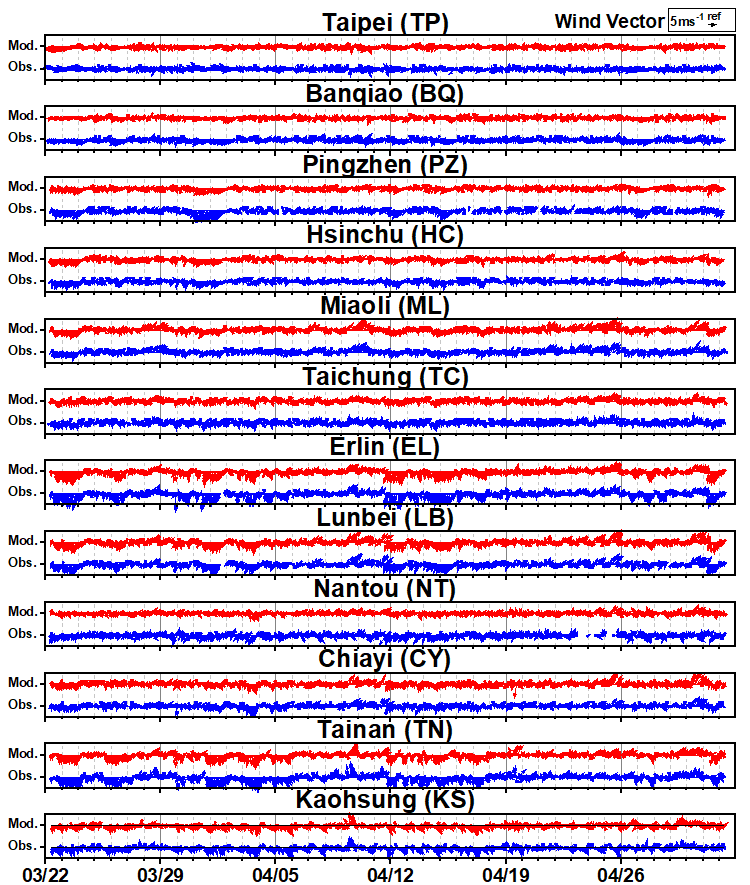

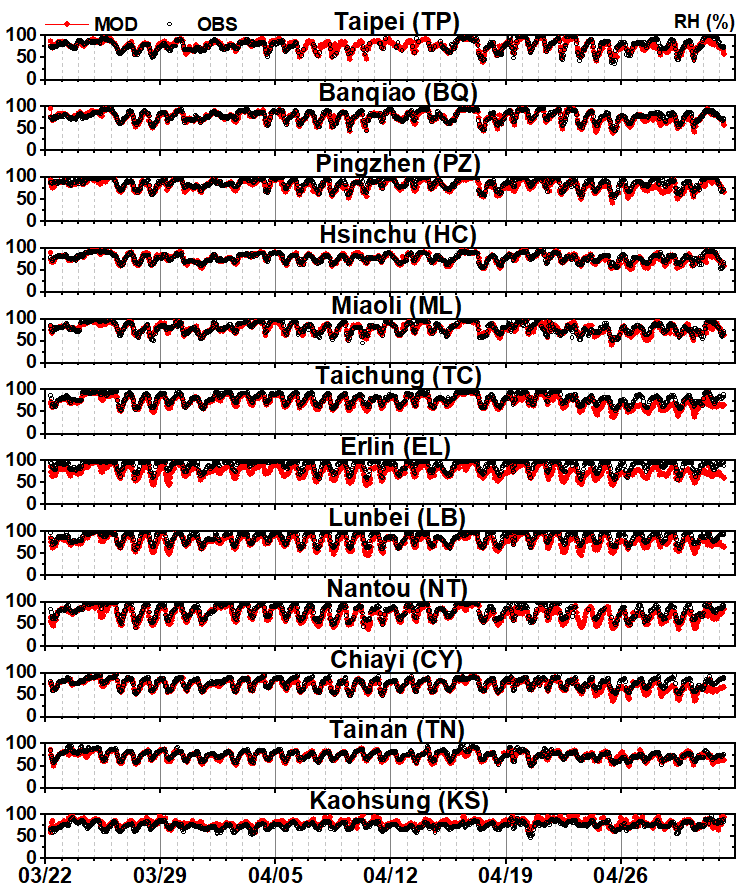


| Fig S3-3 The time series of modeled and observed wind direction at 12 representative sites in domain4. | Fig S3-4 The time series of modeled and observed relative humidity at 12 representative sites in domain4. |
| --- | --- |


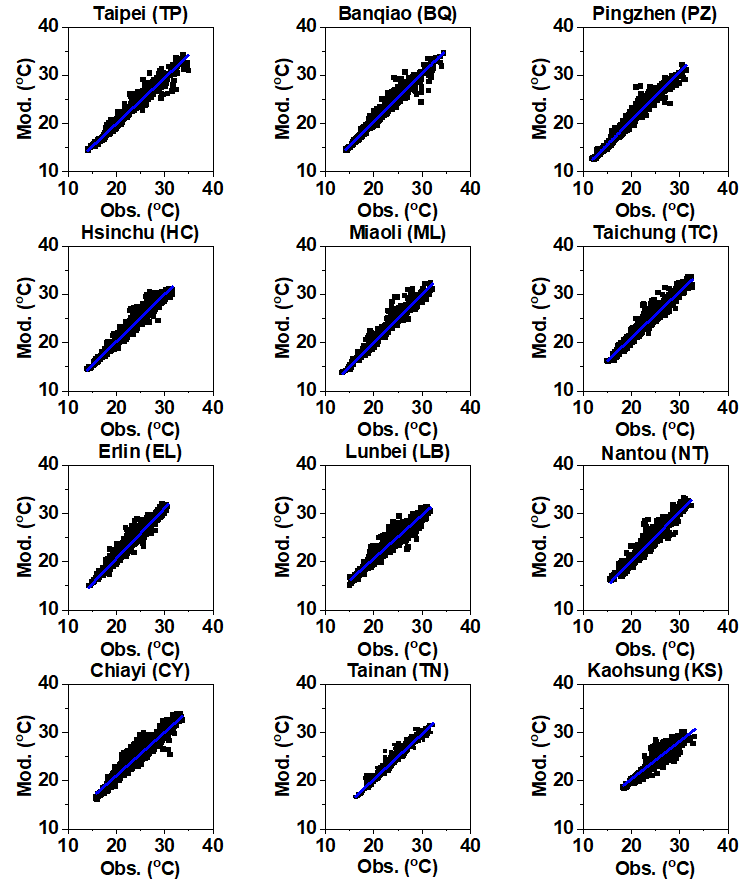

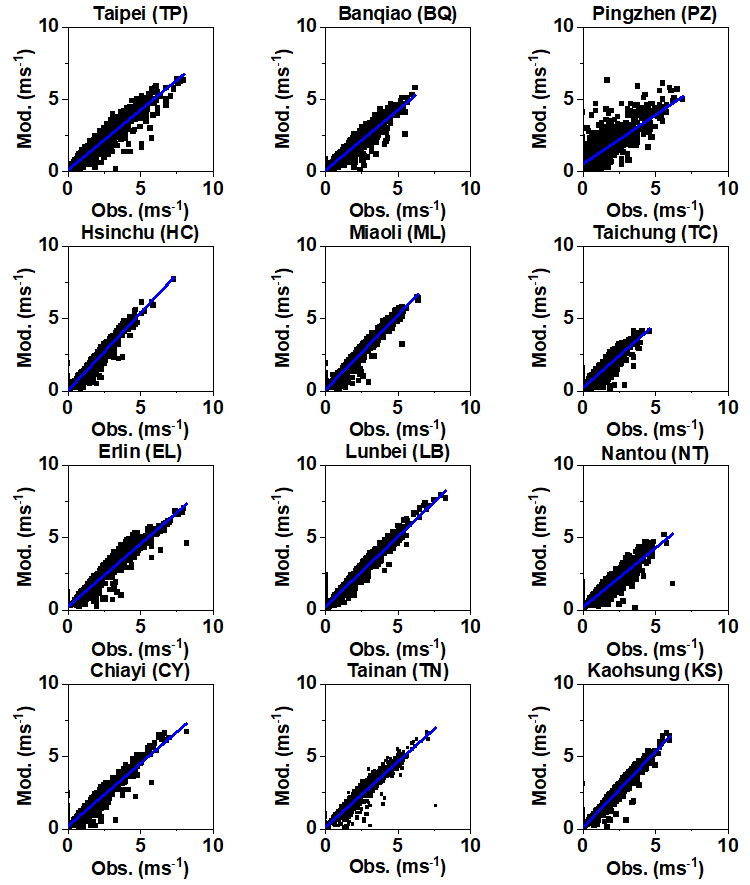


| Fig S4-1 The scatter of modeled (Y axis) and observed (X axis) temperatures at 12 representative sites in domain4. | Fig S4-2 The scatter of modeled (Y axis) and observed (X axis) wind speed at 12 representative sites in domain4. |
| --- | --- |


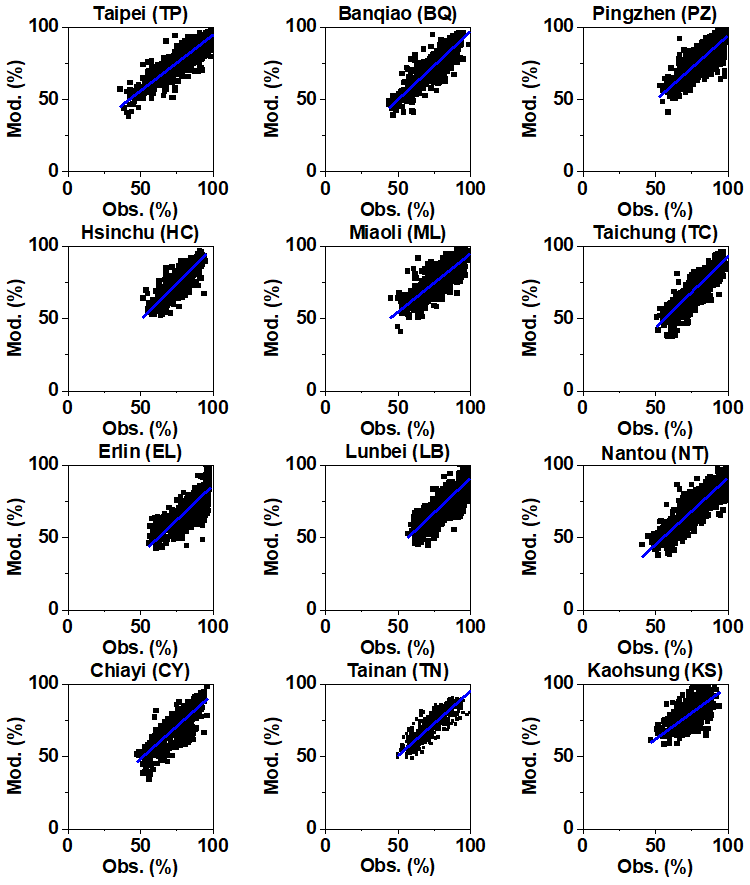


| Fig S4-3 The scatter of modeled (Y axis) and observed (X axis) RH at 12 representative sites in domain4. |  |
| --- | --- |


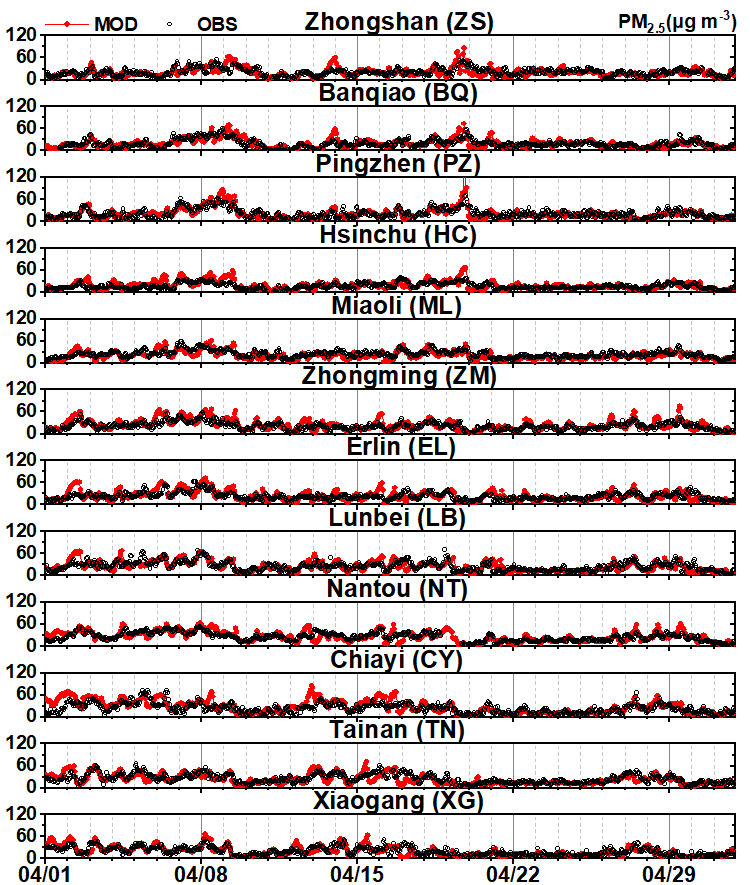

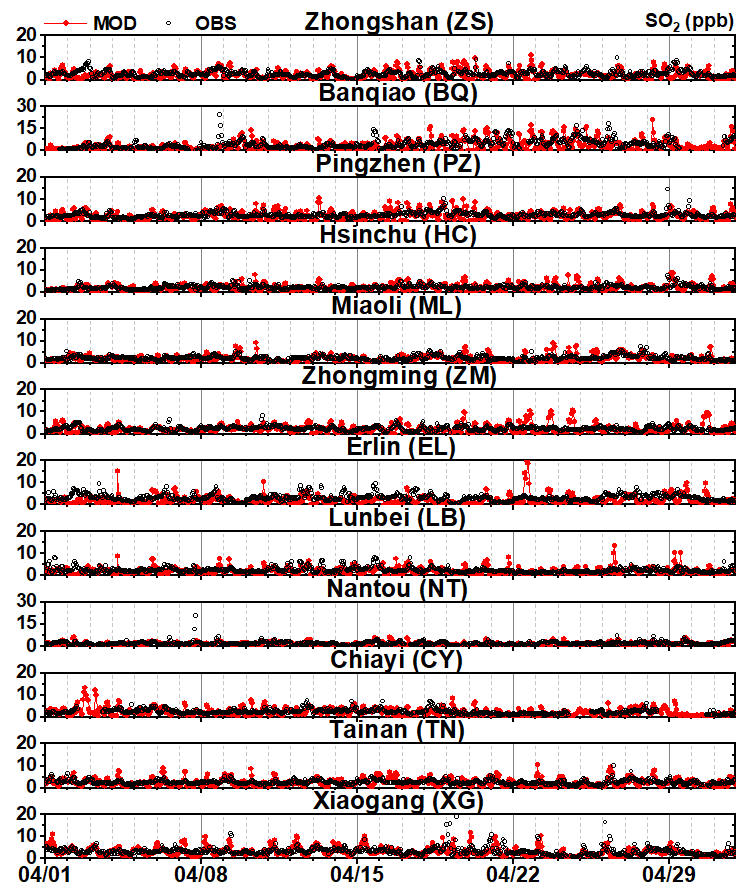


| Fig S5-1 The time series of modeled and observed PM2.5 at 12 representative sites in domain4. | Fig S5-2 The time series of modeled and observed SO2 at 12 representative sites in domain4. |
| --- | --- |


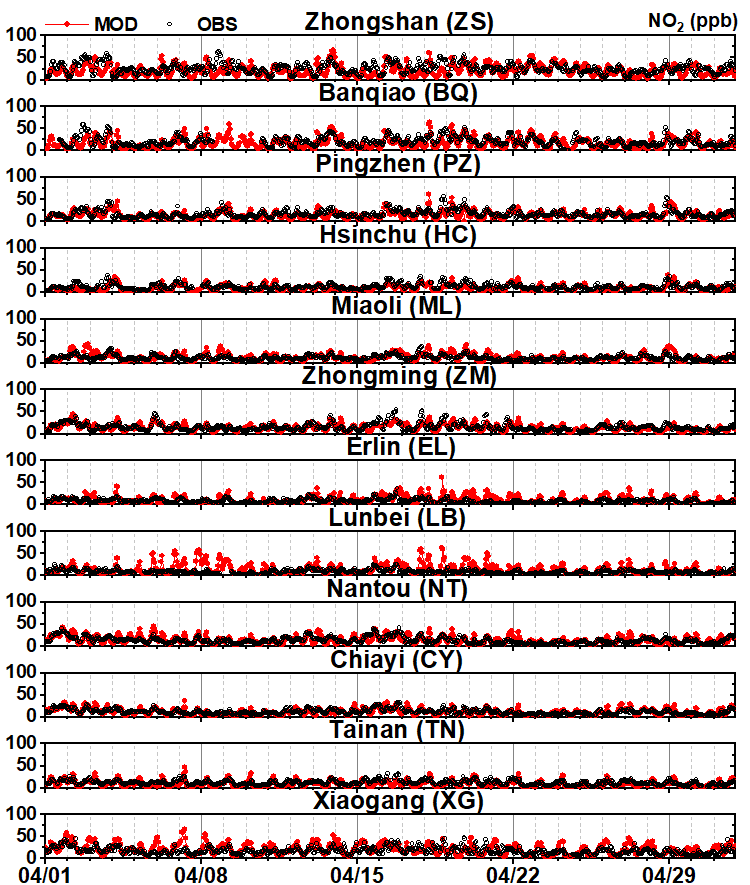

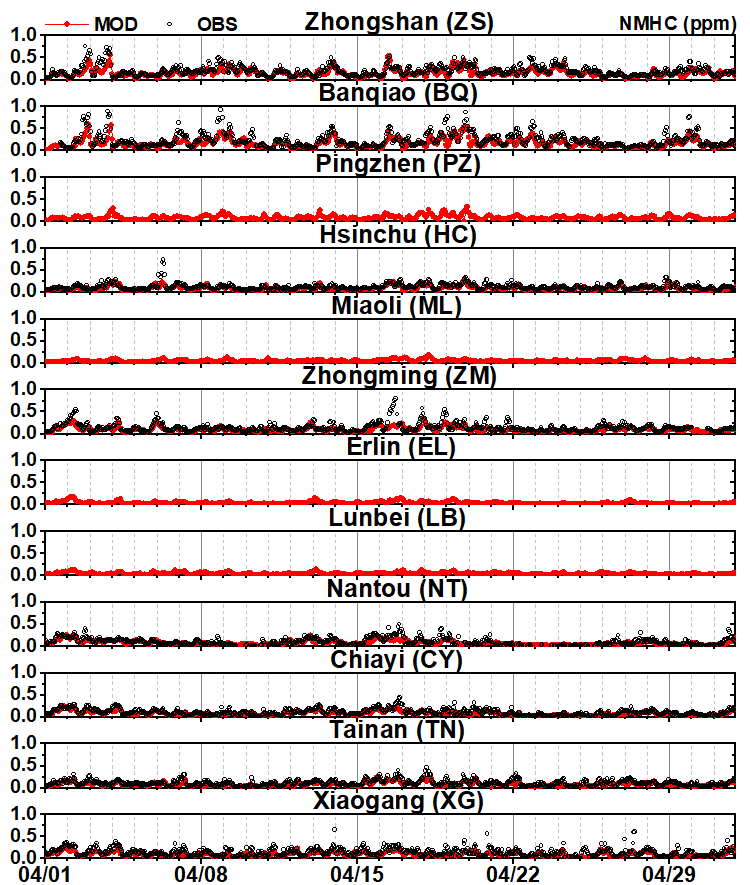


| Fig S5-3 The time series of modeled and observed NO2 at 12 representative sites in domain4. | Fig S5-4 The time series of modeled and observed NMHC at 12 representative sites in domain4. |
| --- | --- |


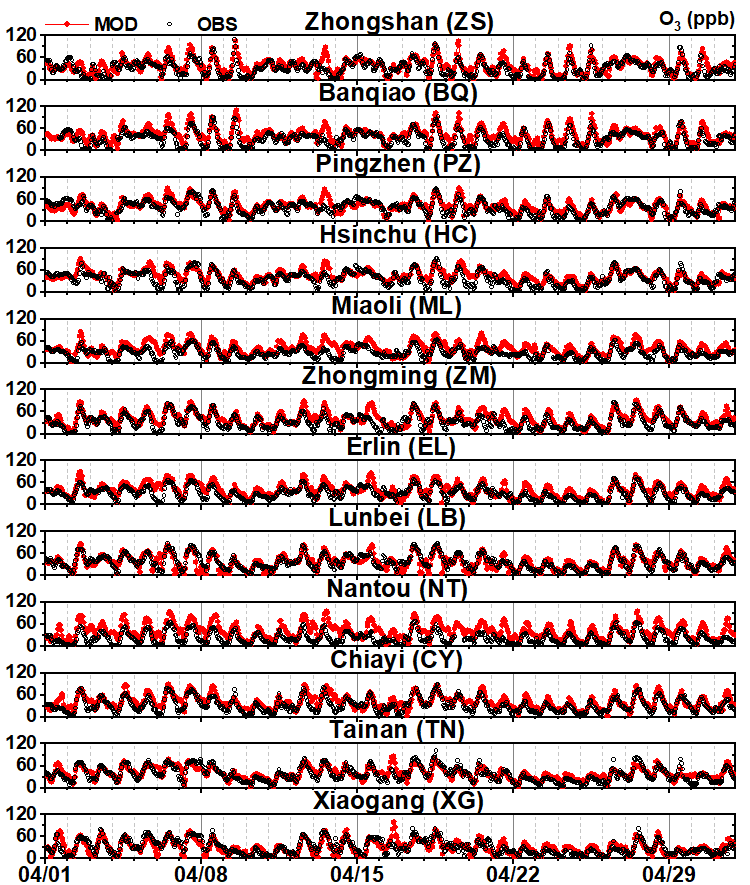

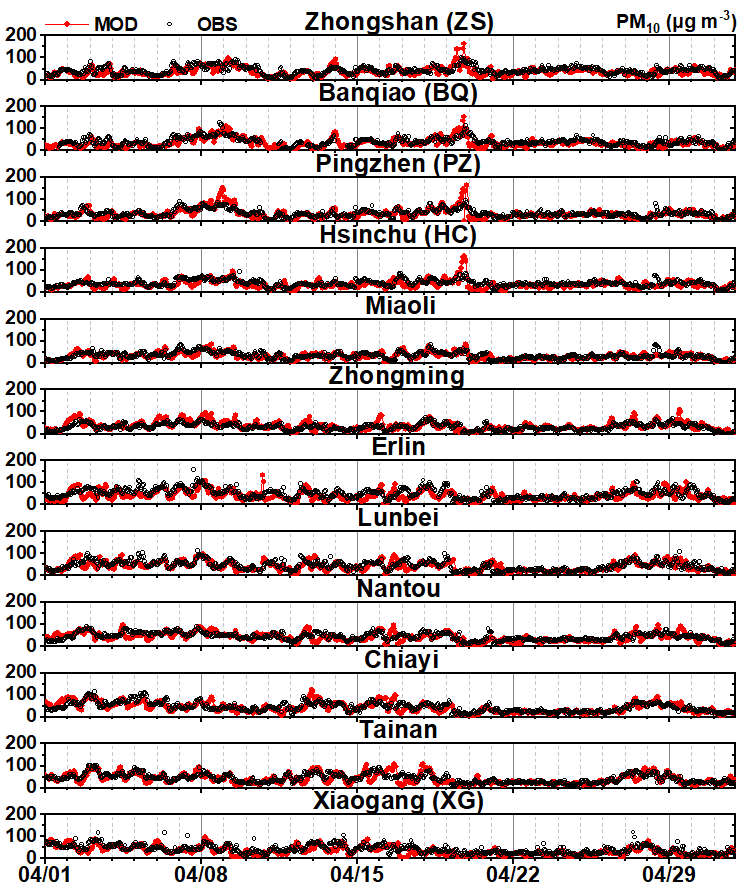


| Fig S5-5 The time series of modeled and observed O3 at 12 representative sites in domain4. | Fig S5-6 The time series of modeled and observed PM10 at 12 representative sites in domain4. |
| --- | --- |


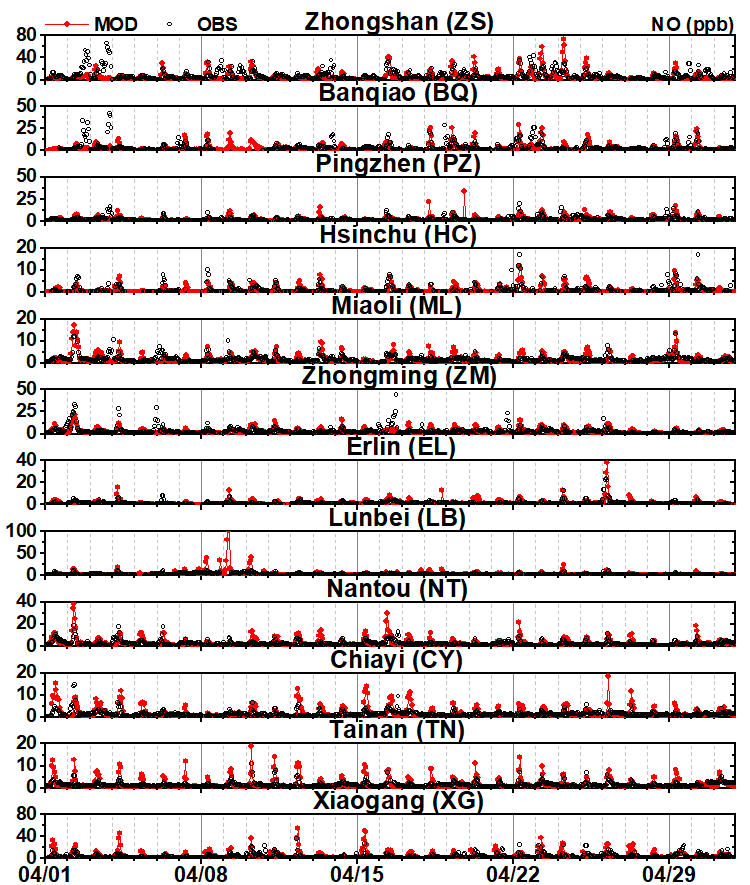

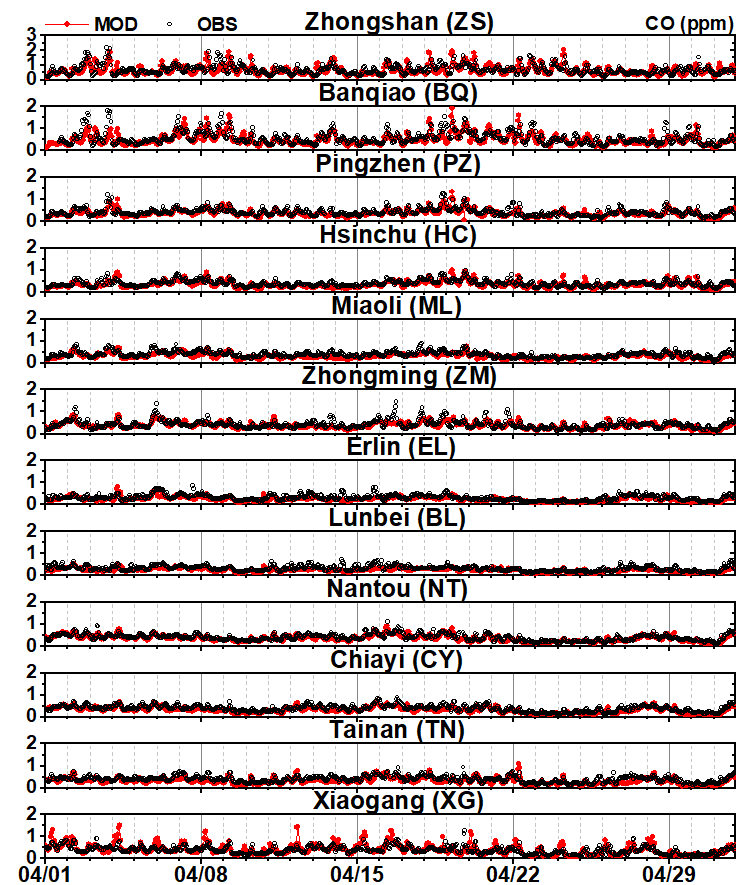


| Fig S5-7 The time series of modeled and observed NO at 12 representative sites in domain4. | Fig S5-8 The time series of modeled and observed CO at 12 representative sites in domain4. |
| --- | --- |


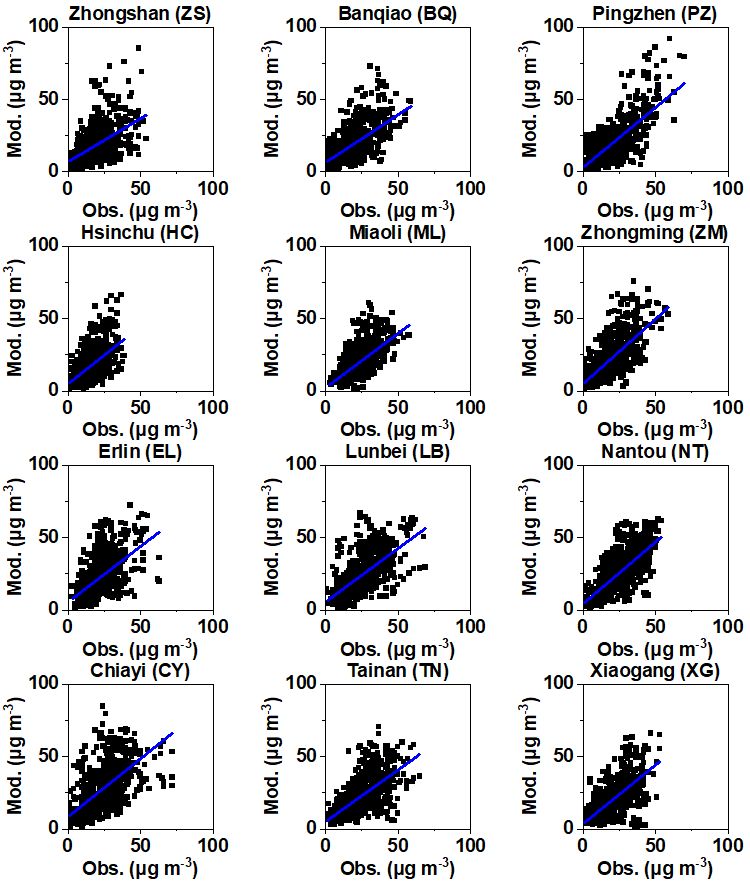

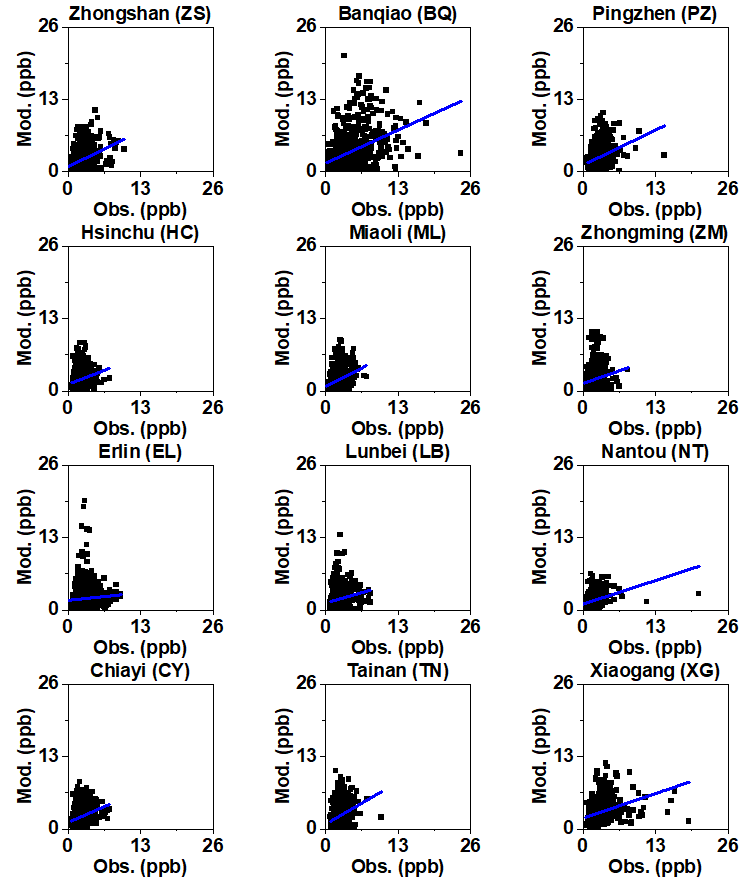


| Fig S6-1 The scatter of modeled (Y axis) and observed (X axis) PM2.5 at 12 representative sites in domain4. | Fig S6-2 The scatter of modeled (Y axis) and observed (X axis) SO2 at 12 representative sites in domain4. |
| --- | --- |


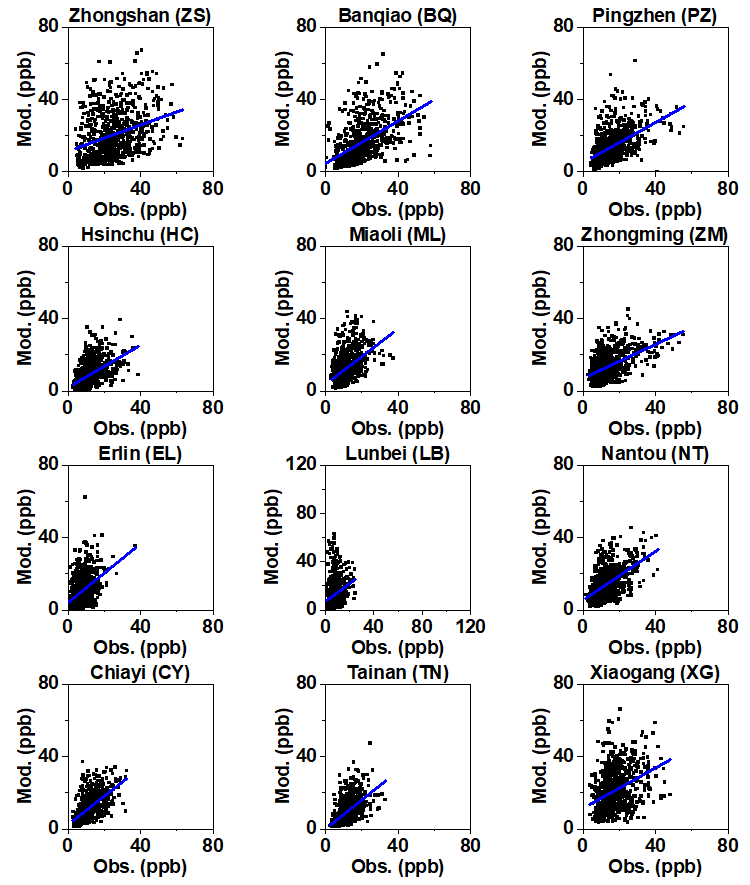

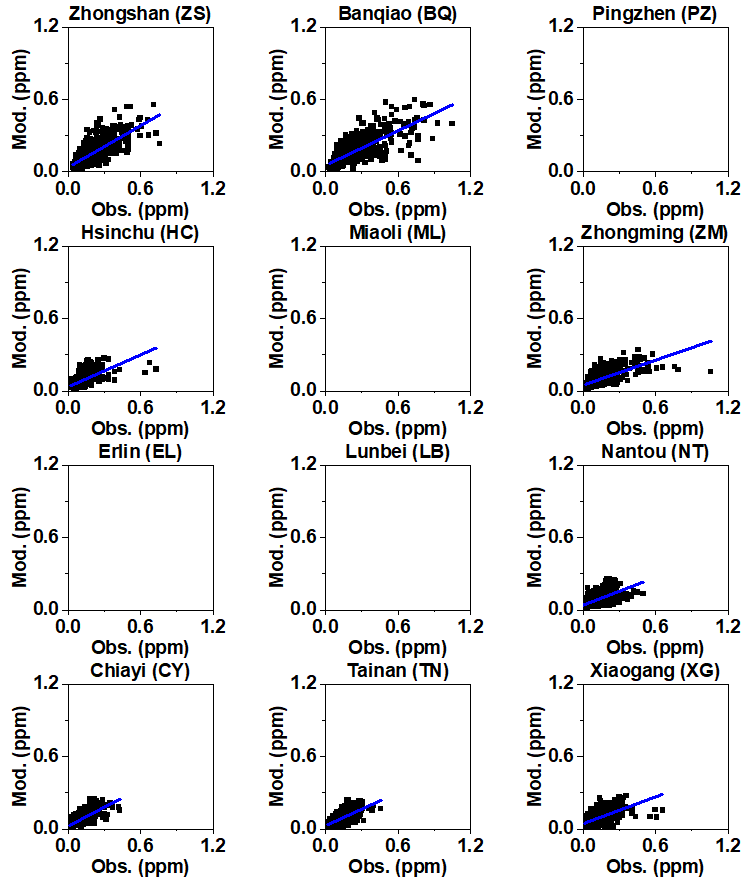


| Fig S6-3 The scatter of modeled (Y axis) and observed (X axis) NO2 at 12 representative sites in domain4. | Fig S6-4 The scatter of modeled (Y axis) and observed (X axis) NMHC at 12 representative sites in domain4. |
| --- | --- |


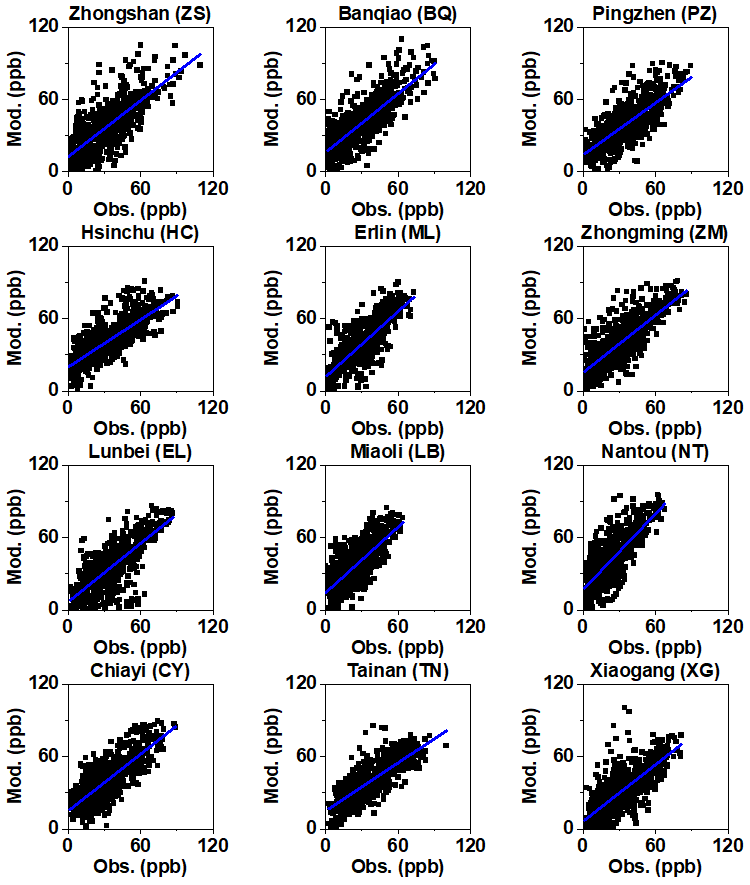

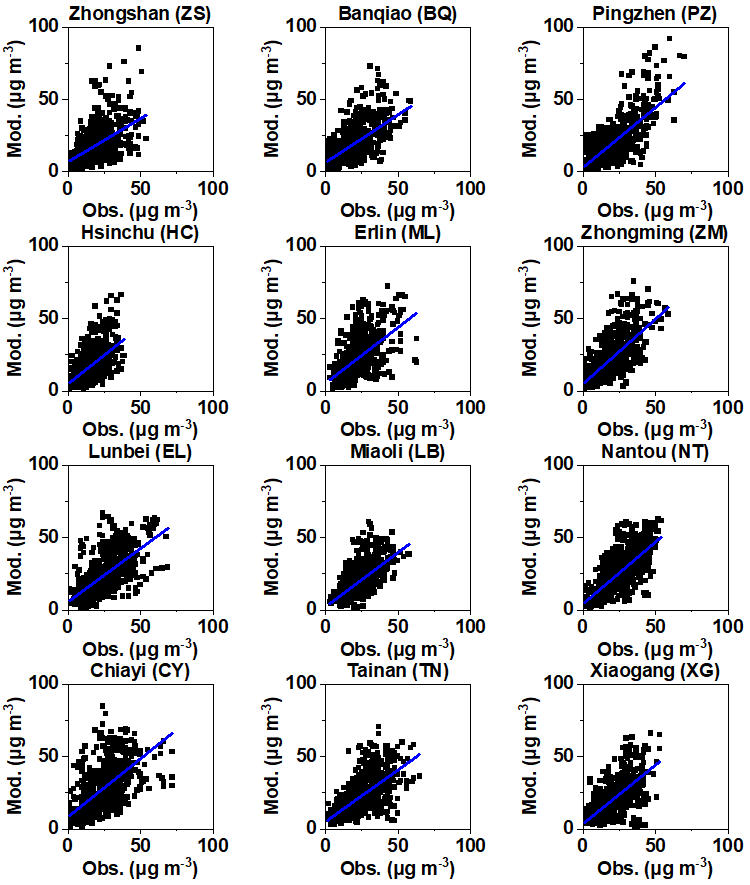


| Fig S6-5 The scatter of modeled (Y axis) and observed (X axis) O3 at 12 representative sites in domain4. | Fig S6-6 The scatter of modeled (Y axis) and observed (X axis) PM10 at 12 representative sites in domain4. |
| --- | --- |


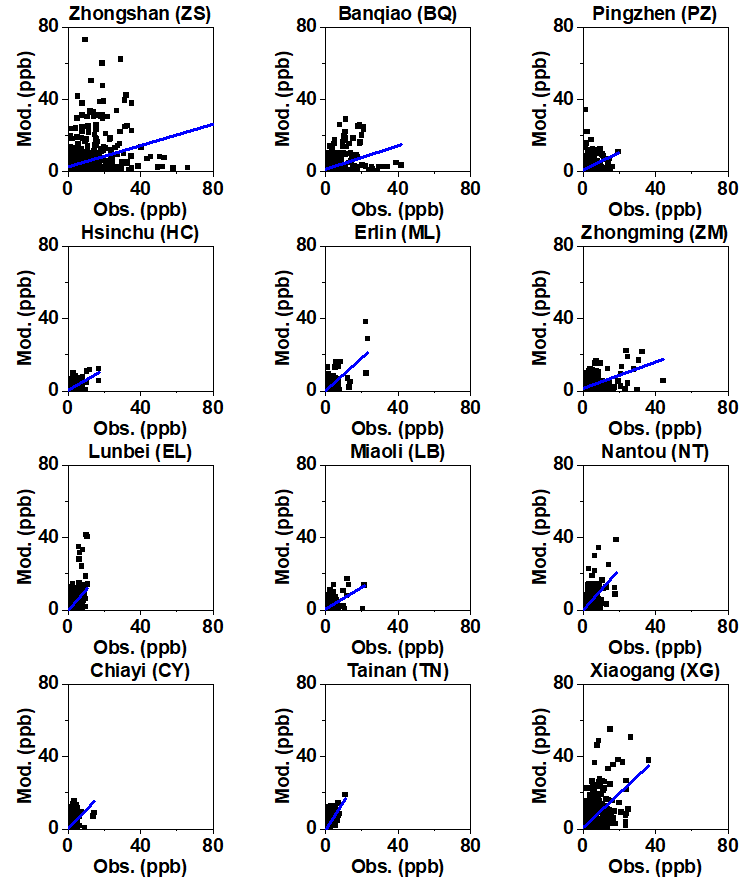

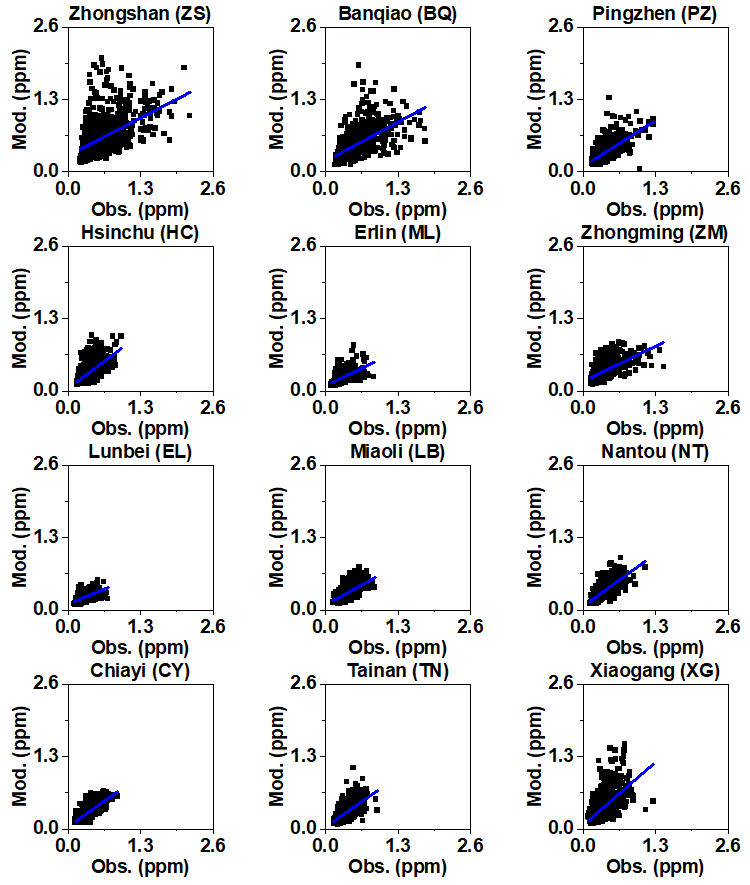


| Fig S6-7 The scatter of modeled (Y axis) and observed (X axis) NO at 12 representative sites in domain4. | Fig S6-8 The scatter of modeled (Y axis) and observed (X axis) CO at 12 representative sites in domain4. |
| --- | --- |


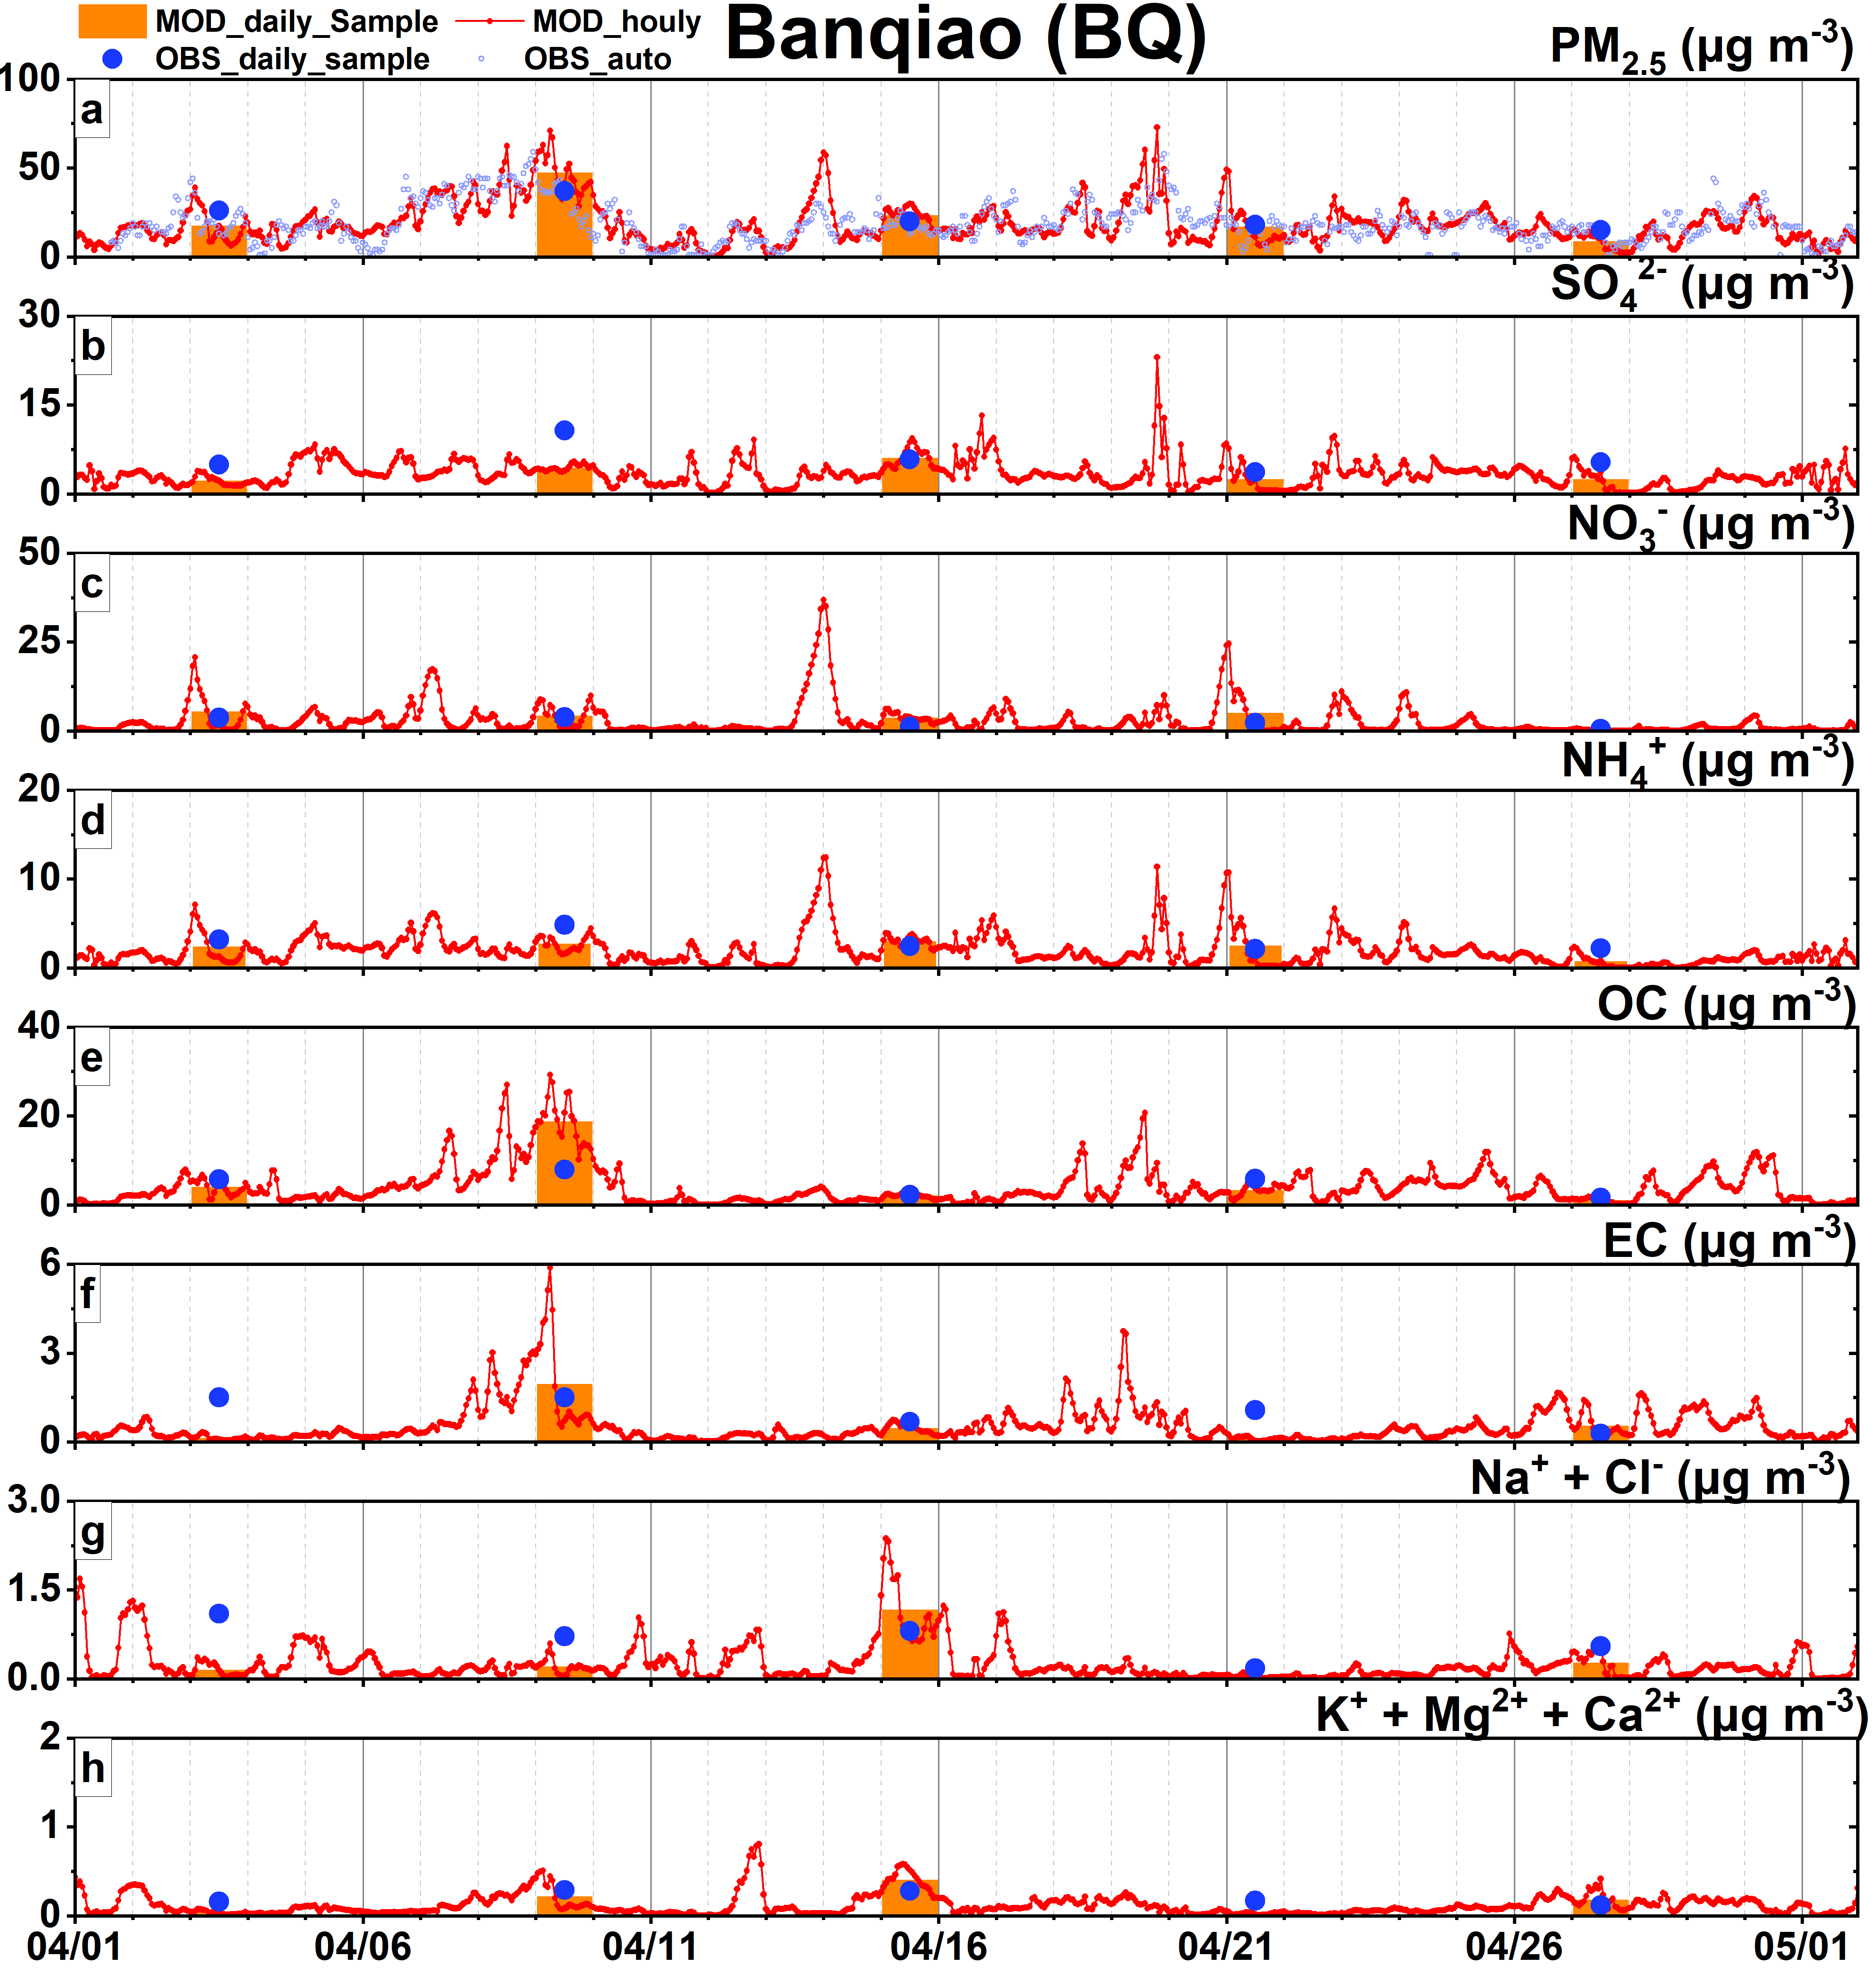


Fig S7-1 The time series of modeled and observed PM2.5 and PM2.5 species at Banqiao (BQ) station in domain4.


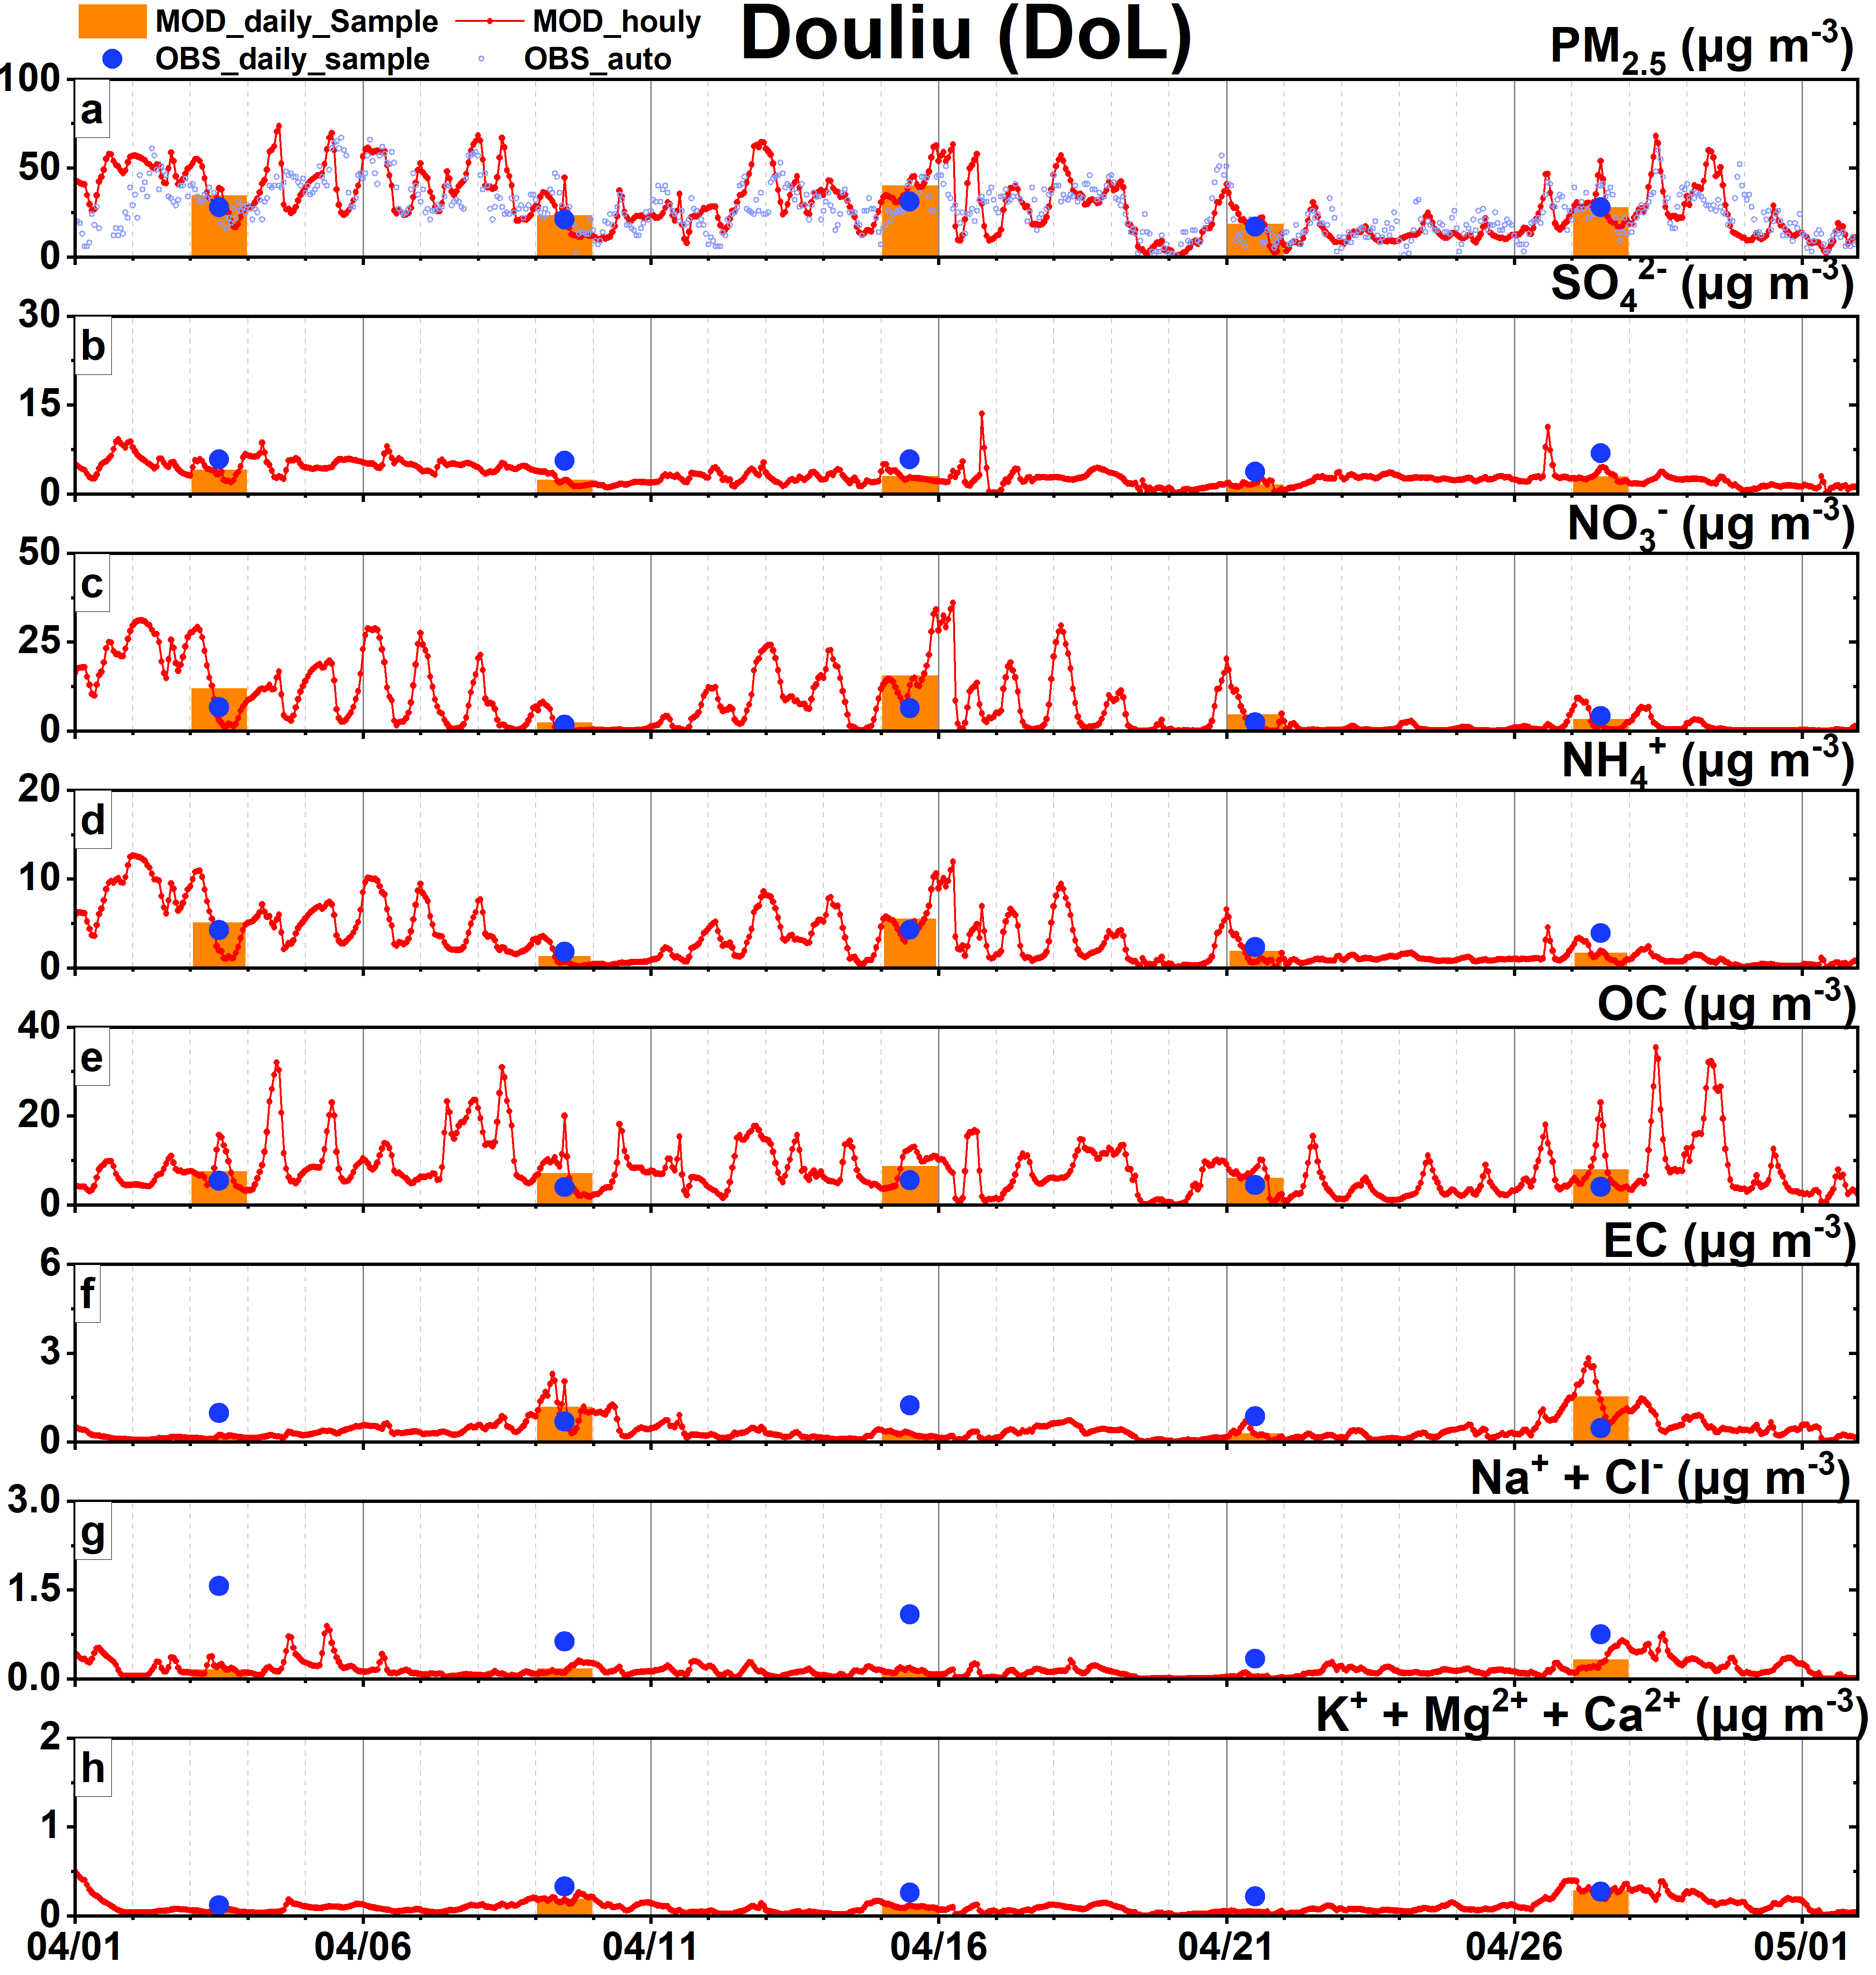


Fig S7-3 The time series of modeled and observed PM2.5 and PM2.5 species at Douliu (DL) station in domain4.
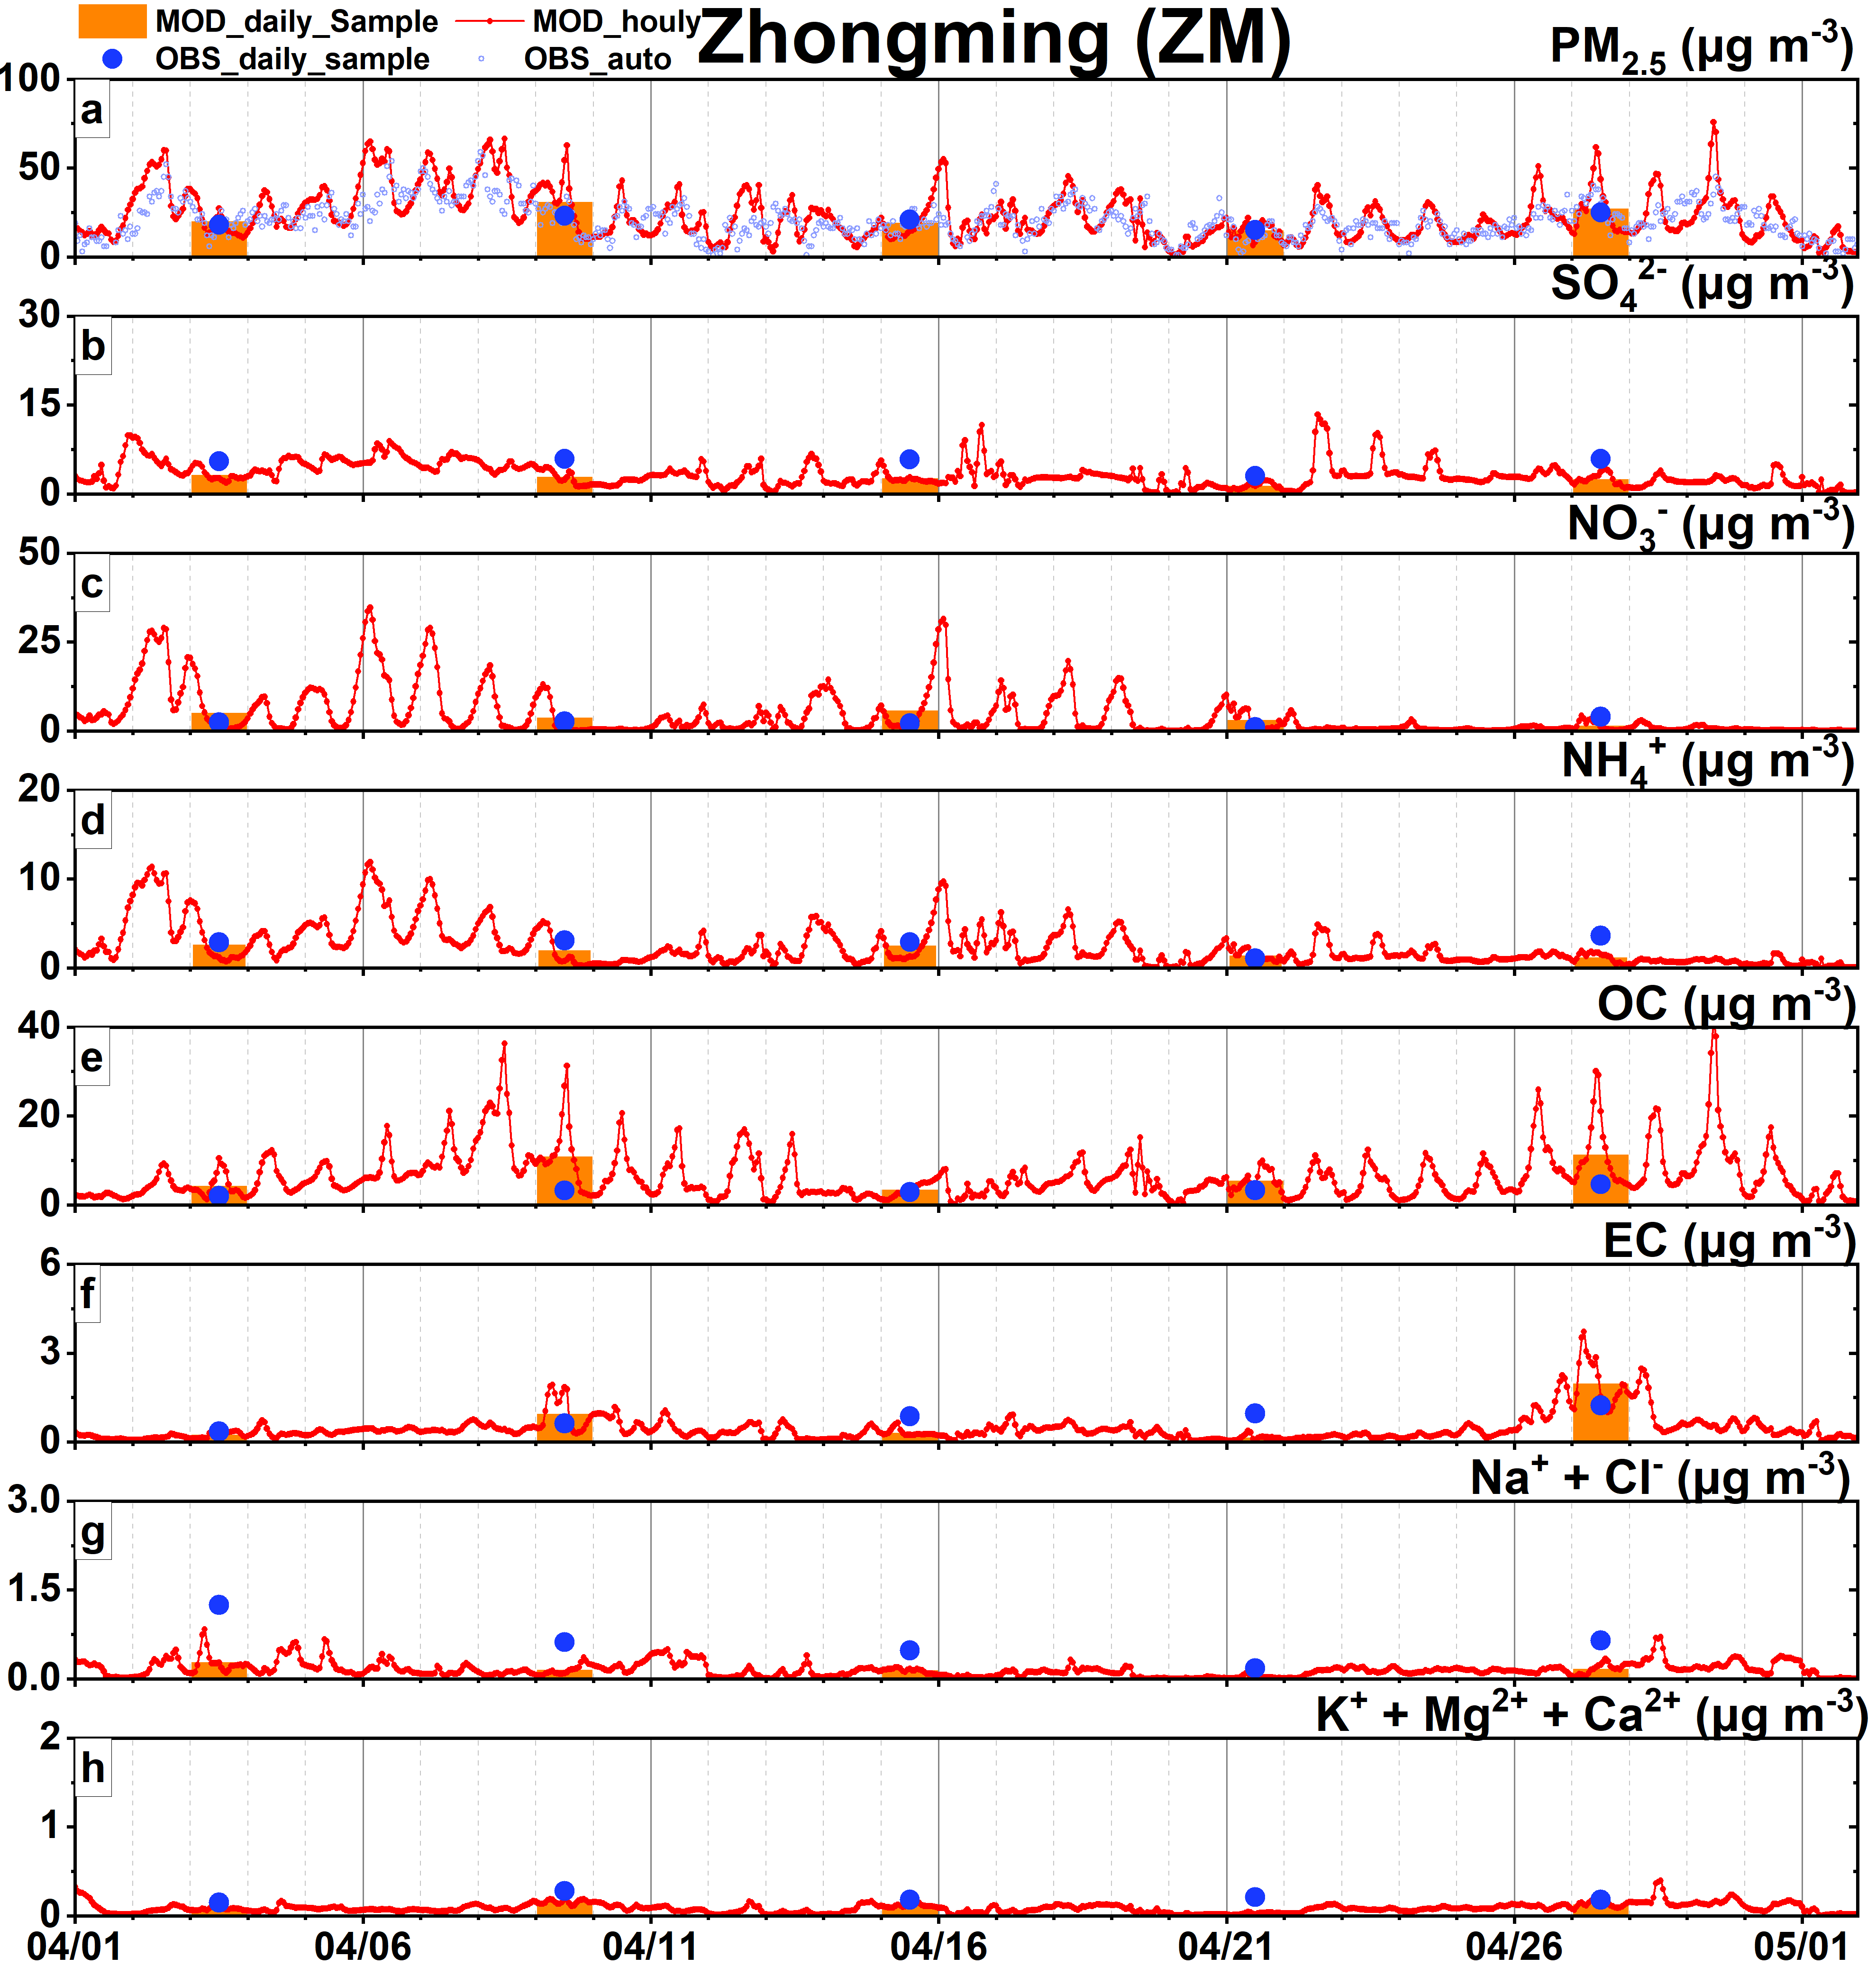


Fig S7-2 The time series of modeled and observed PM2.5 and PM2.5 species at Zhongming (ZM) station in domain4.


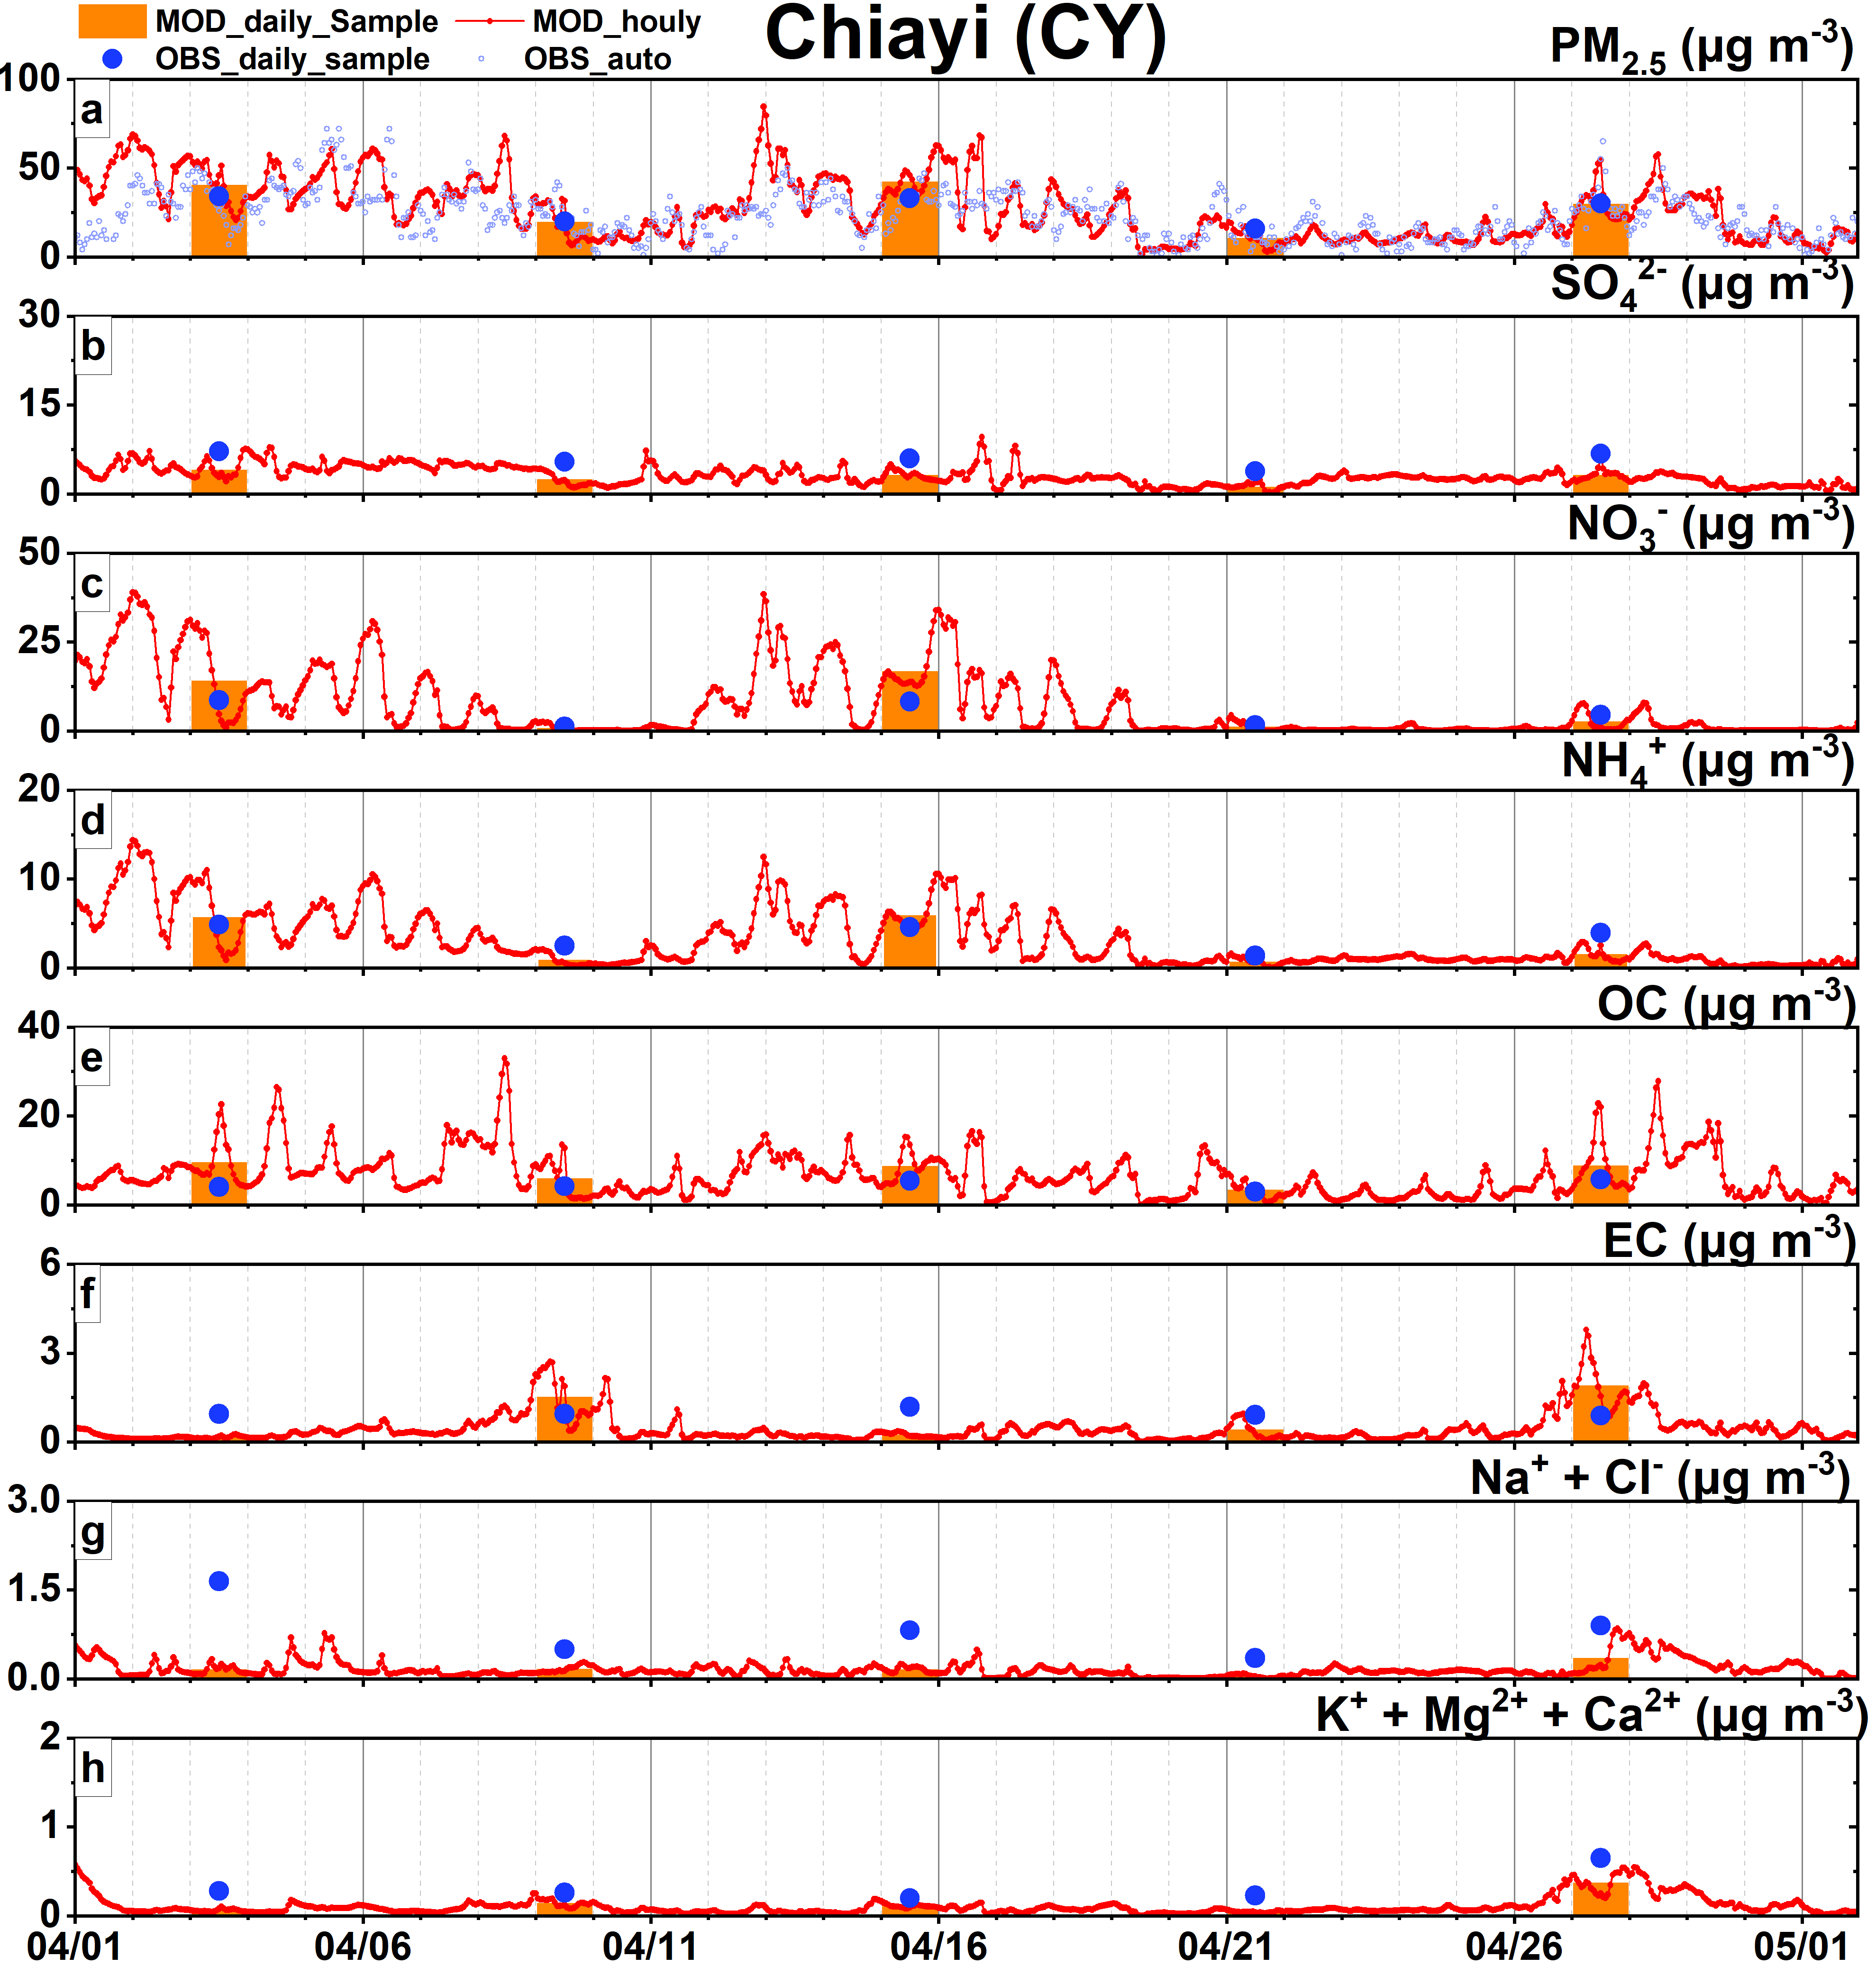


Fig S7-4 The time series of modeled and observed PM2.5 and PM2.5 species at Chiayi (CY) station in domain4.


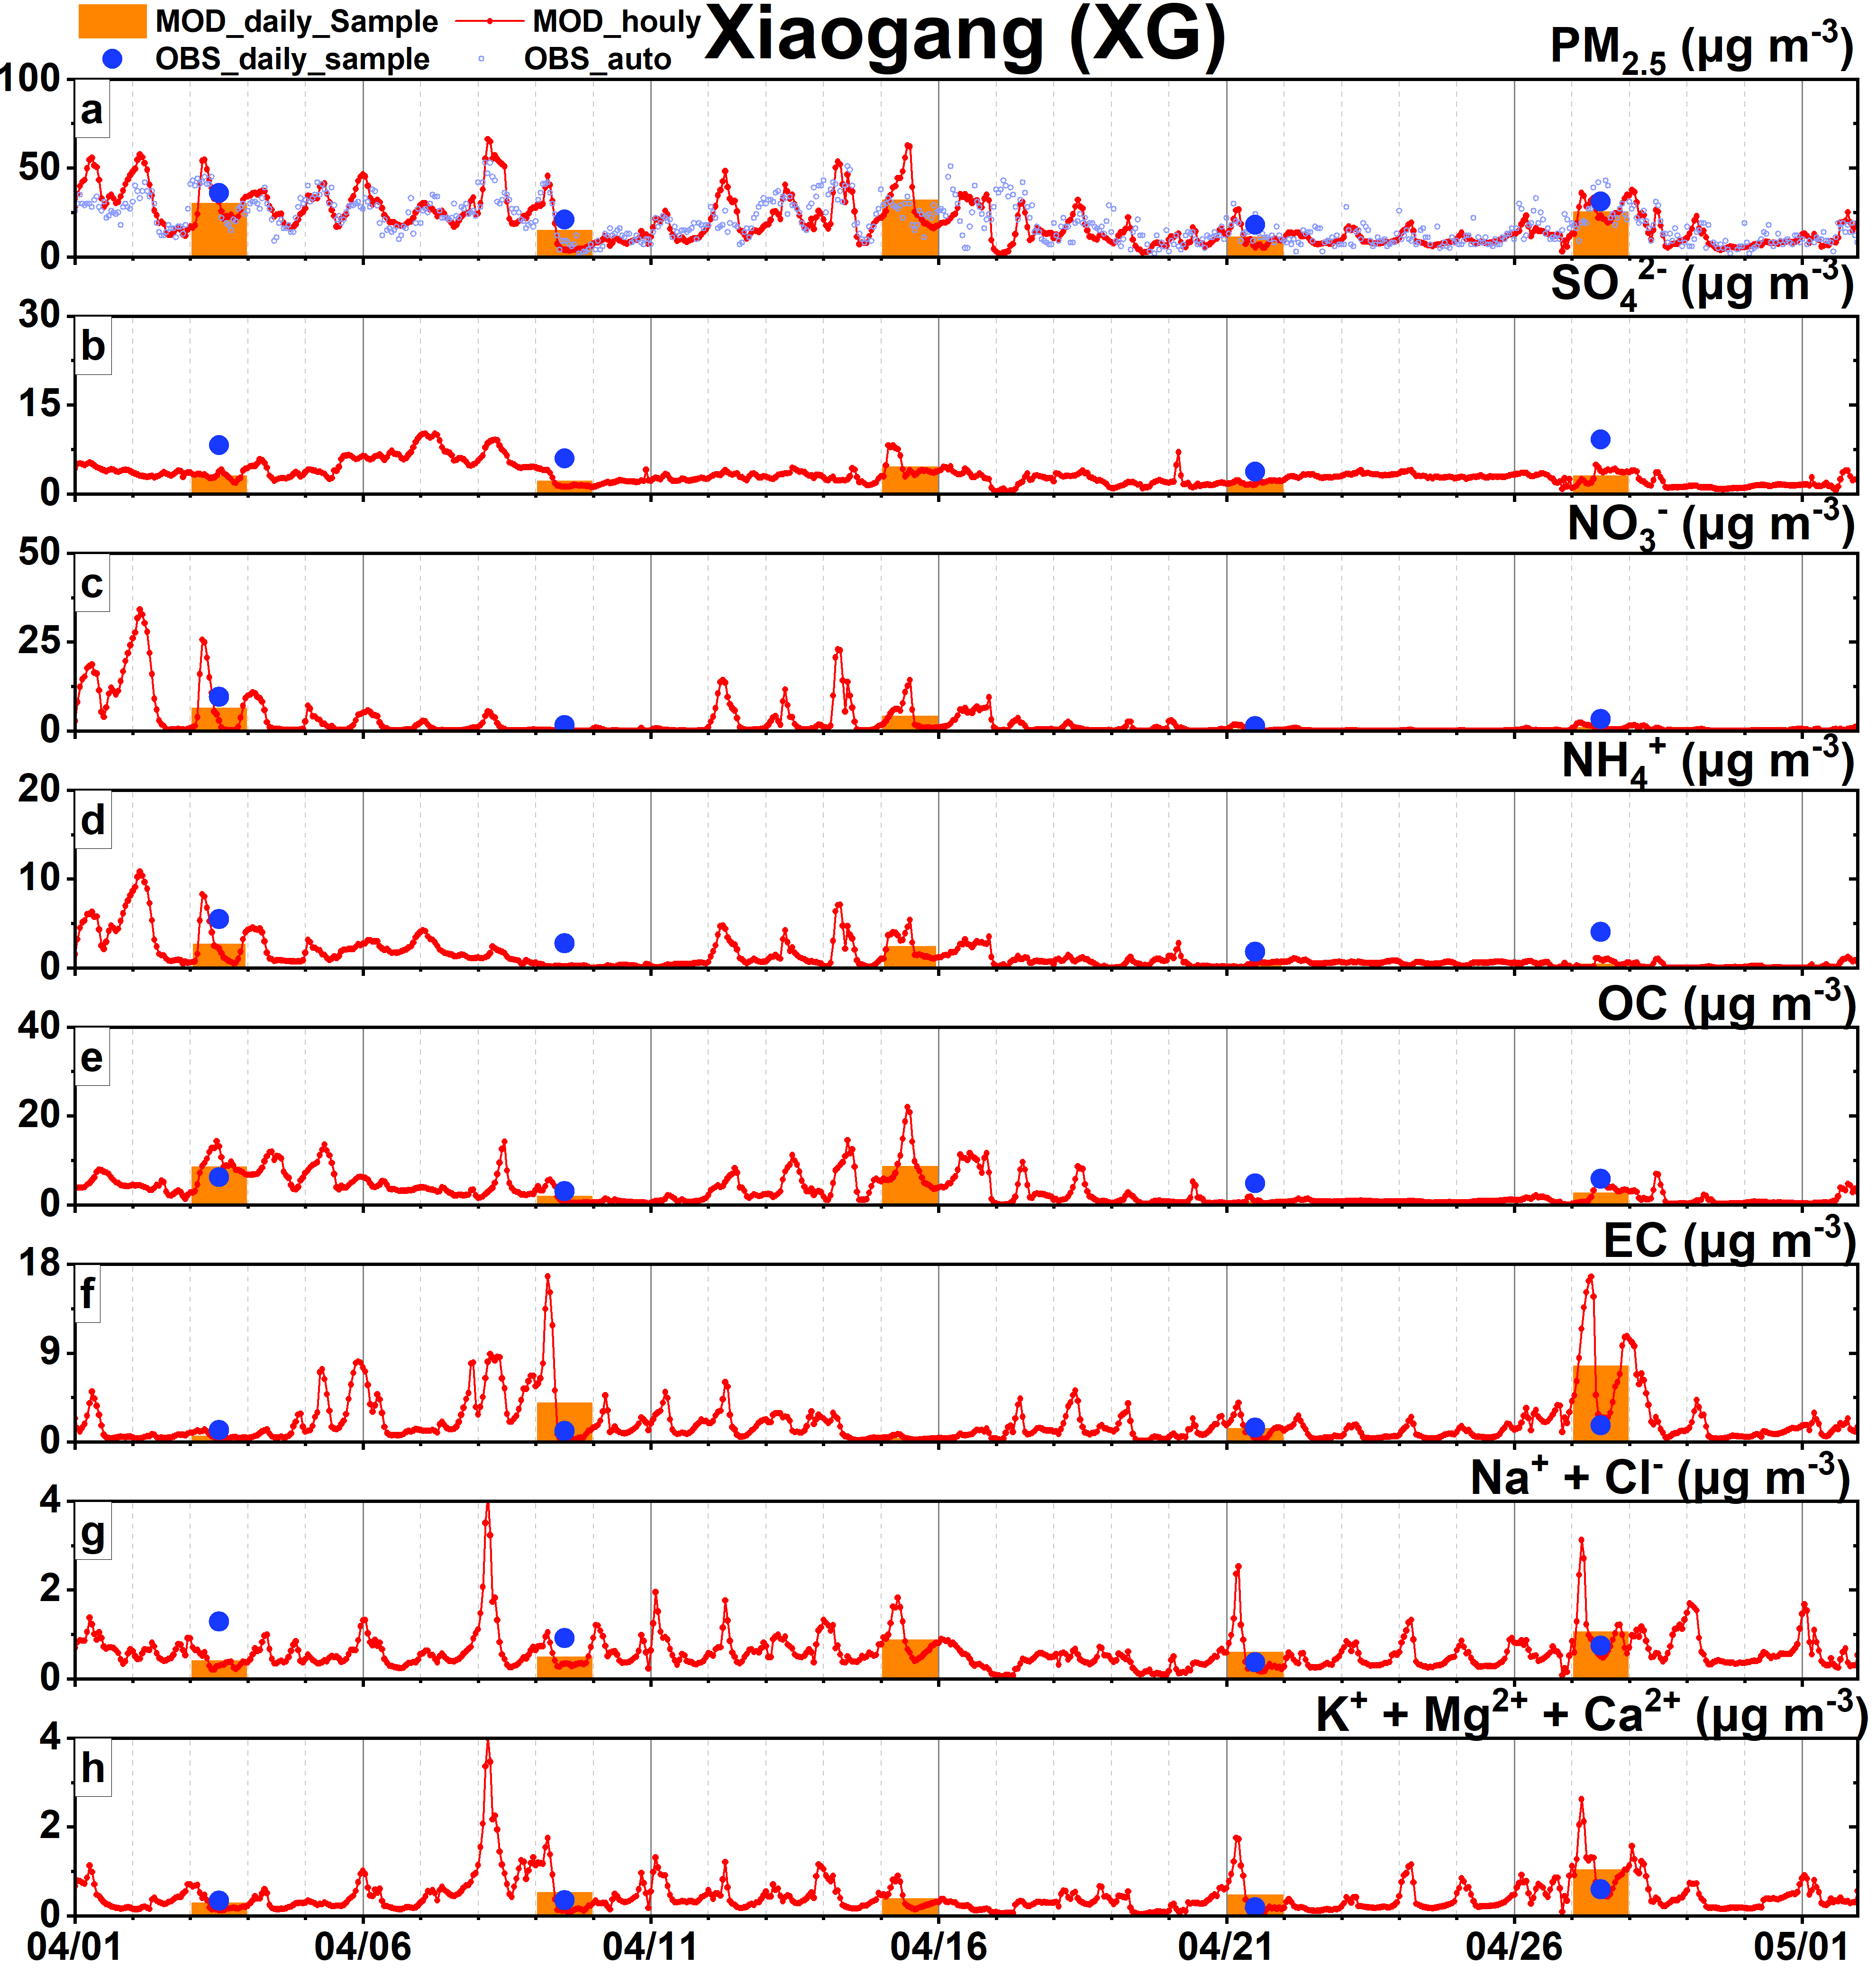


Fig S7-5 The time series of modeled and observed PM2.5 and PM2.5 species at Xiaogang (XG) station in domain4.


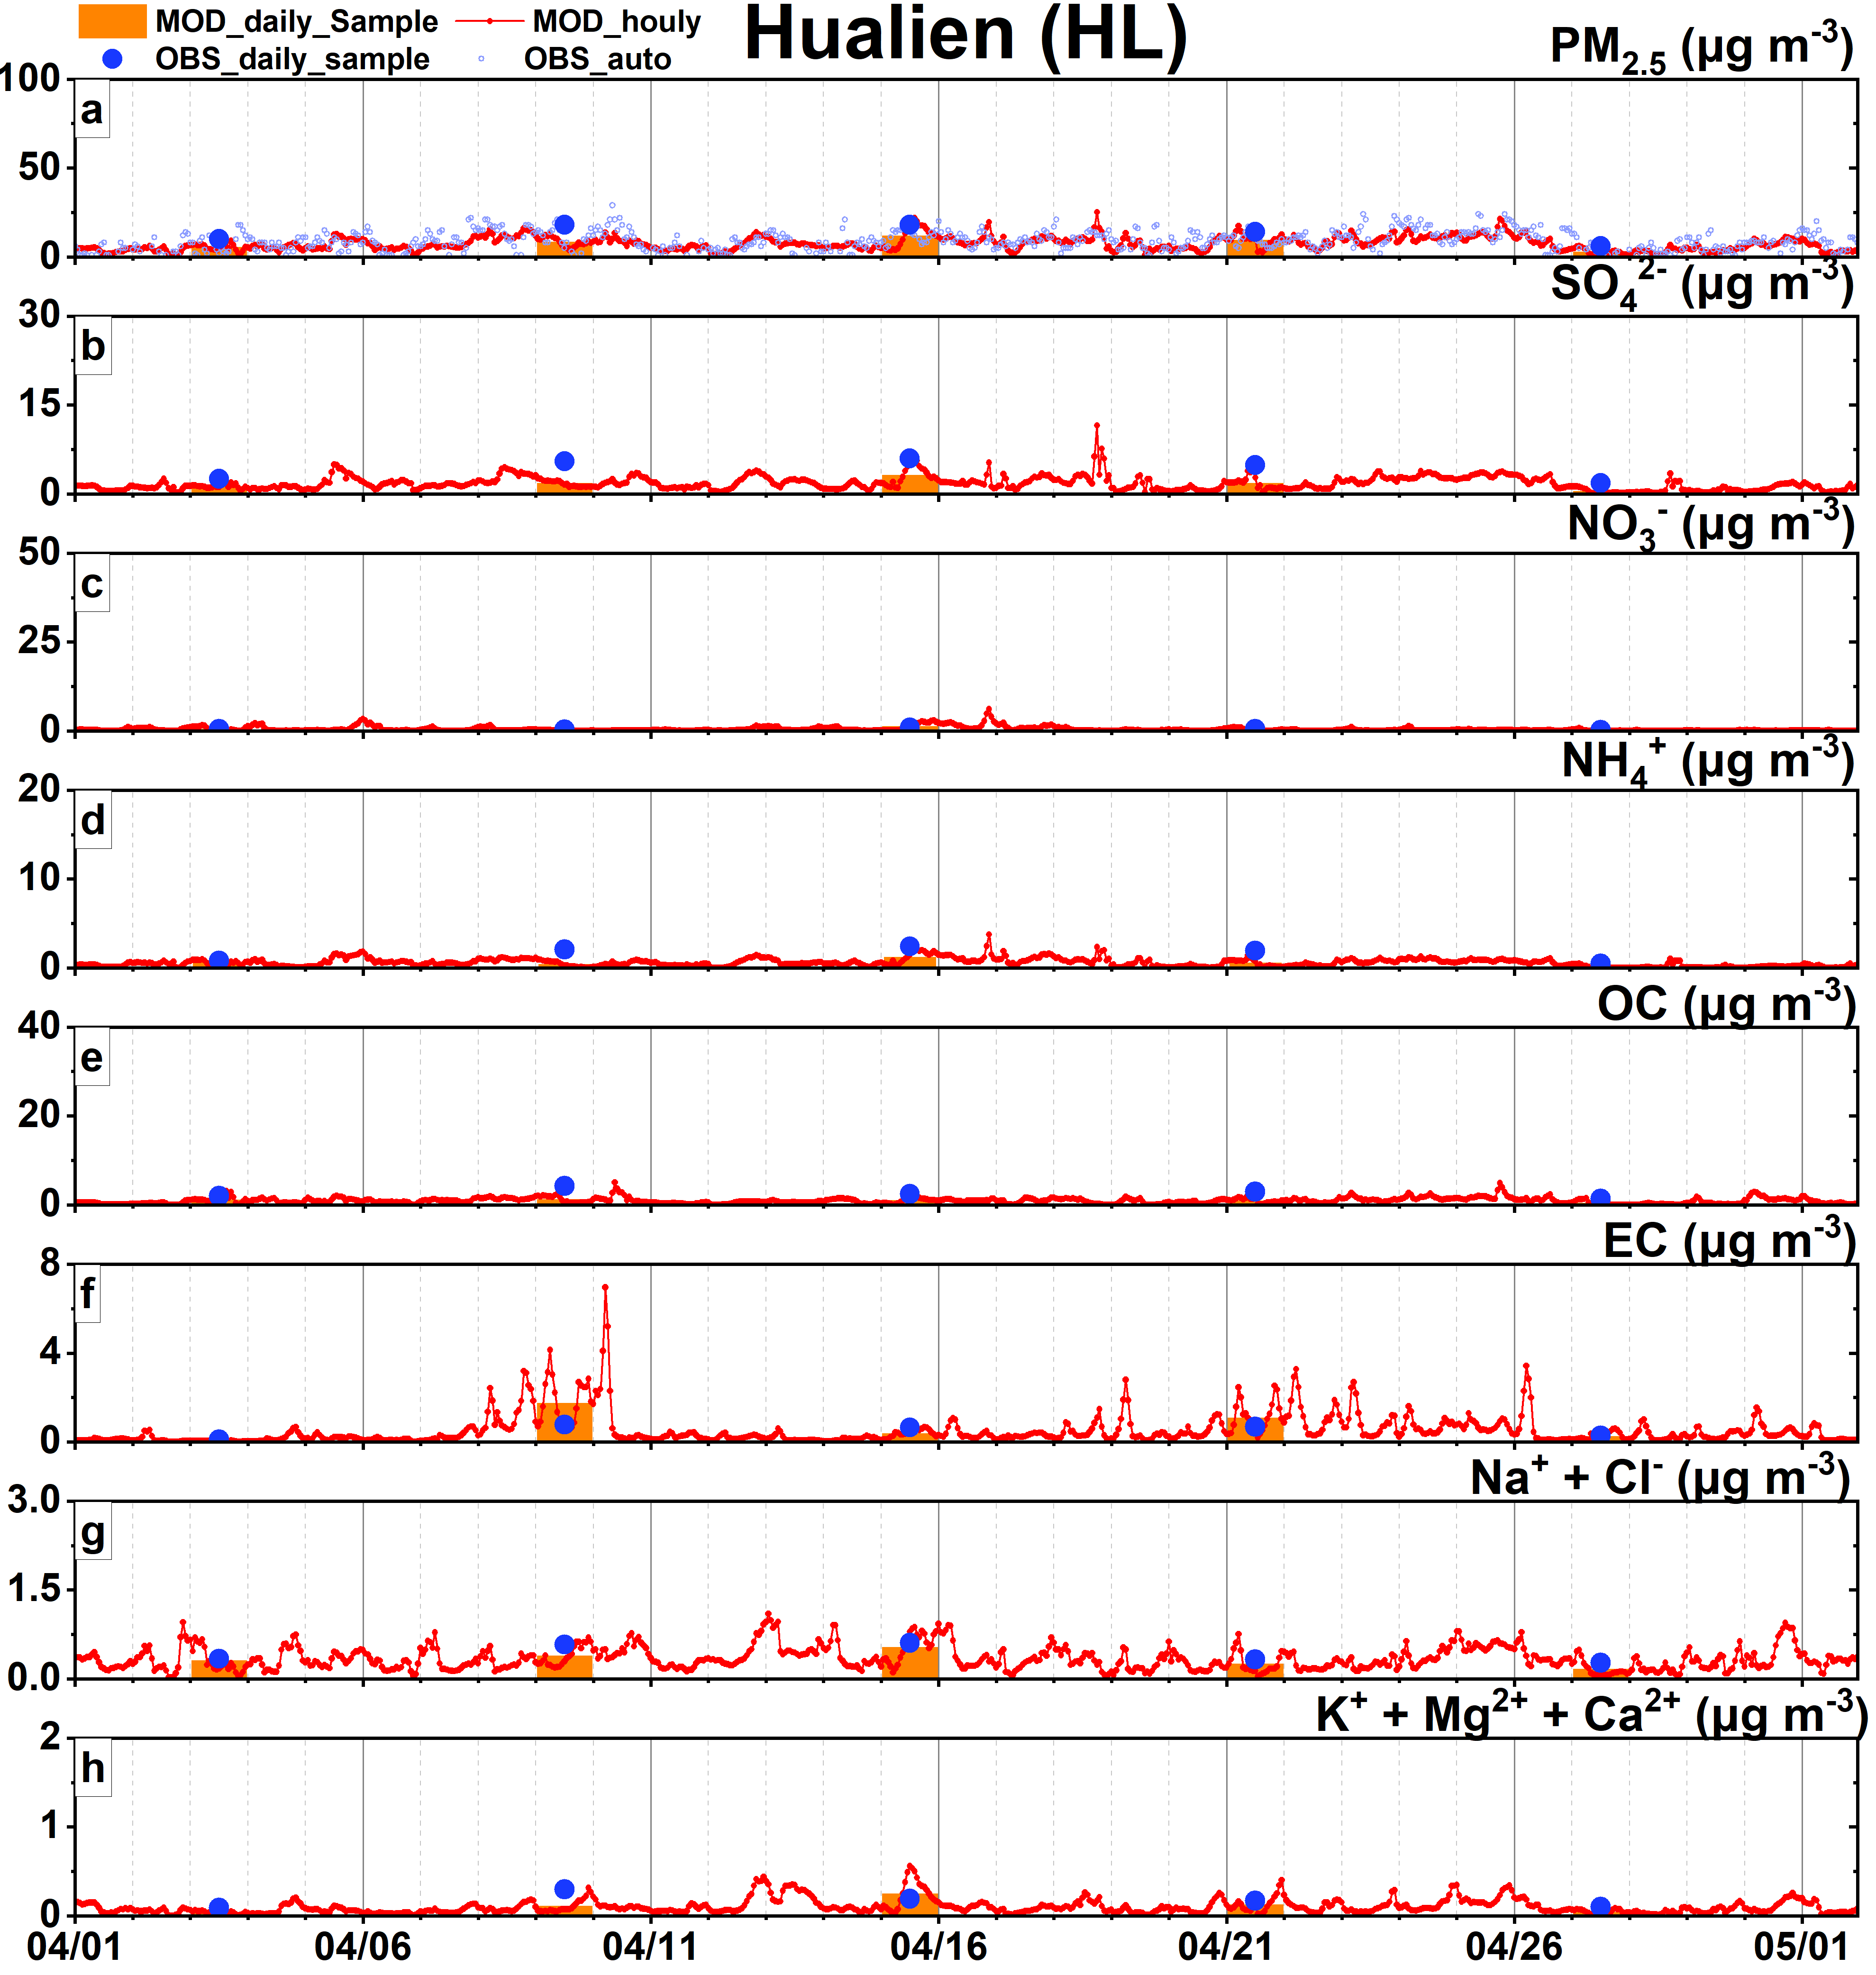


Fig S7-6 The time series of modeled and observed PM2.5 and PM2.5 species at Hualien (HL) station in domain4.


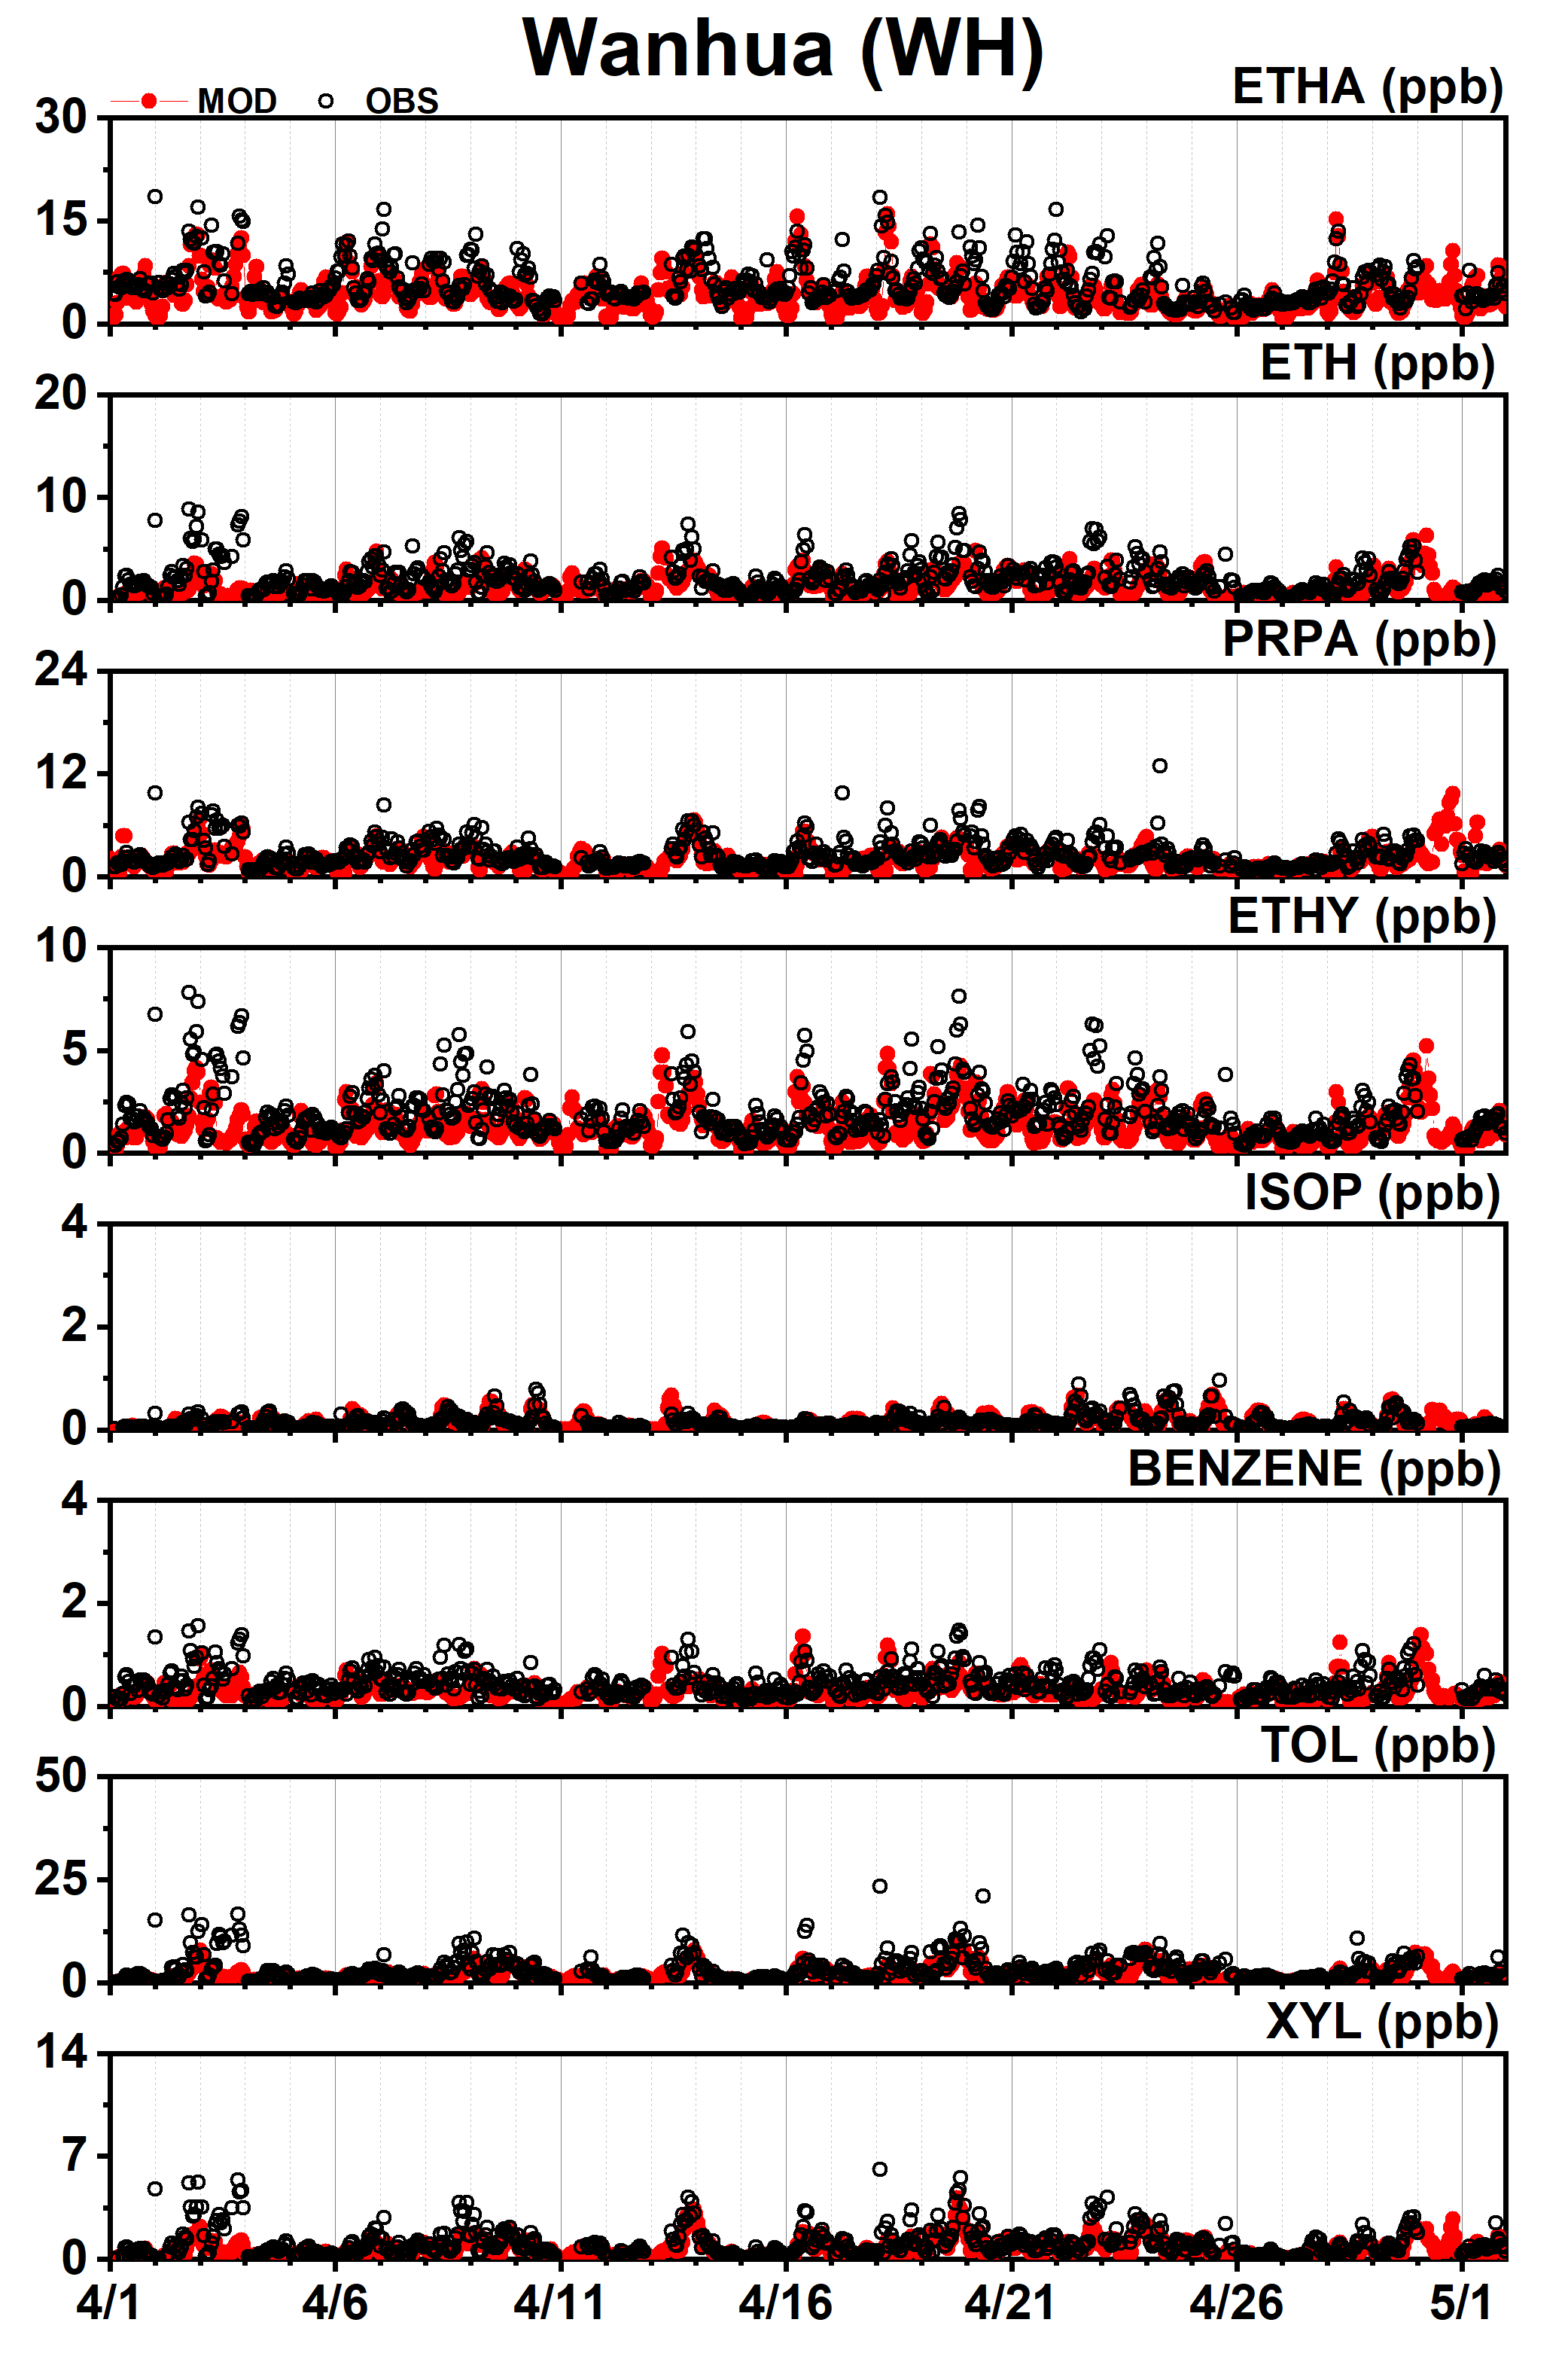


Fig S8-1 The time series of modeled and observed VOCs at Wanhua (WH) station in domain4.


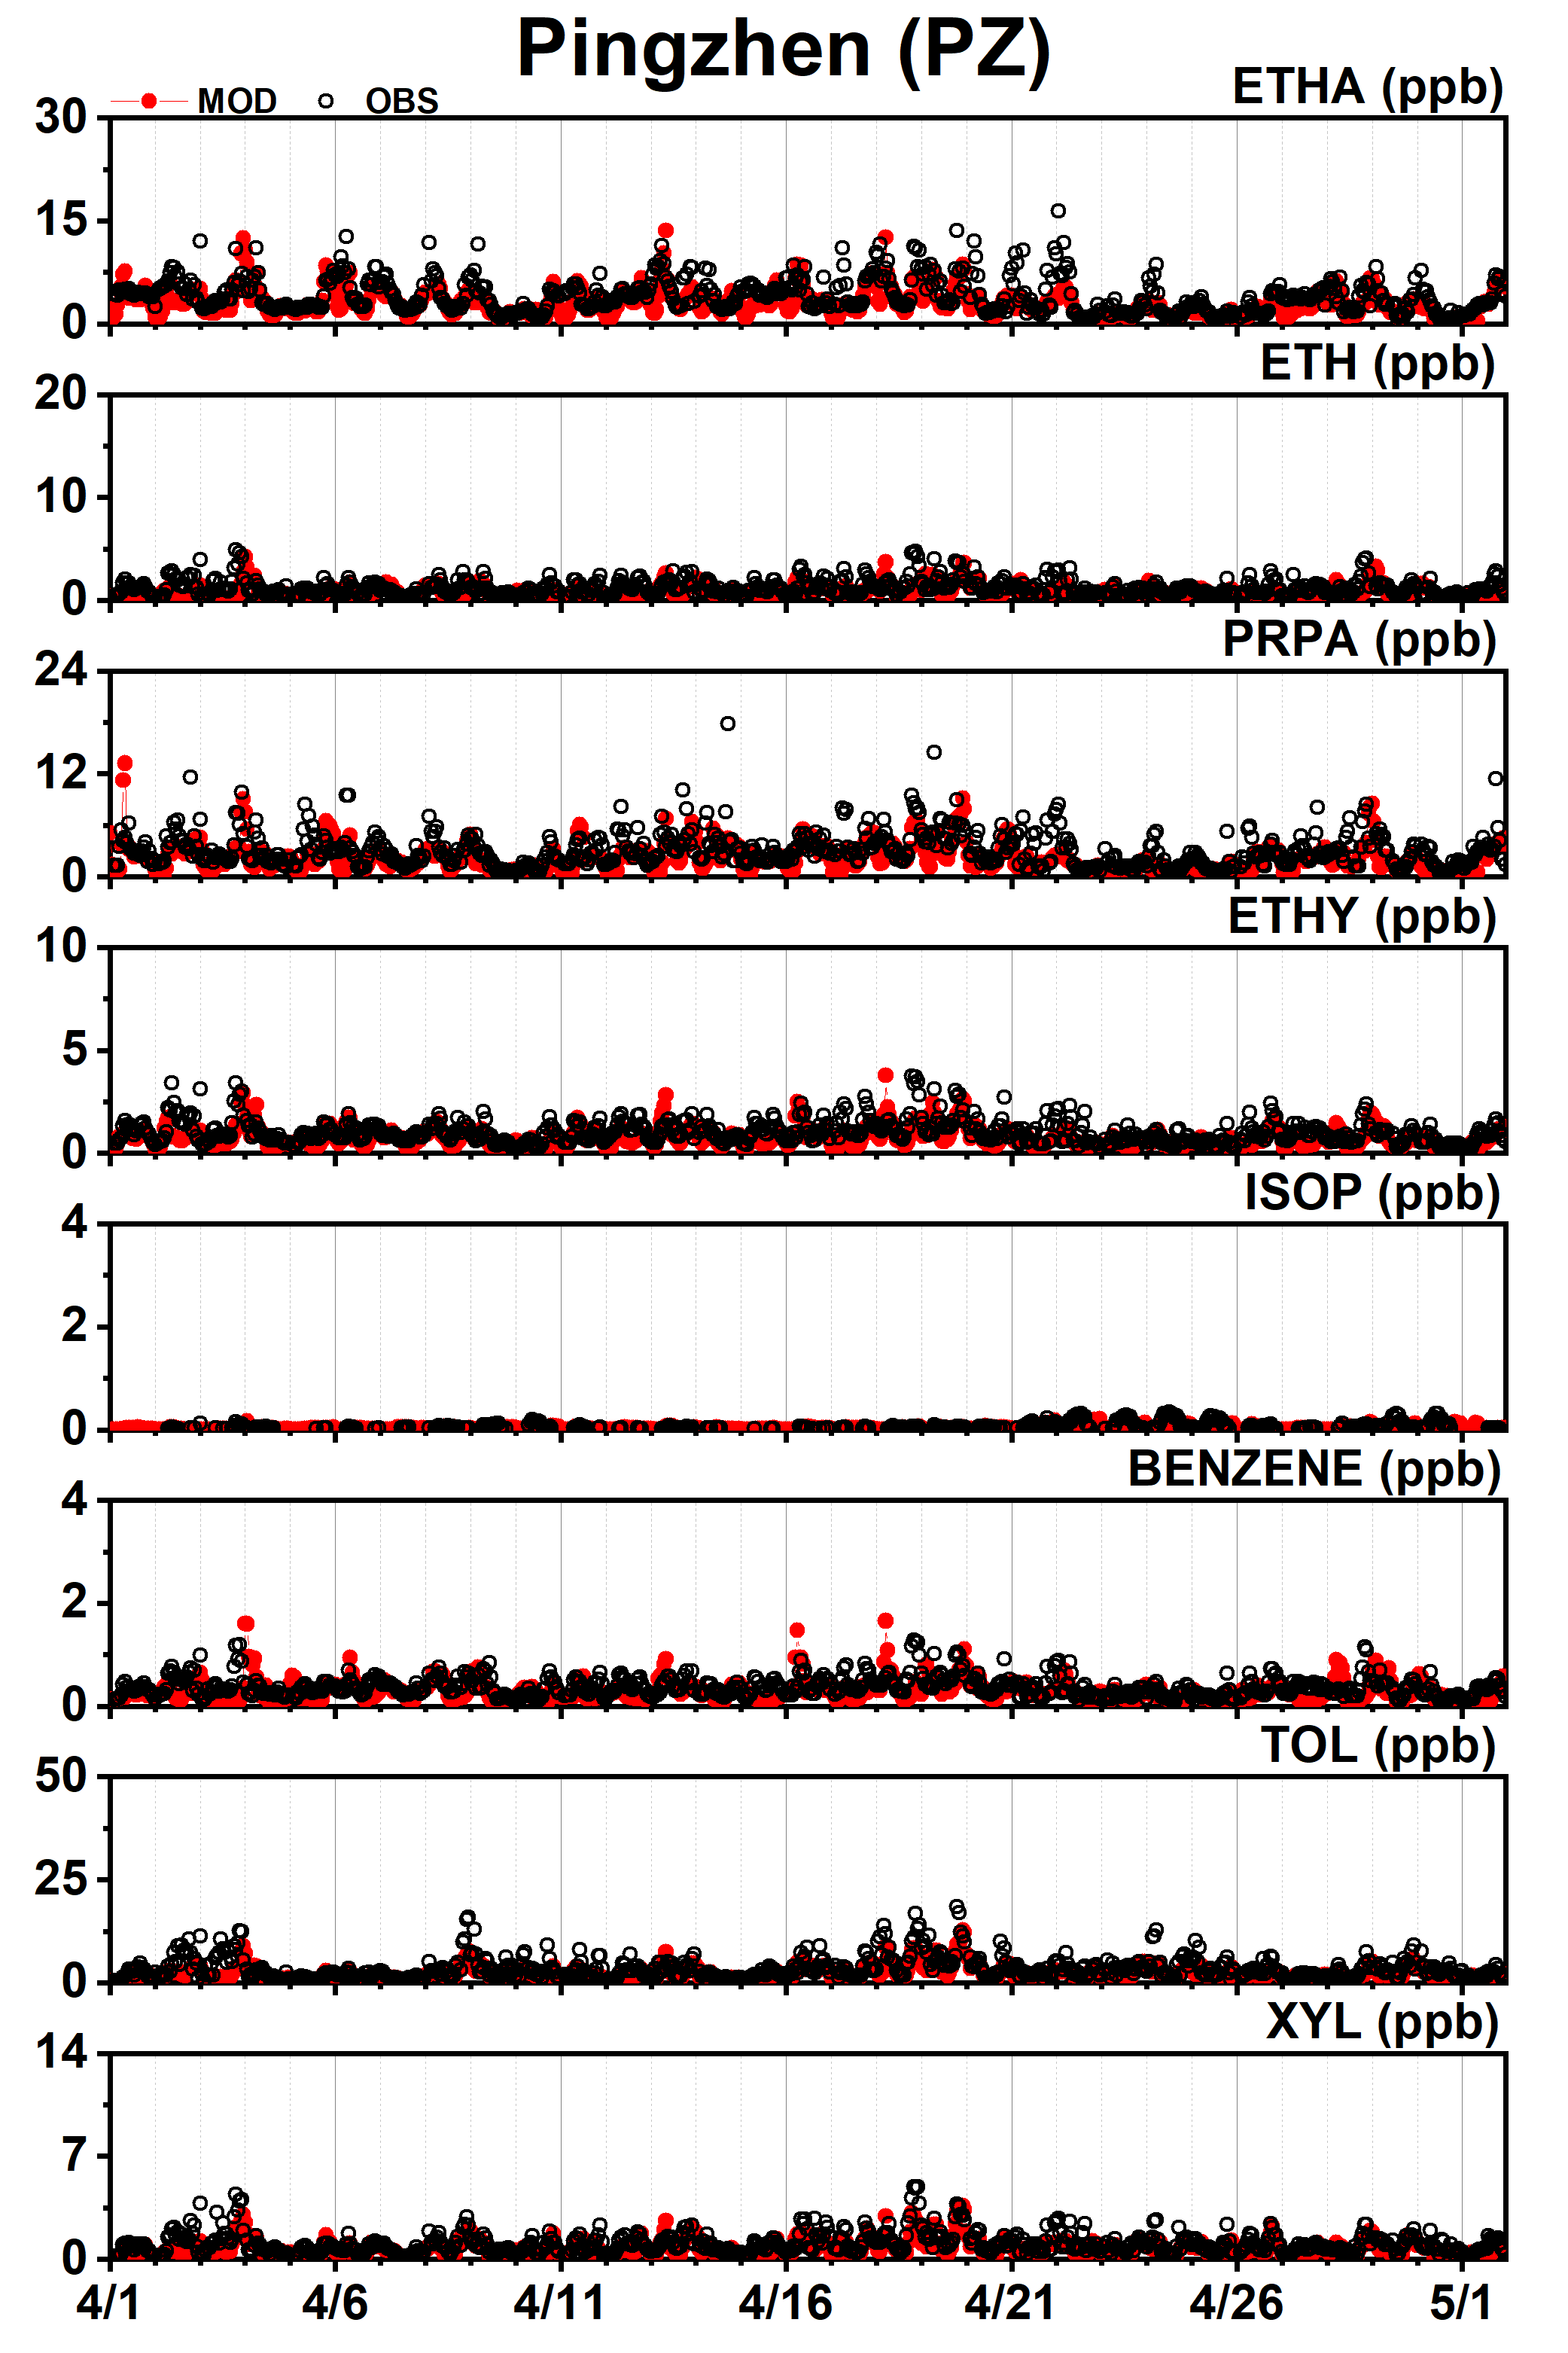


Fig. S8-3 The time series of modeled and observed VOCs at Pingzhen (PZ) station in domain4.
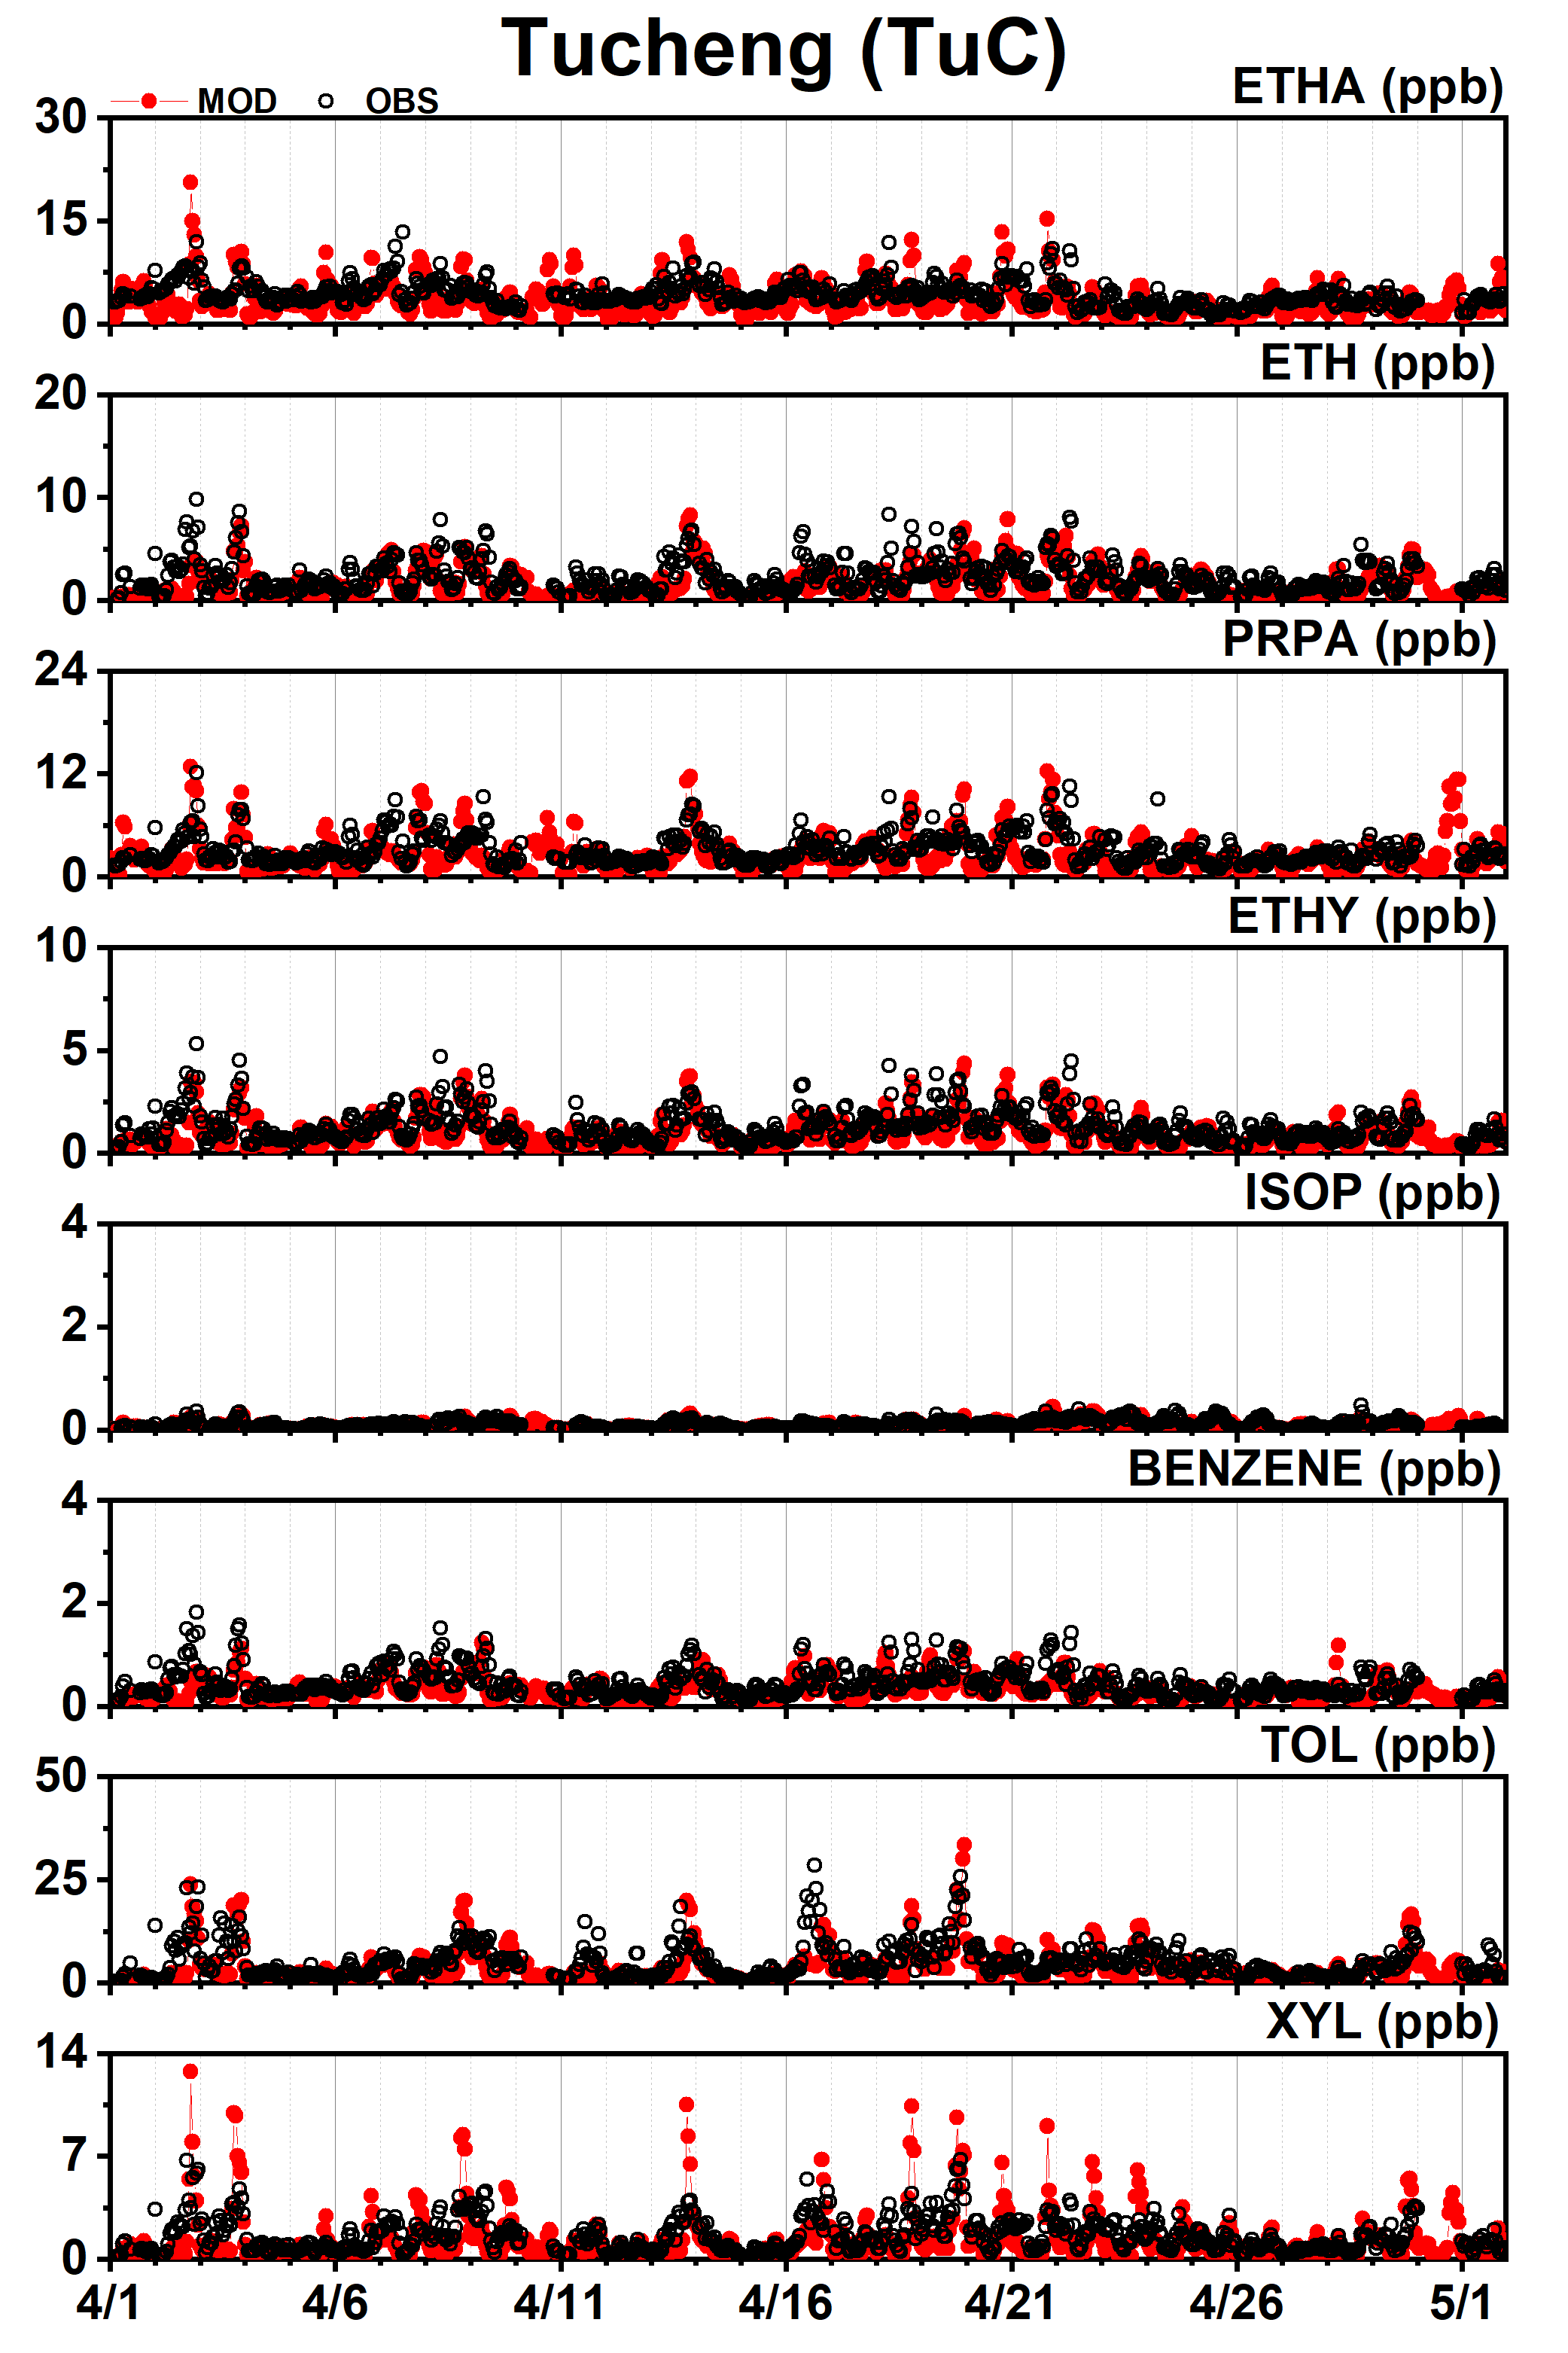


Fig S8-2 The time series of modeled and observed VOCs at Tucheng (TuC) station in domain4
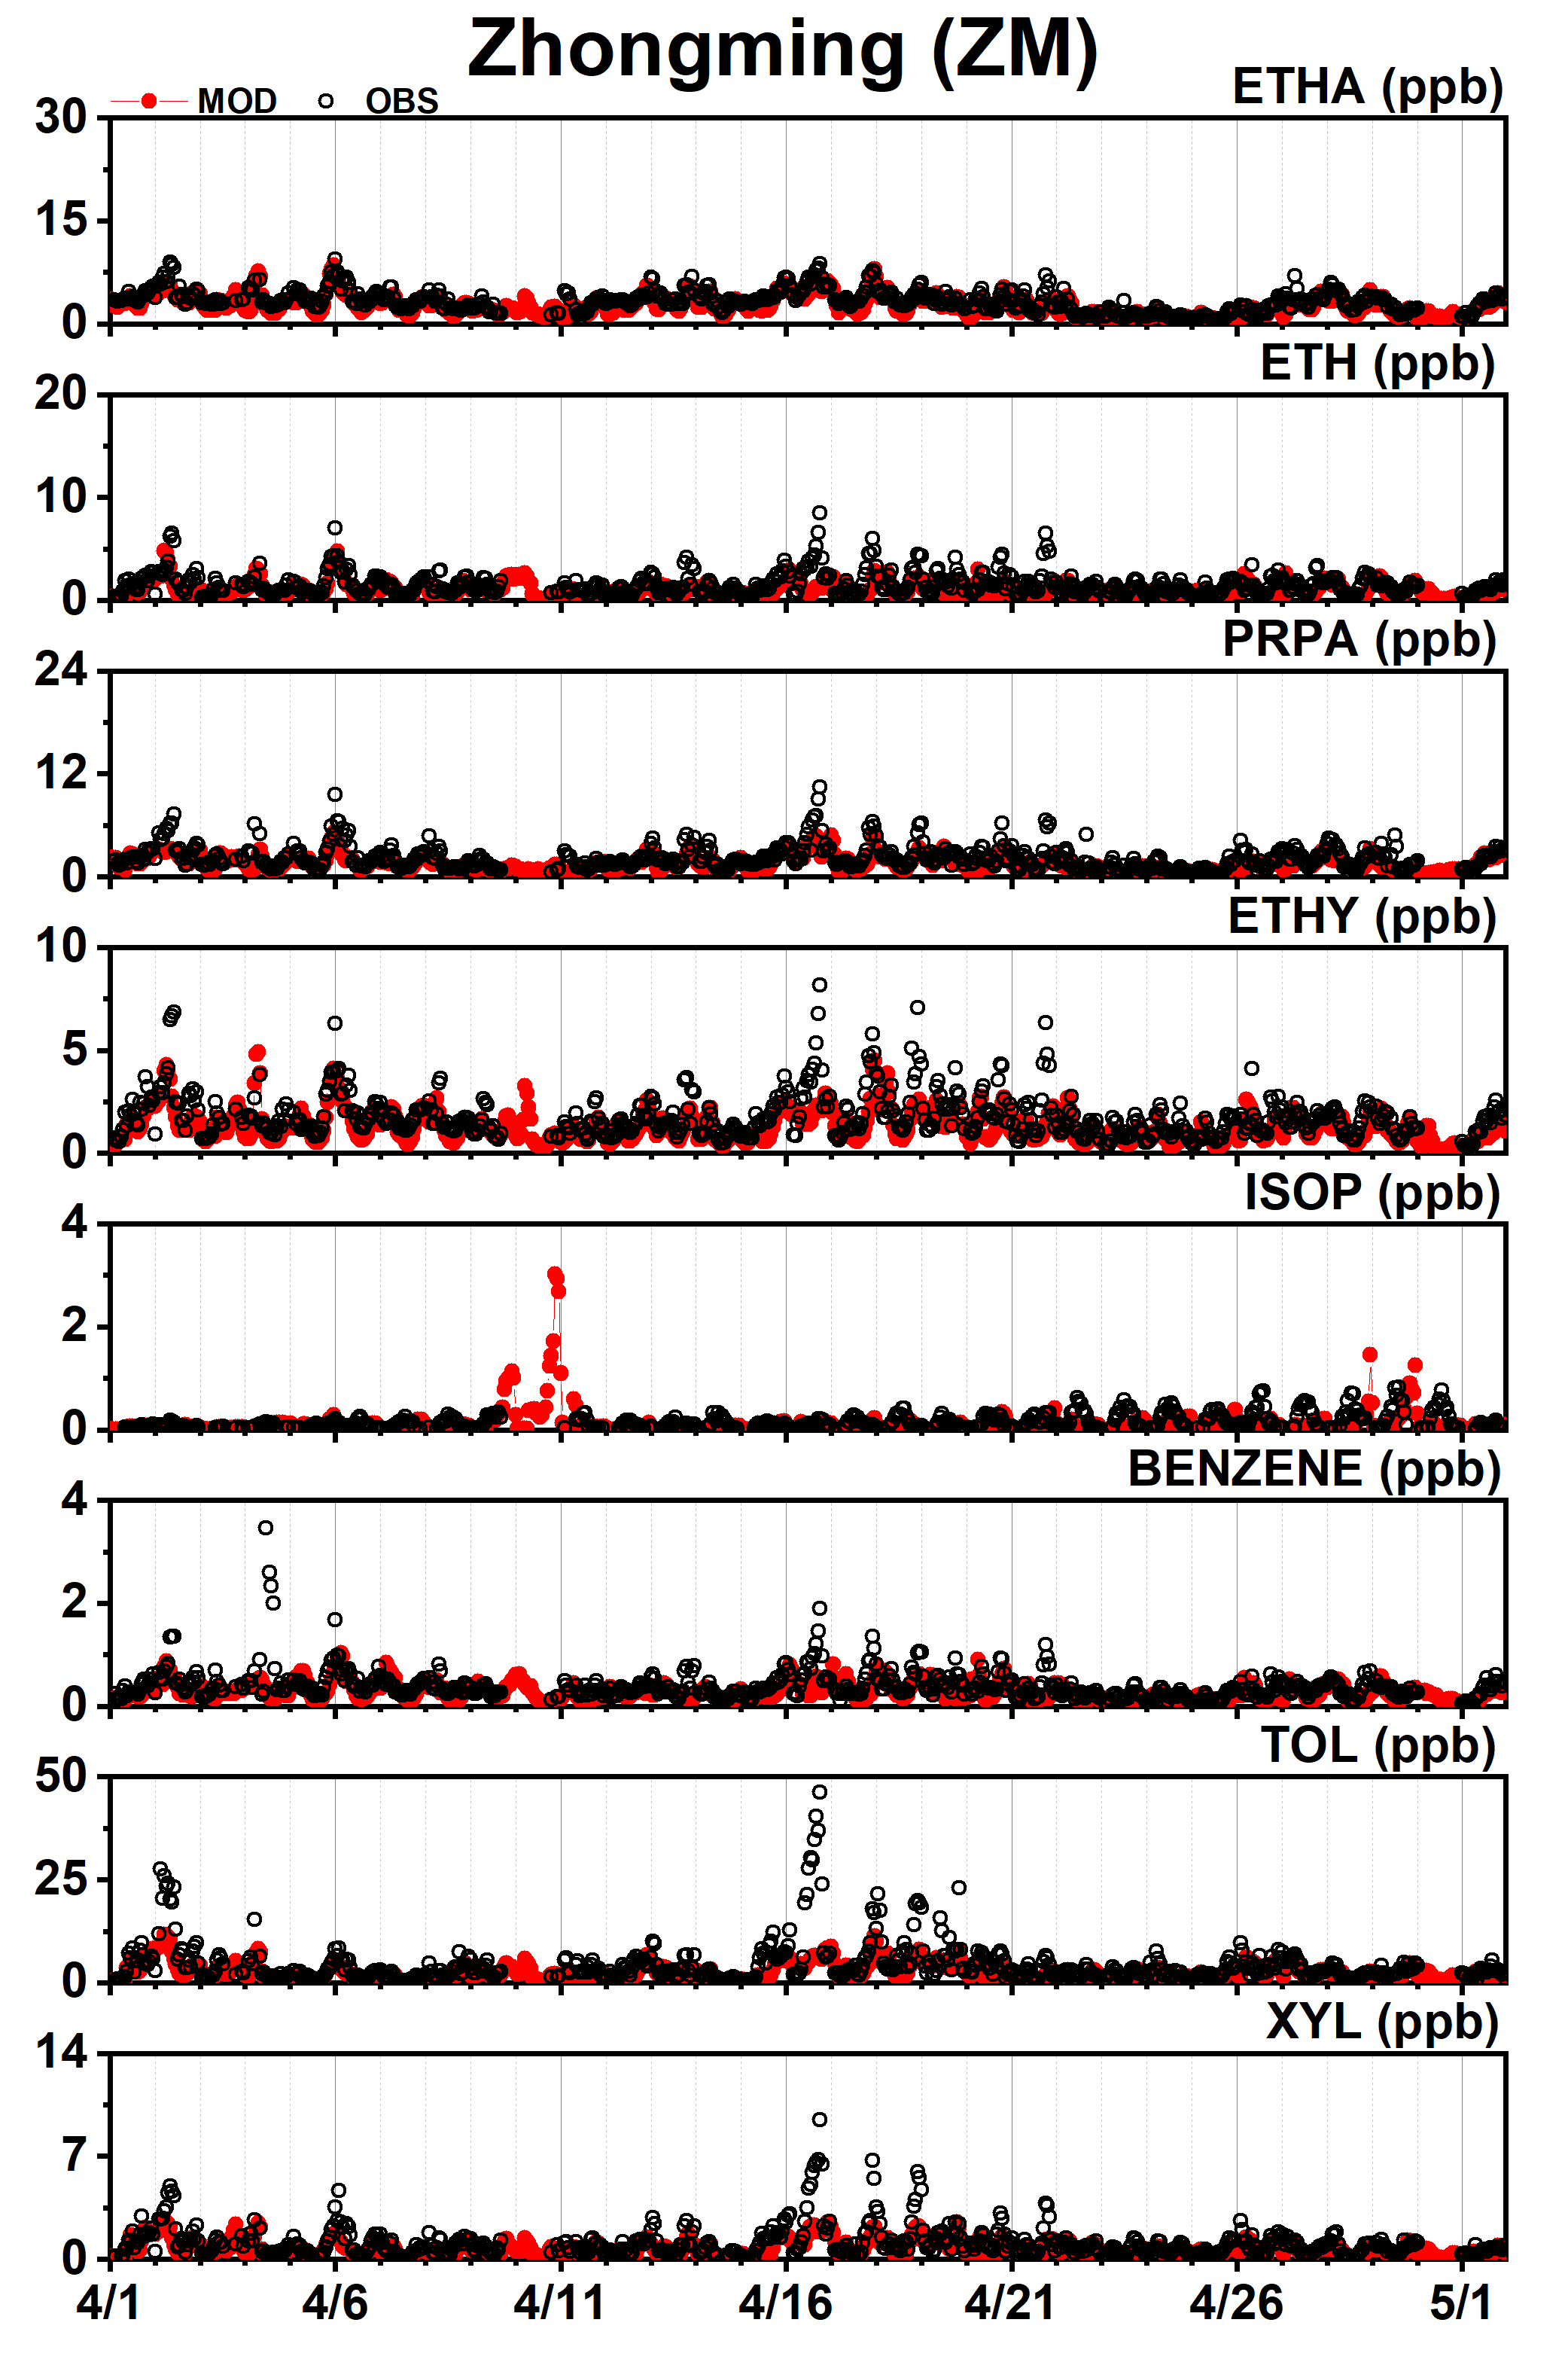


Fig. S8-4 The time series of modeled and observed VOCs at Zhongming (ZM) station in domain4.


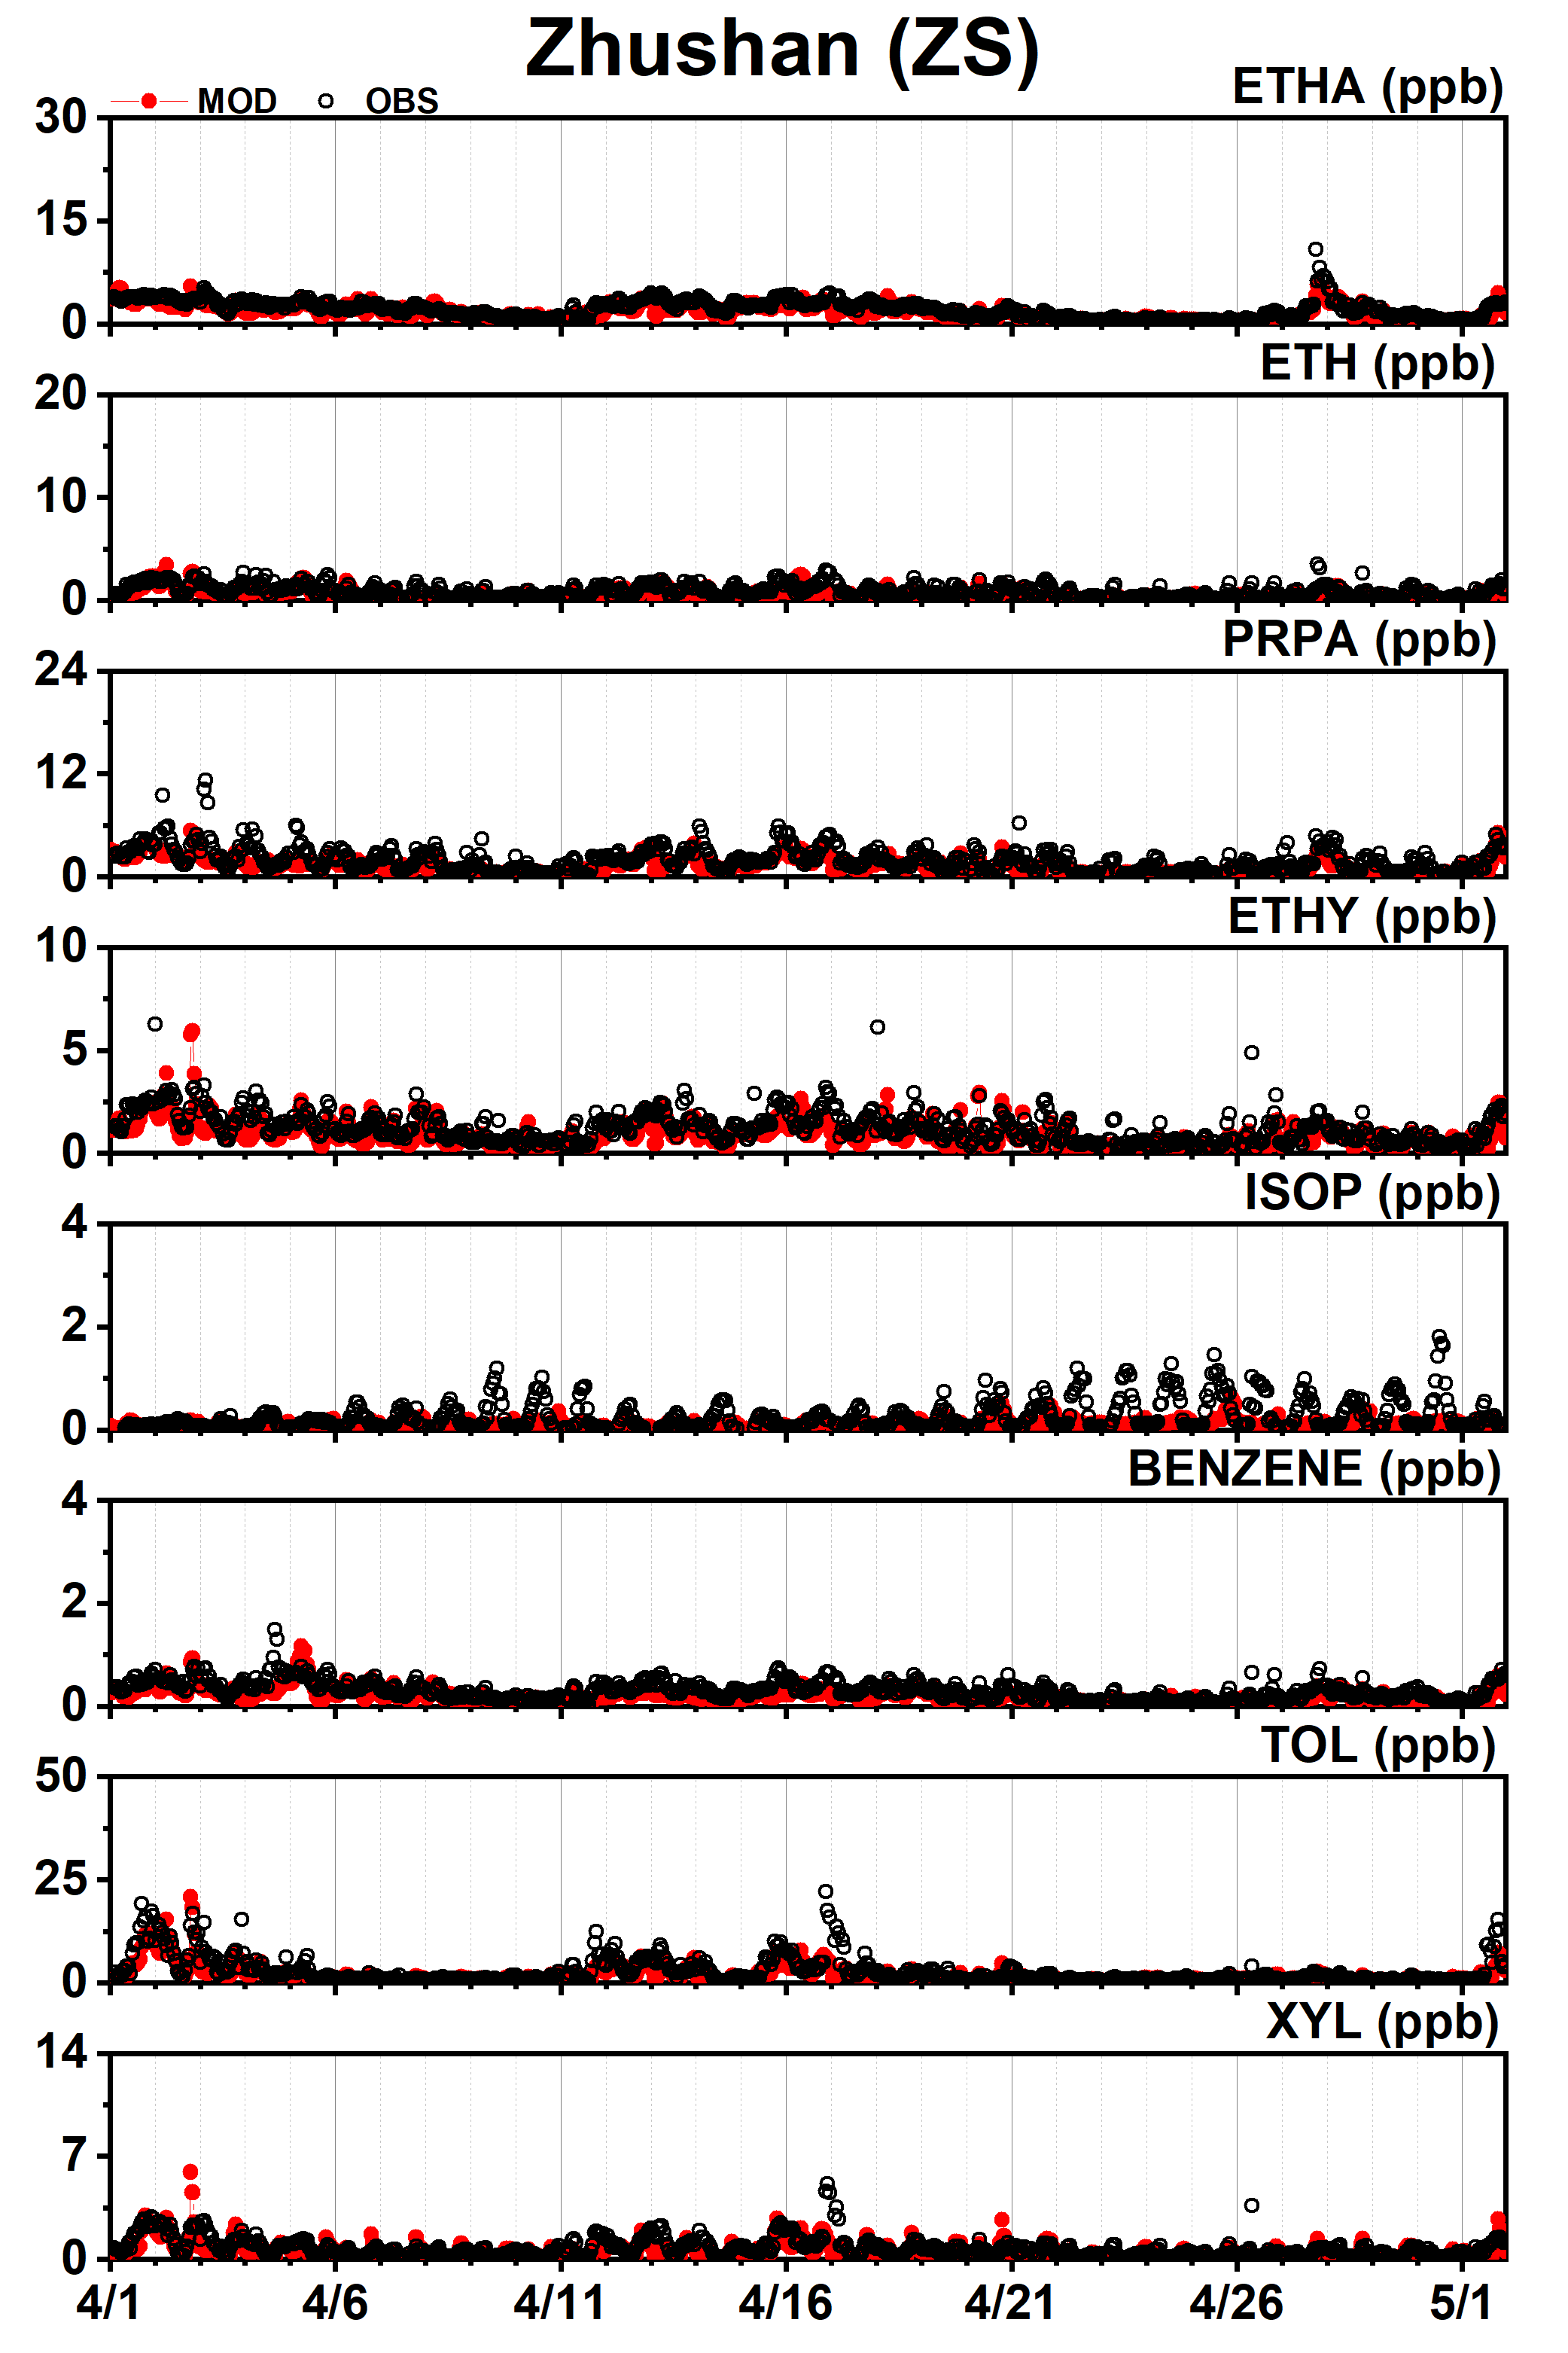


Fig. S8-5 The time series of modeled and observed VOCs at Zhushan (ZuS) station in domain4.
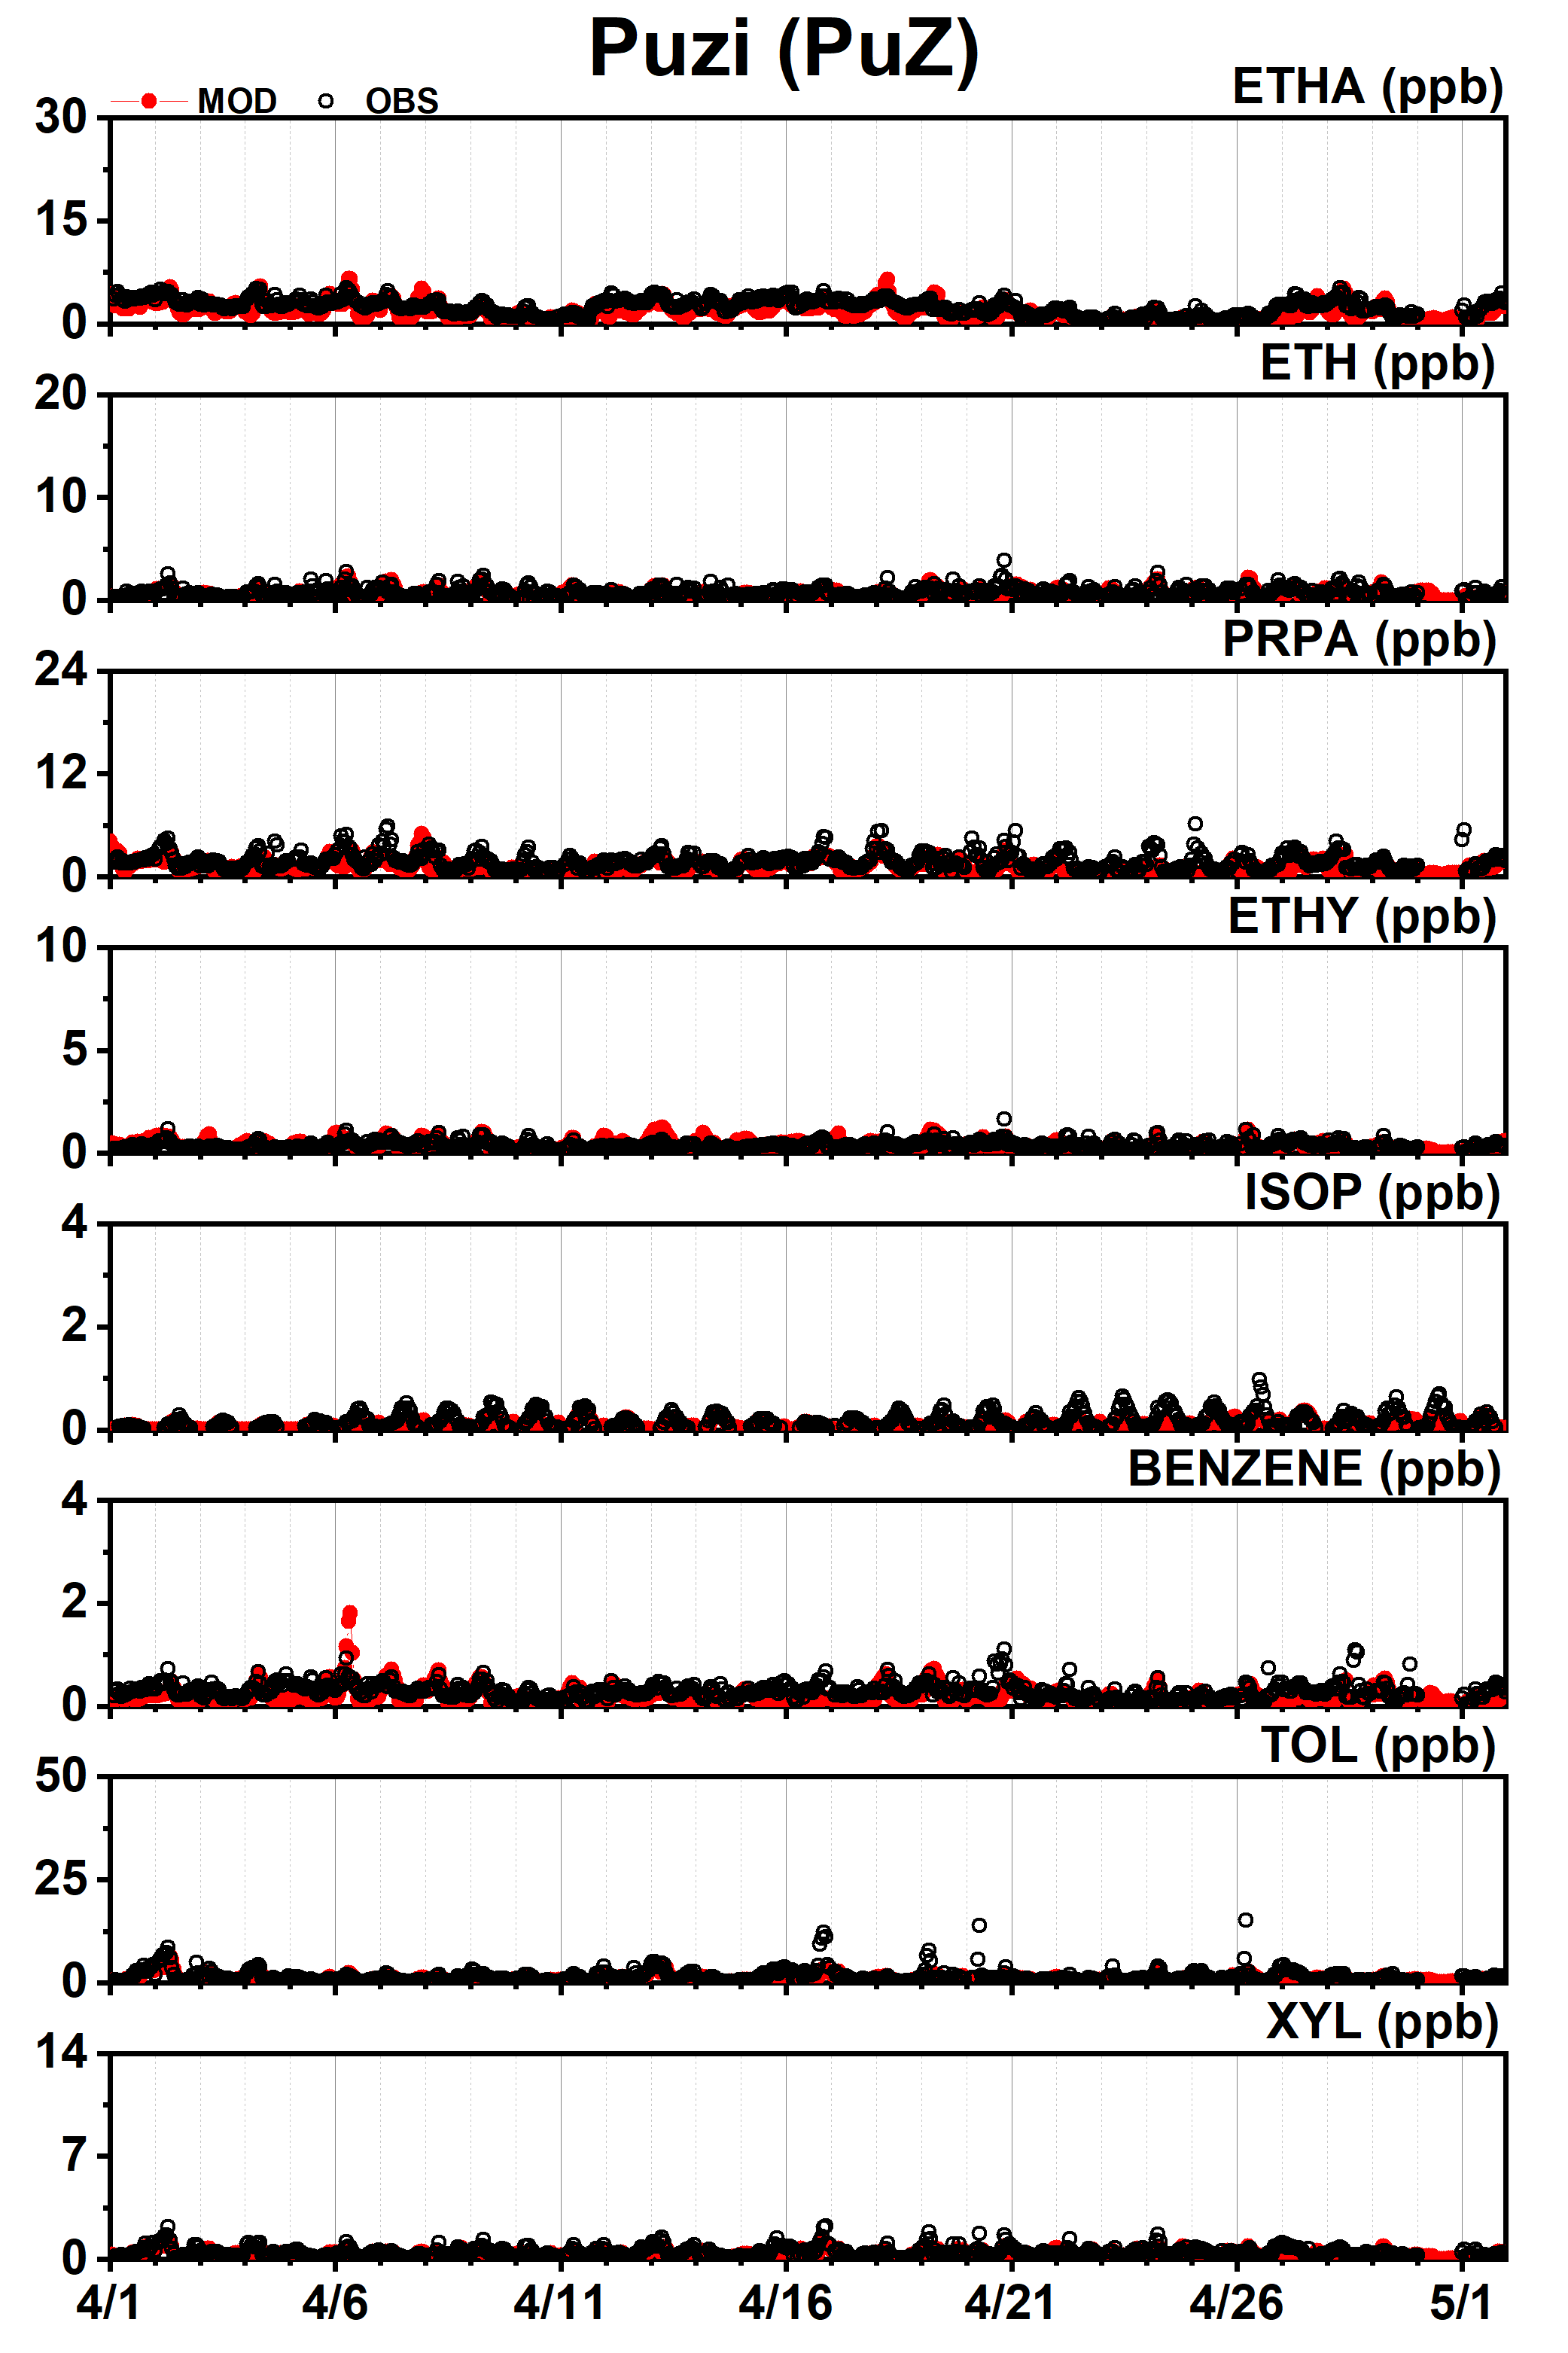


Fig. S8-7 The time series of modeled and observed VOCs at Puzi (PuZ) station in domain4.


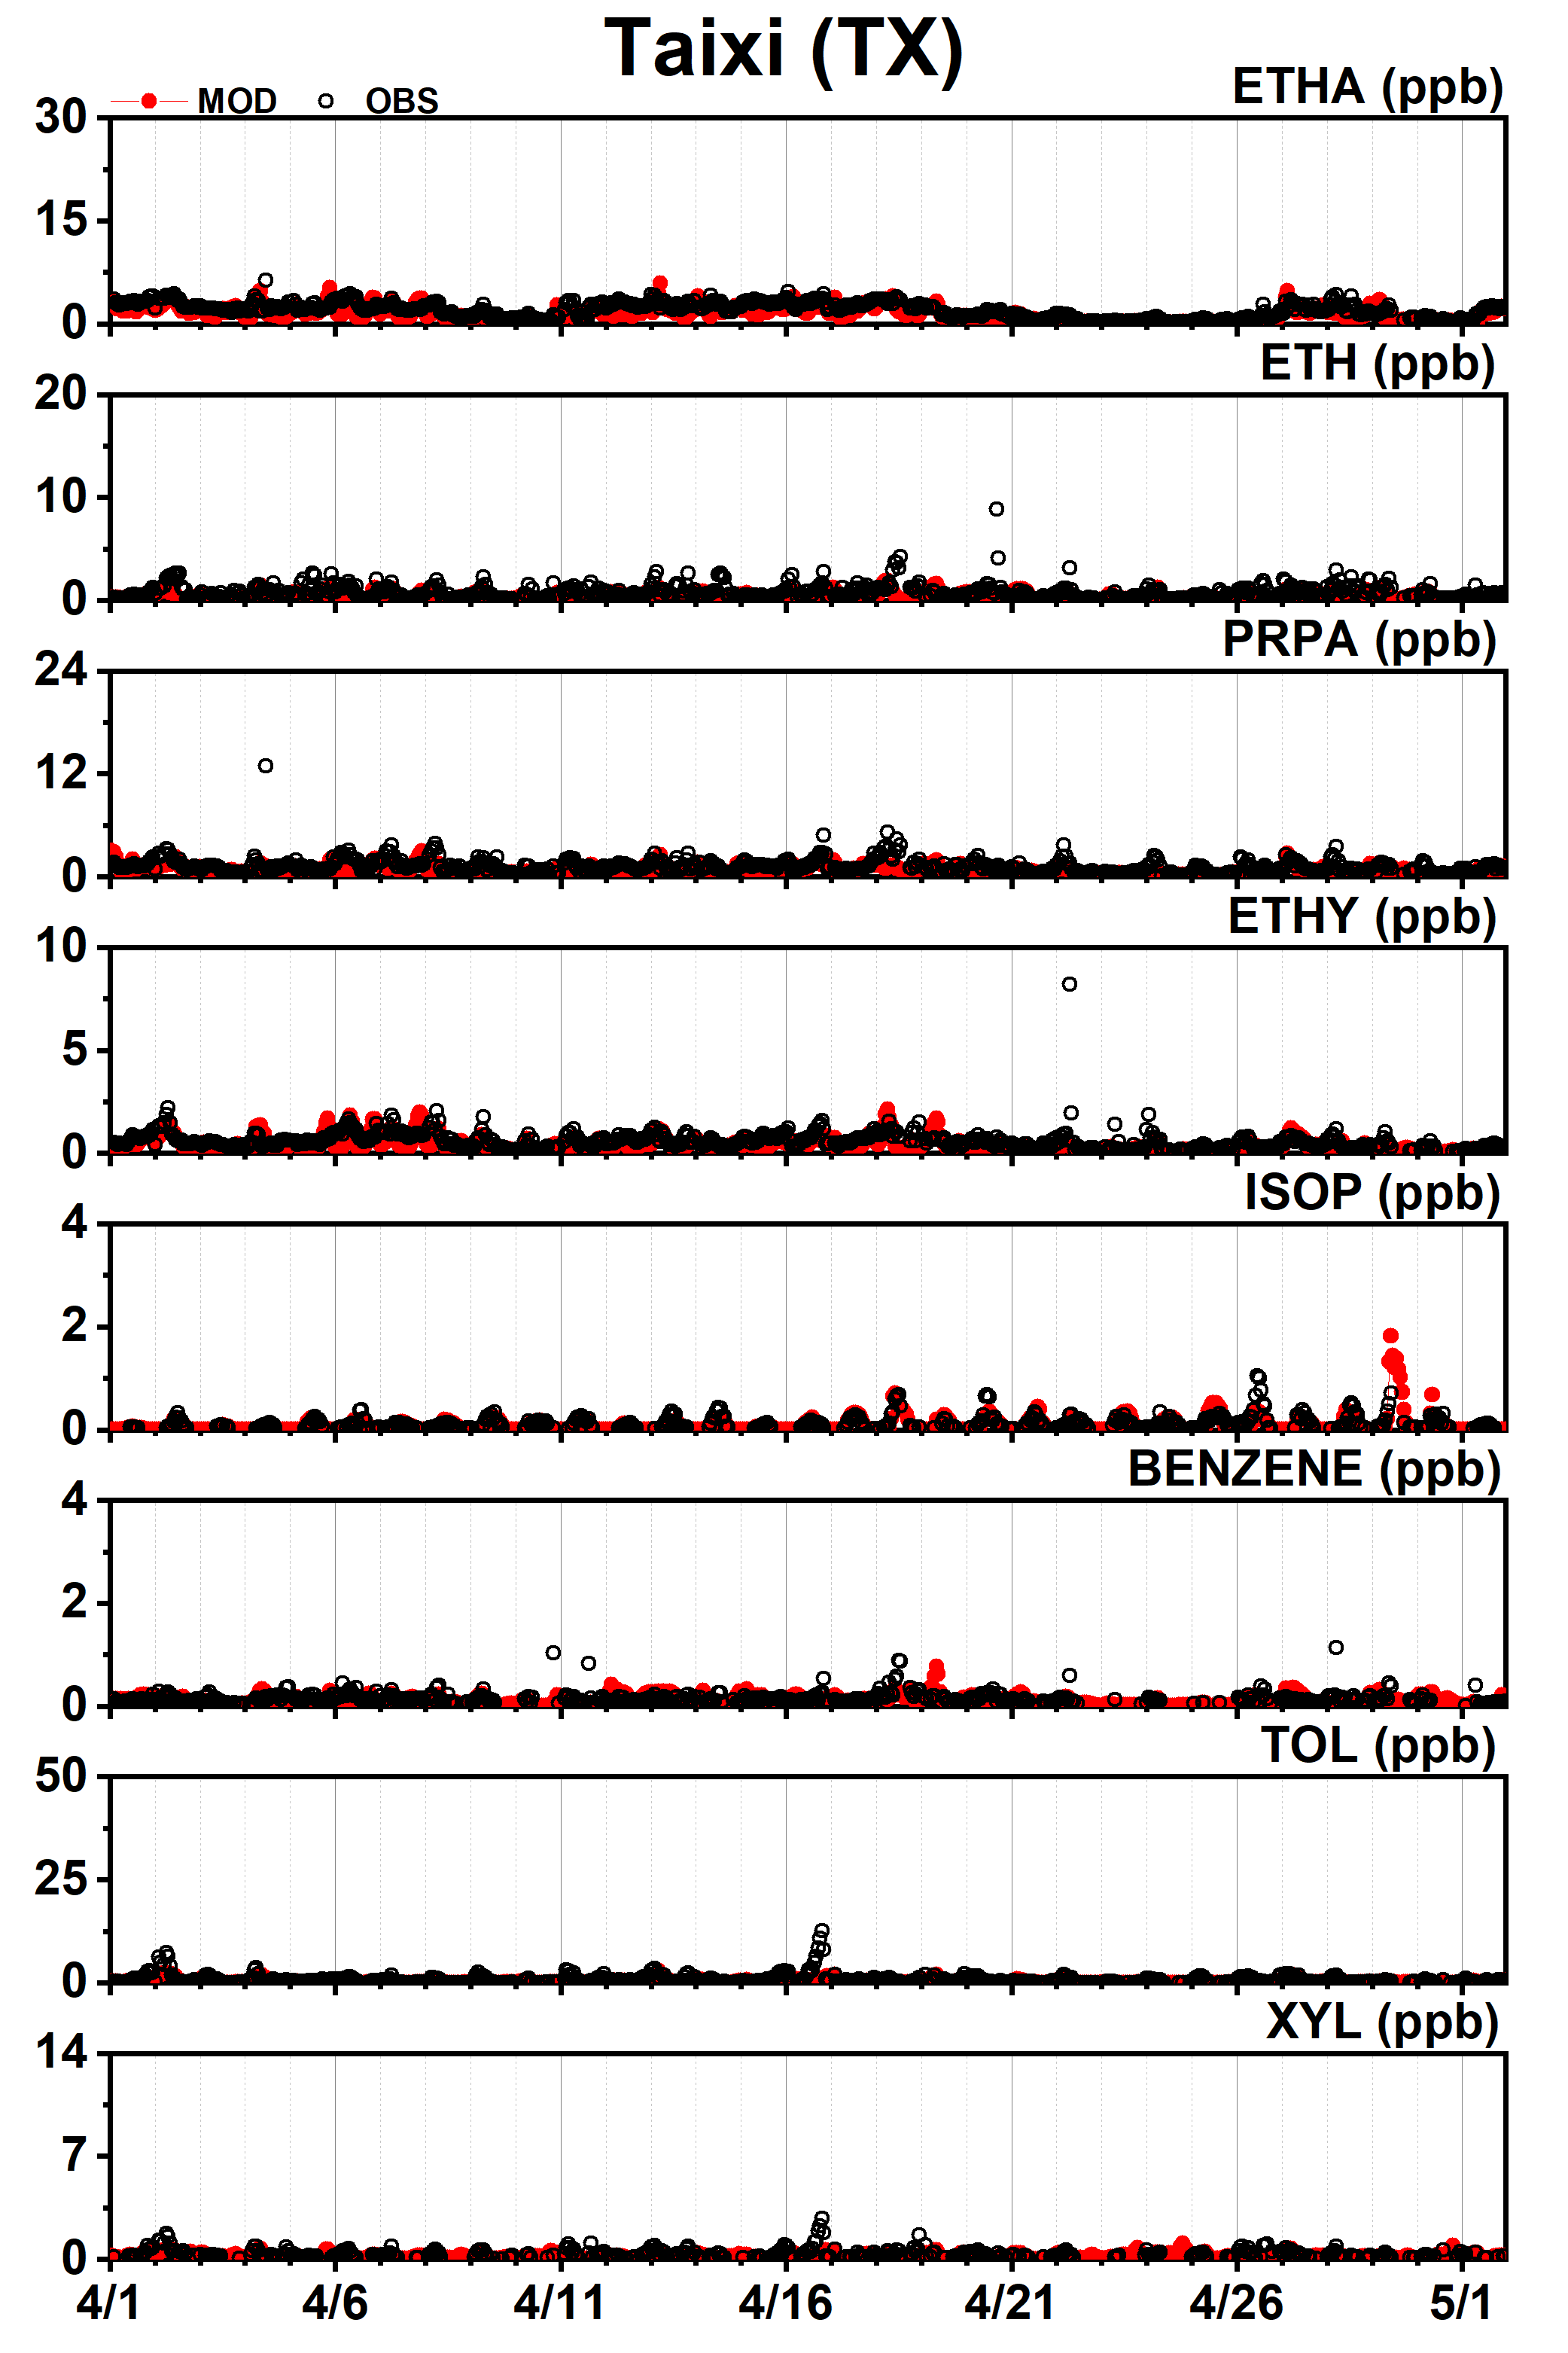


Fig. S8-6 The time series of modeled and observed VOCs at Taixi (TX) station in domain4.


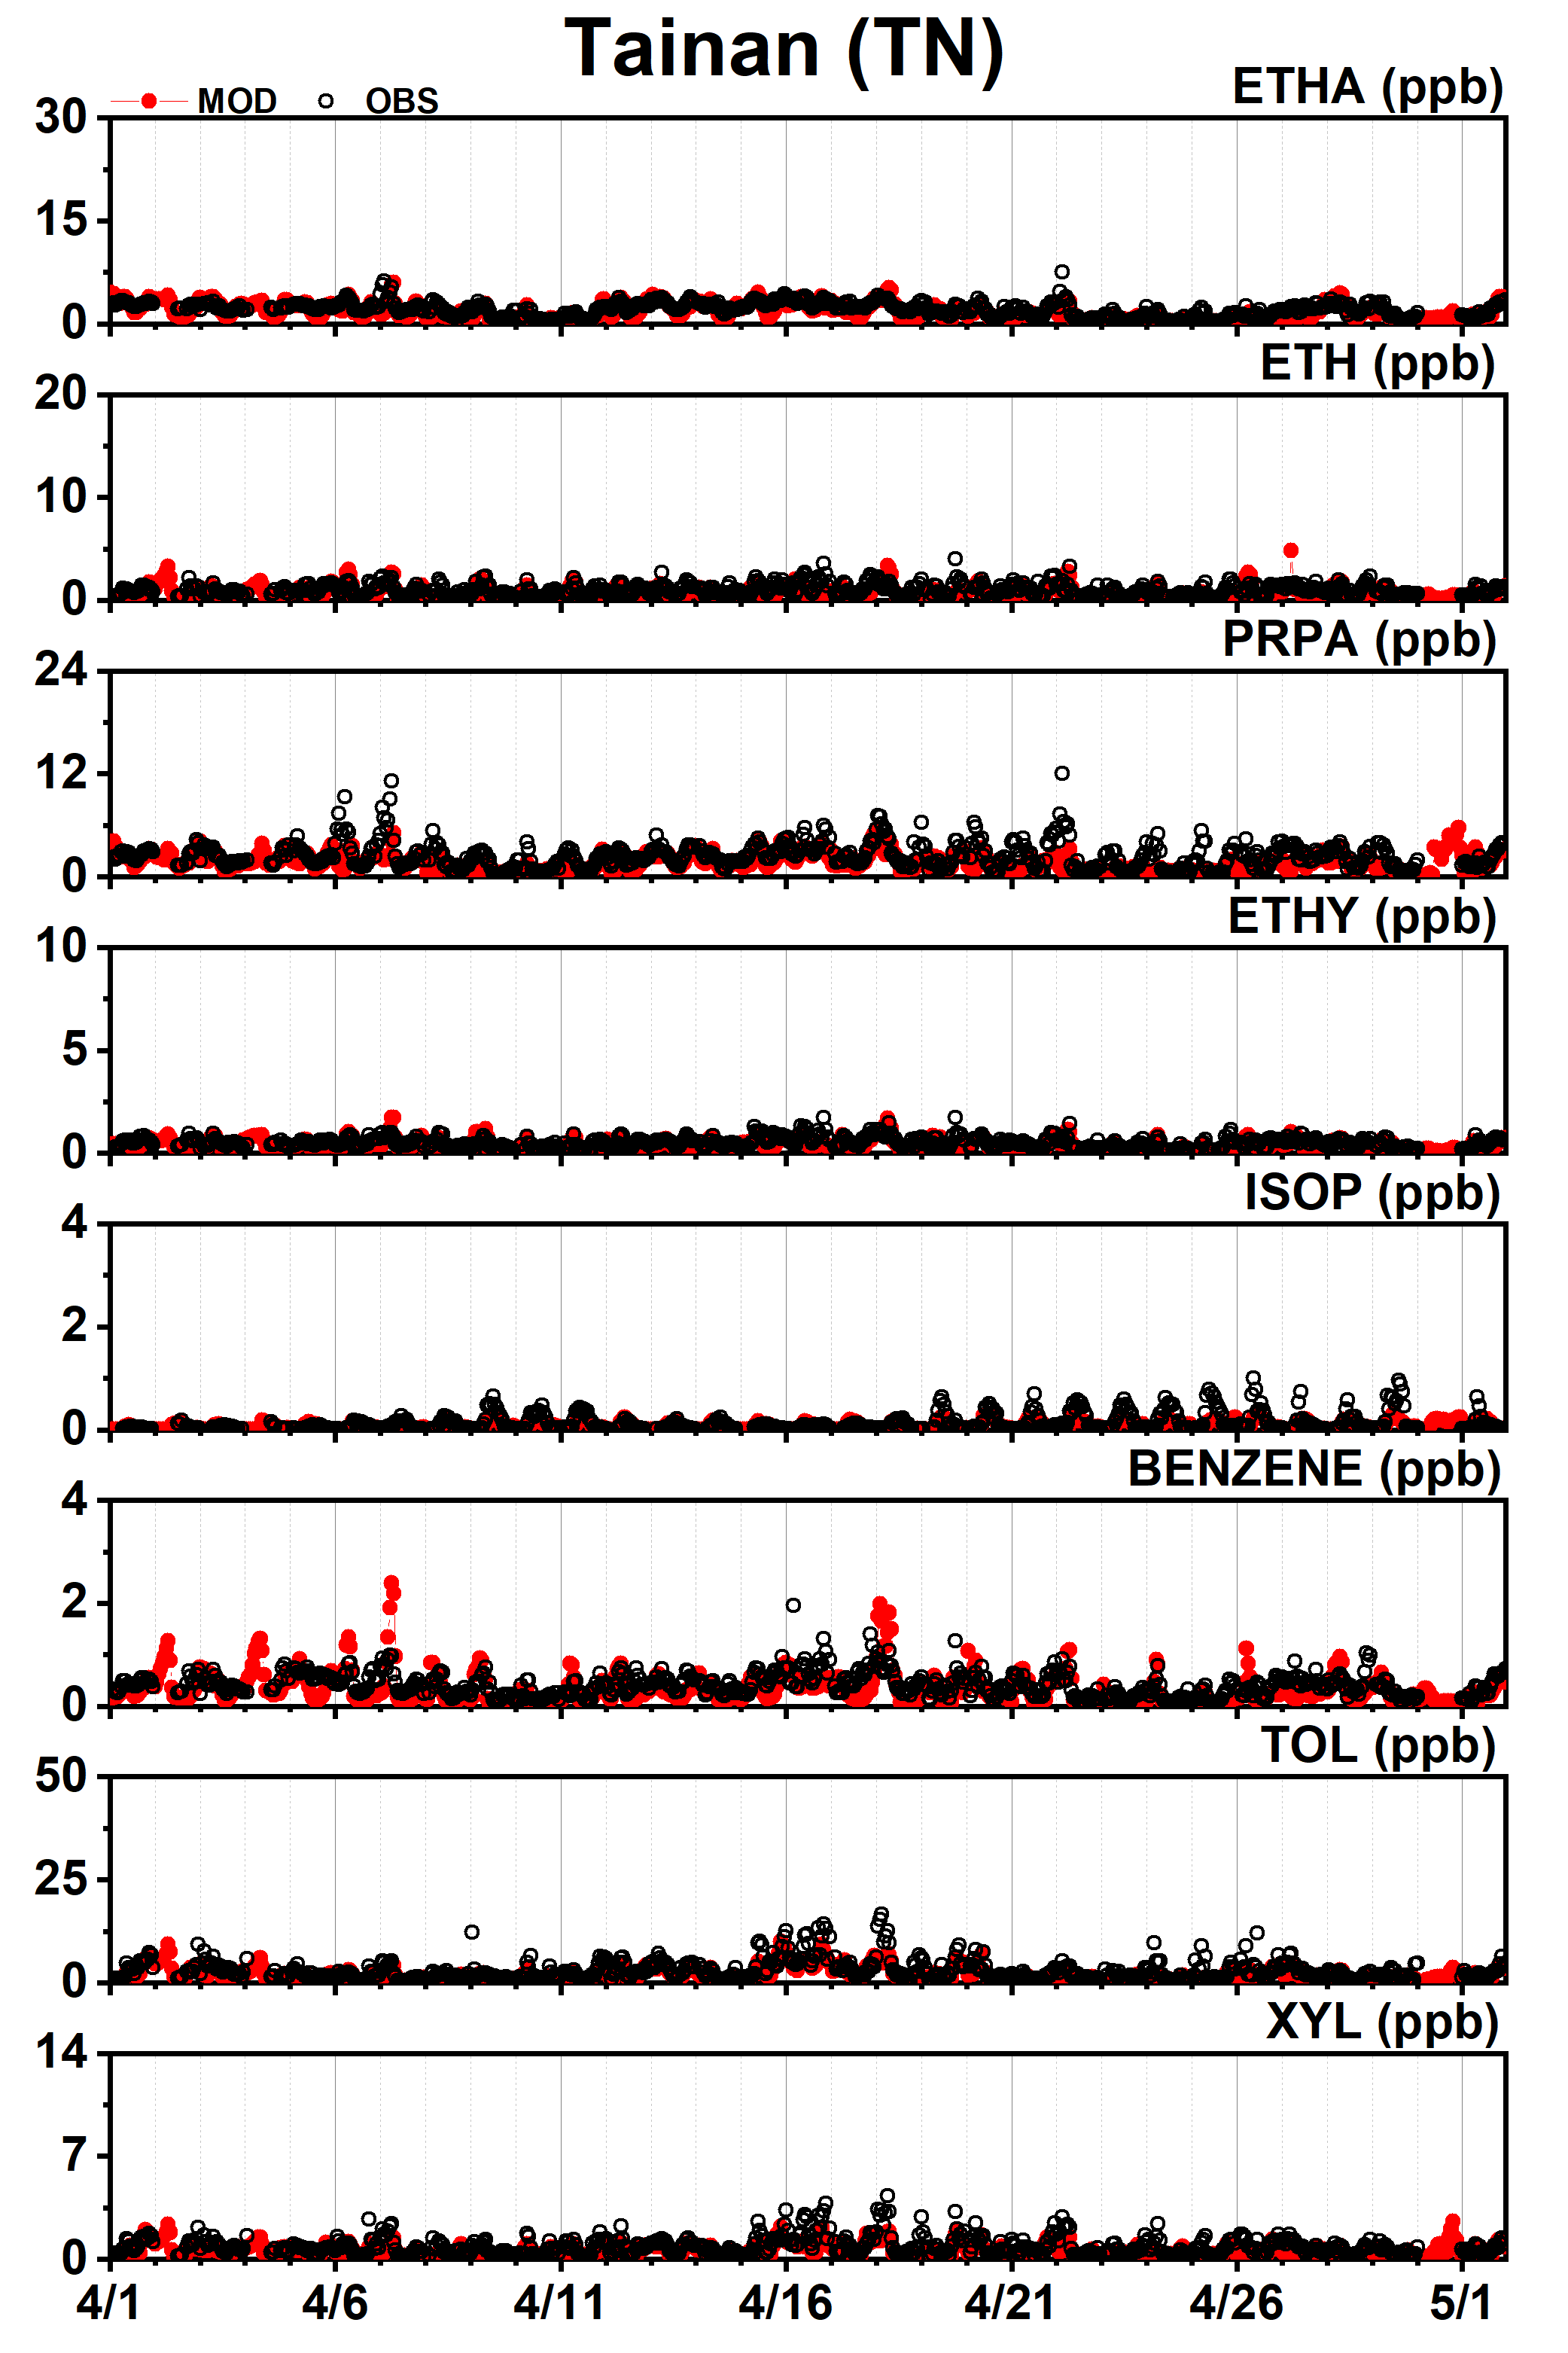


Fig. S8-8 The time series of modeled and observed VOCs at Tainan (TN) station in domain4.


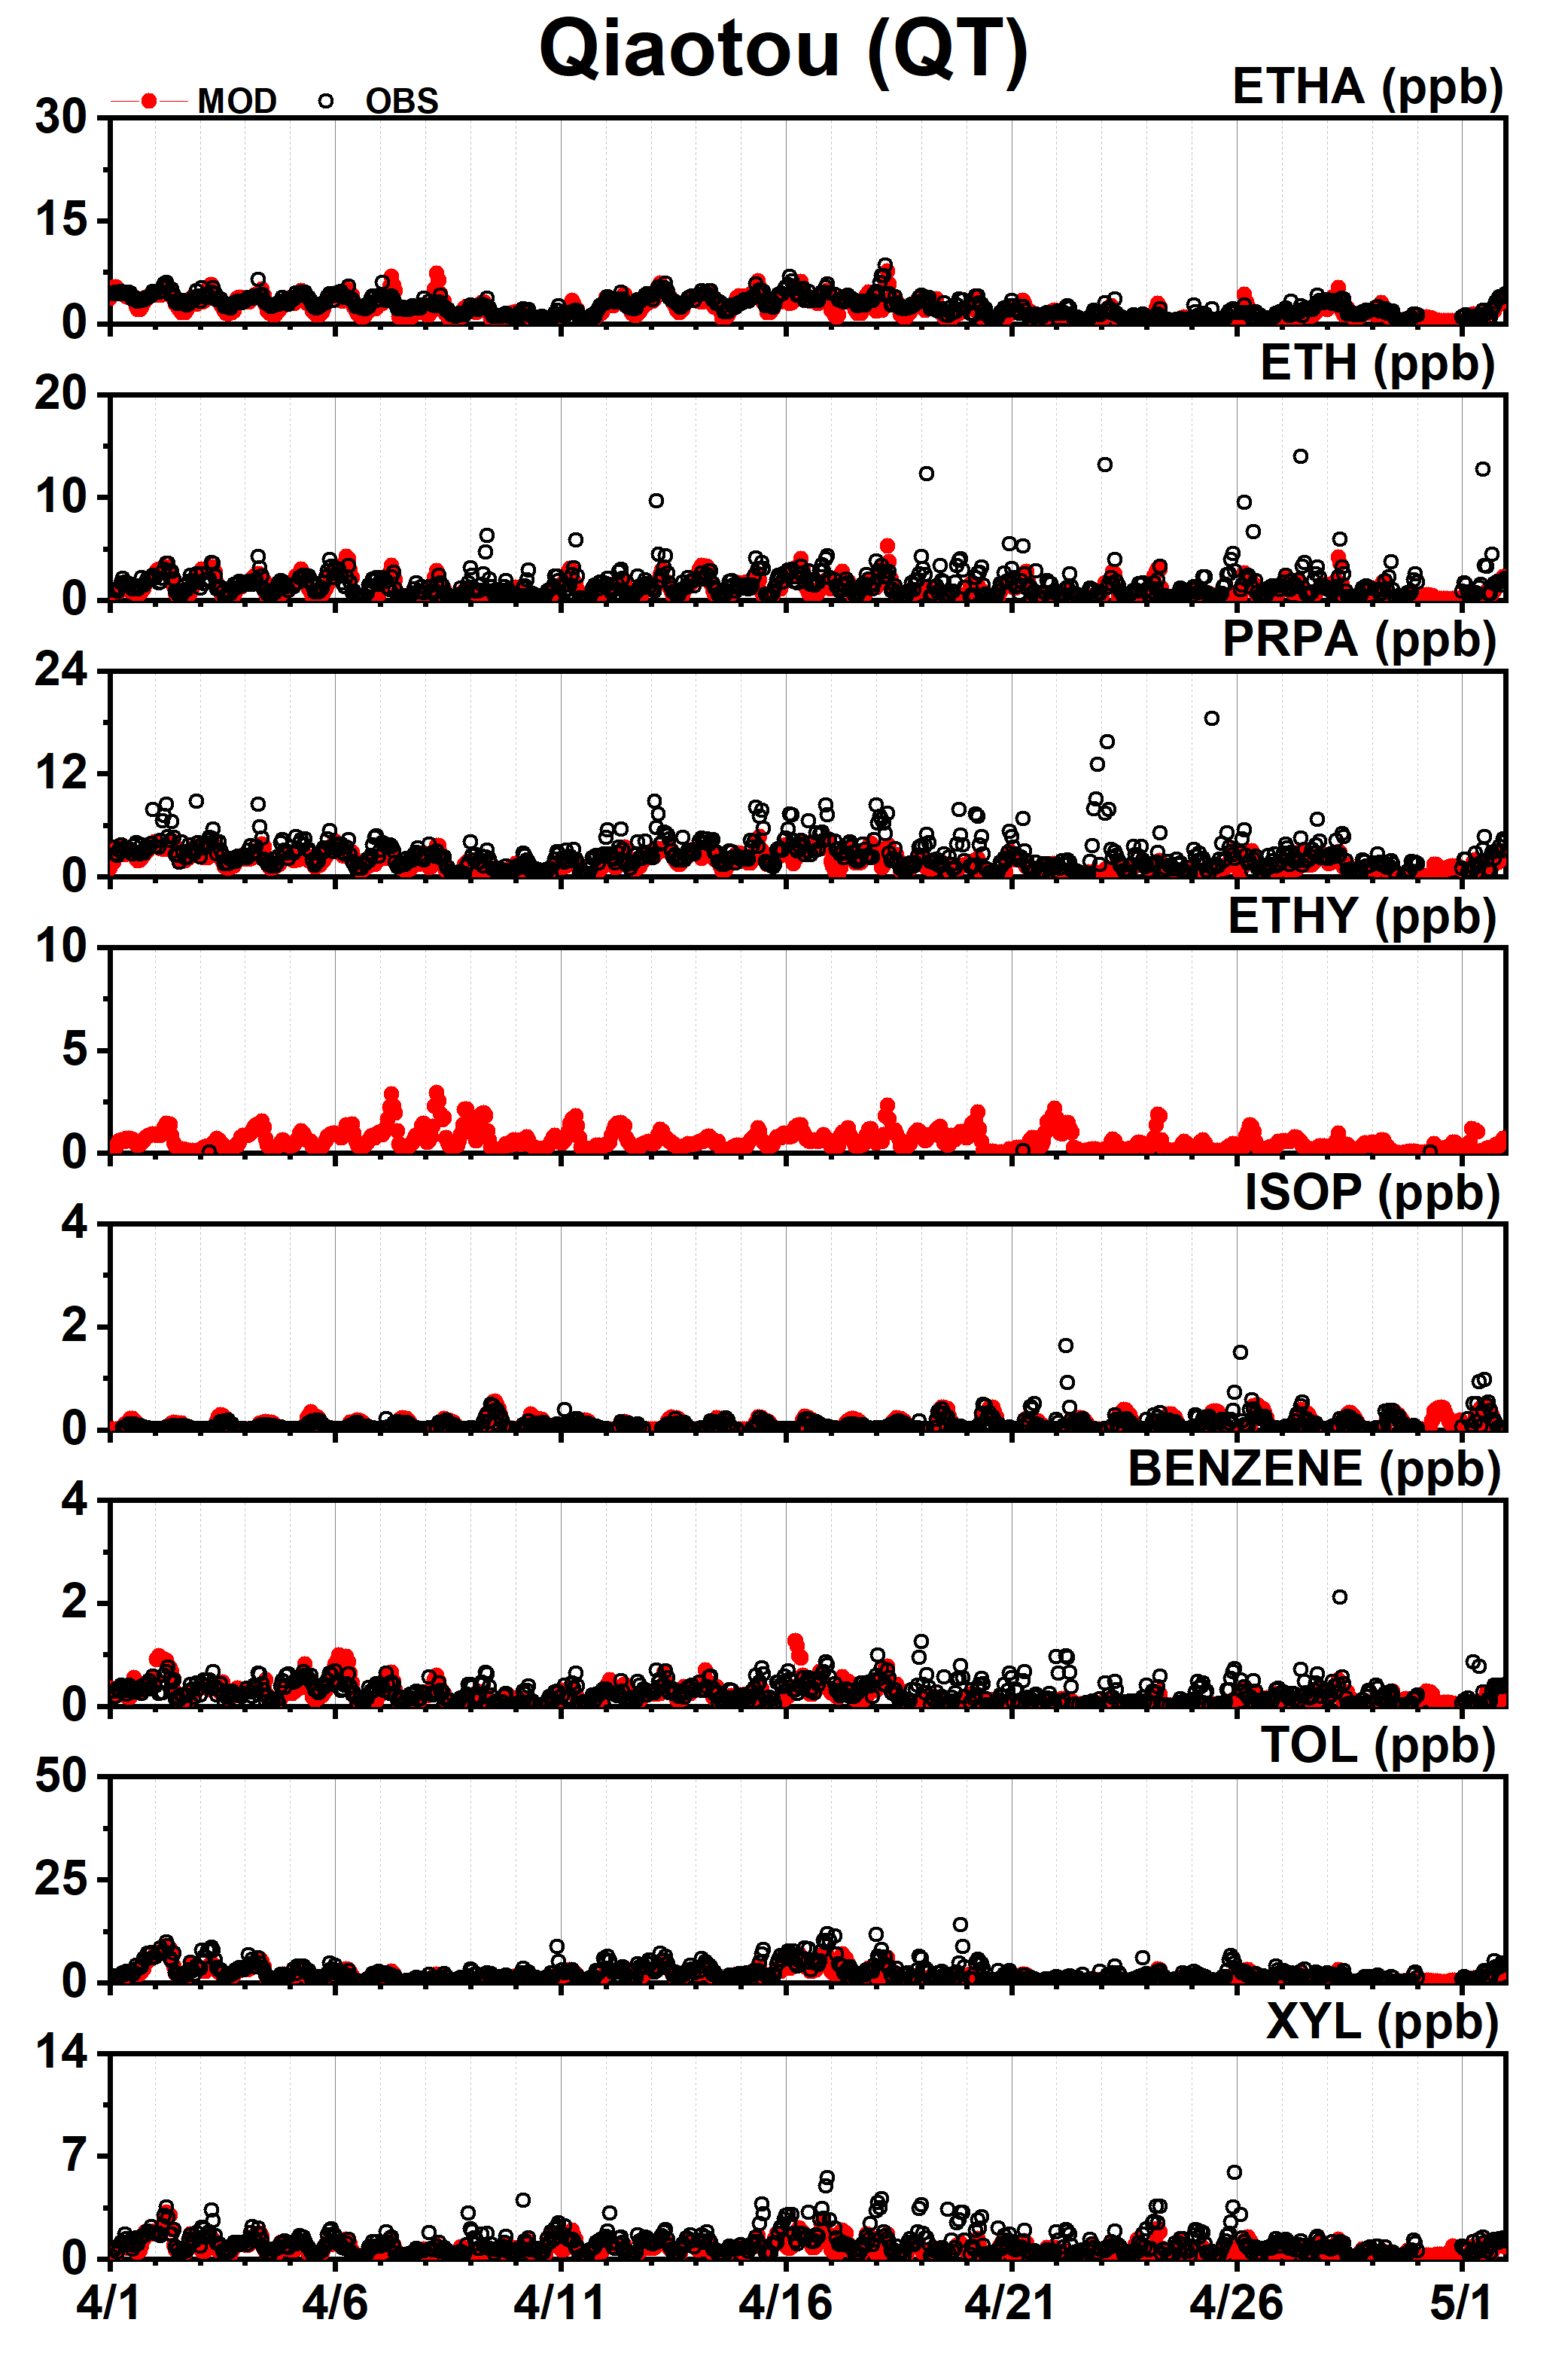


Fig. S8-9 The time series of modeled and observed VOCs at Qiaotou (QT) station in domain4.
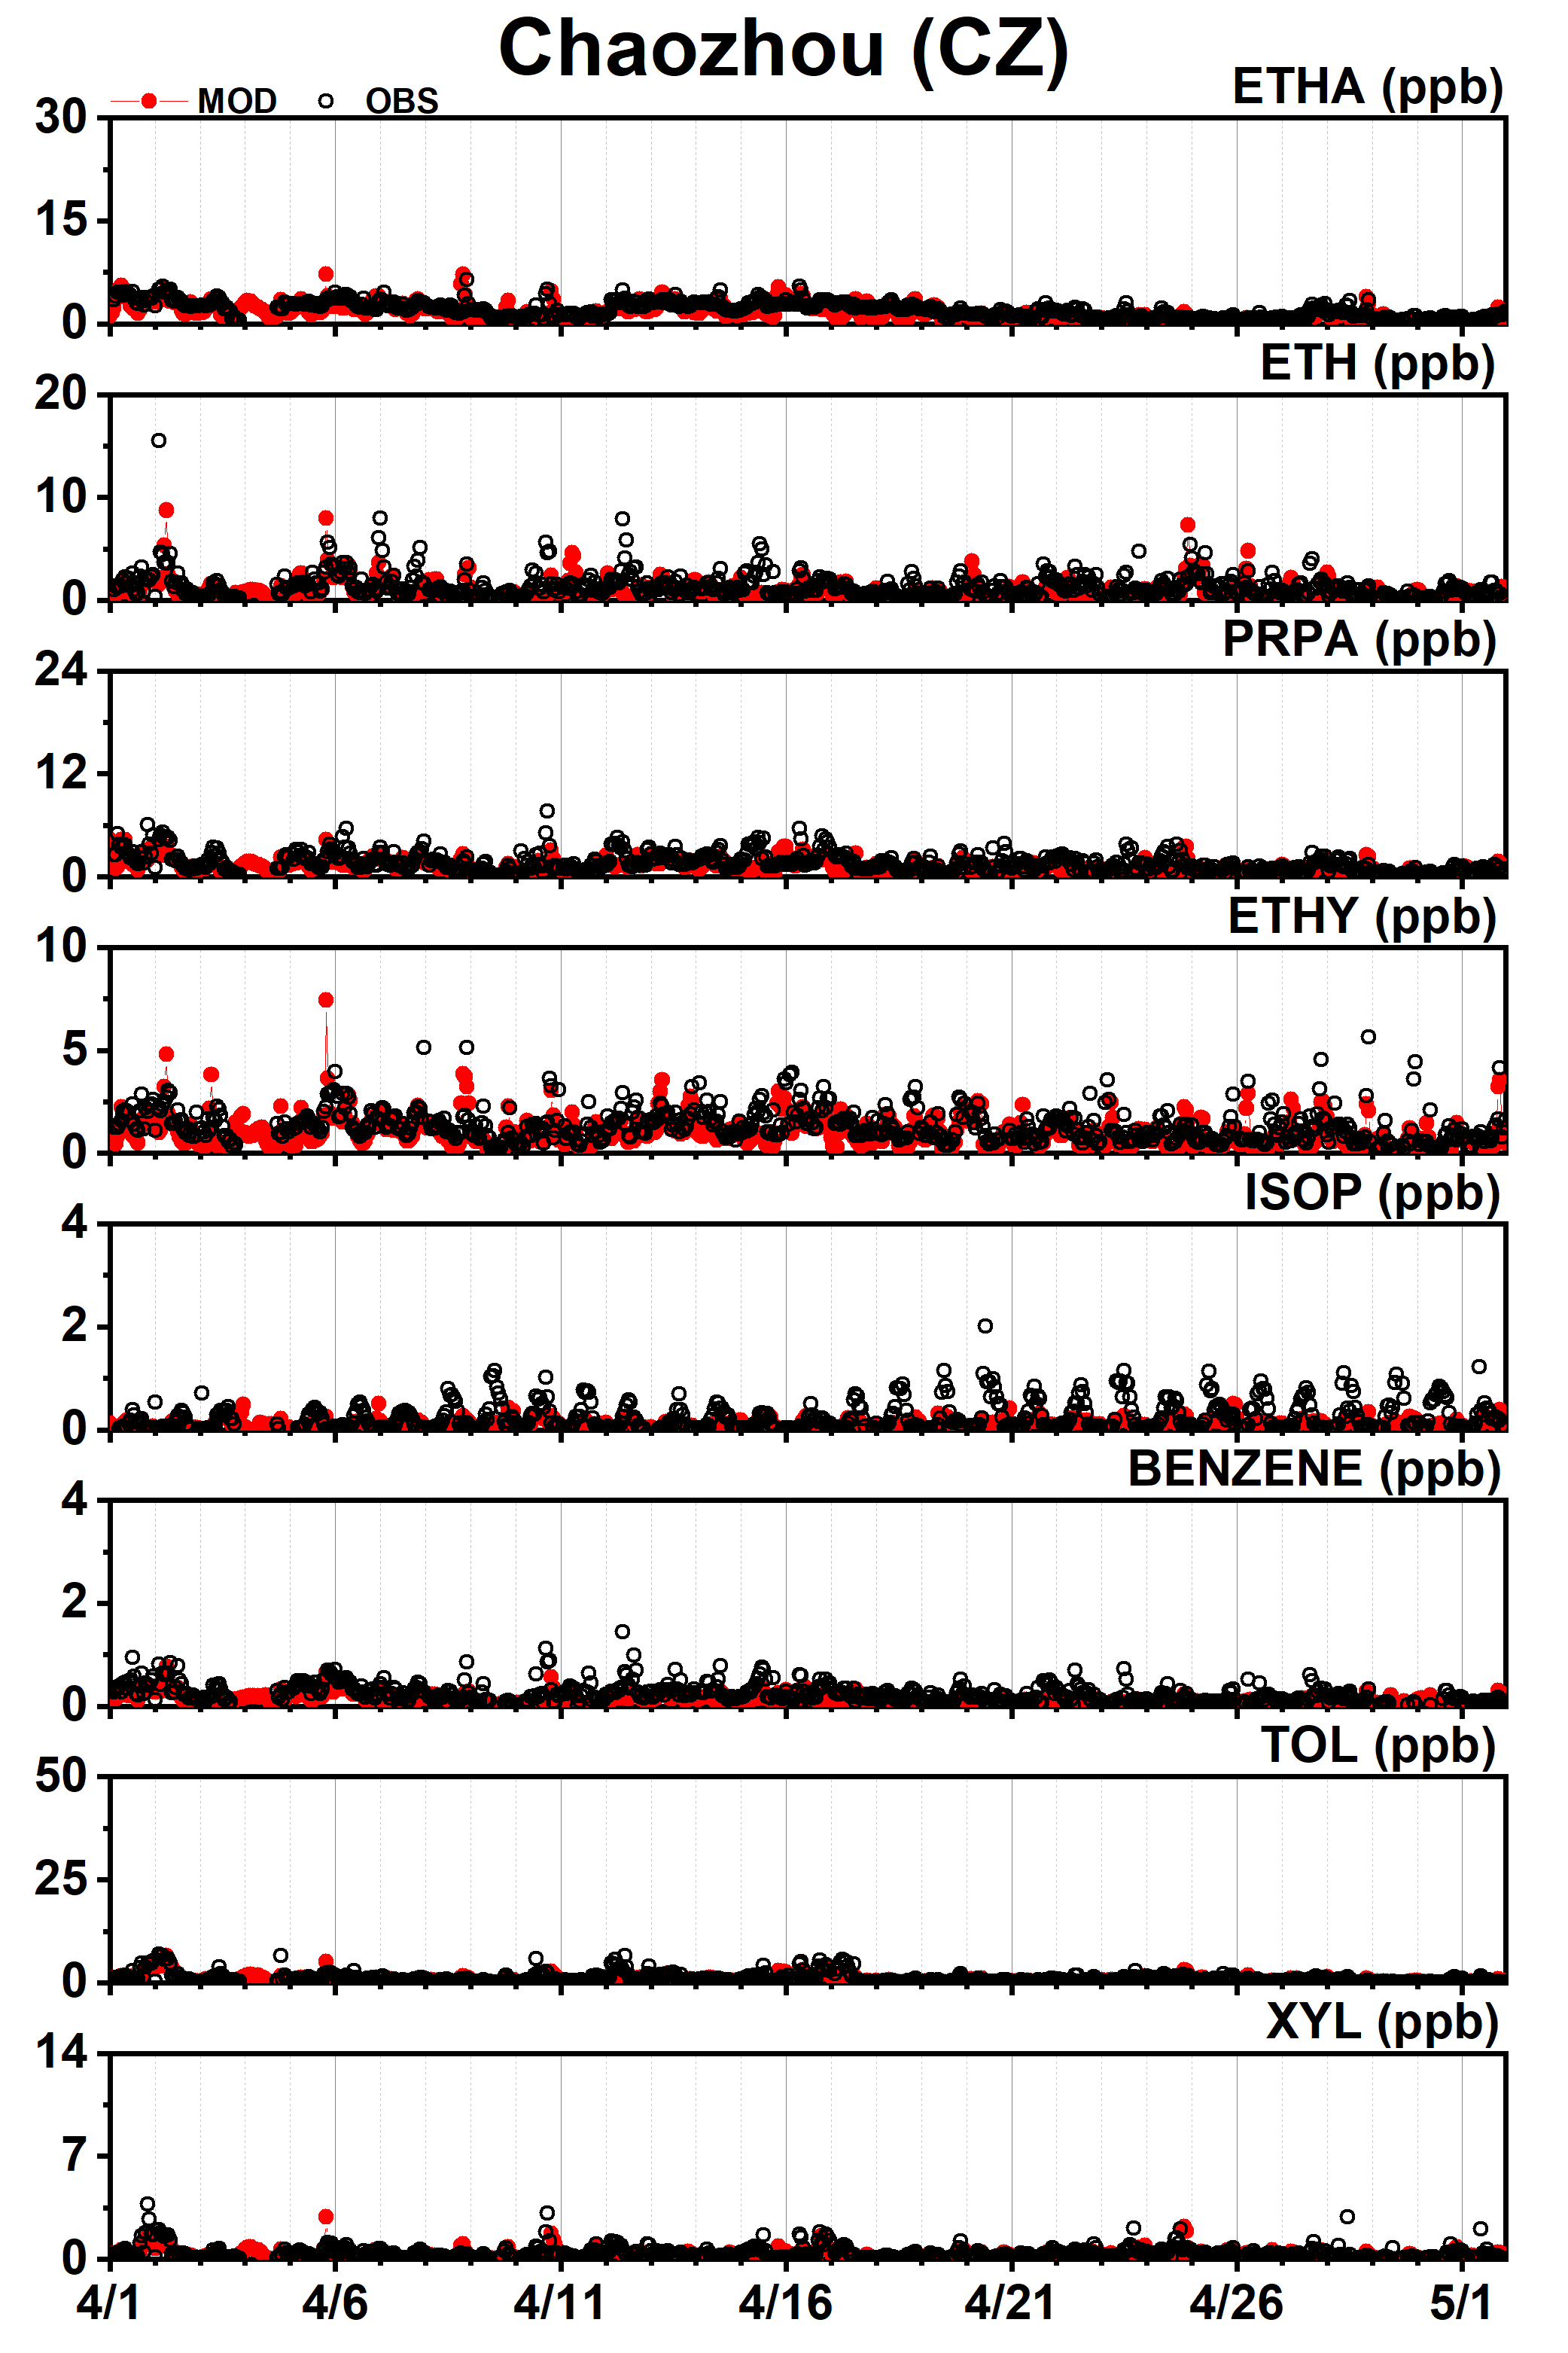


Fig. S8-11 The time series of modeled and observed VOCs at Chaozhou (CZ) station in domain4.


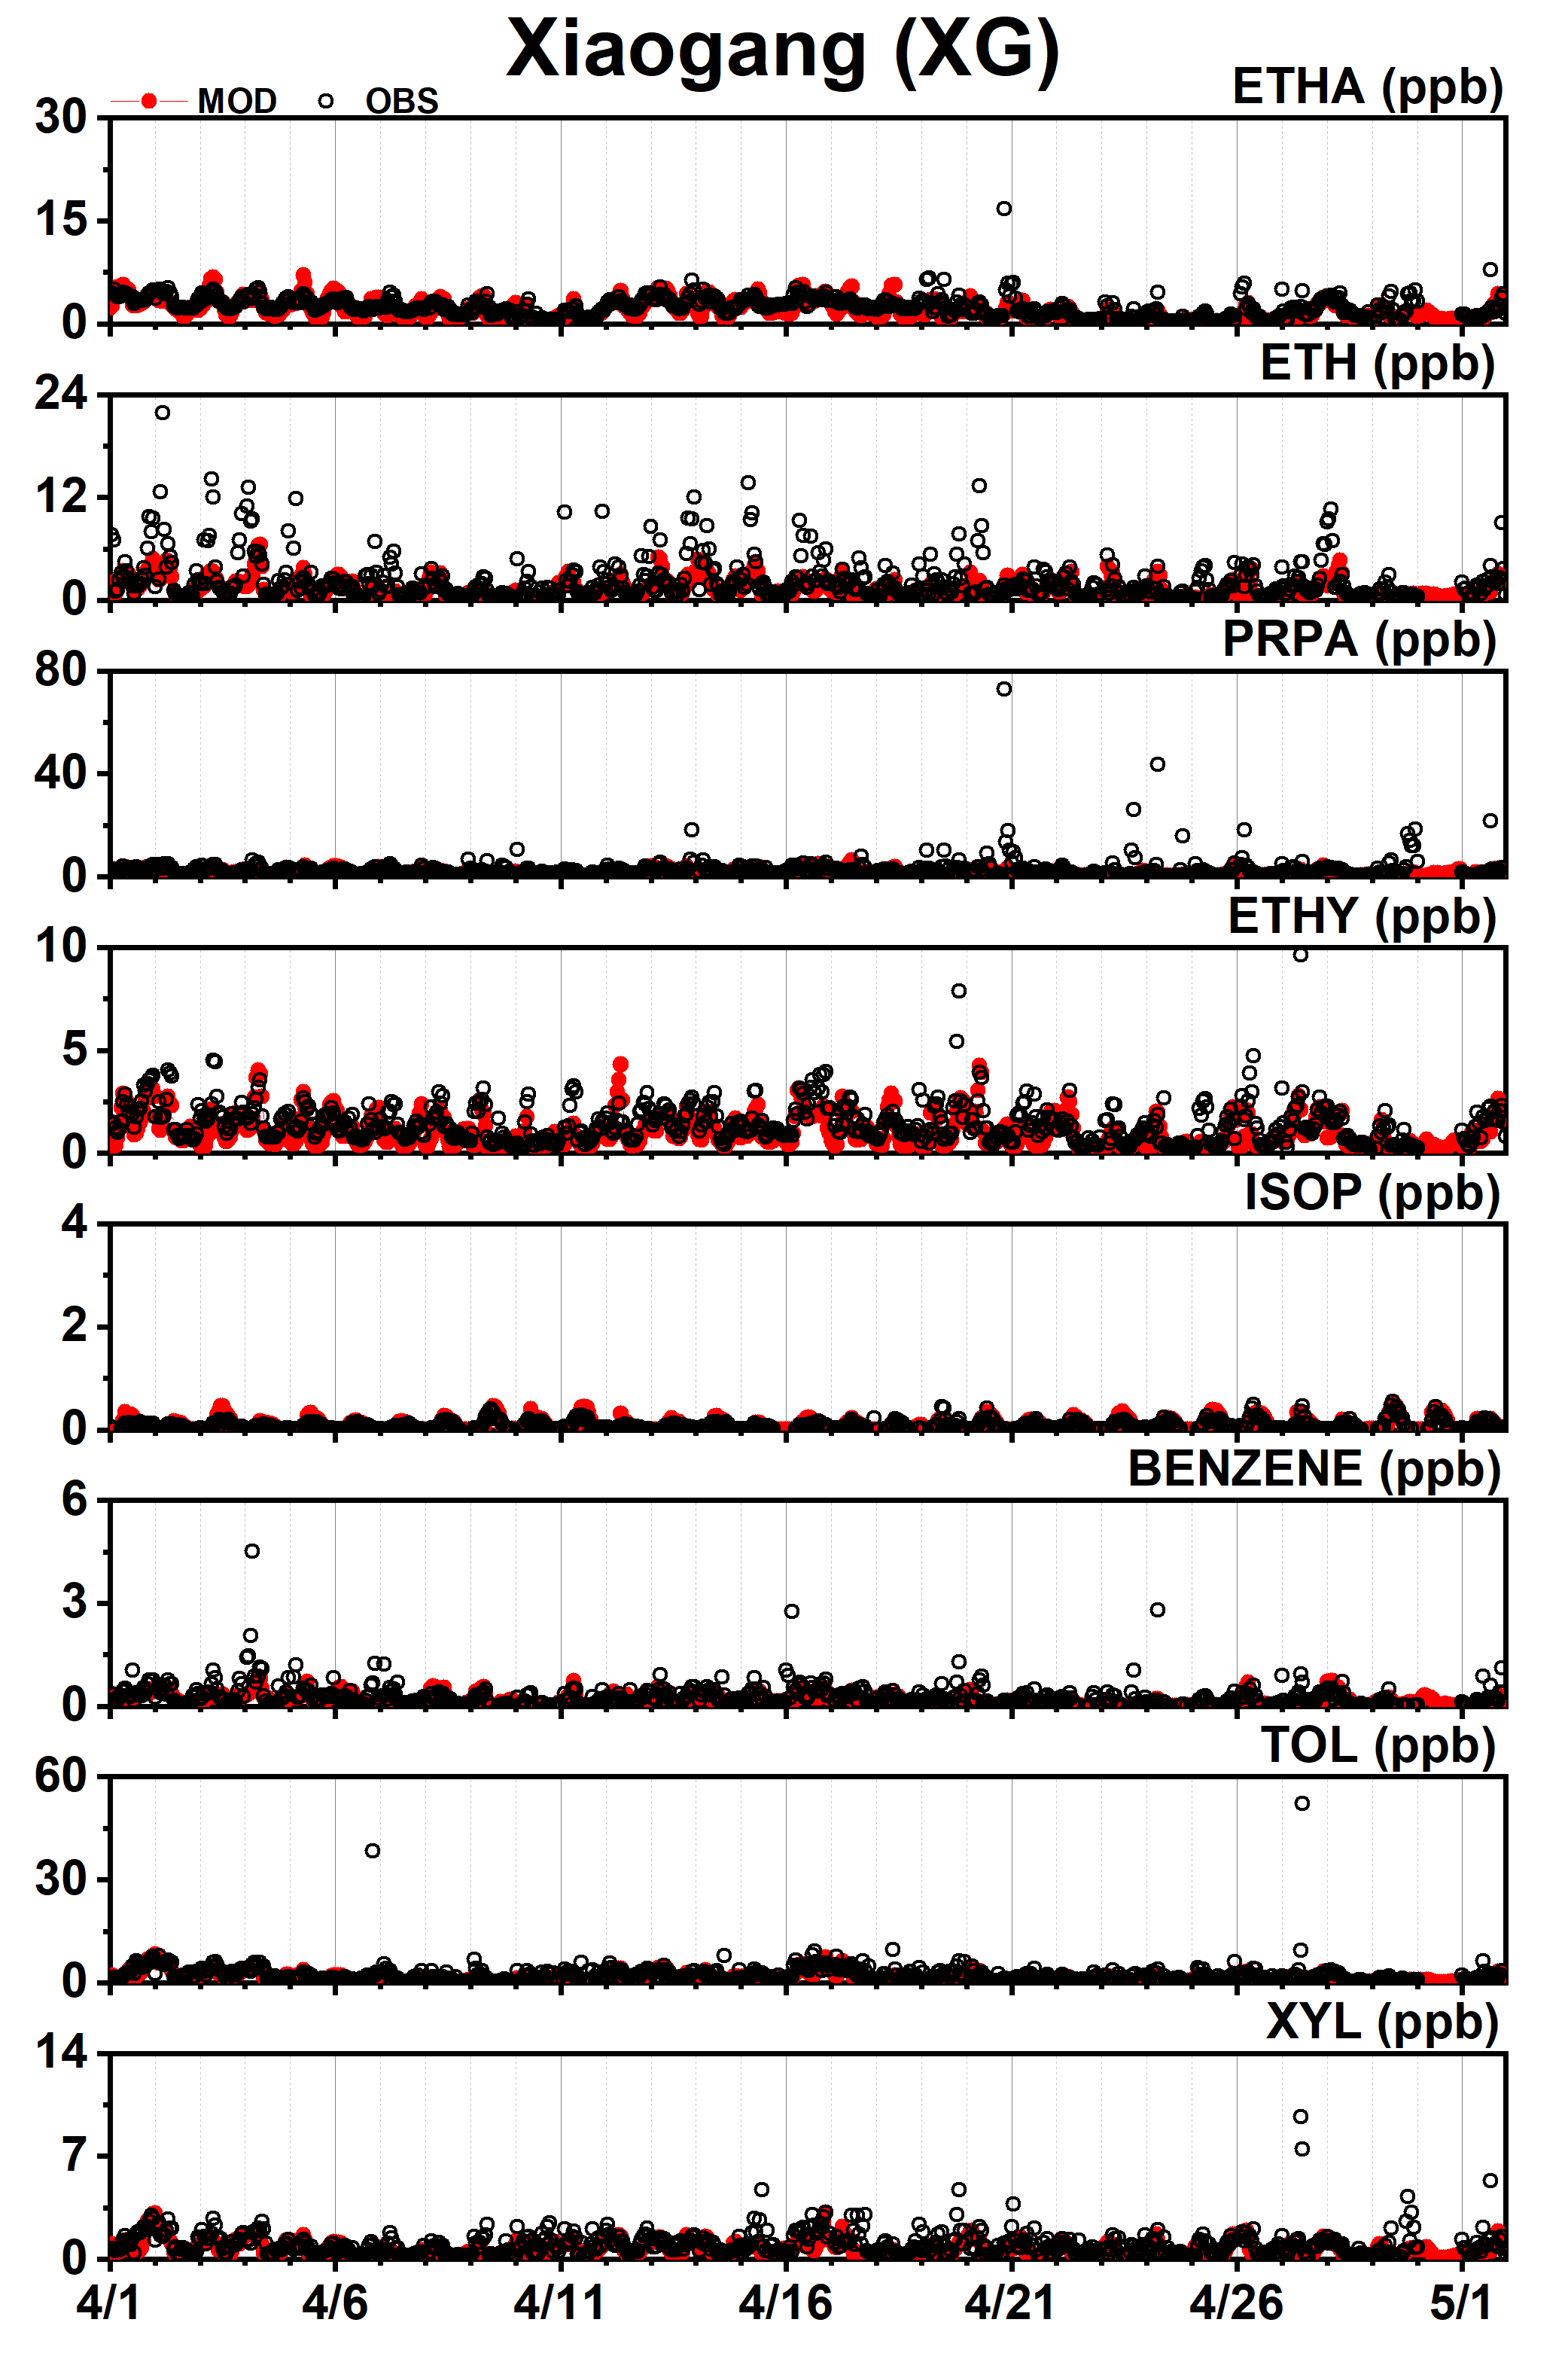


Fig. S8-10 The time series of modeled and observed VOCs at Xiaogang (XG) station in domain4.
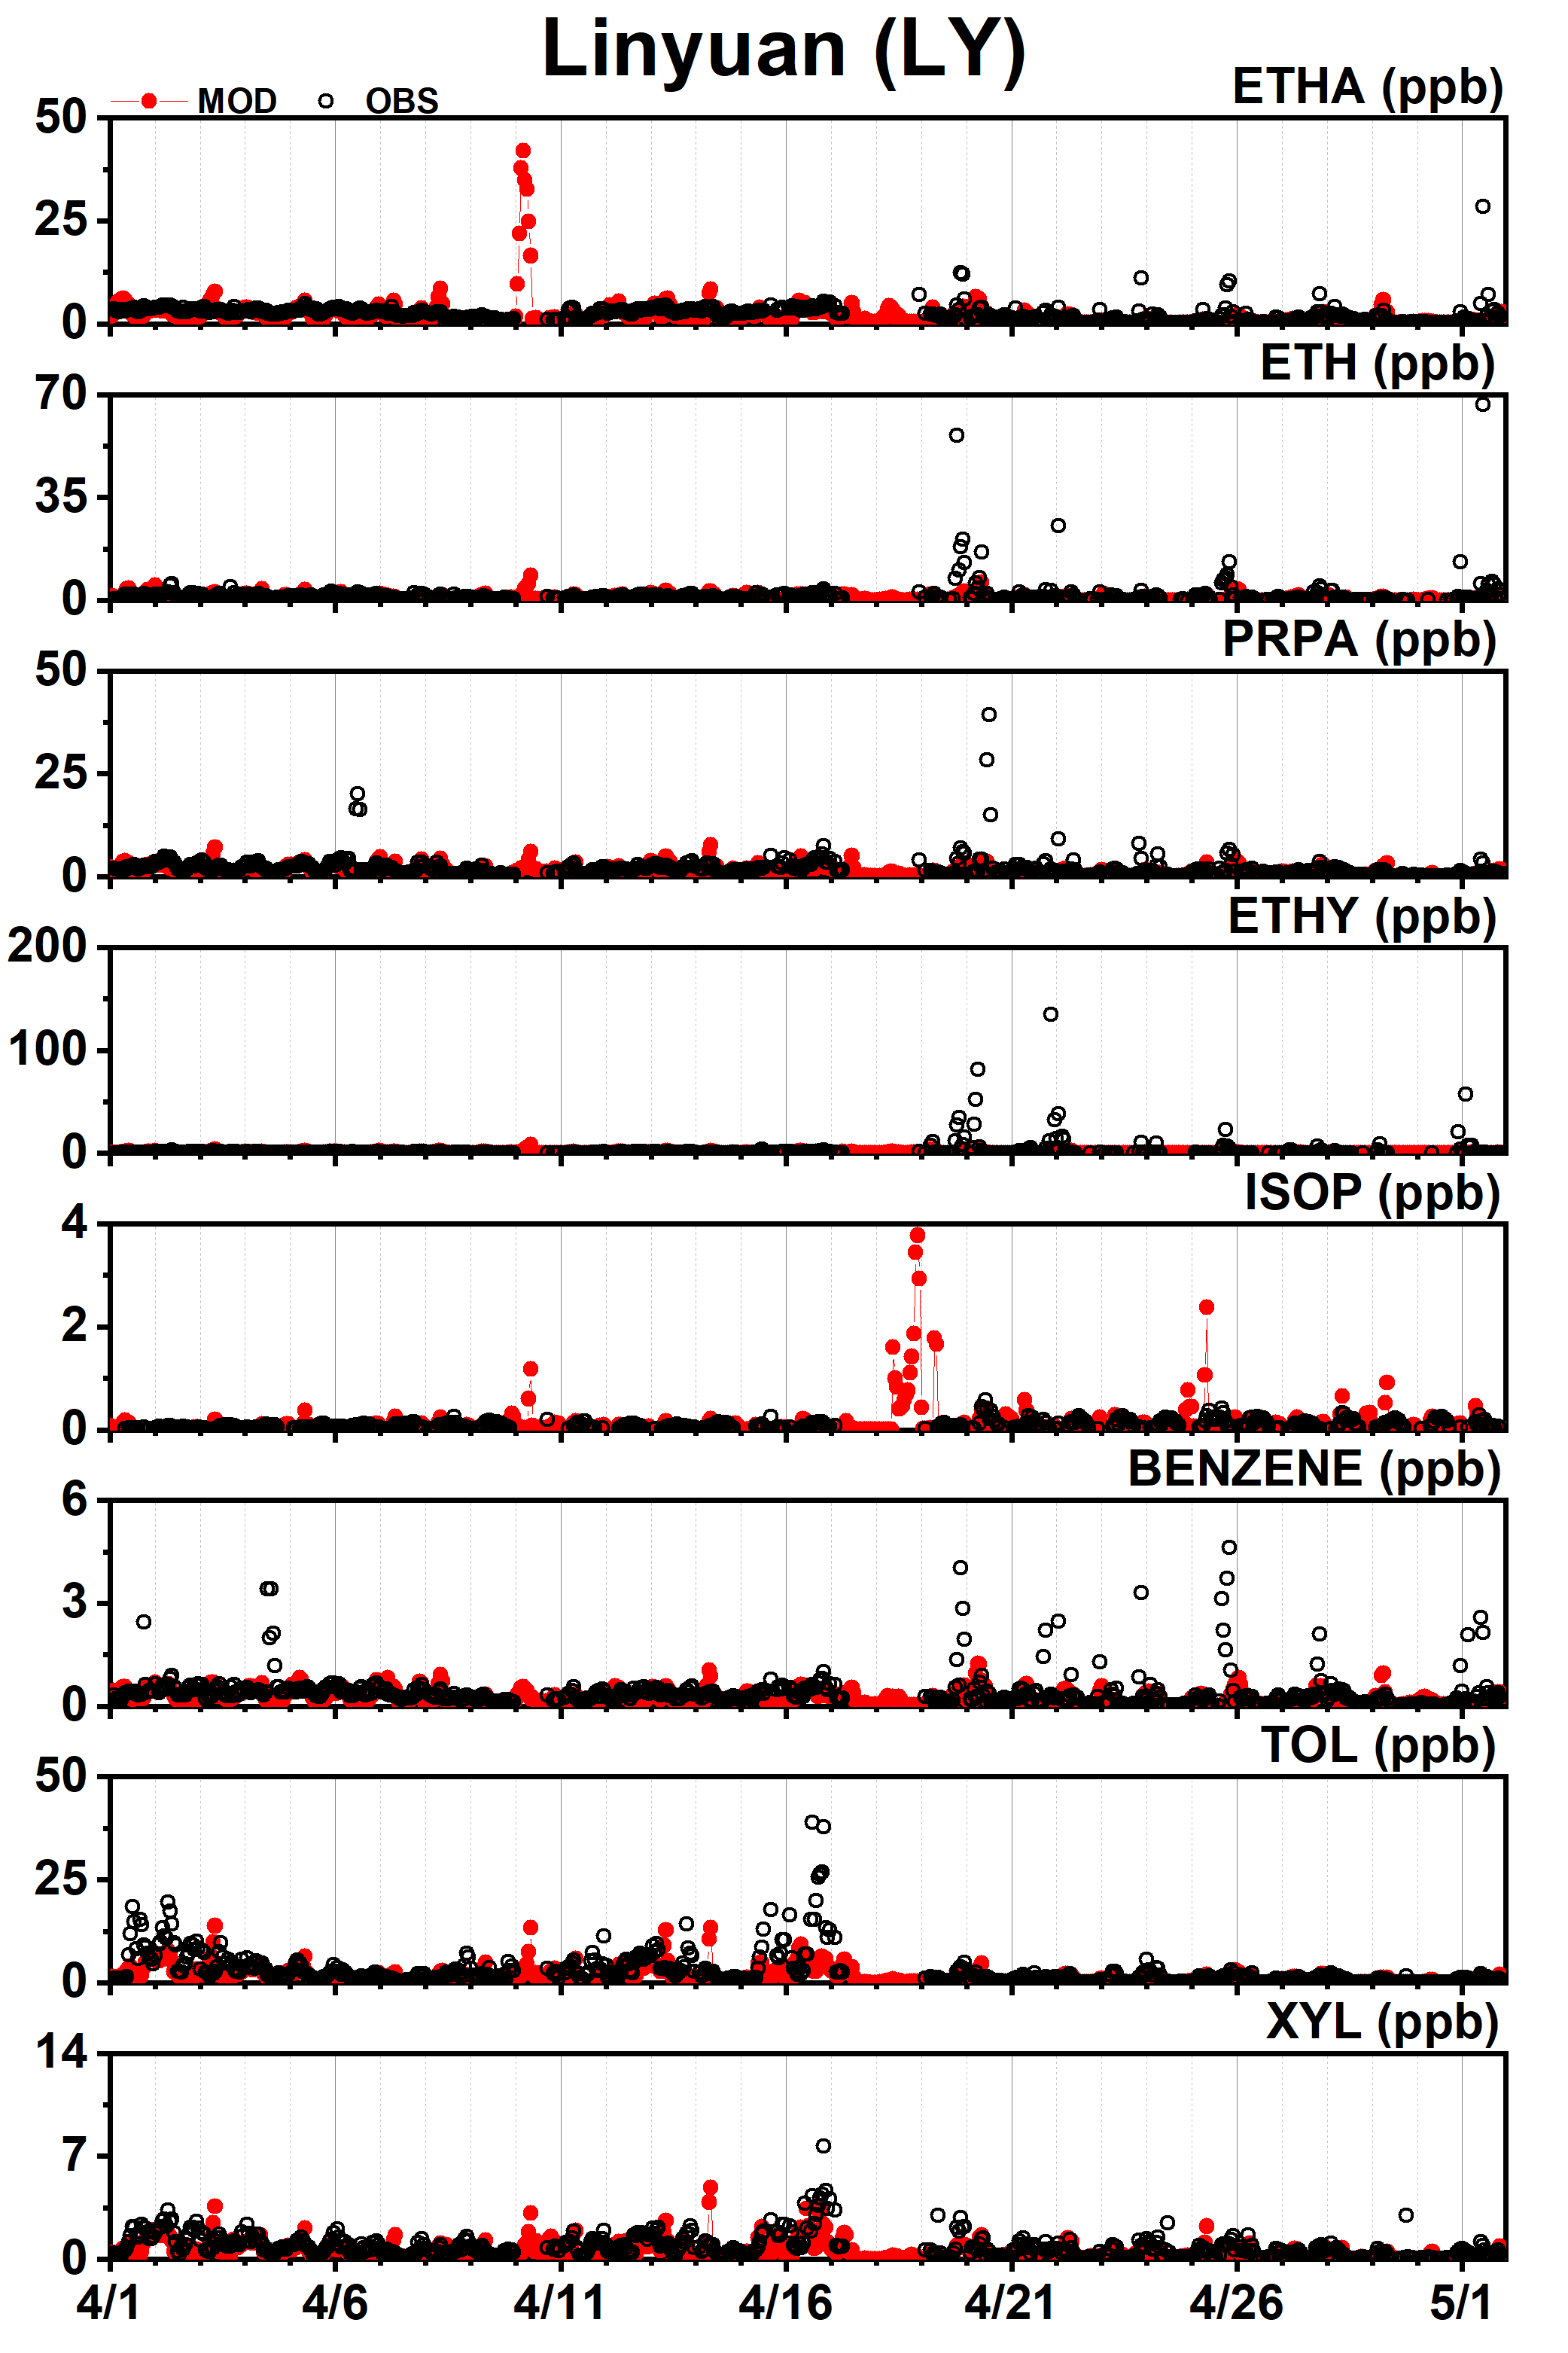


Fig. S8-12 The time series of modeled and observed VOCs at Linyuan (LY) station in domain4.


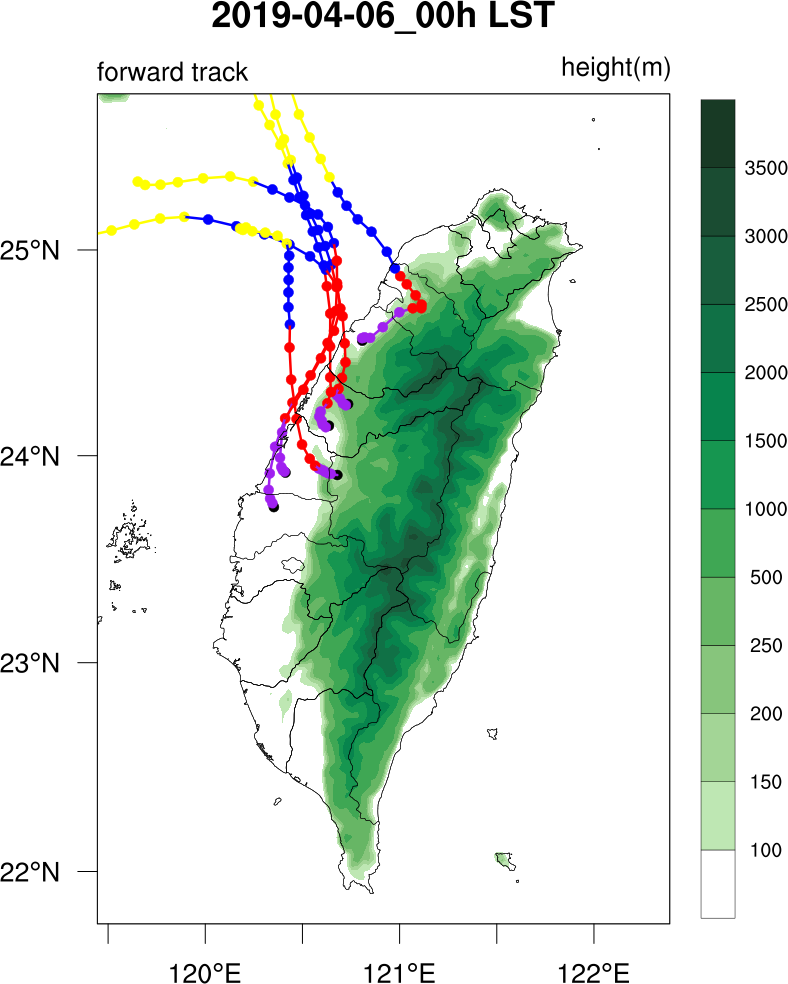

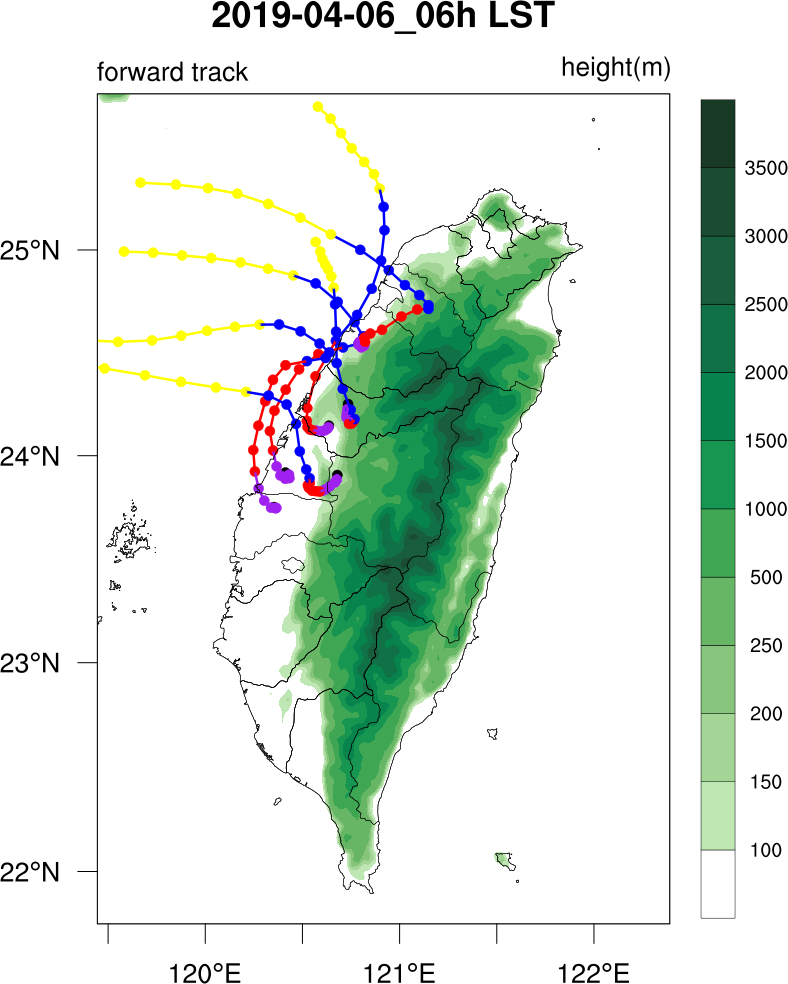

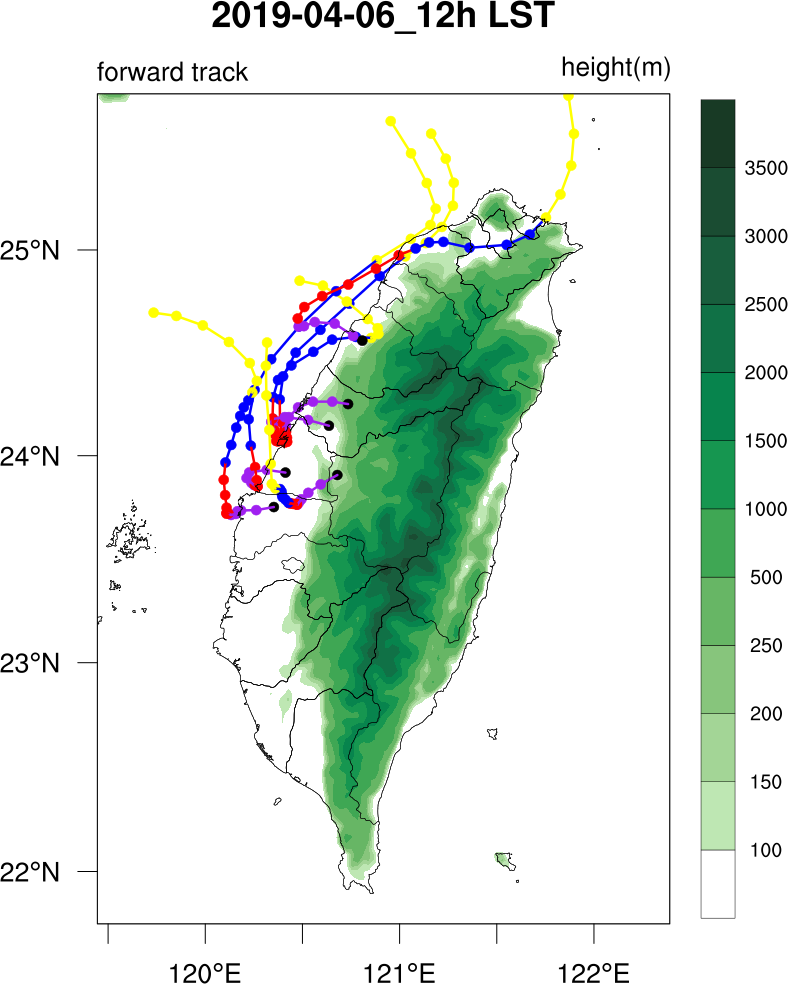

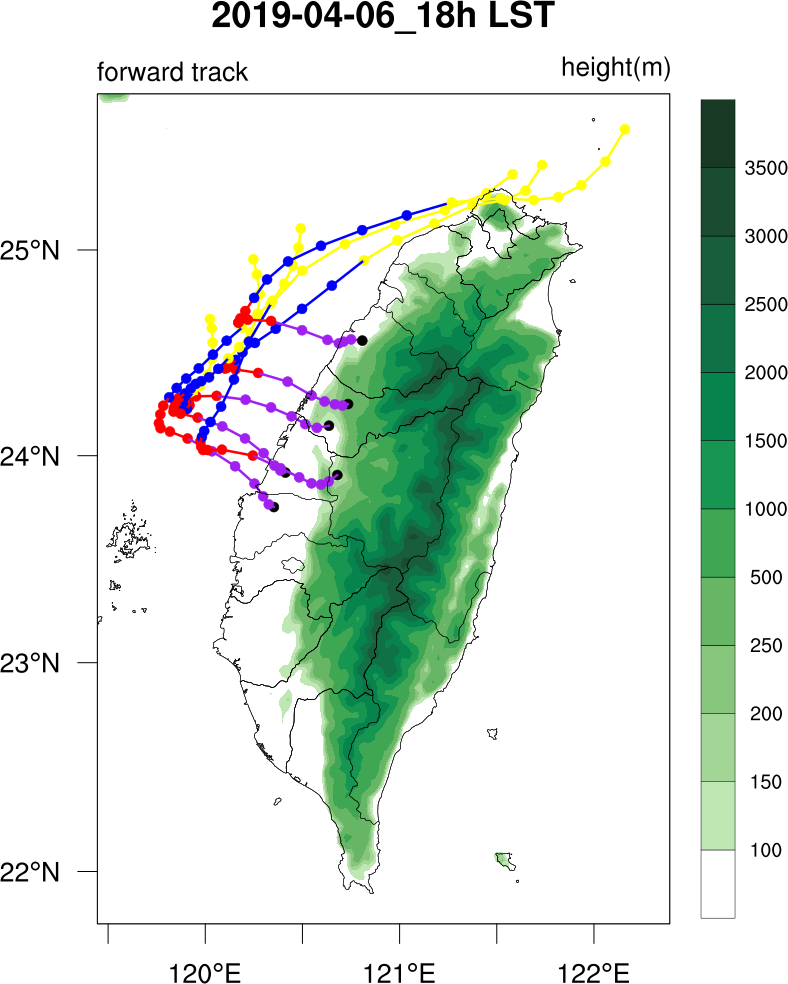

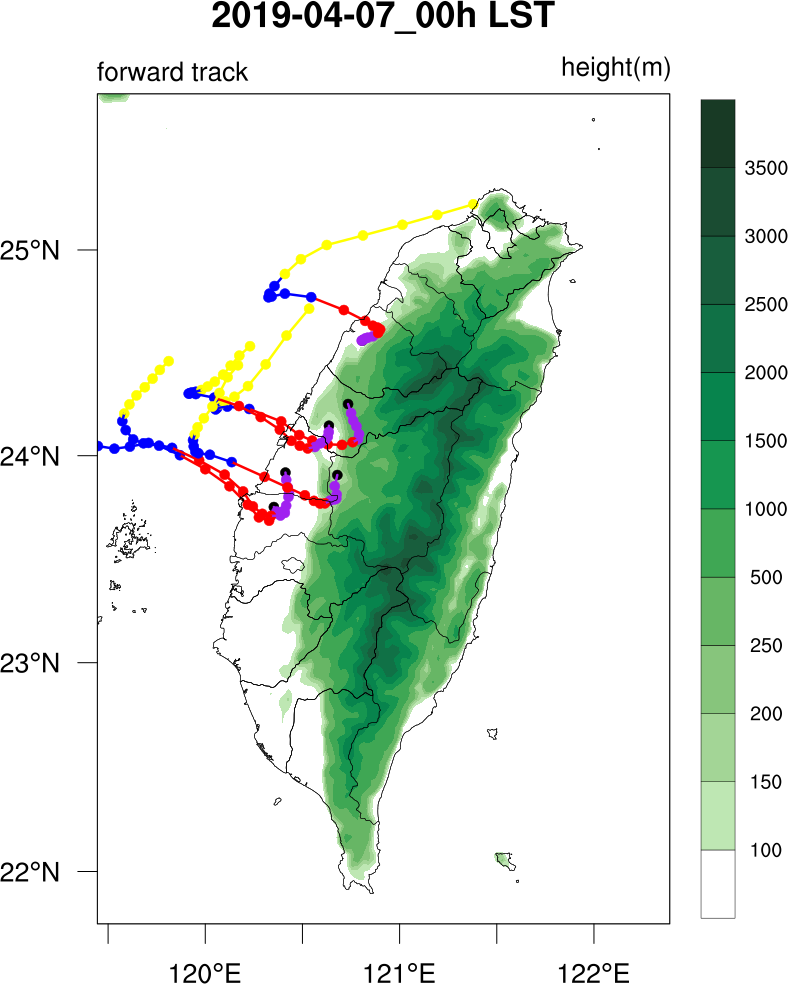

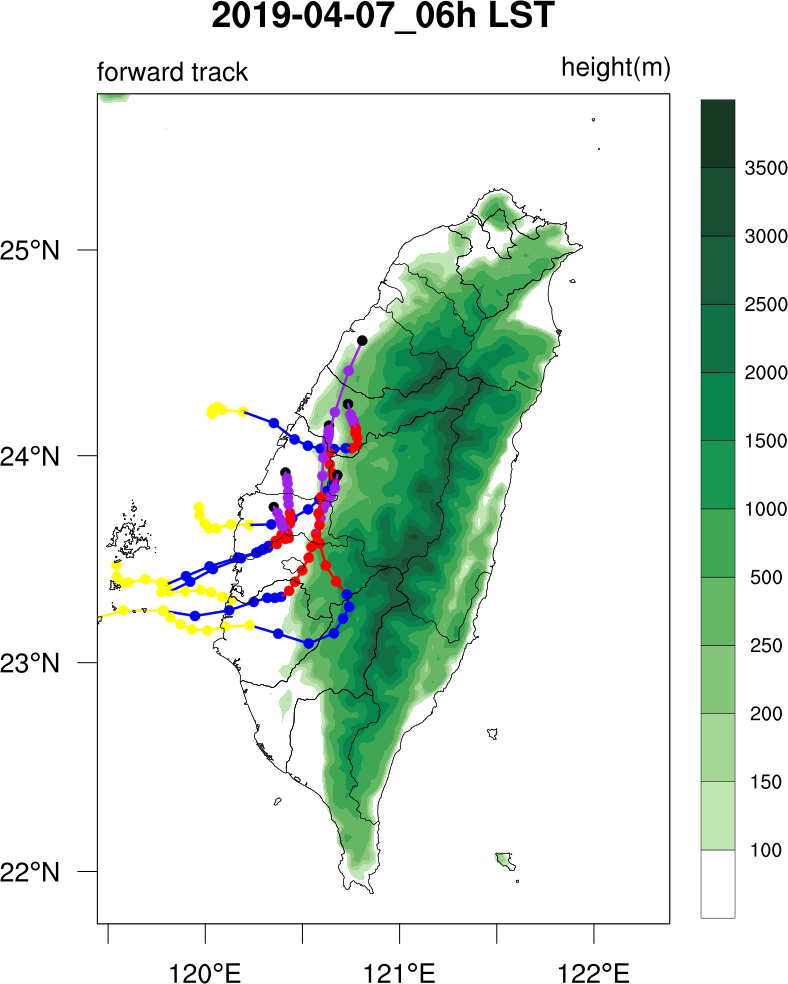

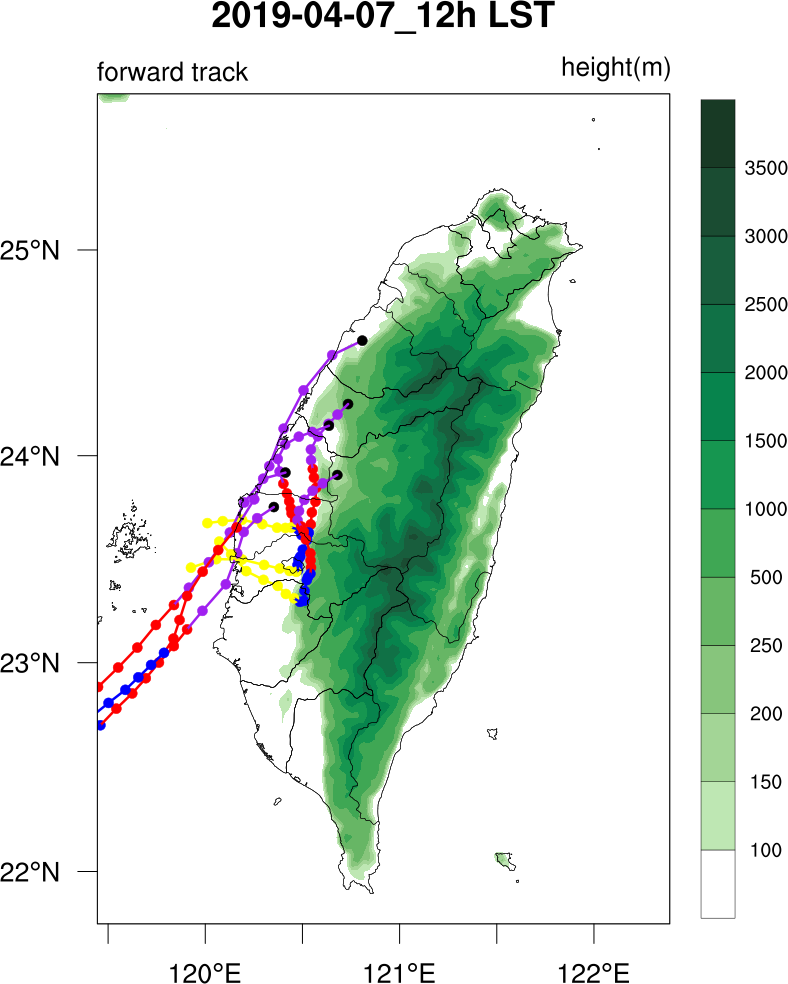

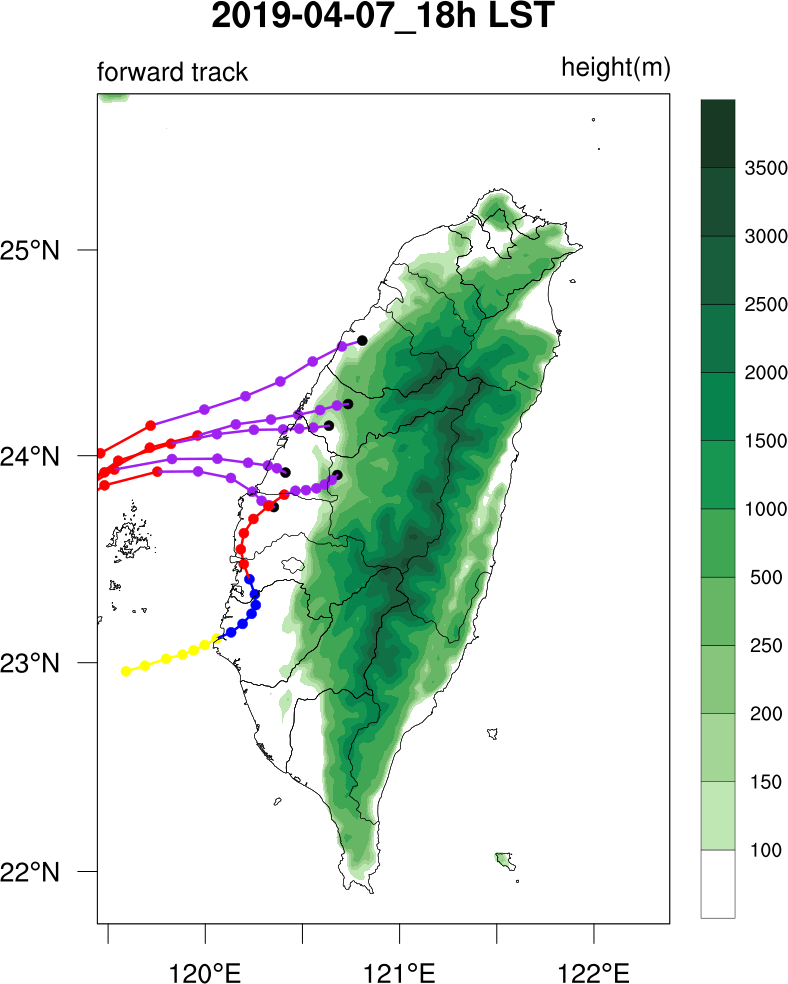

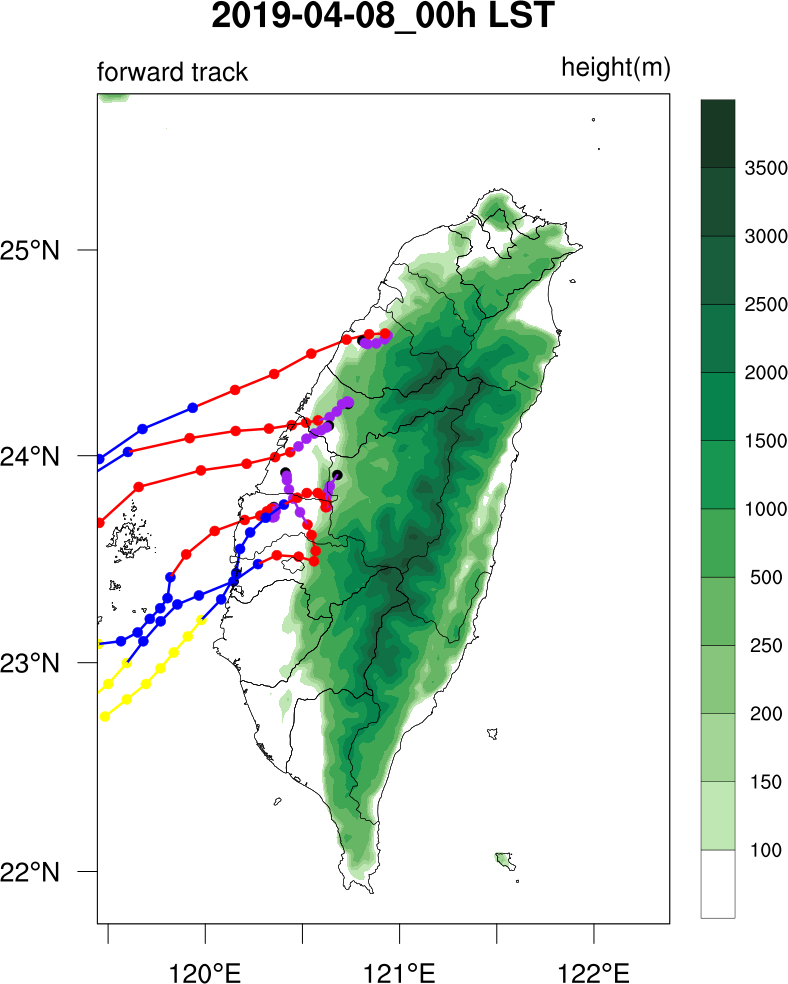

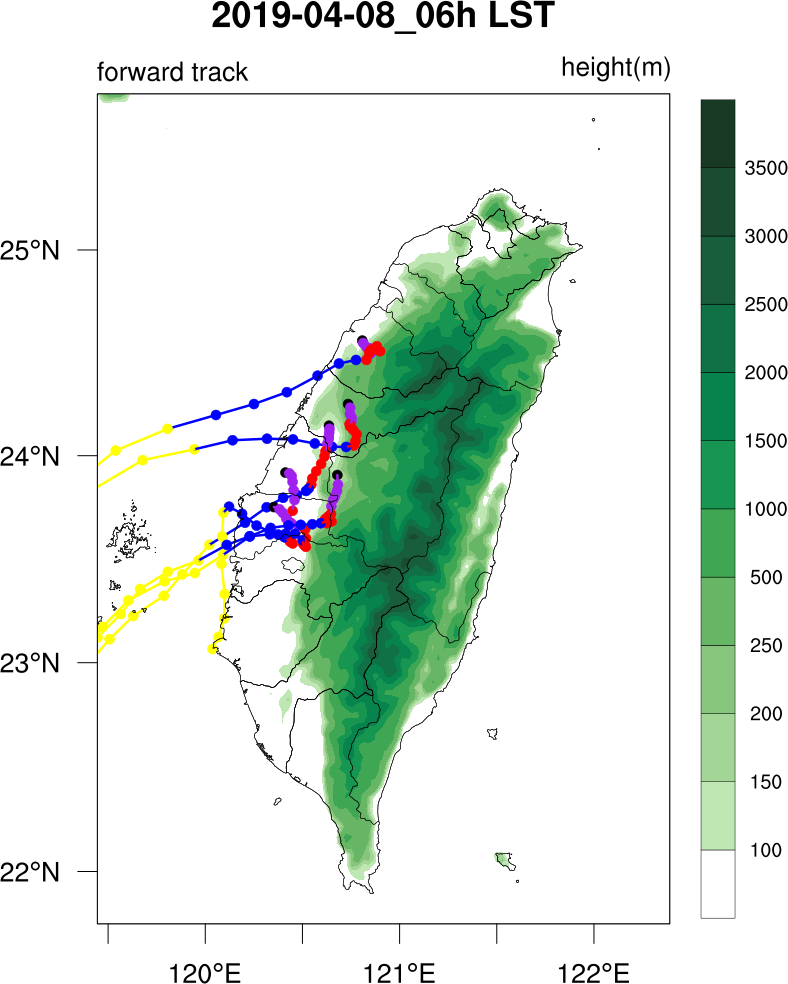

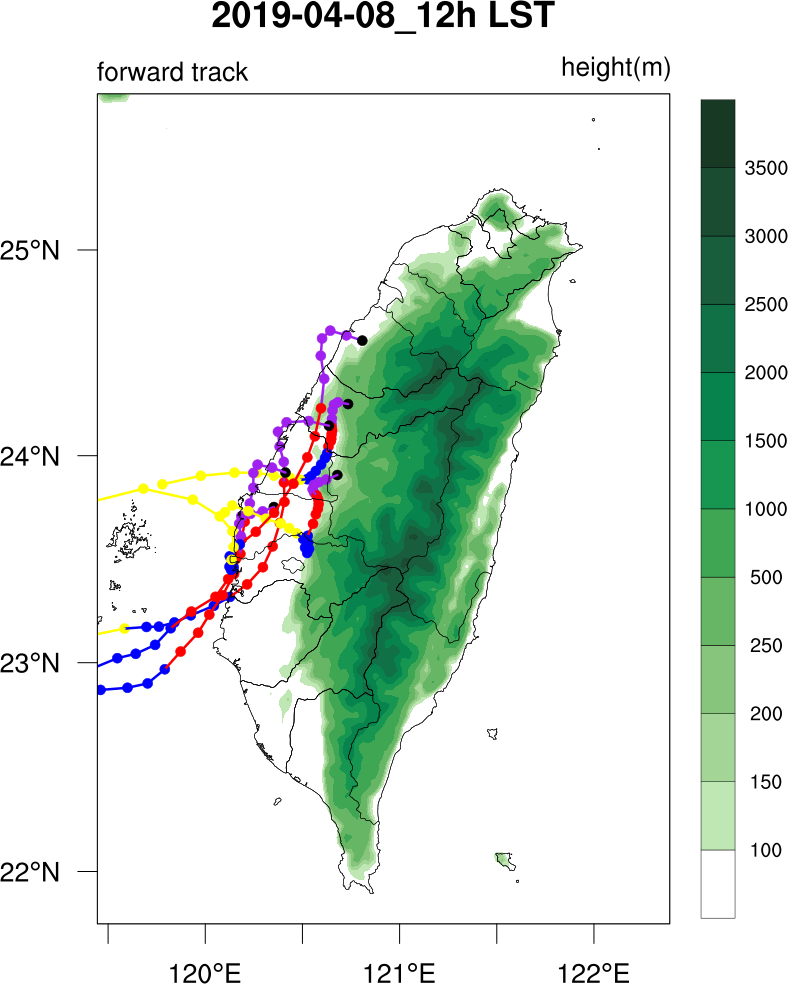

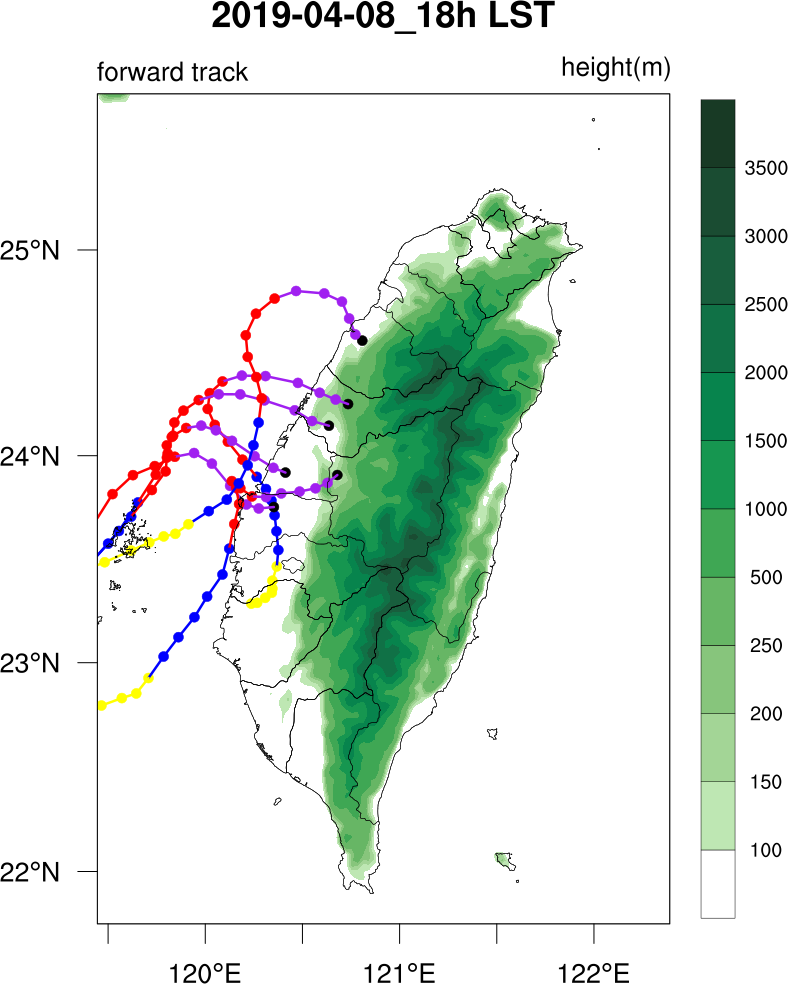

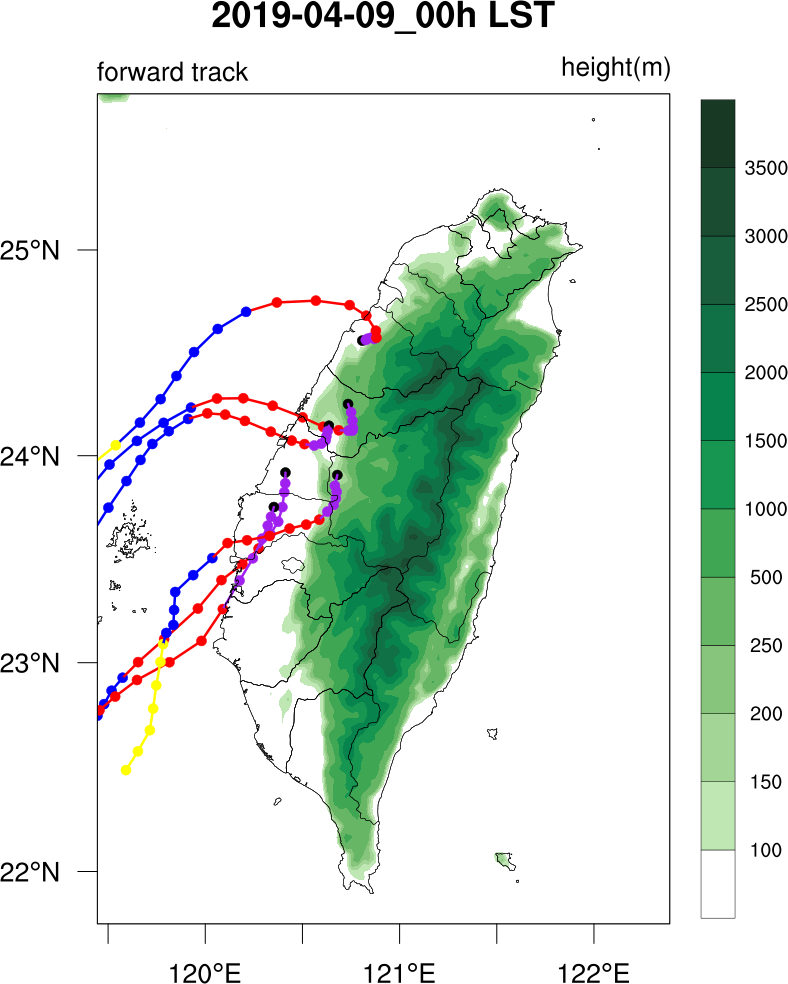

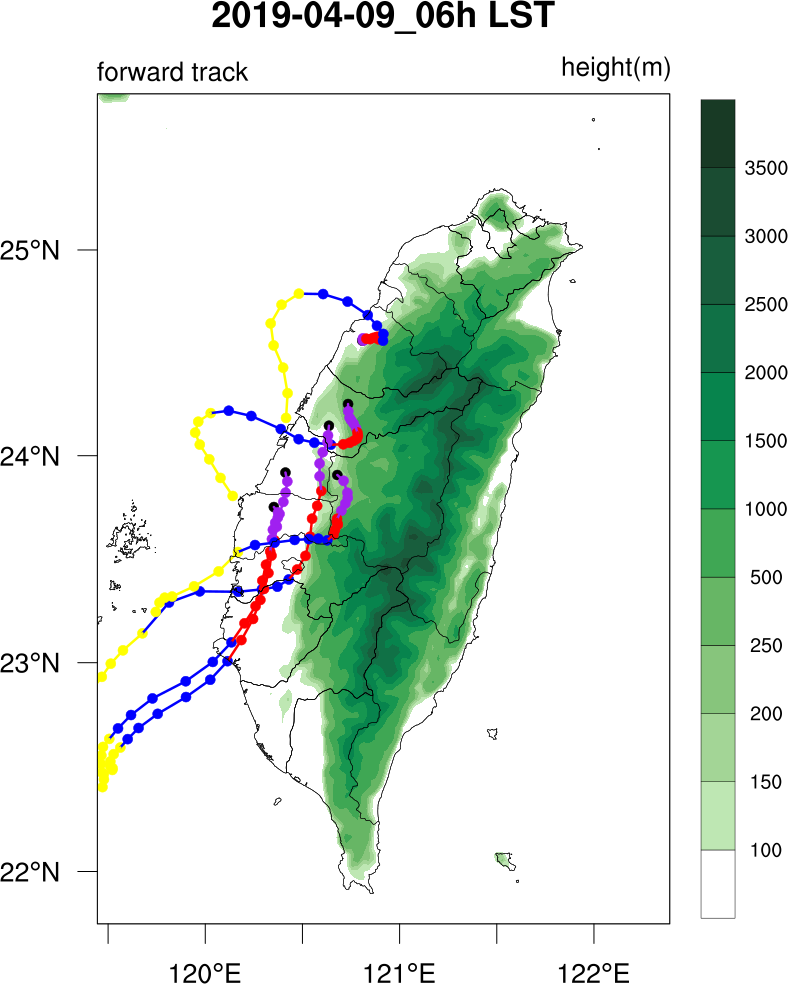

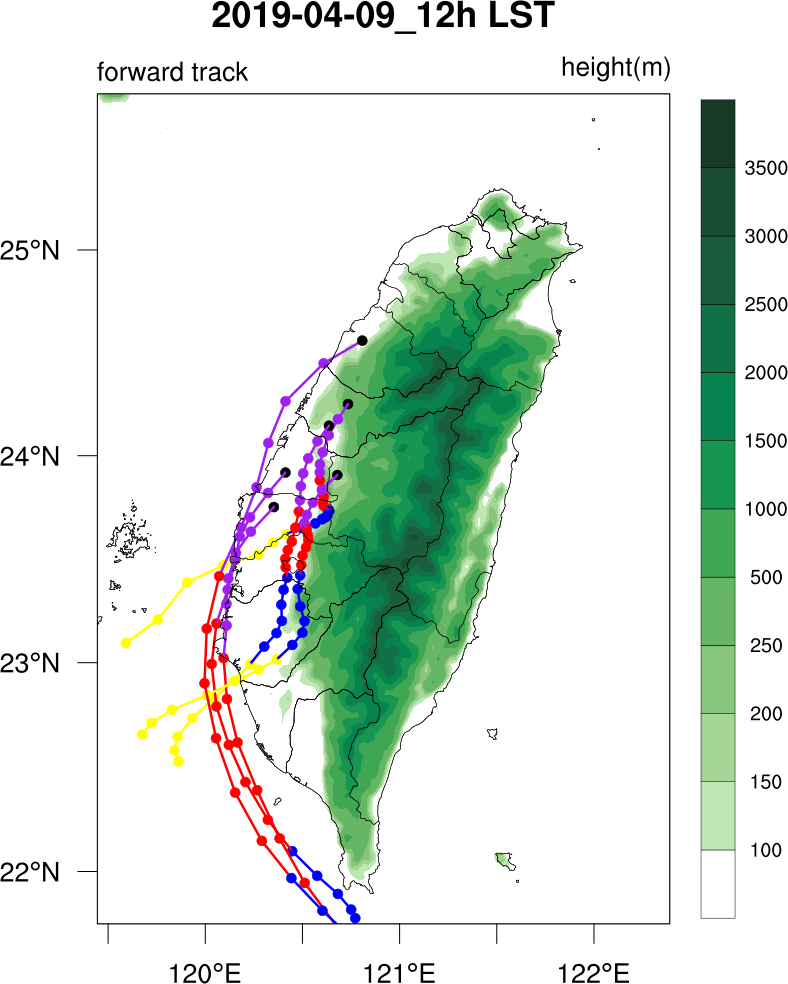

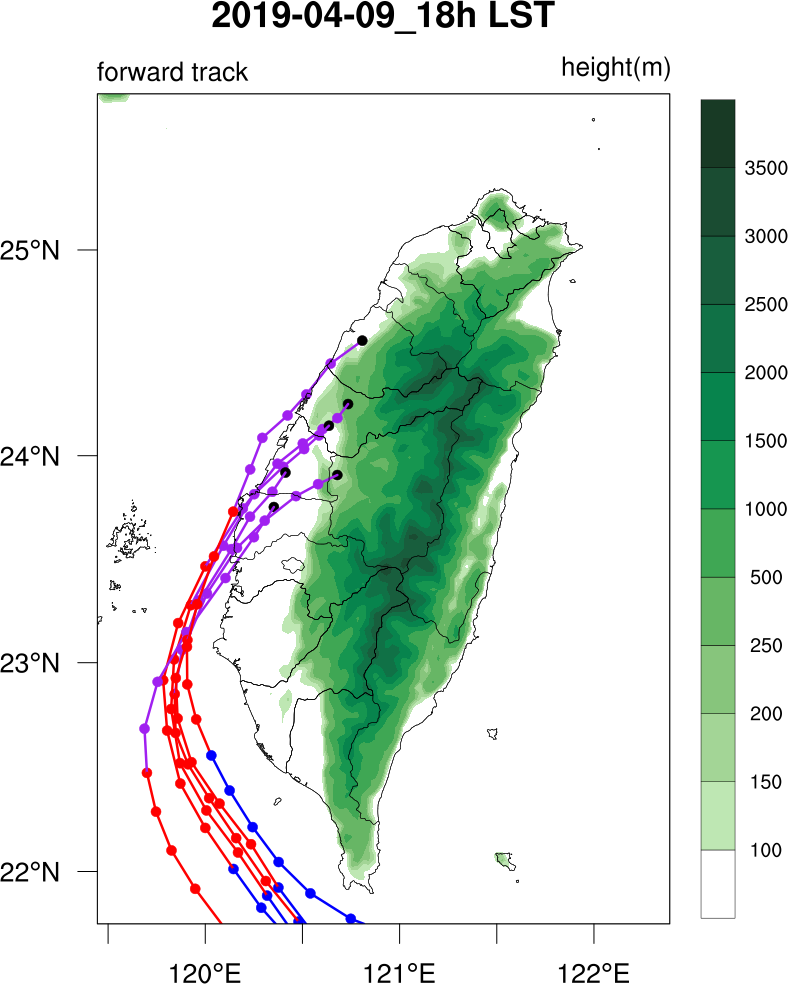


**(p)**

**(j)**

**(g)**

**(i)**

**(k)**

**(l)**

**(m)**

**(n)**

**(o)**

**(e)**

**(f)**

**(h)**

**(a)**

**(b)**

**(c)**

**(d)**

Fig. S9. Backward trajectories from Miaoli, Fengyuan, Zhongming, Erlin, Lunbei, and Nantou Stations every six hours from April 6 to April 9, 2019, starting at (a) 00:00 LST, (b) 06:00 LST, (c) 12:00 LST, and (d) 18:00 LST on April 6, 2019; (e) 00:00 LST, (f) 06:00 LST, (g) 12:00 LST, and (h) 18:00 LST on April 7, 2019; (i) 00:00 LST, (j) 06:00 LST, (k) 12:00 LST, and (l) 18:00 LST on April 8, 2019; and (m) 00:00 LST, (n) 06:00 LST, (o) 12:00 LST, and (p) 18:00 LST on April 9, 2019.

(a) Miaoli (ML) (b) Fengyuan (FY)


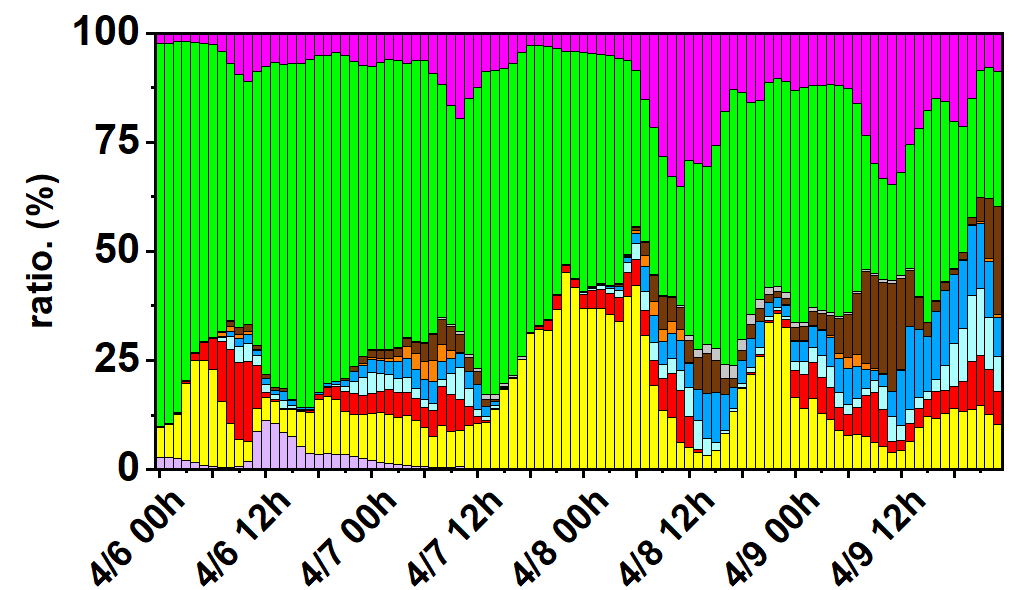

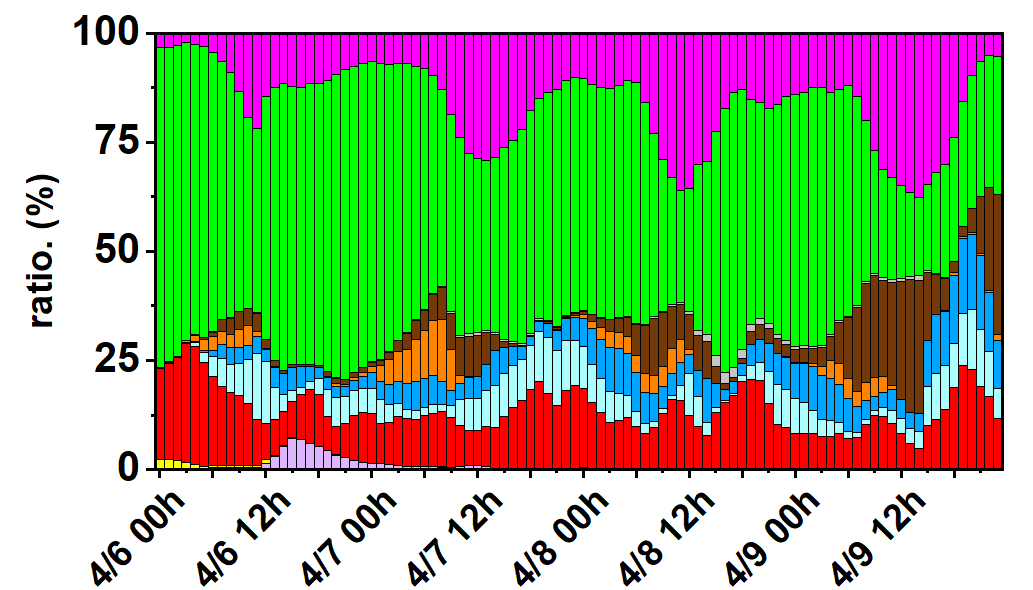


(c) Zhongming (ZM) (d) Erlin (EL)


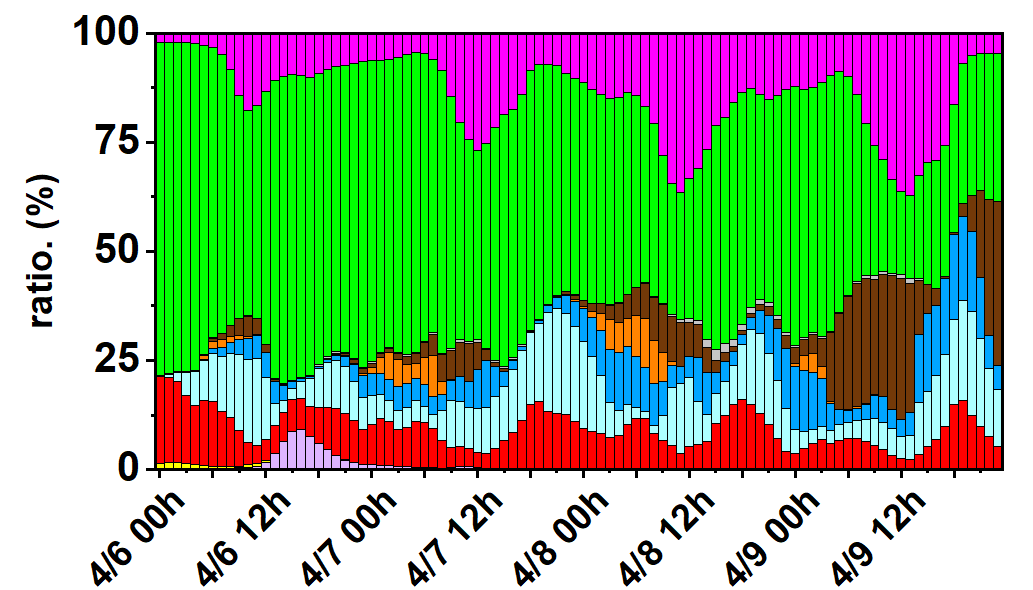

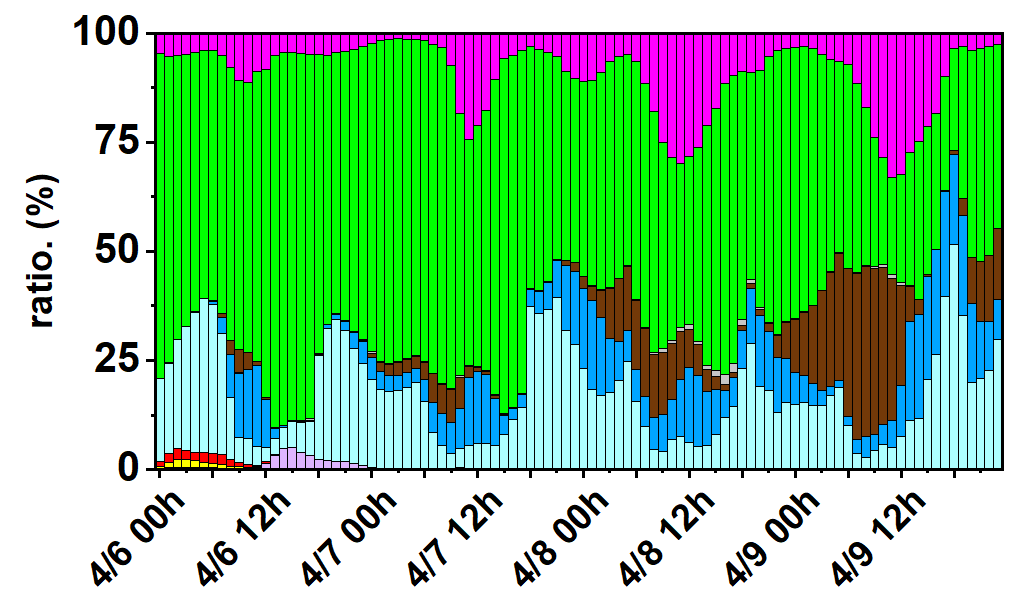


(e) Lunbei (LB) (f) Nantou (NT)


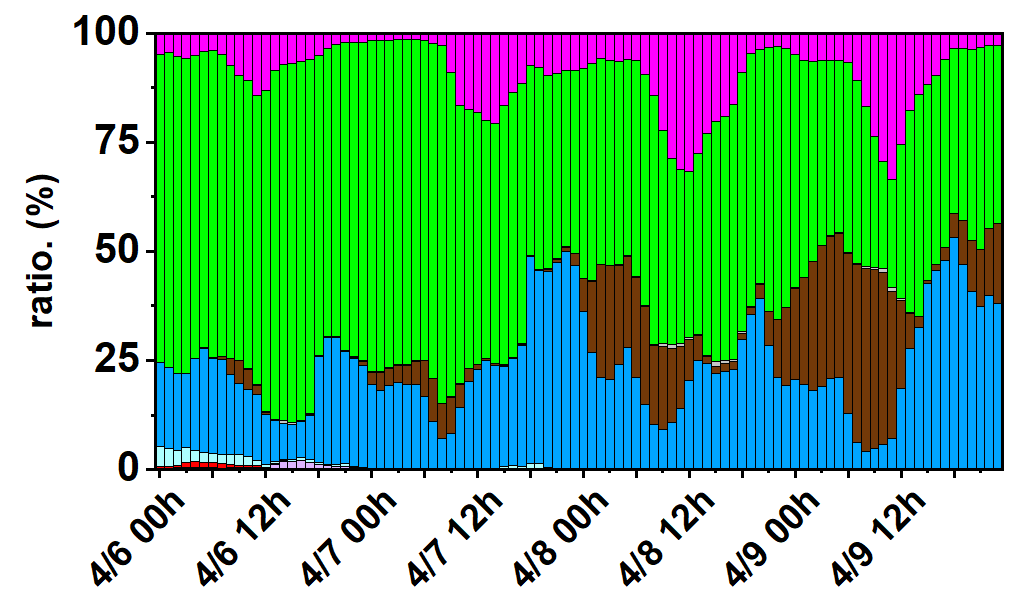

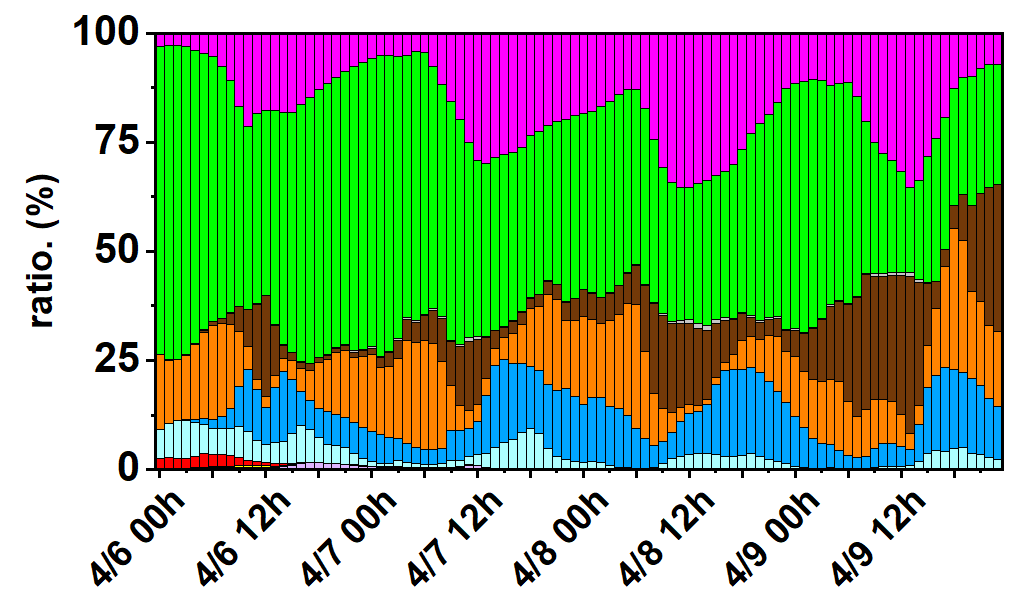


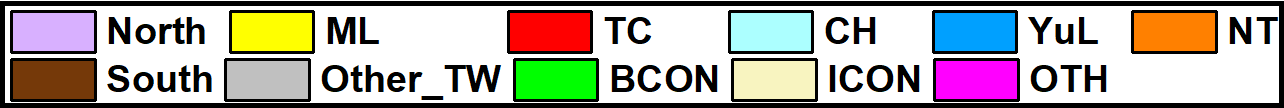


Fig. S10 The percentage of simulated PM2.5 concentration contributed by emissions from different cities/countries at (a) Miaoli (ML), (b) Fengyuan (FY), (c) Zhongming (ZM), (d) Erlin (EL), (e) Lunbei (LB) and (f) Nantou (NT) stations on April 6, 7, 8, and April 9, 2019. The North, ML, TC, CH, YuL, NT, South, East, Other-TW, BCON, ICON, and OTH represent Northern Taiwan, Miaoli County, Taichung City, Changhua County, Yunlin County, Nantou County, Southern Taiwan, Eastern Taiwan, other cities/counties in Taiwan, boundary condition, initial condition, and unresolved contribution, respectively.

(a)
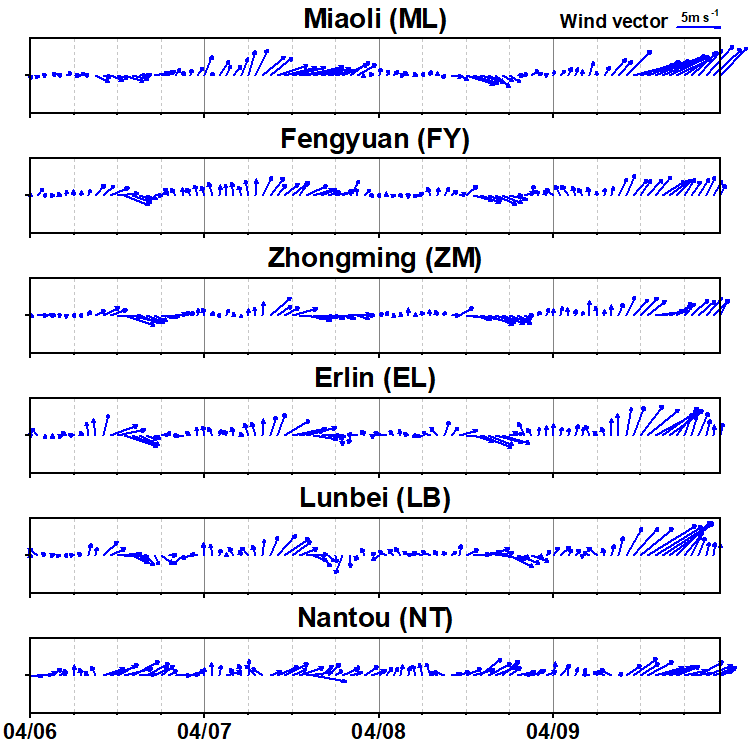
(b)
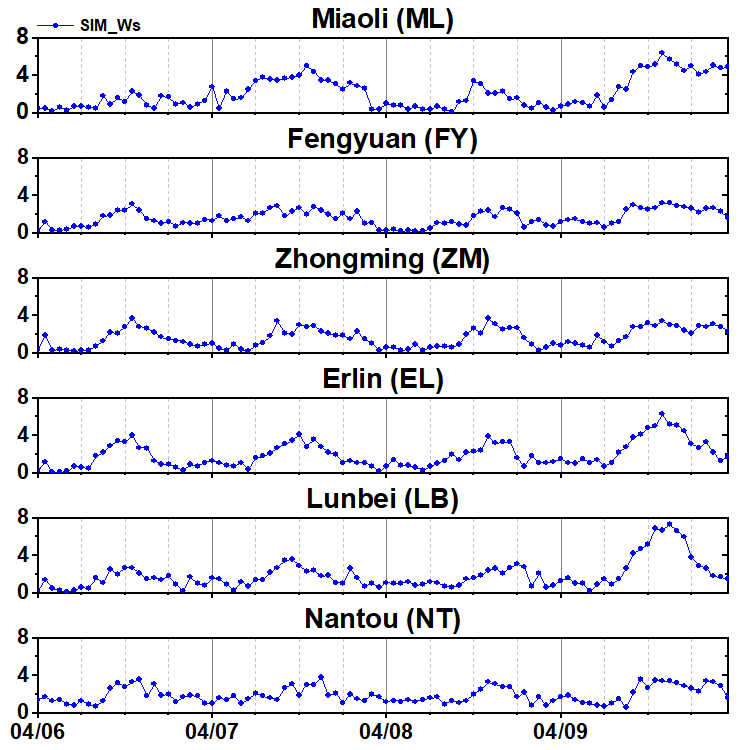


(c)
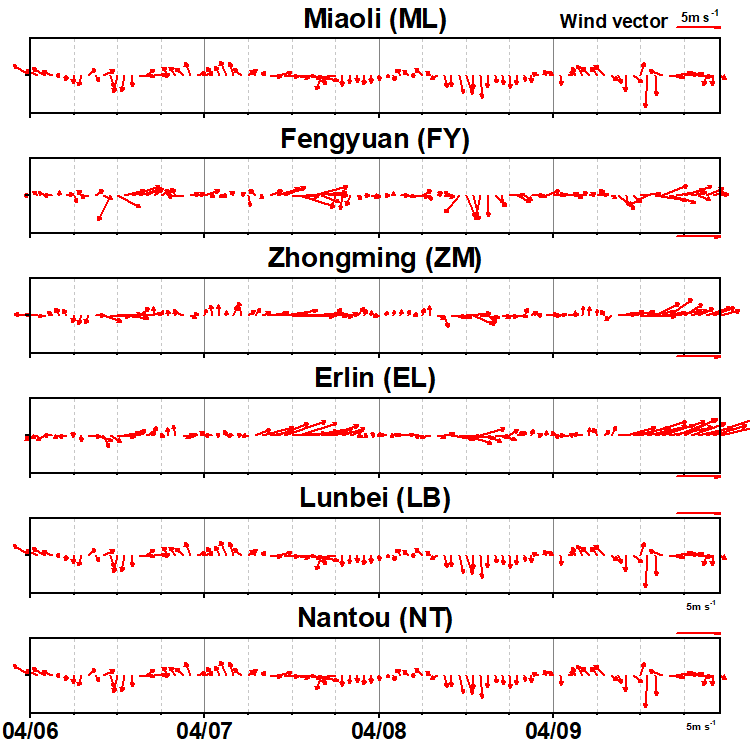
(d)
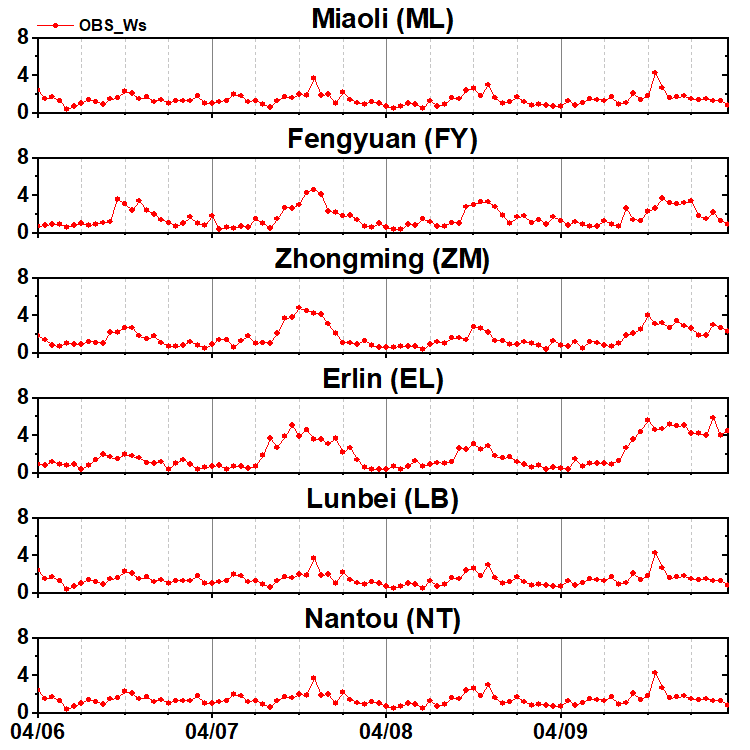


Fig. S11 The simulated (a) wind direction and (b) wind speed, and the observed (c) wind direction and (d) wind speed at Miaoli (ML), Fengyuan (FY), Zhongming (ZM), Erlin (EL), Lunbei (LB), and Nantou (NT) stations on April 6, 7, 8, and April 9, 2019.

(a) Miaoli (ML) (b) Fengyuan (FY)


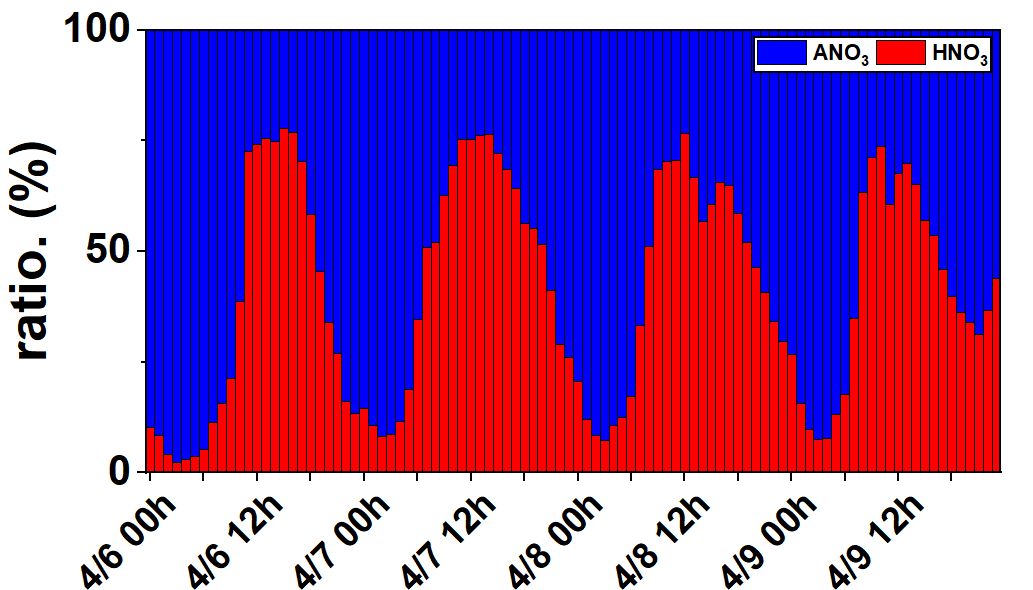

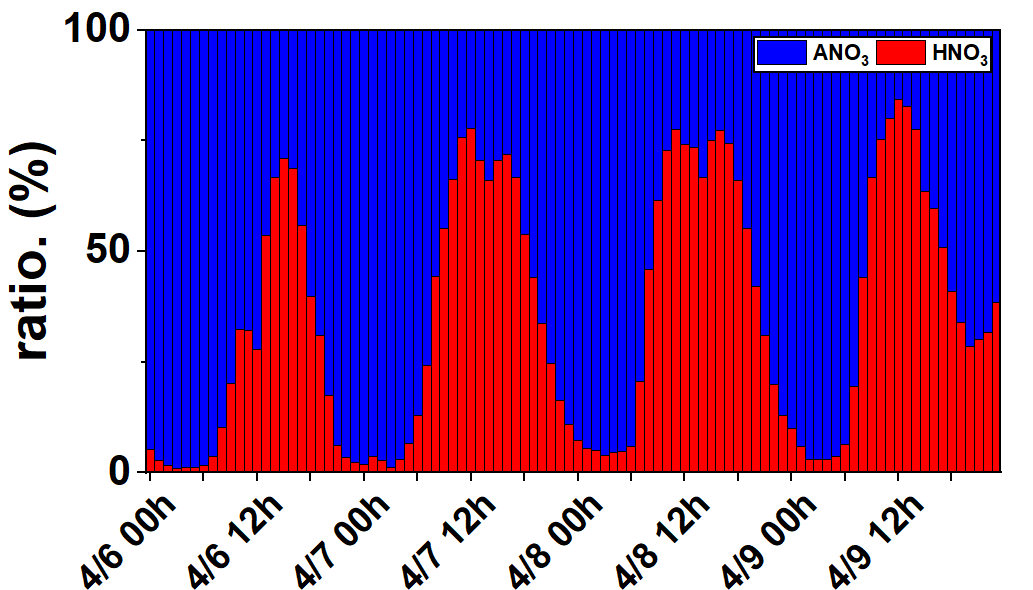


(c) Zhongming (ZM) (d) Erlin (EL)


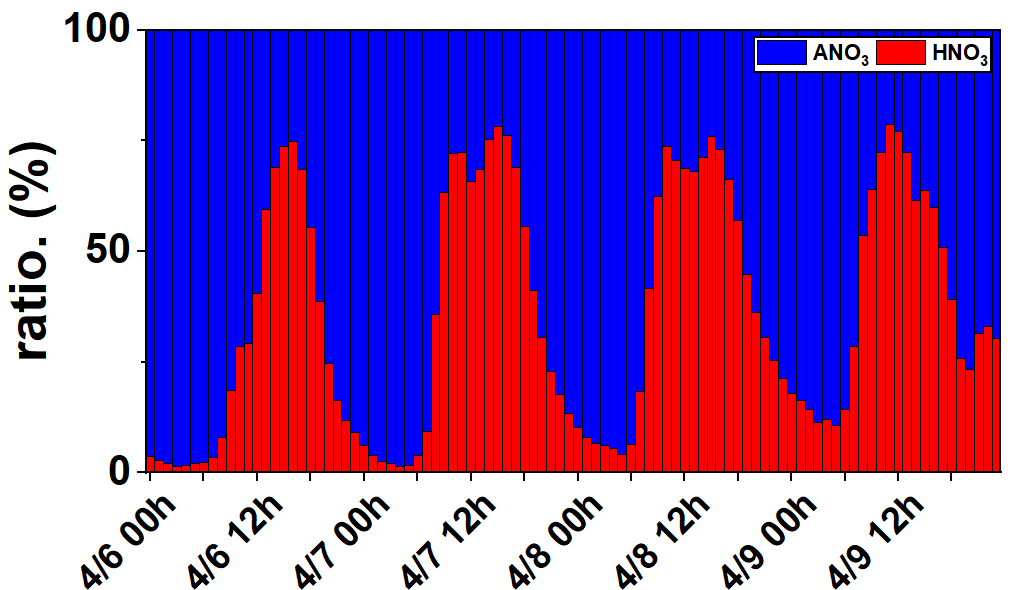

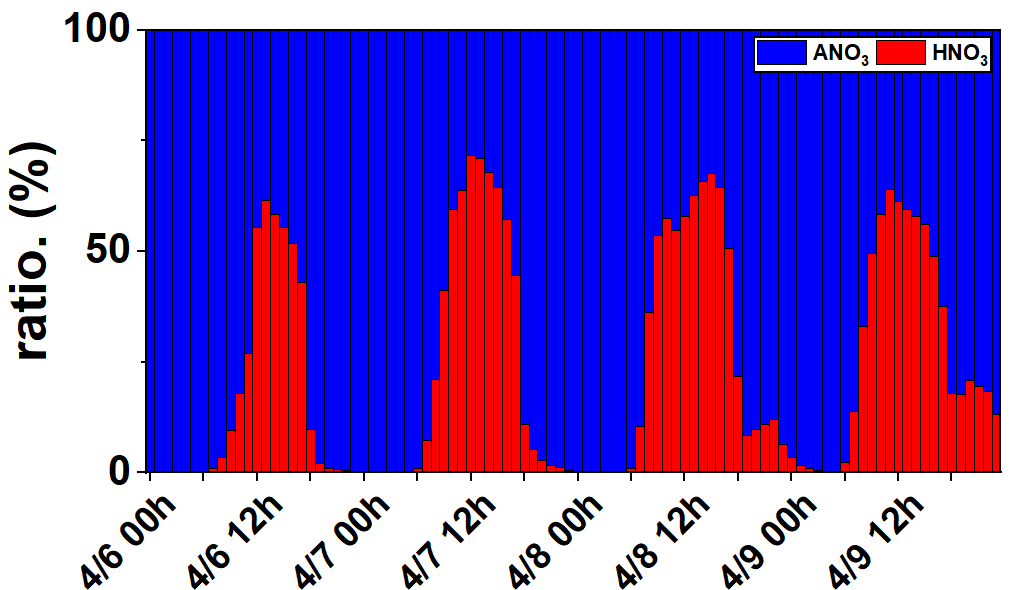


(e) Lunbei (LB) (f) Nantou (NT)


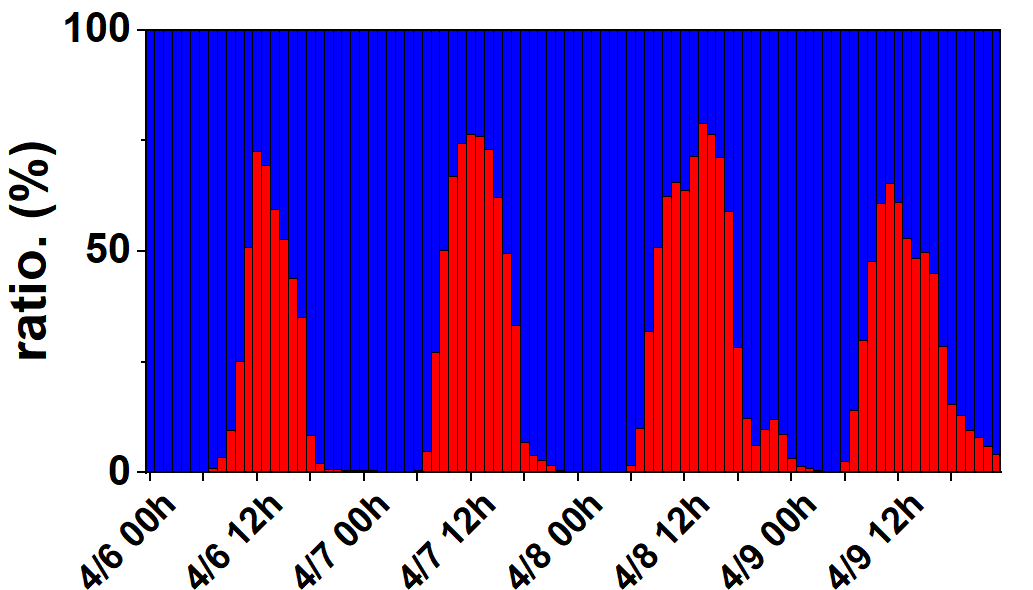

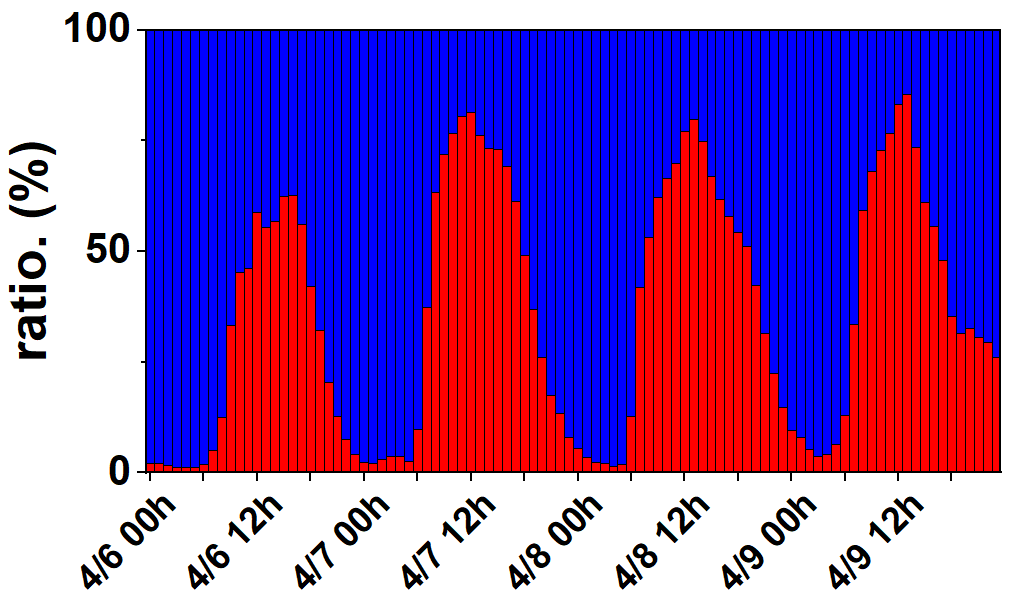


Fig. S12 The percentage of attribution to gas phase (HNO3) and aerosol phase (ANO3) nitrate at (a) Miaoli (ML), (b) Fengyuan (FY), (c) Zhongming (ZM), (d) Erlin (EL), (e) Lunbei (LB) and (f) Nantou (NT) stations on April 6, 7, 8, and April 9, 2019.

(a) Miaoli (ML) (b) Fengyuan (FY)


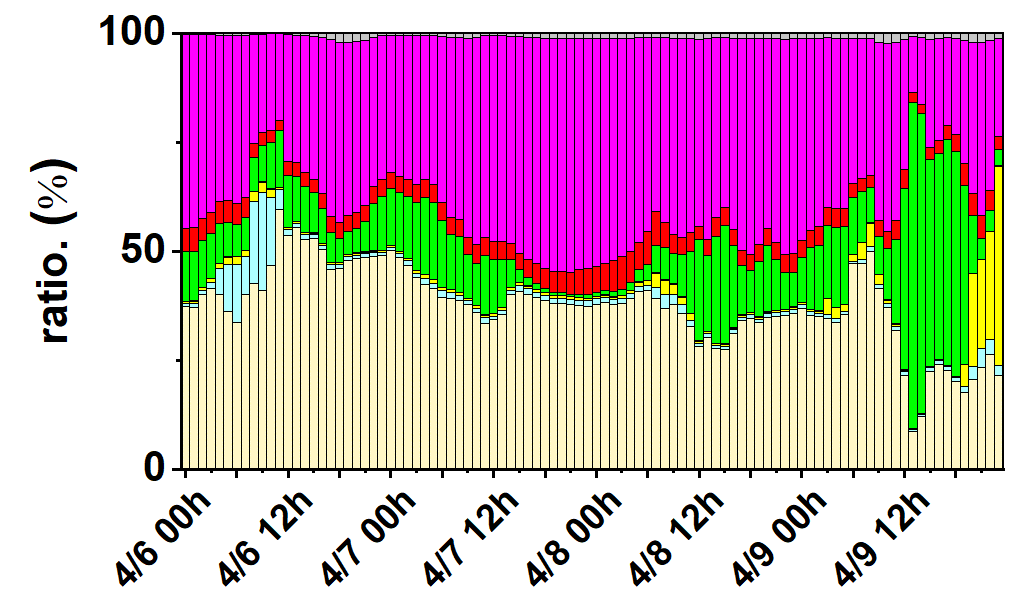

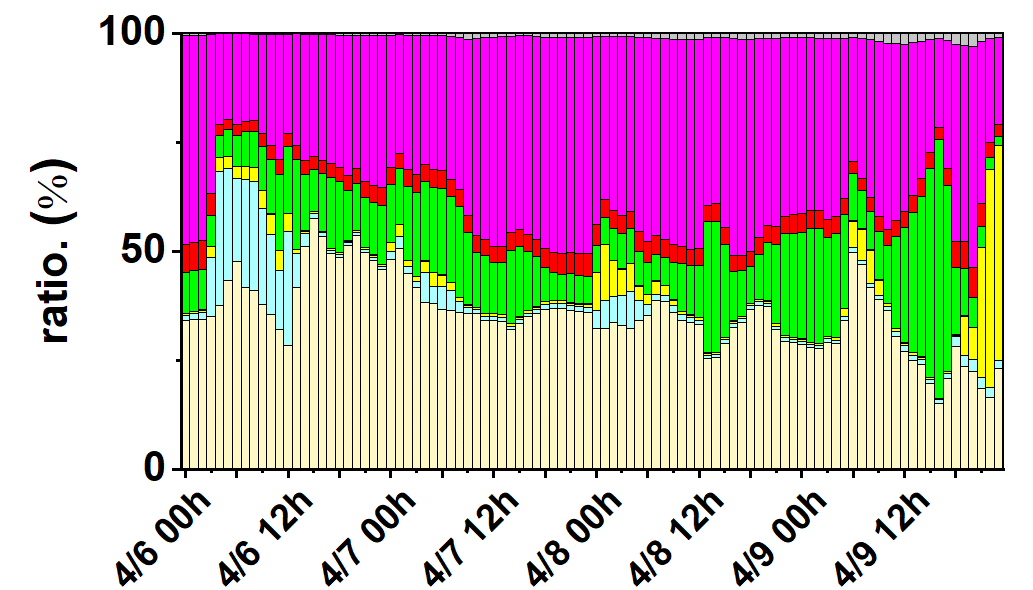


(c) Zhongming (ZM) (d) Erlin (EL)


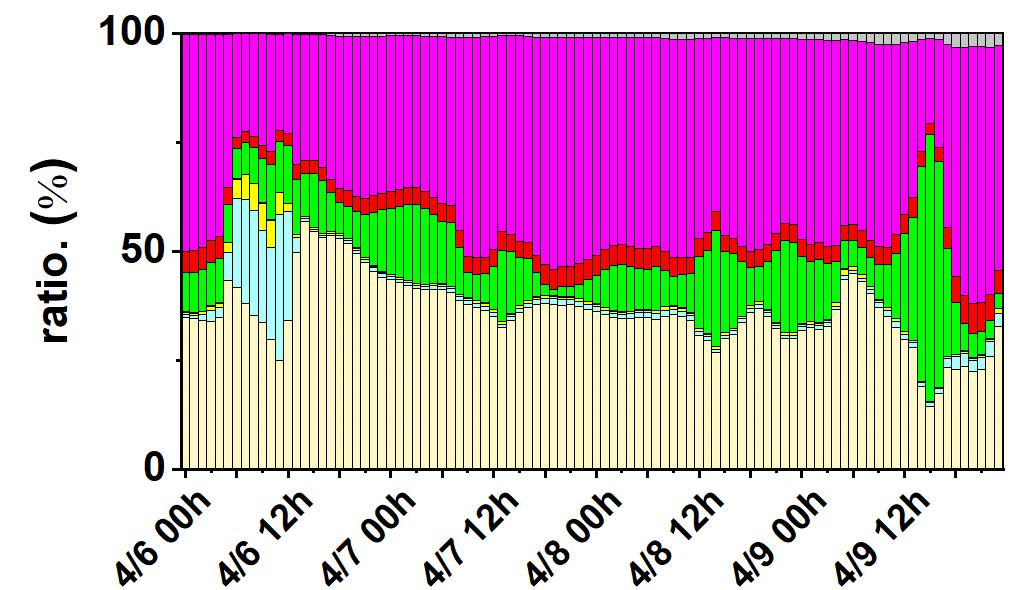

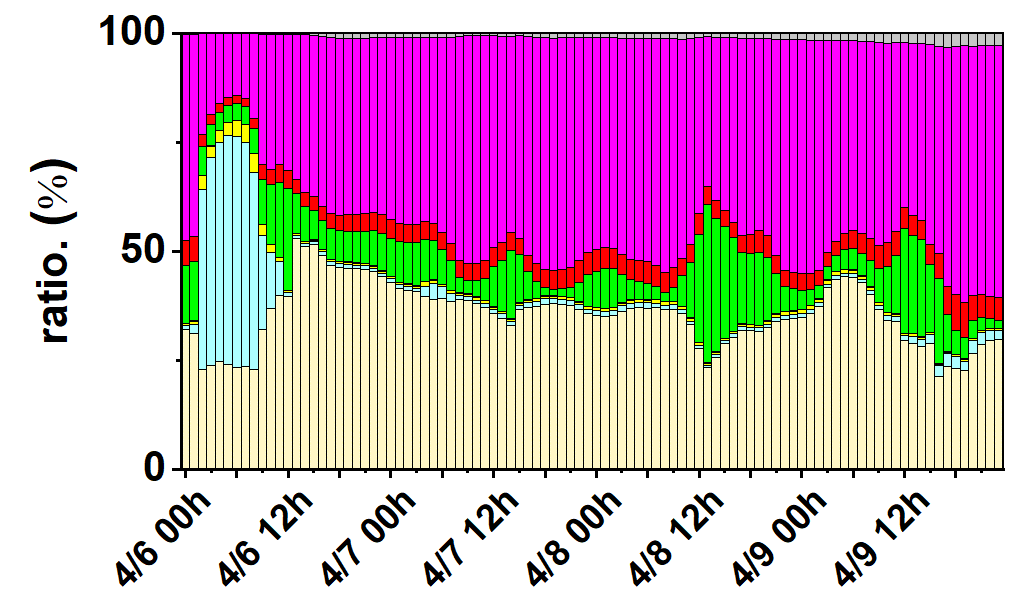


(e) Lunbei (LB) (f) Nantou (NT)


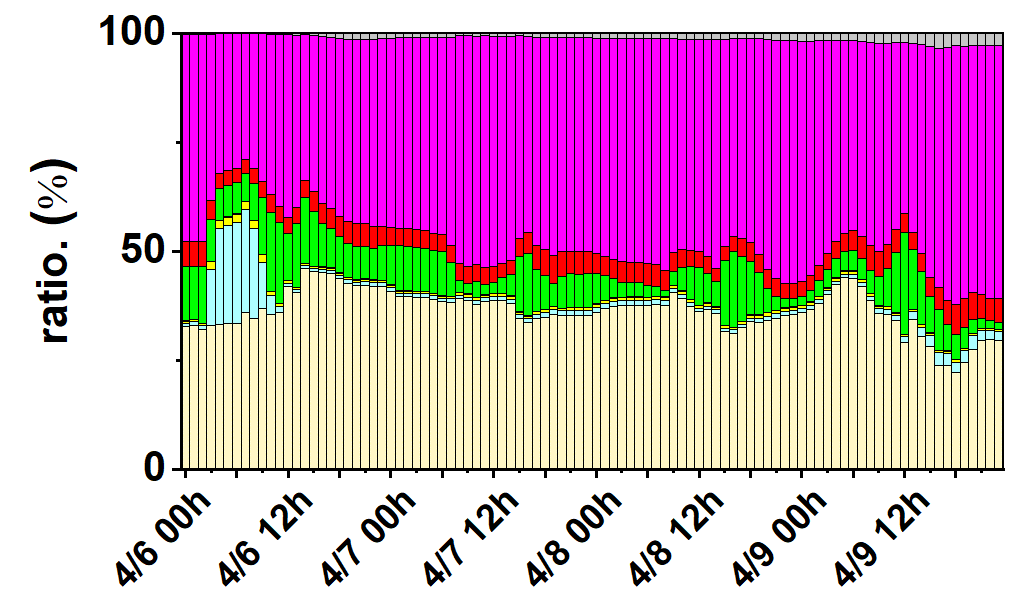

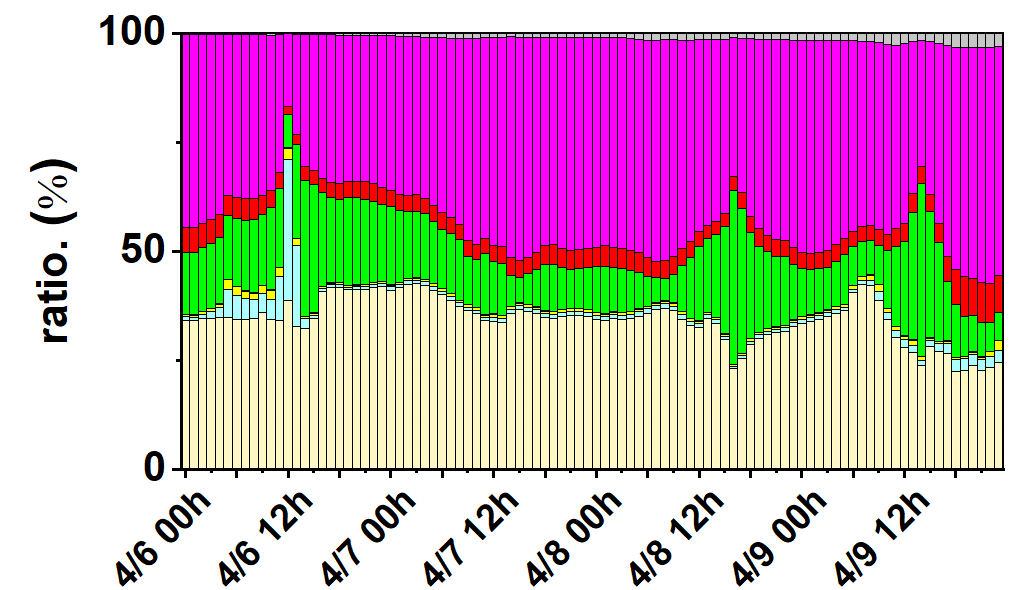

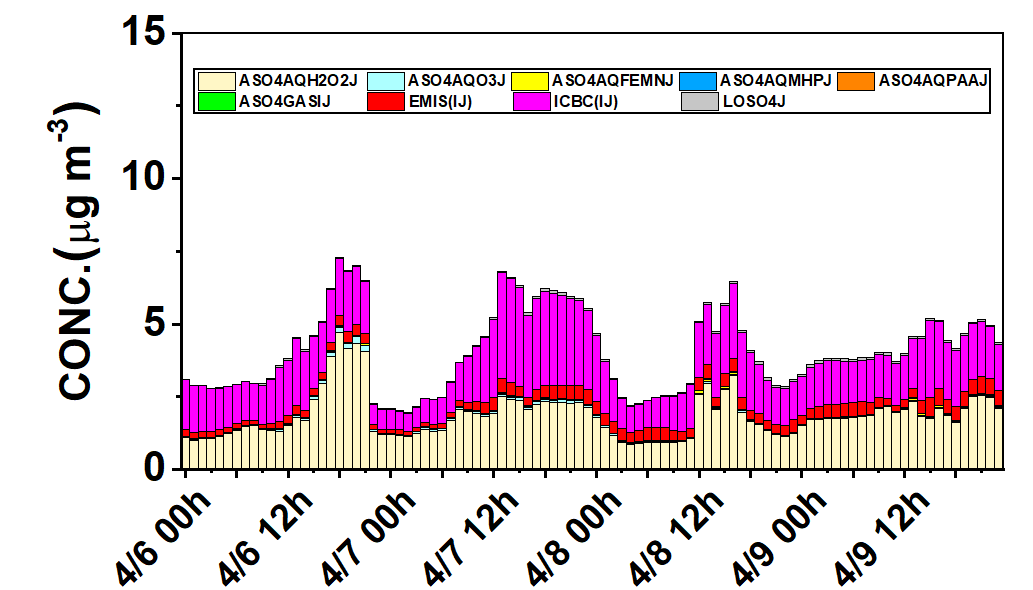


Fig. S13 The percentage of attribution to sulfur tracking method (STM) species at (a) Miaoli (ML), (b) Fengyuan (FY), (c) Zhongming (ZM), (d) Erlin (EL), (e) Lunbei (LB) and (f) Nantou (NT) stations on April 6, 7, 8, and April 9 2019. ASO4AQH2O2J, ASO4AQO3J、ASO4AQFEMNJ、ASO4AQMHPJ、ASO4AQPAAJ、ASO4GASJ、EMIS(J) and ICBC(J) are the eight SO42- in accumulation mode. ASO4GASI、EMIS(I) and ICBC(I) are the three SO42- in Aitken model. LOSO4J is the sum of nine accumulation mode organicsulfate.

(a) Miaoli (ML) (b) Fengyuan (FY)


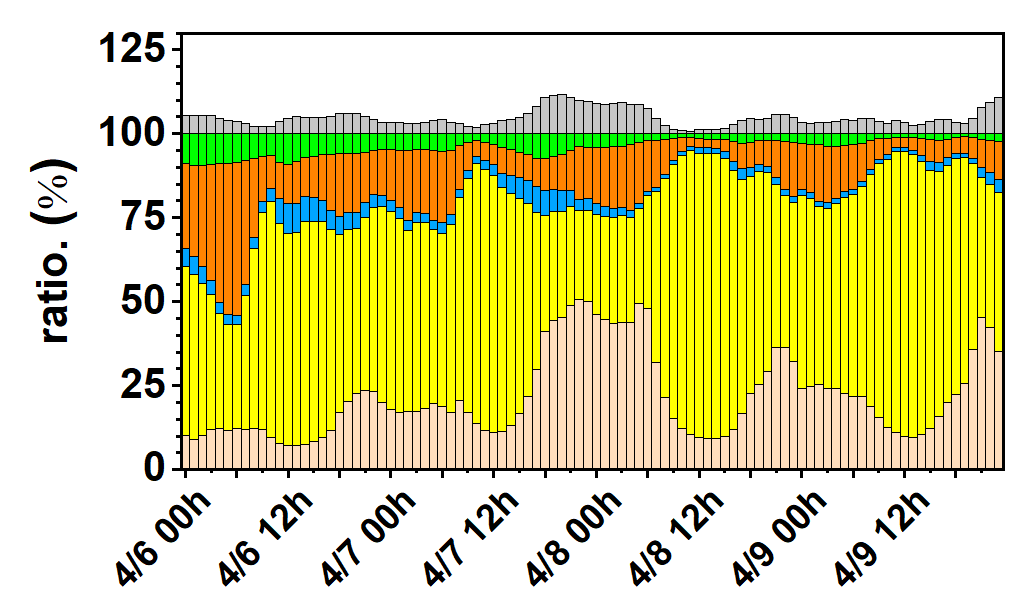

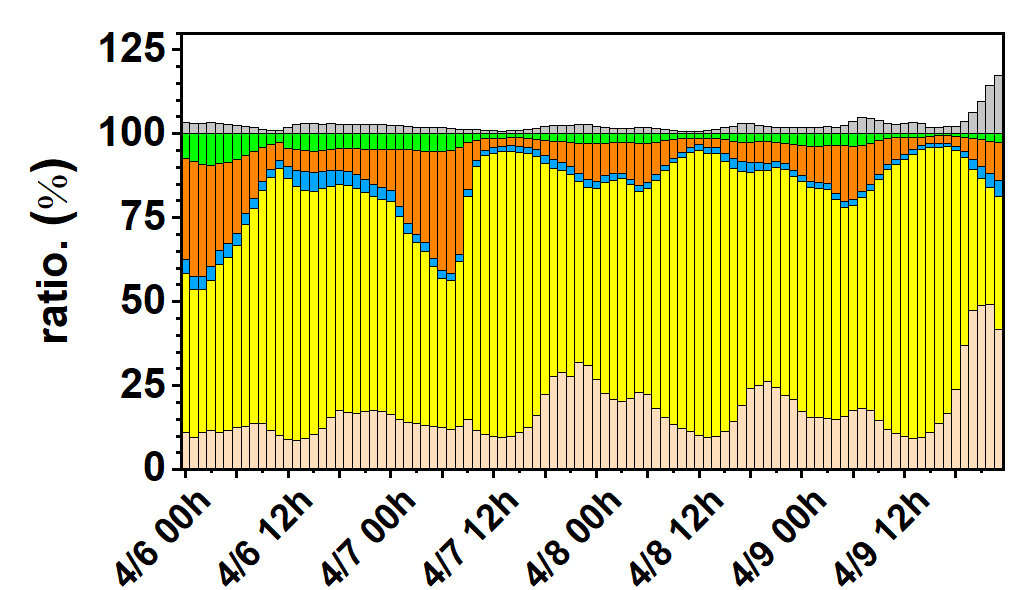


(c) Zhongming (ZM) (d) Erlin (EL)


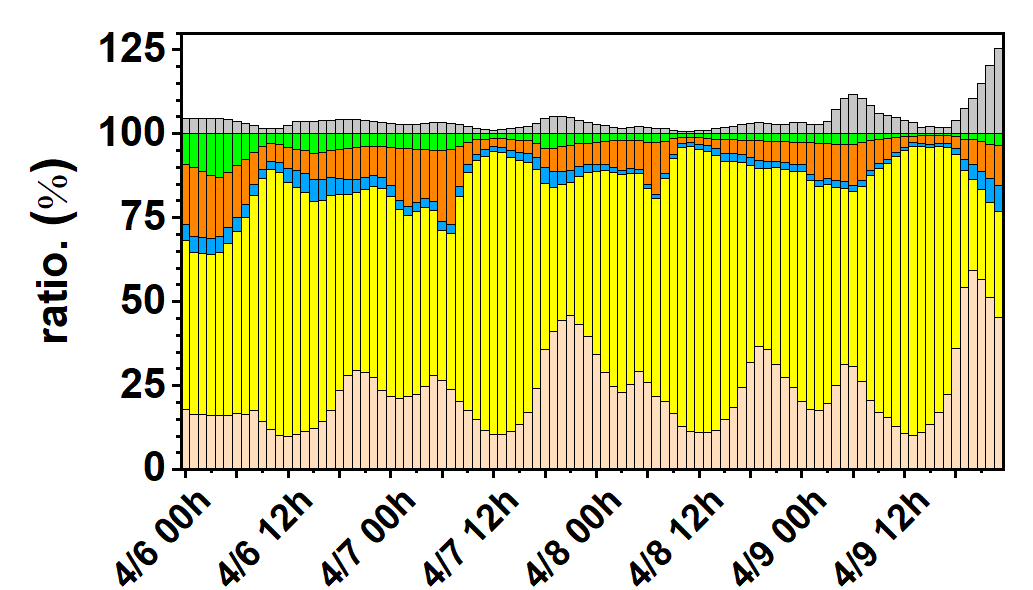

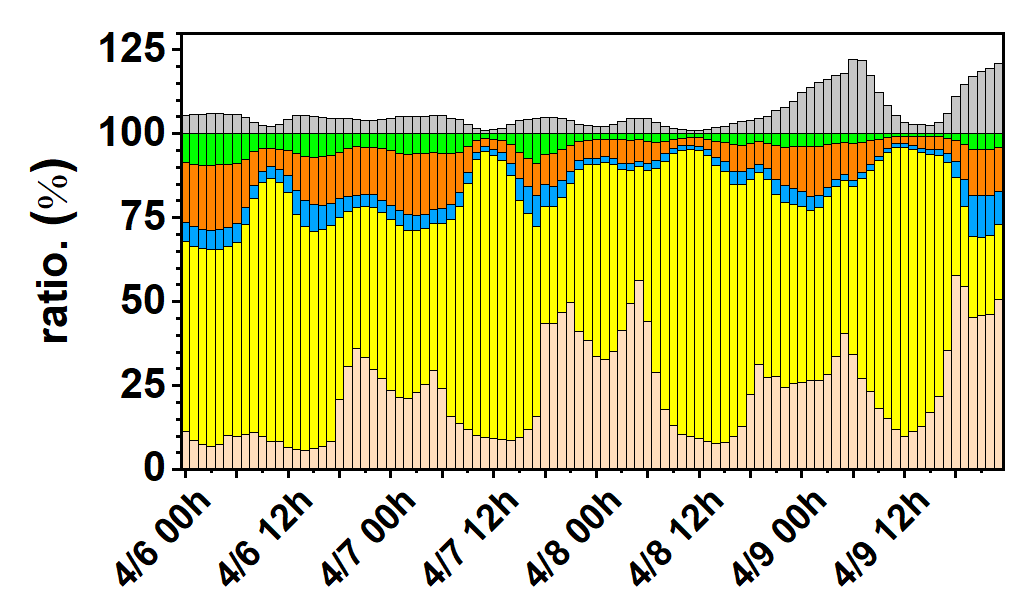


(e) Lunbei (LB) (f) Nantou (NT)


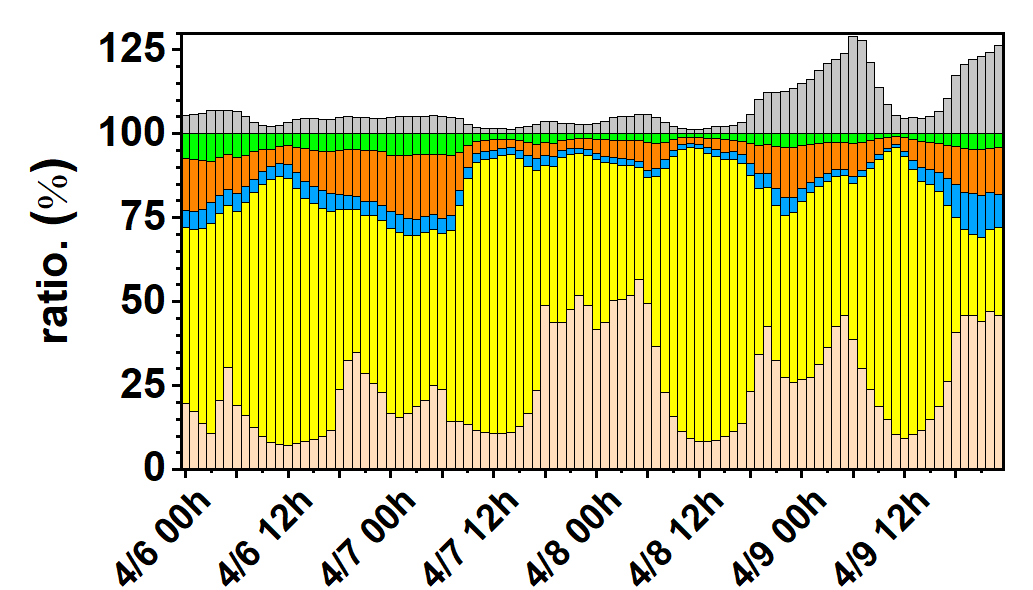

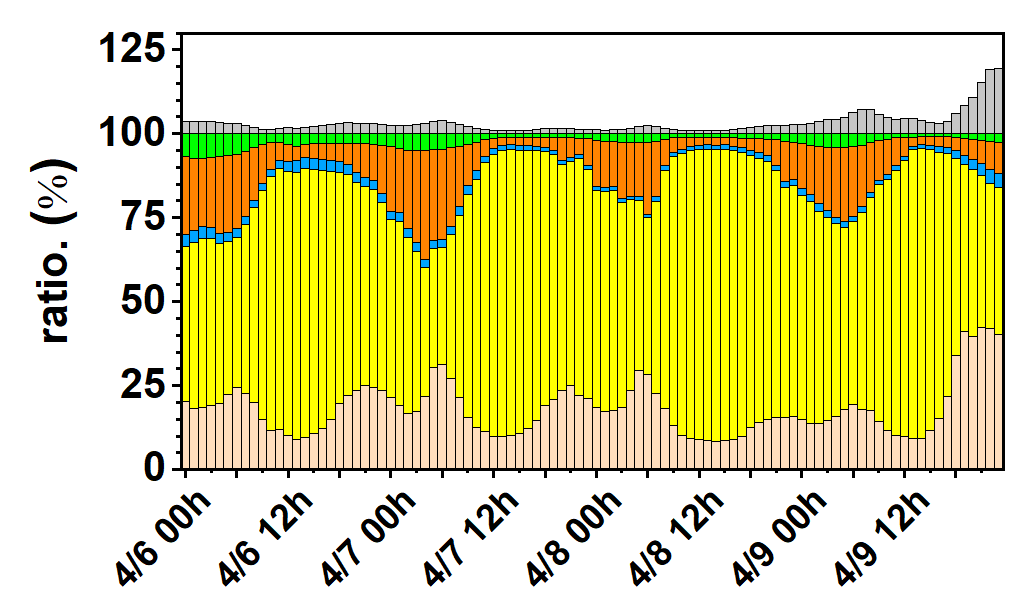

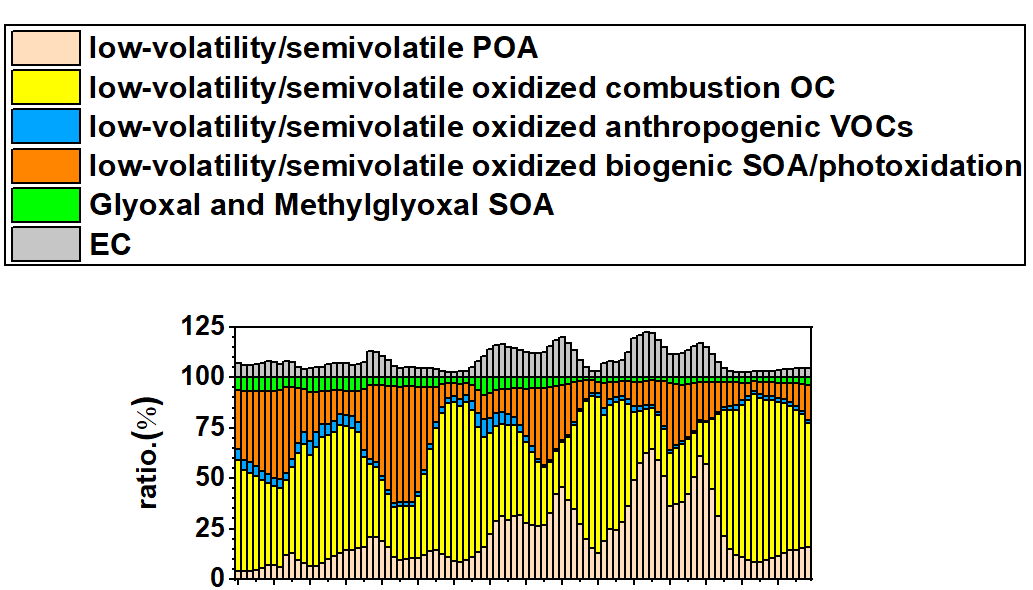


Fig. S14 The percentage of attribution to OC species and EC at the(a) Miaoli (ML), (b) Fengyuan (FY), (c) Zhongming (ZM), (d) Erlin (EL), (e) Lunbei (LB) and (f) Nantou (NT) stations on April 6, 7, 8, and April 9, 2019.
